# Supplementary material for: Projections of Global Mortality and Burden of Disease from 2002 to 2030
Source: PLoS Med. 2006 Nov 28;3(11):e442. doi: 10.1371/journal.pmed.0030442 (PMC1664601; doi:10.1371/journal.pmed.0030442)
Supplement: Dataset S1 — (1 MB XLS) [file pmed.0030442.sd002.xls]

## Sheet: World
Deaths by cause, scenario, sex and age for the years 2002, 2015 and 2030
Source: Mathers CD, Loncar D (2006). Projections of global mortality and burden of disease from 2002 to 2030.
World
						Total deaths ('000)				Baseline deaths ('000)			Baseline projections ('000) by age group
Year		Cause				Baseline	Optimistic	Pessimistic		Male	Female		0-4	5-14	15-59	60-69	70+
2002	Population (millions)					6213.87	6213.87	6213.87		3125.56	3088.31		616.908	1209.7	3758.5	347.44	281.324
2002		All Causes				57010.6	57010.6	57010.6		29904.6	27106		10441.2	1482.69	16147.7	8196.77	20742.3
2002	I.	Communicable, maternal, perinatal and nutritional conditions				18378.4	18378.4	18378.4		9417.54	8960.83		9304.42	835.047	5344.56	946.268	1948.07
2002		A.	Infectious and parasitic diseases			10907.8	10907.8	10907.8		5827.82	5079.95		4811.67	502.289	4275.55	570.91	747.36
2002			1.	Tuberculosis		1564.78	1564.78	1564.78		1029.56	535.229		43.2054	33.1526	1004.47	257.431	226.524
2002			2.	STDs excluding HIV		179.489	179.489	179.489		90.8435	88.6457		67.9276	0.0447591	77.8184	18.015	15.6834
2002			3.	HIV/AIDS		2853.07	2853.07	2853.07		1507.75	1345.33		334.91	116.552	2339.79	55.9709	5.85356
2002			4.	Diarrhoeal diseases		1868.31	1868.31	1868.31		967.721	900.589		1680.25	6.55661	50.7725	29.8381	100.896
2002			5.	Childhood-cluster diseases		1120.27	1120.27	1120.27		560.463	559.803		1032.81	72.0395	13.0035	0.991586	1.41731
2002				a.	Pertussis	293.59	293.59	293.59		146.777	146.813		293.586	0.0017388	0.00310486	0	0
2002				d.	Measles	606.949	606.949	606.949		303.7	303.249		536.382	66.0197	4.5448	0.00254788	0
2002				e.	Tetanus	213.447	213.447	213.447		106.717	106.73		198.2	5.28041	8.10234	0.839813	1.02455
2002			6.	Meningitis		172.791	172.791	172.791		89.5545	83.237		64.3624	31.1427	51.4654	9.61306	16.2079
2002			7.	Hepatitis B and C		156.392	156.392	156.392		106.344	50.0475		11.5376	7.50465	95.9012	19.2475	22.201
2002			8.	Malaria		910.707	910.707	910.707		458.067	452.64		821.053	11.3622	50.0518	11.2138	17.0267
2002			9.	Tropical-cluster diseases		157.844	157.844	157.844		95.1118	62.7324		8.61645	35.1952	80.4425	17.8757	15.7144
2002			10.	Leprosy		6.16066	6.16066	6.16066		4.36508	1.79557		0.439958	0.0949059	2.45067	1.31388	1.86125
2002			11.	Dengue		18.5551	18.5551	18.5551		8.44002	10.1151		4.10808	10.3766	2.6318	0.493451	0.945188
2002			12.	Japanese encephalitis		13.951	13.951	13.951		6.87641	7.07461		5.05325	1.94778	6.0123	0.404483	0.533202
2002			13.	Trachoma		0.154368	0.154368	0.154368		0.154368	0		0.0409799	0.00290009	0.0467111	0	0.0637769
2002			14.	Intestinal nematode infections		11.7587	11.7587	11.7587		5.82097	5.93769		2.66924	5.10012	2.17099	0.827212	0.991092
2002		B.	Respiratory infections			4018.13	4018.13	4018.13		2010.42	2007.72		1831.88	285.571	448.263	338.705	1113.72
2002		C.	Maternal conditions			509.807	509.807	509.807		0	509.807		0.00150475	0.0689076	509.728	0.00196723	0.00713854
2002		D.	Perinatal conditions			2458.51	2458.51	2458.51		1364.75	1093.76		2458.36	0.0678549	0.0713014	0.00450028	0.00393211
2002		E.	Nutritional deficiencies			484.144	484.144	484.144		214.555	269.588		202.507	47.0503	110.953	36.6472	86.9859
			1.	Protein-energy malnutrition		259.695	259.695	259.695		129.315	130.38		147.708	31.6204	23.8202	15.0252	41.5212
			2.	Iodine deficiency		6.52997	6.52997	6.52997		3.05315	3.47683		4.80037	1.21877	0.244648	0.115517	0.150666
			3.	Vitamin A deficiency		22.8836	22.8836	22.8836		10.6672	12.2165		15.9893	4.0941	1.76167	0.57499	0.463533
			4.	Iron-deficiency anaemia		136.672	136.672	136.672		46.7325	89.9398		19.7421	7.89826	76.1467	14.4312	18.454
2002	II.	Noncommunicable diseases				33473.1	33473.1	33473.1		17030.4	16442.7		834.981	240.984	7410.17	6813.57	18173.4
2002		A.	Malignant neoplasms			7108.77	7108.77	7108.77		3967.09	3141.68		36.924	48.8842	2123.3	1831.46	3068.2
2002			1.	Mouth and oropharynx cancers		317.453	317.453	317.453		220.237	97.2157		0.42262	0.575957	116.27	96.3357	103.848
2002			2.	Oesophagus cancer		445.767	445.767	445.767		284.545	161.222		0.0660657	0.105801	127.432	142.05	176.113
2002			3.	Stomach cancer		849.543	849.543	849.543		523.479	326.063		0.122956	0.404664	243.619	221.479	383.918
2002			4.	Colon and rectum cancers		620.996	620.996	620.996		322.112	298.884		0.0405377	0.225713	142.982	146.926	330.822
2002			5.	Liver cancer		617.395	617.395	617.395		427.043	190.352		1.7179	1.14794	248.151	164.444	201.934
2002			6.	Pancreas cancer		230.507	230.507	230.507		121.442	109.065		0.020478	0.0920825	54.753	58.7491	116.892
2002			7.	Trachea, bronchus, lung cancers		1241.72	1241.72	1241.72		888.727	352.996		0.264248	0.781802	310.659	382.901	547.117
2002			8.	Melanoma and other skin cancers		65.8573	65.8573	65.8573		35.3236	30.5337		0.0723473	0.154004	20.9355	14.0755	30.62
2002			9.	Breast cancer		476.126	476.126	476.126		2.69011	473.436		0.0242475	0.0726254	204.914	105.328	165.787
2002			10.	Cervix uteri cancer		238.504	238.504	238.504		0	238.504		0.0130134	0.0476536	106.574	62.852	69.0173
2002			11.	Corpus uteri cancer		71.19	71.19	71.19		0	71.19		0.0155931	0.03013	18.2766	17.2536	35.614
2002			12.	Ovary cancer		134.411	134.411	134.411		0	134.411		0.0541061	0.510604	48.7306	33.1448	51.971
2002			13.	Prostate cancer		268.178	268.178	268.178		268.178	0		0.0171899	0.0392072	13.4844	51.593	203.044
2002			14.	Bladder cancer		178.519	178.519	178.519		125.111	53.4088		0.578301	0.263886	27.1394	41.6392	108.899
2002			15.	Lymphomas, multiple myeloma		333.691	333.691	333.691		168.213	165.478		4.92907	12.2775	109.277	70.3602	136.847
2002			16.	Leukaemia		263.681	263.681	263.681		146.484	117.197		14.8336	21.1042	105.076	39.9816	82.685
2002		B.	Other neoplasms			148.55	148.55	148.55		74.4754	74.0749		4.16205	4.22692	46.3935	24.7325	69.0352
2002		C.	Diabetes mellitus			983.063	983.063	983.063		438.41	544.653		2.78909	2.64679	226.905	250.137	500.585
2002		D.	Endocrine disorders			241.269	241.269	241.269		107.446	133.823		42.3166	7.16945	67.2724	29.9009	94.6096
2002		E.	Neuropsychiatric conditions			1108.83	1108.83	1108.83		573.859	534.971		44.5167	31.493	335.75	90.5307	606.54
2002			1.	Unipolar depressive disorders		13.3411	13.3411	13.3411		5.98474	7.35636		0.0214347	0.0114237	8.59752	2.25996	2.45076
2002			2.	Bipolar disorder		0.729884	0.729884	0.729884		0.203115	0.52677		0.0124246	0.00466089	0.228474	0.0856372	0.398688
2002			3.	Schizophrenia		23.2264	23.2264	23.2264		11.4062	11.8203		0.0454035	0.0681232	14.6124	3.04958	5.45094
2002			4.	Epilepsy		124.599	124.599	124.599		70.0146	54.5846		20.8109	14.2307	69.1178	8.13756	12.3023
2002			5.	Alcohol use disorders		90.4128	90.4128	90.4128		77.1412	13.2716		0.0920819	0.0508276	64.7165	15.8787	9.6746
2002			6.	Alzheimer and other dementias		395.318	395.318	395.318		146.227	249.092		1.48467	0.585441	10.3362	15.6693	367.243
2002			7.	Parkinson disease		98.2443	98.2443	98.2443		50.3598	47.8844		0.337498	0.23923	3.91966	7.84401	85.9039
2002			8.	Multiple sclerosis		16.0141	16.0141	16.0141		6.42844	9.58566		0.0587525	0.166027	8.83725	3.11515	3.83692
2002			9.	Drug use disorders		85.5844	85.5844	85.5844		70.0914	15.493		0.0296445	0.0239245	82.9247	1.61551	0.990595
2002			10.	Post-traumatic stress disorder		0.0559333	0.0559333	0.0559333		0.0290071	0.0269262		0.000861933	0.000671486	0.0244459	0.011161	0.018793
2002			11.	Obsessive-compulsive disorder		0	0	0		0	0		0	0	0	0	0
2002			12.	Panic disorder		0	0	0		0	0		0	0	0	0	0
2002			13.	Insomnia (primary)		0	0	0		0	0		0	0	0	0	0
2002			14.	Migraine		0	0	0		0	0		0	0	0	0	0
2002		F.	Sense organ diseases			3.24202	3.24202	3.24202		1.62058	1.62144		0.20221	0.12891	0.786221	0.410817	1.71386
2002			1.	Glaucoma		0.101445	0.101445	0.101445		0.075126	0.026319		0.00472668	0	0.0327139	0.0242115	0.0397928
2002			2.	Cataracts		0	0	0		0	0		0	0	0	0	0
2002			3.	Vision disorders, age-related		0	0	0		0	0		0	0	0	0	0
2002			4.	Hearing loss, adult onset		0	0	0		0	0		0	0	0	0	0
2002		G.	Cardiovascular diseases			16704.5	16704.5	16704.5		8106.43	8598.06		81.626	49.5073	2926.65	3349.53	10297.2
2002			1.	Rheumatic heart disease		326.856	326.856	326.856		137.701	189.156		14.8072	12.5349	141.478	57.8046	100.232
2002			2.	Hypertensive heart disease		908.225	908.225	908.225		418.121	490.104		1.50833	1.49195	168.515	196.561	540.15
2002			3.	Ischaemic heart disease		7195.35	7195.35	7195.35		3795.41	3399.94		5.68422	5.39942	1336.97	1598.12	4249.18
2002			4.	Cerebrovascular disease		5501.84	5501.84	5501.84		2546.68	2955.15		12.0969	9.63465	782.59	1119.85	3577.66
2002			5.	Inflammatory heart diseases		402.853	402.853	402.853		210.364	192.489		12.7639	4.84013	110.73	69.4855	205.033
2002		H.	Respiratory diseases			3697.25	3697.25	3697.25		1909.62	1787.63		62.6776	17.7057	594.474	682.611	2339.78
2002			1.	Chronic obstructive pulmonary disease		2745.82	2745.82	2745.82		1411.81	1334.01		3.68502	0.62698	342.662	540.206	1858.64
2002			2.	Asthma		239.844	239.844	239.844		121.943	117.901		4.34004	7.31009	120.272	37.014	70.9084
2002		I.	Digestive diseases			1964.35	1964.35	1964.35		1091.98	872.371		111.297	41.982	758.376	363.739	688.961
2002			1.	Peptic ulcer disease		263.98	263.98	263.98		154.615	109.365		5.80756	3.16799	100.08	50.0326	104.892
2002			2.	Cirrhosis of the liver		785.245	785.245	785.245		502.127	283.118		23.7583	11.0342	383.531	175.283	191.638
2002		J.	Genitourinary diseases			845.352	845.352	845.352		440.987	404.365		19.7028	13.1194	244.829	161.919	405.781
2002			1.	Nephritis and nephrosis		675.728	675.728	675.728		344.143	331.585		16.209	11.9383	208.211	132.96	306.41
2002			2.	Benign prostatic hypertrophy		32.2923	32.2923	32.2923		32.2923	0		0	0	5.78549	6.52244	19.9843
2002		K.	Skin diseases			68.5119	68.5119	68.5119		26.1132	42.3987		2.02343	0.847536	17.4976	10.6654	37.4779
2002		L.	Musculoskeletal diseases			106.051	106.051	106.051		37.4487	68.6024		2.22348	2.12579	29.1967	14.6773	57.8279
2002			1.	Rheumatoid arthritis		24.7766	24.7766	24.7766		7.2318	17.5448		0.0252644	0.105672	5.29289	4.87157	14.4812
2002			2.	Osteoarthritis		4.72436	4.72436	4.72436		1.60208	3.12228		0.0143842	0.00156789	0.26902	0.365056	4.07433
2002		M.	Congenital anomalies			491.749	491.749	491.749		254.114	237.634		424.416	21.0534	38.1082	3.06172	5.10981
2002		N.	Oral conditions			1.60512	1.60512	1.60512		0.779543	0.825578		0.103914	0.09412	0.627518	0.1915	0.588069
2002	III.	Injuries				5159.14	5159.14	5159.14		3456.71	1702.42		301.803	406.658	3392.93	436.927	620.819
2002		A.	Unintentional injuries			3544.76	3544.76	3544.76		2302.89	1241.87		288.008	370.719	2088.73	308.272	489.041
2002			1.	Road traffic accidents		1189.49	1189.49	1189.49		866.964	322.526		50.0096	132.46	813.622	93.7859	99.6116
2002			2.	Poisonings		349.91	349.91	349.91		224.604	125.306		15.6396	19.9723	232.575	50.8002	30.9227
2002			3.	Falls		391.309	391.309	391.309		235.871	155.438		16.4197	20.564	143.678	45.9048	164.743
2002			4.	Fires		311.371	311.371	311.371		119.868	191.503		39.6449	34.1603	190.64	18.4172	28.5085
2002			5.	Drownings		381.639	381.639	381.639		261.768	119.872		57.8059	86.8792	191.618	19.3586	25.9781
2002			6.	Other unintentional injuries		921.046	921.046	921.046		593.819	327.227		108.488	76.6826	516.593	80.0056	139.277
2002		B.	Intentional injuries			1614.37	1614.37	1614.37		1153.82	460.552		13.7954	35.9397	1304.2	128.654	131.778
2002			1.	Self-inflicted injuries		872.663	872.663	872.663		545.47	327.193		0.120073	14.7542	669.613	87.9259	100.249
2002			2.	Violence		557.915	557.915	557.915		443.909	114.006		12.5963	18.3133	473.142	29.308	24.5555
2002			3.	War		171.021	171.021	171.021		154.172	16.8492		0.361749	2.22966	152.182	10.3499	5.89742
2015	Population (millions)					7103.3	7131.89	7059.48		3522.05	3581.25		650.275	1233.57	4380.16	470.016	369.284
2015		All Causes				63459	59171.1	68547		33729.7	29729.3		7781.6	1156.75	18383.5	9360.78	26776.3
2015	I.	Communicable, maternal, perinatal and nutritional conditions				16191.7	13105	19335		8633.32	7558.41		6799.67	571.407	6130.29	778.33	1912.03
2015		A.	Infectious and parasitic diseases			10240.7	8207.08	12244.8		5654.78	4585.96		3400.53	361.873	5318.52	479.778	680.037
2015			1.	Tuberculosis		960.155	738.992	1270.1		627.52	332.636		32.4155	22.014	651.262	135.025	119.439
2015			2.	STDs excluding HIV		149.329	111.498	190.354		81.0198	68.309		46.9818	0.0206933	72.6087	13.9212	15.7964
2015			3.	HIV/AIDS		4320.3	3788.25	4766.22		2448.09	1872.21		99.3289	127.957	3932.95	137.616	22.4417
2015			4.	Diarrhoeal diseases		1301.29	958.376	1654.77		689.612	611.676		1117.1	3.66125	41.7008	24.8707	113.959
2015			5.	Childhood-cluster diseases		789.025	566.289	998.722		406.198	382.827		733.611	44.8658	8.25886	0.807092	1.48162
2015				a.	Pertussis	207.908	151.833	265.484		107.217	100.691		207.906	0.000866538	0.00154915	0	0
2015				d.	Measles	431.535	305.983	541.551		221.757	209.778		388.426	41.2795	1.82936	0.000860135	0
2015				e.	Tetanus	145.64	105.486	186.6		75.0705	70.5695		134.357	3.28988	6.21994	0.678065	1.09538
2015			6.	Meningitis		106.372	80.2339	141.682		58.2724	48.0997		34.6854	15.7797	32.9739	6.85435	16.0788
2015			7.	Hepatitis B and C		113.186	88.8488	144.769		75.6449	37.5415		9.17026	5.64341	62.2798	14.0831	22.0099
2015			8.	Malaria		822.297	596.291	982.855		417.075	405.222		731.19	9.4338	50.8126	10.825	20.0357
2015			9.	Tropical-cluster diseases		128.964	95.9261	164.784		80.1238	48.8399		6.29549	22.4724	69.6448	15.0359	15.5151
2015			10.	Leprosy		5.01748	3.9409	6.13069		3.64284	1.37465		0.27147	0.0417579	1.83271	1.0159	1.85564
2015			11.	Dengue		9.0279	6.33812	12.0543		4.3673	4.6606		1.72081	4.3408	1.53262	0.364261	1.06941
2015			12.	Japanese encephalitis		7.28173	5.59387	10.3748		3.99883	3.28289		1.94022	0.772586	3.76344	0.279152	0.526326
2015			13.	Trachoma		0.124561	0.101574	0.151664		0.124561	0		0.0258272	0.00153918	0.0355276	0	0.0616667
2015			14.	Intestinal nematode infections		7.53413	5.52306	9.97475		3.95866	3.57547		1.13445	2.59756	1.93791	0.739367	1.12484
2015		B.	Respiratory infections			3204.01	2543.93	3895.83		1676.15	1527.86		1221.73	183.702	375.42	272.995	1150.16
2015		C.	Maternal conditions			360.207	242.164	495.888		0	360.207		0.000662765	0.0284656	360.168	0.00145003	0.00790016
2015		D.	Perinatal conditions			2032.39	1841.62	2251.36		1136.18	896.206		2032.3	0.0372205	0.0415174	0.00371962	0.00305218
2015		E.	Nutritional deficiencies			354.386	270.21	447.123		166.209	188.177		145.1	25.766	76.1437	25.5514	81.825
2015			1.	Protein-energy malnutrition		190.756	143.954	237.883		98.4028	92.3529		103.887	16.1254	17.1506	12.0046	41.5882
2015			2.	Iodine deficiency		4.58423	3.35689	6.01184		2.26014	2.32409		3.42859	0.705063	0.22219	0.0937066	0.134684
2015			3.	Vitamin A deficiency		19.5957	13.9595	24.2133		9.28541	10.3103		14.1357	2.71565	1.7411	0.528511	0.474712
2015			4.	Iron-deficiency anaemia		96.1998	75.511	123.427		36.7704	59.4294		14.8603	5.10994	50.4101	8.81875	17.0008
2015	II.	Noncommunicable diseases				41227.1	40052.2	43009.8		21067.9	20159.2		683.192	186.685	8353.92	8028.89	23974.4
2015		A.	Malignant neoplasms			9108.23	8993.69	9058.73		5082.23	4026.01		39.2572	47.8852	2517.39	2350.01	4153.7
2015			1.	Mouth and oropharynx cancers		417.891	404.9	419.182		278.948	138.944		0.515456	0.666995	139.878	122.768	154.062
2015			2.	Oesophagus cancer		590.877	582.588	580.382		367.692	223.185		0.08103	0.123819	154.863	189.565	246.244
2015			3.	Stomach cancer		1102.64	1096.29	1078.33		679.464	423.179		0.134733	0.442528	284.276	281.717	536.072
2015			4.	Colon and rectum cancers		763.399	760.87	744.611		402.324	361.075		0.0437691	0.251932	158.703	171.487	432.914
2015			5.	Liver cancer		792.57	785.011	786.521		544.872	247.698		1.73732	1.12561	297.799	215.019	276.889
2015			6.	Pancreas cancer		274.812	273.481	270.688		145.192	129.619		0.0172343	0.0746098	58.9787	67.5065	148.235
2015			7.	Trachea, bronchus, lung cancers		1673.02	1642.71	1715.52		1175.47	497.55		0	0	416.205	531.342	725.469
2015			8.	Melanoma and other skin cancers		79.4243	78.8346	78.6435		42.6373	36.787		0.0846533	0.165273	21.4019	16.8606	40.9118
2015			9.	Breast cancer		584.831	574.337	581.421		3.12043	581.711		0.0273907	0.0857999	239.076	134.846	210.796
2015			10.	Cervix uteri cancer		320.473	310.829	318.064		0	320.473		0.0144961	0.0554995	132.889	88.0364	99.4773
2015			11.	Corpus uteri cancer		85.1073	84.6061	84.2074		0	85.1073		0.0233347	0.0396204	20.3296	21.0352	43.6796
2015			12.	Ovary cancer		160.221	156.105	158.373		0	160.221		0.0635972	0.563853	54.2107	40.8543	64.5284
2015			13.	Prostate cancer		367.06	368.607	359.683		367.06	0		0.0205694	0.0447163	15.5468	60.7806	290.667
2015			14.	Bladder cancer		237.604	236.321	232.708		166.556	71.0479		0.676385	0.281676	32.3278	50.1286	154.19
2015			15.	Lymphomas, multiple myeloma		421.735	412.694	419.283		210.477	211.258		5.98003	14.0456	129.177	88.7421	183.791
2015			16.	Leukaemia		306.386	303.186	304.93		170.818	135.567		15.0316	19.436	113.825	49.6534	108.44
2015		B.	Other neoplasms			188.081	186.694	186.957		94.4168	93.6637		4.45746	4.45791	55.003	31.3614	92.8008
2015		C.	Diabetes mellitus			1660.95	1573.89	1727.6		710.646	950.307		2.39405	2.14256	400.195	395.757	860.464
2015		D.	Endocrine disorders			269.234	257.307	283.009		122.374	146.86		28.835	5.35777	71.4207	36.8313	126.789
2015		E.	Neuropsychiatric conditions			1334.13	1302.52	1379.74		697.265	636.864		38.1251	26.8963	362.951	105.384	800.772
2015			1.	Unipolar depressive disorders		16.5295	16.2206	17.0382		7.47709	9.05238		0.0187248	0.00864004	10.6379	2.73035	3.13389
2015			2.	Bipolar disorder		0.840588	0.81628	0.874427		0.226517	0.614071		0.00937109	0.00355127	0.251029	0.100256	0.476381
2015			3.	Schizophrenia		27.768	27.2691	28.855		13.3809	14.3871		0.0349872	0.0462559	16.9143	3.59092	7.18152
2015			4.	Epilepsy		130.569	122.859	139.208		74.6609	55.908		17.0371	12.2115	74.9521	9.76672	16.6016
2015			5.	Alcohol use disorders		97.3044	94.1833	102.133		83.0881	14.2163		0.074194	0.0337731	67.6366	17.5729	11.9869
2015			6.	Alzheimer and other dementias		513.23	508.986	523.029		204.124	309.107		1.18811	0.425775	10.5046	17.9888	483.123
2015			7.	Parkinson disease		127.293	126.087	130.071		68.7673	58.5257		0.292398	0.178586	4.11633	9.22715	113.478
2015			8.	Multiple sclerosis		16.6694	16.0478	17.6326		6.73429	9.9351		0.0456284	0.143066	8.31293	3.55679	4.61097
2015			9.	Drug use disorders		95.4905	92.7516	101.068		78.4458	17.0447		0.023414	0.0159449	92.0872	2.04108	1.32283
2015			10.	Post-traumatic stress disorder		0.0719081	0.0695214	0.0751351		0.0379805	0.0339275		0.000761075	0.000499446	0.0281393	0.0130373	0.0294709
2015			11.	Obsessive-compulsive disorder		0	0	0		0	0		0	0	0	0	0
2015			12.	Panic disorder		0	0	0		0	0		0	0	0	0	0
2015			13.	Insomnia (primary)		0	0	0		0	0		0	0	0	0	0
2015			14.	Migraine		0	0	0		0	0		0	0	0	0	0
2015		F.	Sense organ diseases			4.04385	3.95189	4.17062		2.04366	2.00019		0.144683	0.0984622	0.837407	0.487954	2.47534
2015			1.	Glaucoma		0.127285	0.124559	0.130489		0.0920427	0.0352425		0.00318239	0	0.0384116	0.0297078	0.0559834
2015			2.	Cataracts		0	0	0		0	0		0	0	0	0	0
2015			3.	Vision disorders, age-related		0	0	0		0	0		0	0	0	0	0
2015			4.	Hearing loss, adult onset		0	0	0		0	0		0	0	0	0	0
2015		G.	Cardiovascular diseases			19744.5	19369.9	20790.8		9588.8	10155.7		81.7064	33.4836	3064	3589.52	12975.8
2015			1.	Rheumatic heart disease		346.482	331.447	381.653		149.649	196.833		13.629	8.24282	137.204	62.8957	124.511
2015			2.	Hypertensive heart disease		1079.5	1040.4	1152.96		504.683	574.815		1.53953	1.14004	173.597	206.602	696.62
2015			3.	Ischaemic heart disease		8501.3	8344.46	8925.97		4448.55	4052.75		5.46943	3.39275	1443.26	1738.31	5310.87
2015			4.	Cerebrovascular disease		6466.23	6381.42	6791.78		3011.47	3454.76		12.3259	7.44031	812.474	1182.79	4451.2
2015			5.	Inflammatory heart diseases		459.316	447.224	491.82		234.763	224.553		13.221	3.30391	107.515	73.0059	262.271
2015		H.	Respiratory diseases			5179.05	4863.98	5529.2		2755.66	2423.39		57.2051	15.0015	784.112	902.118	3420.61
2015			1.	Chronic obstructive pulmonary disease		3952.44	3706.4	4239.21		2103.24	1849.21		3.40161	0.533604	484.222	727.701	2736.59
2015			2.	Asthma		295.468	274.989	315.083		153.506	141.962		3.7599	5.92568	141.932	43.1886	100.662
2015		I.	Digestive diseases			2086.15	1916.14	2306.87		1167.65	918.505		63.9858	25.3461	755.433	387	854.388
2015			1.	Peptic ulcer disease		297.021	278.225	322.924		176.422	120.6		3.86701	1.80088	102.083	54.999	134.272
2015			2.	Cirrhosis of the liver		793.06	715.307	902.487		512.516	280.544		17.519	6.84998	373.919	176.262	218.51
2015		J.	Genitourinary diseases			1026.03	995.304	1070.19		551.358	474.67		13.9651	8.09593	255.996	196.128	551.844
2015			1.	Nephritis and nephrosis		816.141	790.356	852.913		425.395	390.746		11.6097	7.39686	218.108	162.071	416.957
2015			2.	Benign prostatic hypertrophy		44.3121	44.4154	44.6037		44.3121	0		0	0	7.24953	7.58846	29.4741
2015		K.	Skin diseases			88.4356	86.3218	90.5452		33.9861	54.4495		1.48847	0.673371	20.8657	13.2511	52.157
2015		L.	Musculoskeletal diseases			126.51	122.98	131.232		46.5228	79.9876		1.5313	1.78727	30.5849	17.2255	75.3815
2015			1.	Rheumatoid arthritis		30.0365	29.3269	31.1035		9.13082	20.9056		0.0189395	0.0840141	6.04169	5.70878	18.183
2015			2.	Osteoarthritis		6.14574	6.03138	6.25957		2.25574	3.89		0.0106504	0.00122806	0.311199	0.422103	5.40055
2015		M.	Congenital anomalies			409.899	377.798	448.861		214.103	195.796		350.021	15.3913	34.4361	3.58805	6.46336
2015		N.	Oral conditions			1.85786	1.77869	1.93269		0.901443	0.956421		0.0756539	0.0681684	0.699217	0.233882	0.780943
2015	III.	Injuries				6040.12	6013.87	6202.21		4028.39	2011.73		298.745	398.657	3899.32	553.564	889.84
2015		A.	Unintentional injuries			4109.81	4118.37	4216.43		2644.29	1465.53		283.243	361.894	2370.24	384.35	710.089
2015			1.	Road traffic accidents		1641.51	1707.79	1550.96		1190.3	451.219		64.7174	173.624	1125.77	132.526	144.876
2015			2.	Poisonings		339.996	332.504	381.075		204.472	135.524		14.8085	17.1922	209.502	56.5108	41.9824
2015			3.	Falls		482.769	479.856	494.453		278.317	204.452		15.5038	17.8328	147.811	57.6683	243.953
2015			4.	Fires		333.198	330.904	354.051		127.359	205.839		41.7441	33.7044	194.355	22.2575	41.1368
2015			5.	Drownings		350.615	333.703	392.917		241.271	109.344		49.0639	57.9286	183.24	22.8028	37.5796
2015			6.	Other unintentional injuries		961.723	933.608	1042.97		602.574	359.149		97.4053	61.612	509.56	92.5846	200.561
2015		B.	Intentional injuries			1930.31	1895.5	1985.78		1384.1	546.206		15.5016	36.7624	1529.08	169.214	179.751
2015			1.	Self-inflicted injuries		1004.33	1009.35	1028.64		624.361	379.97		0.133608	13.5871	740.222	116.381	134.008
2015			2.	Violence		679.927	670.962	707.022		540.161	139.766		14.1463	19.7388	572.756	38.2092	35.077
2015			3.	War		230.45	199.37	234.051		207.092	23.3587		0.443165	2.80117	204.927	13.1985	9.08092
2030	Population (millions)					7917.12	8067.6	7750.33		3847.91	4069.21		629.371	1269.43	4825.63	645.856	546.827
2030		All Causes				73247.8	64918.9	80747.4		37548.3	35699.5		5615.58	989.657	20670.6	11174.6	34797.3
2030	I.	Communicable, maternal, perinatal and nutritional conditions				15535.1	9209.06	19811.5		8290.95	7244.16		4809.66	419.463	7601.68	816.629	1887.68
2030		A.	Infectious and parasitic diseases			10821.7	6025.11	13340.3		5907.3	4914.38		2347.95	289.525	6963.06	554.316	666.829
2030			1.	Tuberculosis		618.124	302.693	1086.67		403.697	214.427		20.3417	14.2485	437.821	75.7852	69.9272
2030			2.	STDs excluding HIV		128.712	69.6808	203.329		75.2573	53.4546		29.0968	0.00841075	71.4274	12.1036	16.0756
2030			3.	HIV/AIDS		6500.79	3732.91	6570.34		3516.98	2983.81		106.025	150.164	5905.77	300.683	38.1459
2030			4.	Diarrhoeal diseases		898.39	465.712	1408.51		488.023	410.367		718.098	2.00587	36.6574	21.927	119.702
2030			5.	Childhood-cluster diseases		519.595	250.151	832.337		276.588	243.007		484.906	26.697	5.74631	0.671891	1.5739
2030				a.	Pertussis	136.378	66.3125	220.77		72.848	63.53		136.377	0.000384122	0.000647646	0	0
2030				d.	Measles	285.085	135.904	451.494		151.326	133.759		259.786	24.6191	0.679236	0.000375814	0
2030				e.	Tetanus	95.5872	46.4661	156.052		50.9861	44.601		86.9647	1.95411	4.94881	0.585091	1.13449
2030			6.	Meningitis		69.9459	39.5145	117.02		40.8606	29.0853		17.7791	8.40942	22.1638	5.4558	16.1379
2030			7.	Hepatitis B and C		85.9607	53.7381	133.096		56.9525	29.0082		6.43848	3.85026	42.9329	10.8035	21.9356
2030			8.	Malaria		639.978	322	938.248		333.556	306.422		550.457	6.43718	50.934	10.5133	21.6364
2030			9.	Tropical-cluster diseases		110.367	60.7813	173.246		70.0497	40.3168		4.07346	13.9126	63.3363	13.0871	15.9571
2030			10.	Leprosy		4.45325	2.86333	6.4045		3.30634	1.14691		0.133269	0.0192585	1.47347	0.849034	1.97822
2030			11.	Dengue		4.70388	2.66175	8.24186		2.37801	2.32587		0.612699	1.75736	0.865162	0.291451	1.1772
2030			12.	Japanese encephalitis		4.31846	2.40621	8.20903		2.71563	1.60283		0.775514	0.322717	2.46781	0.226636	0.525782
2030			13.	Trachoma		0.110864	0.0798738	0.153879		0.110864	0		0.013201	0.00055704	0.0268855	0	0.0702208
2030			14.	Intestinal nematode infections		5.51757	2.9988	9.03953		3.07446	2.44311		0.418492	1.3889	1.82444	0.690558	1.19519
2030		B.	Respiratory infections			2617.23	1690.43	3664.8		1361.99	1255.24		790.152	115.365	326.16	242.525	1143.03
2030		C.	Maternal conditions			258.634	107.967	487.97		0	258.634		0.000217086	0.0101028	258.614	0.000727897	0.00924515
2030		D.	Perinatal conditions			1576.82	1234.7	1917.82		895.958	680.858		1576.77	0.0199956	0.0221908	0.00344925	0.00383942
2030		E.	Nutritional deficiencies			260.748	150.857	400.623		125.697	135.051		94.7885	14.5428	53.8218	19.7832	77.8117
2030			1.	Protein-energy malnutrition		140.107	79.8088	209.285		73.2042	66.9029		67.5026	8.54726	13.1736	10.0095	40.8741
2030			2.	Iodine deficiency		2.97463	1.47086	5.05264		1.56094	1.4137		2.13374	0.415565	0.227399	0.0753525	0.122579
2030			3.	Vitamin A deficiency		15.1383	7.27959	23.4212		7.48467	7.65363		10.5974	1.76228	1.82029	0.478001	0.480304
2030			4.	Iron-deficiency anaemia		69.36	42.6633	110.601		28.3389	41.021		10.0568	3.25308	33.7564	6.20413	16.0895
2030	II.	Noncommunicable diseases				50623.9	48527.4	53632.2		24616.4	26007.4		524.011	149.164	8711.06	9632.3	31607.4
2030		A.	Malignant neoplasms			11485	11324.6	11190.5		6269.62	5215.36		37.4455	47.544	2655.94	2993.06	5750.99
2030			1.	Mouth and oropharynx cancers		546.109	516.684	541.16		349.019	197.09		0.557954	0.743248	155.435	163.617	225.755
2030			2.	Oesophagus cancer		766.364	754.159	726.849		458.184	308.179		0.0850745	0.132032	157.204	245.808	363.134
2030			3.	Stomach cancer		1389.24	1396.07	1297.92		827.074	562.17		0.127545	0.472193	276.916	356.546	755.183
2030			4.	Colon and rectum cancers		907.835	916.681	848.028		467.685	440.15		0.0429938	0.279598	156.133	193.734	557.645
2030			5.	Liver cancer		975.216	970.72	938.602		651.576	323.64		1.54713	1.11169	299.079	277.656	395.822
2030			6.	Pancreas cancer		322.647	324.91	307.272		165.191	157.456		0.0123828	0.0630243	57.6175	74.666	190.288
2030			7.	Trachea, bronchus, lung cancers		2242.22	2181.46	2324.98		1543.48	698.732		0	0	476.97	722.229	1043.02
2030			8.	Melanoma and other skin cancers		95.8743	96.1629	91.9652		49.8846	45.9897		0.0855372	0.172329	21.3041	19.502	54.8104
2030			9.	Breast cancer		714.197	685.86	705.263		3.37156	710.826		0.0287343	0.0972237	252.224	168.124	293.723
2030			10.	Cervix uteri cancer		434.83	406.85	431.231		0	434.83		0.0127968	0.0597025	155.69	125.598	153.47
2030			11.	Corpus uteri cancer		104.104	103.681	101.004		0	104.104		0.0279668	0.0492342	20.0551	24.3243	59.6472
2030			12.	Ovary cancer		192.192	180.962	188.522		0	192.192		0.0669871	0.606053	55.0568	48.1144	88.3481
2030			13.	Prostate cancer		465.299	483.024	430.246		465.299	0		0.0230952	0.0491916	18.5523	73.4279	373.246
2030			14.	Bladder cancer		306.782	309.226	287.829		209.667	97.1157		0.679919	0.282932	37.2272	61.8091	206.783
2030			15.	Lymphomas, multiple myeloma		525.782	505.864	515.733		256.845	268.937		6.60921	15.649	144.201	111.439	247.883
2030			16.	Leukaemia		348.718	345.035	340.415		192.044	156.674		13.1432	17.7932	113.309	60.7422	143.73
2030		B.	Other neoplasms			232.261	231.556	225.957		113.33	118.931		4.38381	4.71469	61.2746	39.2238	122.664
2030		C.	Diabetes mellitus			2206.56	2018.92	2340.75		908.525	1298.03		1.88499	1.72641	443.89	511.338	1247.72
2030		D.	Endocrine disorders			313.469	297.141	333.902		138.076	175.394		18.9345	4.02716	73.816	43.7507	172.941
2030		E.	Neuropsychiatric conditions			1627.34	1589.37	1686.82		816.252	811.093		30.2408	22.6453	382.322	122.009	1070.13
2030			1.	Unipolar depressive disorders		19.9569	19.1549	21.2152		8.99493	10.962		0.0136581	0.00690405	12.41	3.54502	3.98138
2030			2.	Bipolar disorder		0.968329	0.92604	1.0279		0.243868	0.724461		0.00626482	0.00267141	0.221593	0.102199	0.635601
2030			3.	Schizophrenia		33.0013	32.0366	35.0539		15.412	17.5894		0.023498	0.0347106	18.3441	4.53387	10.0652
2030			4.	Epilepsy		139.276	126.747	154.367		80.7606	58.515		12.9992	10.2483	81.7679	12.2432	22.0169
2030			5.	Alcohol use disorders		103.21	98.0072	111.441		88.1184	15.0915		0.052755	0.0265952	67.3635	19.8465	15.9205
2030			6.	Alzheimer and other dementias		671.372	673.577	674.1		255.429	415.943		0.888725	0.324888	9.61736	19.4432	641.098
2030			7.	Parkinson disease		165.418	165.845	167.199		85.9191	79.499		0.207573	0.142134	4.00064	10.4781	150.59
2030			8.	Multiple sclerosis		17.0118	15.9241	18.5186		6.90155	10.1103		0.0318215	0.12361	7.02148	3.59658	6.23832
2030			9.	Drug use disorders		106.515	101.168	117.01		88.2079	18.3071		0.0164274	0.0133692	102.019	2.60128	1.86483
2030			10.	Post-traumatic stress disorder		0.089199	0.0861727	0.0936656		0.047319	0.04188		0.000541527	0.000397983	0.0286691	0.0165761	0.0430143
2030			11.	Obsessive-compulsive disorder		0	0	0		0	0		0	0	0	0	0
2030			12.	Panic disorder		0	0	0		0	0		0	0	0	0	0
2030			13.	Insomnia (primary)		0	0	0		0	0		0	0	0	0	0
2030			14.	Migraine		0	0	0		0	0		0	0	0	0	0
2030		F.	Sense organ diseases			5.15456	5.07472	5.24571		2.51331	2.64126		0.0949069	0.0724425	0.851361	0.609443	3.52641
2030			1.	Glaucoma		0.153618	0.150479	0.158259		0.107293	0.0463249		0.00197674	0	0.0414577	0.0379939	0.0721898
2030			2.	Cataracts		0	0	0		0	0		0	0	0	0	0
2030			3.	Vision disorders, age-related		0	0	0		0	0		0	0	0	0	0
2030			4.	Hearing loss, adult onset		0	0	0		0	0		0	0	0	0	0
2030		G.	Cardiovascular diseases			23312	22656.5	25217		10433.7	12878.3		69.8939	22.4883	3044.46	3988.22	16187
2030			1.	Rheumatic heart disease		386.192	358.403	451.703		159.888	226.304		10.3332	5.37748	127.239	72.347	170.896
2030			2.	Hypertensive heart disease		1337.89	1279.7	1472.2		584.61	753.281		1.34614	0.855318	168.756	231.893	935.041
2030			3.	Ischaemic heart disease		9843.47	9513.26	10662.6		4770.34	5073.14		4.46644	2.11713	1467.19	1944.67	6425.02
2030			4.	Cerebrovascular disease		7787.66	7664.64	8366.18		3323.49	4464.16		10.9091	5.49809	787.149	1296.49	5687.61
2030			5.	Inflammatory heart diseases		539.104	518.193	594.312		252.609	286.495		12.1546	2.26355	105.198	80.3618	339.126
2030		H.	Respiratory diseases			7251.79	6612.46	7920.16		3752.06	3499.73		48.0614	12.4969	977.305	1225.8	4988.13
2030			1.	Chronic obstructive pulmonary disease		5684.4	5172.41	6230.62		2943.73	2740.67		2.7925	0.43539	626.116	1003.32	4051.73
2030			2.	Asthma		359.647	320.144	401.802		186.242	173.405		3.06286	4.74514	160.39	55.0276	136.421
2030		I.	Digestive diseases			2325.24	2020.06	2714.32		1243.28	1081.96		34.0116	14.6477	722.098	422.475	1132.01
2030			1.	Peptic ulcer disease		346.57	312.697	393.152		198.868	147.702		2.1565	0.941667	99.6054	63.1379	180.728
2030			2.	Cirrhosis of the liver		821.69	678.382	1026.13		520.299	301.392		10.694	3.86265	345.437	181.982	279.715
2030		J.	Genitourinary diseases			1271.53	1236.69	1335.59		669.398	602.13		9.36063	5.12937	263.041	244.589	749.409
2030			1.	Nephritis and nephrosis		1007.02	976.32	1062.77		512.581	494.437		7.89121	4.71848	225.391	202.356	566.661
2030			2.	Benign prostatic hypertrophy		56.2738	58.402	54.4489		56.2738	0		0	0	8.57725	9.58395	38.1126
2030		K.	Skin diseases			116.973	114.996	119.739		43.3551	73.6177		1.02654	0.518541	26.0002	17.5268	71.9006
2030		L.	Musculoskeletal diseases			153.284	148.135	160.489		55.2066	98.077		0.976926	1.50634	30.2344	19.485	101.081
2030			1.	Rheumatoid arthritis		37.9454	36.8658	39.7776		11.5295	26.4159		0.0127827	0.0666893	6.11371	6.48192	25.2703
2030			2.	Osteoarthritis		8.21784	8.11602	8.33126		2.9805	5.23734		0.00686945	0.00101738	0.325944	0.485647	7.39836
2030		M.	Congenital anomalies			321.071	269.886	379.399		170.094	150.977		267.645	11.5981	29.1123	3.90911	8.80663
2030		N.	Oral conditions			2.1833	2.0643	2.31719		1.0157	1.1676		0.0506336	0.0483507	0.717445	0.30194	1.06493
2030	III.	Injuries				7088.77	7182.38	7303.79		4640.92	2447.85		281.911	421.03	4357.88	725.68	1302.26
2030		A.	Unintentional injuries			4796.29	4967.44	4919.67		3002.27	1794.03		266.121	383.71	2607.29	498.522	1040.65
2030			1.	Road traffic accidents		2112.09	2355.01	1930.42		1514.32	597.774		77.2539	229.412	1410.04	180.855	214.536
2030			2.	Poisonings		351.851	339.389	417.628		193.976	157.875		13.3861	15.0351	190.501	70.4851	62.4433
2030			3.	Falls		601.001	609.38	605.763		315.381	285.621		13.4104	15.5808	143.267	74.9946	353.749
2030			4.	Fires		353.154	348.554	389.56		131.486	221.668		40.2249	32.1864	189.362	29.7208	61.6602
2030			5.	Drownings		347.225	324.87	412.863		235.426	111.8		39.5362	42.5272	181.37	28.4616	55.3299
2030			6.	Other unintentional injuries		1030.97	990.238	1163.44		611.681	419.288		82.3095	48.9679	492.756	114.006	292.93
2030		B.	Intentional injuries			2292.48	2214.94	2384.11		1638.65	653.829		15.7902	37.3204	1750.59	227.158	261.615
2030			1.	Self-inflicted injuries		1144.99	1168.7	1172.6		697.432	447.556		0.139719	12.9806	779.777	155.682	196.409
2030			2.	Violence		808.838	798.63	873.687		640.432	168.406		14.3958	20.3512	672.502	51.2994	50.2892
2030			3.	War		320.034	228.335	318.435		286.106	33.9276		0.488046	3.40601	285.426	18.1241	12.5892

## Sheet: East Asia and Pacific
Deaths by cause, scenario, sex and age for the years 2002, 2015 and 2030
Source: Mathers CD, Loncar D (2006). Projections of global mortality and burden of disease from 2002 to 2030.
East Asia and Pacific
						Total deaths ('000)				Baseline deaths ('000)			Baseline projections ('000) by age group
Year		Cause				Baseline	Optimistic	Pessimistic		Male	Female		0-4	5-14	15-59	60-69	70+
2002	Population (millions)					1866.12	1866.12	1866.12		950.425	915.694		152.932	331.794	1204.2	104.294	72.8992
2002		All Causes				13304	13304	13304		7081.05	6222.99		1329.9	209.248	3687.98	2340.17	5736.74
2002	I.	Communicable, maternal, perinatal and nutritional conditions				2471.93	2471.93	2471.93		1346.34	1125.59		1024.9	66.2794	689.319	218.171	473.256
2002		A.	Infectious and parasitic diseases			1302.47	1302.47	1302.47		812.361	490.107		362.765	37.1113	544.893	148.965	208.733
2002			1.	Tuberculosis		508.677	508.677	508.677		331.115	177.562		3.49584	5.21492	259.271	114.376	126.319
2002			2.	STDs excluding HIV		8.8961	8.8961	8.8961		4.39685	4.49925		1.31381	0.00349483	3.60265	1.61167	2.36447
2002			3.	HIV/AIDS		148.415	148.415	148.415		121.492	26.9233		5.15741	1.16957	139.611	2.14874	0.328824
2002			4.	Diarrhoeal diseases		221.057	221.057	221.057		115.983	105.074		194.935	1.56564	7.93264	3.97021	12.6528
2002			5.	Childhood-cluster diseases		95.9786	95.9786	95.9786		48.0985	47.88		74.255	15.7279	5.71112	0.122069	0.162417
2002				a.	Pertussis	5.12442	5.12442	5.12442		2.53321	2.59121		5.12442	0	0	0	0
2002				d.	Measles	70.0262	70.0262	70.0262		35.0131	35.0131		50.3692	15.1271	4.52991	0	0
2002				e.	Tetanus	20.2256	20.2256	20.2256		10.1135	10.1121		18.2631	0.553239	1.12601	0.120959	0.162313
2002			6.	Meningitis		33.301	33.301	33.301		16.56	16.7411		13.0286	1.89904	13.4648	1.72934	3.17927
2002			7.	Hepatitis B and C		48.0547	48.0547	48.0547		39.5261	8.52855		1.38319	0.154241	36.4315	5.95431	4.13137
2002			8.	Malaria		28.7678	28.7678	28.7678		19.7869	8.98093		25.8617	0.343127	1.53774	0.341719	0.683549
2002			9.	Tropical-cluster diseases		5.30759	5.30759	5.30759		3.90122	1.40636		0.137017	0.360814	2.79094	1.1203	0.898514
2002			10.	Leprosy		1.92927	1.92927	1.92927		1.66719	0.262082		0.0107712	0.0041956	0.64296	0.616647	0.654695
2002			11.	Dengue		7.58532	7.58532	7.58532		3.17166	4.41366		2.09977	3.45423	1.40801	0.221516	0.401785
2002			12.	Japanese encephalitis		3.69858	3.69858	3.69858		1.94822	1.75035		2.44415	0.12686	0.970426	0.0588535	0.0982876
2002			13.	Trachoma		0.0685985	0.0685985	0.0685985		0.0685985	0		0.00123484	0	0.00358678	0	0.0637769
2002			14.	Intestinal nematode infections		1.9715	1.9715	1.9715		0.972407	0.999093		1.0122	0.356609	0.298452	0.149206	0.15503
2002		B.	Respiratory infections			595.899	595.899	595.899		262.397	333.502		172.363	26.6681	84.372	62.2895	250.207
2002		C.	Maternal conditions			36.0645	36.0645	36.0645		0	36.0645		0	0	36.0645	0	0
2002		D.	Perinatal conditions			475.789	475.789	475.789		247.537	228.252		475.787	0.00154536	0	0	0
2002		E.	Nutritional deficiencies			61.7058	61.7058	61.7058		24.0411	37.6647		13.9863	2.49847	23.9891	6.91596	14.316
			1.	Protein-energy malnutrition		26.348	26.348	26.348		13.8398	12.5081		11.5125	1.66171	5.08921	2.2659	5.81865
			2.	Iodine deficiency		0.10161	0.10161	0.10161		0.06668	0.0349303		0.0480301	0.0463422	0.00214111	0.00477469	0.000322174
			3.	Vitamin A deficiency		0.208583	0.208583	0.208583		0.16502	0.0435627		0.0469151	0.10493	0.0567374	0	0
			4.	Iron-deficiency anaemia		25.8036	25.8036	25.8036		6.5695	19.2341		1.47683	0.576749	17.6842	3.44568	2.62017
2002	II.	Noncommunicable diseases				9449.68	9449.68	9449.68		4852.3	4597.38		226.845	48.9885	2089.21	1991.75	5092.88
2002		A.	Malignant neoplasms			2189.4	2189.4	2189.4		1290.81	898.594		11.4459	14.1825	791.878	596.364	775.53
2002			1.	Mouth and oropharynx cancers		67.8208	67.8208	67.8208		45.7618	22.059		0.0524534	0.0627808	31.2338	17.426	19.0458
2002			2.	Oesophagus cancer		239.266	239.266	239.266		149.877	89.389		8.29336e-05	0.0001345	69.2119	77.2403	92.8137
2002			3.	Stomach cancer		452.239	452.239	452.239		284.374	167.864		0.0286323	0.0653651	145.459	120.098	186.588
2002			4.	Colon and rectum cancers		162.957	162.957	162.957		84.7667	78.1901		0.00507157	0.0231541	53.0408	43.0442	66.8435
2002			5.	Liver cancer		381.232	381.232	381.232		274.905	106.326		0.81384	0.417425	175.354	101.88	102.767
2002			6.	Pancreas cancer		38.3119	38.3119	38.3119		22.0808	16.2311		0.0111017	0.0620264	14.0556	9.92955	14.2536
2002			7.	Trachea, bronchus, lung cancers		395.546	395.546	395.546		267.441	128.105		0.163924	0.524155	109.774	130.841	154.243
2002			8.	Melanoma and other skin cancers		4.63122	4.63122	4.63122		2.32655	2.30467		0.00777599	0.0110044	1.53567	1.26685	1.80992
2002			9.	Breast cancer		94.7634	94.7634	94.7634		0.0509187	94.7125		0.00828419	3.8882e-06	55.2329	19.2392	20.2831
2002			10.	Cervix uteri cancer		47.7508	47.7508	47.7508		0	47.7508		0.00883038	6.7042e-05	19.6576	12.6571	15.4273
2002			11.	Corpus uteri cancer		7.97072	7.97072	7.97072		0	7.97072		0.000309674	0.000673998	3.22657	2.0446	2.69857
2002			12.	Ovary cancer		25.5436	25.5436	25.5436		0	25.5436		0.0146231	0.115672	12.757	5.79169	6.86463
2002			13.	Prostate cancer		16.2052	16.2052	16.2052		16.2052	0		1.7527e-06	4.793e-06	0.983391	3.9109	11.3109
2002			14.	Bladder cancer		30.3647	30.3647	30.3647		21.9484	8.41628		0.0114582	0.0147	3.86948	7.75798	18.7111
2002			15.	Lymphomas, multiple myeloma		42.4547	42.4547	42.4547		24.4931	17.9615		0.689638	1.92436	20.2668	8.29178	11.2821
2002			16.	Leukaemia		76.4338	76.4338	76.4338		41.842	34.5918		6.065	8.95748	38.5173	9.67177	13.2223
2002		B.	Other neoplasms			20.8869	20.8869	20.8869		9.58142	11.3055		1.01324	0.736881	9.27476	3.88571	5.9763
2002		C.	Diabetes mellitus			238.98	238.98	238.98		99.5581	139.422		0.288458	0.388031	56.185	68.7387	113.38
2002		D.	Endocrine disorders			60.8026	60.8026	60.8026		25.1234	35.6792		16.8878	2.39661	19.4361	5.42628	16.6558
2002		E.	Neuropsychiatric conditions			190.557	190.557	190.557		92.787	97.7699		4.64292	3.1885	58.4712	20.1262	104.128
2002			1.	Unipolar depressive disorders		1.21338	1.21338	1.21338		0.513272	0.700105		3.0786e-05	2.5044e-06	0.958567	0.243036	0.011741
2002			2.	Bipolar disorder		0.174477	0.174477	0.174477		0.0238005	0.150676		0.00761316	1.8025e-06	0.108043	0.00181783	0.0570013
2002			3.	Schizophrenia		5.8589	5.8589	5.8589		2.65474	3.20416		0.00304763	0.0396524	4.21846	0.587758	1.00999
2002			4.	Epilepsy		23.271	23.271	23.271		12.8817	10.3893		2.46703	1.71939	16.5091	1.01235	1.56319
2002			5.	Alcohol use disorders		12.5052	12.5052	12.5052		10.8442	1.66102		0.00642391	0.000522582	9.29956	2.02824	1.1705
2002			6.	Alzheimer and other dementias		60.4899	60.4899	60.4899		21.7797	38.7102		0.515958	0.167937	4.30108	4.4742	51.0308
2002			7.	Parkinson disease		26.8643	26.8643	26.8643		11.5311	15.3332		0.0305473	0.00614549	1.6977	2.57335	22.5565
2002			8.	Multiple sclerosis		1.34044	1.34044	1.34044		0.402084	0.938361		0.00352417	0.00806266	0.765899	0.306308	0.256651
2002			9.	Drug use disorders		7.45037	7.45037	7.45037		6.03043	1.41994		0.000266217	5.54327e-05	7.21715	0.14859	0.0843113
2002			10.	Post-traumatic stress disorder		0.0161351	0.0161351	0.0161351		0.00731401	0.00882112		5.1106e-06	4.157e-07	0.00793427	0.00440823	0.0037871
2002			11.	Obsessive-compulsive disorder		0	0	0		0	0		0	0	0	0	0
2002			12.	Panic disorder		0	0	0		0	0		0	0	0	0	0
2002			13.	Insomnia (primary)		0	0	0		0	0		0	0	0	0	0
2002			14.	Migraine		0	0	0		0	0		0	0	0	0	0
2002		F.	Sense organ diseases			0.463277	0.463277	0.463277		0.243565	0.219712		0.0374747	0.0342993	0.195591	0.0510826	0.14483
2002			1.	Glaucoma		0.014865	0.014865	0.014865		0.014865	0		0.00402581	0	0.0086417	0.00219753	0
2002			2.	Cataracts		0	0	0		0	0		0	0	0	0	0
2002			3.	Vision disorders, age-related		0	0	0		0	0		0	0	0	0	0
2002			4.	Hearing loss, adult onset		0	0	0		0	0		0	0	0	0	0
2002		G.	Cardiovascular diseases			4116.27	4116.27	4116.27		2028.92	2087.35		11.415	7.88581	718.449	855.615	2522.9
2002			1.	Rheumatic heart disease		123.591	123.591	123.591		48.1151	75.4756		1.4322	2.03402	51.7402	24.7522	43.632
2002			2.	Hypertensive heart disease		342.073	342.073	342.073		170.153	171.92		0.30915	0.200099	61.8039	81.72	198.04
2002			3.	Ischaemic heart disease		1182.56	1182.56	1182.56		606.572	575.986		1.23933	0.732545	227.467	262.713	690.406
2002			4.	Cerebrovascular disease		1957.79	1957.79	1957.79		985.342	972.451		2.64722	1.41055	285.928	409.395	1258.41
2002			5.	Inflammatory heart diseases		83.5834	83.5834	83.5834		36.5777	47.0057		1.20012	0.551456	13.7417	12.2266	55.8635
2002		H.	Respiratory diseases			1712.18	1712.18	1712.18		798.943	913.238		11.2894	2.55125	143.634	285.445	1269.26
2002			1.	Chronic obstructive pulmonary disease		1461.11	1461.11	1461.11		672.014	789.094		0.370822	0.0646328	89.8546	247.114	1123.7
2002			2.	Asthma		57.0192	57.0192	57.0192		28.7063	28.313		1.64371	1.23296	31.4321	10.1939	12.5166
2002		I.	Digestive diseases			521.122	521.122	521.122		298.577	222.545		56.6481	5.92577	183.901	96.9779	177.669
2002			1.	Peptic ulcer disease		96.2553	96.2553	96.2553		55.2263	41.029		2.11351	0.524932	32.5975	21.7059	39.3135
2002			2.	Cirrhosis of the liver		197.268	197.268	197.268		128.134	69.134		2.73529	1.04413	96.1605	43.6554	53.673
2002		J.	Genitourinary diseases			237.287	237.287	237.287		126.057	111.231		3.50203	3.59015	84.5604	52.9612	92.6734
2002			1.	Nephritis and nephrosis		189.121	189.121	189.121		96.096	93.0253		2.58871	3.41665	72.0298	41.981	69.1051
2002			2.	Benign prostatic hypertrophy		8.66173	8.66173	8.66173		8.66173	0		0	0	0.981896	1.68195	5.99788
2002		K.	Skin diseases			8.81066	8.81066	8.81066		3.79277	5.01788		0.576823	0.207131	2.76573	1.37042	3.89056
2002		L.	Musculoskeletal diseases			23.2263	23.2263	23.2263		9.22888	13.9975		0.59007	0.531215	8.15625	4.12844	9.82037
2002			1.	Rheumatoid arthritis		6.50219	6.50219	6.50219		2.49154	4.01065		0.00602765	0.0137688	1.98558	1.54024	2.95658
2002			2.	Osteoarthritis		0.600728	0.600728	0.600728		0.338409	0.262318		0.00378424	3.10033e-05	0.089634	0.0701017	0.437177
2002		M.	Congenital anomalies			129.299	129.299	129.299		68.4945	60.8047		108.485	7.30786	12.0971	0.613965	0.794886
2002		N.	Oral conditions			0.395535	0.395535	0.395535		0.194889	0.200646		0.0223398	0.0625196	0.206644	0.0453865	0.0586453
2002	III.	Injuries				1382.43	1382.43	1382.43		882.409	500.023		78.1537	93.98	909.446	130.252	170.6
2002		A.	Unintentional injuries			934.799	934.799	934.799		615.772	319.028		76.4756	86.9639	572.513	80.3513	118.495
2002			1.	Road traffic accidents		361.644	361.644	361.644		263.498	98.146		7.20622	19.5131	276.04	31.5998	27.2852
2002			2.	Poisonings		83.7341	83.7341	83.7341		51.1981	32.536		4.88897	5.44008	50.549	11.7167	11.1394
2002			3.	Falls		123.809	123.809	123.809		77.082	46.7272		3.78727	4.9912	56.2289	15.2267	43.575
2002			4.	Fires		35.8729	35.8729	35.8729		14.4946	21.3784		2.93172	2.77102	21.7329	2.70399	5.73327
2002			5.	Drownings		142.288	142.288	142.288		90.5674	51.721		27.495	42.5157	55.5185	6.37413	10.385
2002			6.	Other unintentional injuries		187.451	187.451	187.451		118.932	68.519		30.1664	11.7328	112.444	12.7299	20.3775
2002		B.	Intentional injuries			447.633	447.633	447.633		266.637	180.996		1.67811	7.01611	336.933	49.9006	52.1049
2002			1.	Self-inflicted injuries		324.933	324.933	324.933		165.029	159.904		0	4.11346	230.379	42.8155	47.6252
2002			2.	Violence		103.557	103.557	103.557		84.6417	18.9153		1.59048	2.62407	89.6476	5.9063	3.78853
2002			3.	War		16.2218	16.2218	16.2218		14.6236	1.59819		0.0343131	0.21149	14.4349	0.981723	0.559388
2015	Population (millions)					2038.19	2044.07	2028.89		1019.14	1019.05		151.355	296.994	1331.81	156.57	101.459
2015		All Causes				15344	14456.8	16557		8344.38	6999.62		626.396	115.998	4081.27	2817.83	7702.5
2015	I.	Communicable, maternal, perinatal and nutritional conditions				1746.12	1439.95	2208.88		1043.73	702.391		428.868	25.9916	743.303	128.746	419.212
2015		A.	Infectious and parasitic diseases			1008.8	829.194	1317.7		689.635	319.167		115.777	15.811	661.209	77.953	138.052
2015			1.	Tuberculosis		182.808	153.271	291.265		115.427	67.3816		1.00388	1.47314	91.1596	43.0219	46.1495
2015			2.	STDs excluding HIV		6.50567	4.93225	8.05962		3.50618	2.9995		0.629643	0.0014441	2.2755	1.04512	2.55397
2015			3.	HIV/AIDS		516.878	451.274	613.608		397.886	118.992		4.81882	3.37145	494.004	13.0993	1.58421
2015			4.	Diarrhoeal diseases		75.9864	52.5355	110.822		40.5316	35.4548		53.8323	0.64476	4.59834	2.81171	14.0994
2015			5.	Childhood-cluster diseases		30.7477	18.2588	43.6113		15.9279	14.8198		22.7751	5.34371	2.36304	0.0842611	0.181626
2015				a.	Pertussis	1.59168	0.99813	2.53003		0.83088	0.760803		1.59168	0	0	0	0
2015				d.	Measles	22.7158	13.2486	31.6966		11.7509	10.9649		15.7394	5.15427	1.82216	0	0
2015				e.	Tetanus	6.20497	3.86611	9.05307		3.17764	3.02733		5.25214	0.17275	0.515145	0.0834473	0.181487
2015			6.	Meningitis		16.9517	12.0808	22.8398		8.65892	8.29274		5.08727	0.693911	6.57479	1.16961	3.42608
2015			7.	Hepatitis B and C		26.5663	20.5747	36.2192		21.5362	5.03009		0.571737	0.0584645	17.6915	3.85878	4.38575
2015			8.	Malaria		12.1899	7.50354	16.8108		8.59389	3.59597		10.1273	0.127705	0.918164	0.256266	0.760401
2015			9.	Tropical-cluster diseases		3.46333	2.71793	4.52042		2.42617	1.03715		0.068386	0.162876	1.56573	0.719216	0.947117
2015			10.	Leprosy		1.53941	1.18599	1.81407		1.36826	0.171144		0.00525203	0.00151691	0.428024	0.465884	0.638731
2015			11.	Dengue		3.56482	2.15089	4.41451		1.51849	2.04633		0.764511	1.39368	0.713474	0.163189	0.529961
2015			12.	Japanese encephalitis		1.13935	0.823939	1.80979		0.620018	0.519335		0.485174	0.0377349	0.476049	0.0387093	0.101686
2015			13.	Trachoma		0.0648657	0.056874	0.0714095		0.0648657	0		0.000593818	0	0.00260524	0	0.0616667
2015			14.	Intestinal nematode infections		0.894089	0.652648	1.22993		0.438698	0.455391		0.335465	0.11353	0.144076	0.104879	0.196139
2015		B.	Respiratory infections			422.502	355.233	498.363		202.088	220.414		43.7543	9.1537	55.4141	46.8946	267.285
2015		C.	Maternal conditions			13.3207	8.07484	19.0848		0	13.3207		0	0	13.3207	0	0
2015		D.	Perinatal conditions			264.46	219.733	327.163		138.022	126.438		264.46	0.000598771	0	0	0
2015		E.	Nutritional deficiencies			37.0357	27.7198	46.5688		13.9842	23.0515		4.87728	1.02626	13.3585	3.89889	13.8748
2015			1.	Protein-energy malnutrition		14.2722	11.0224	17.9684		6.9858	7.28642		3.79398	0.66555	2.55879	1.20423	6.04967
2015			2.	Iodine deficiency		0.0465871	0.0296546	0.0672448		0.0295428	0.0170442		0.022789	0.0190839	0.00138981	0.00293362	0.000390774
2015			3.	Vitamin A deficiency		0.102933	0.0686241	0.14139		0.0848103	0.0181226		0.02216	0.0425894	0.0381834	0	0
2015			4.	Iron-deficiency anaemia		15.3658	10.8646	19.551		4.31455	11.0513		0.601761	0.253917	9.99637	1.97901	2.53475
2015	II.	Noncommunicable diseases				12058	11537.7	12714.4		6333.68	5724.28		143.445	30.5834	2354.09	2501.5	7028.35
2015		A.	Malignant neoplasms			3065.82	3044.91	3009.78		1836.48	1229.34		10.1539	11.0667	994.441	876.417	1173.74
2015			1.	Mouth and oropharynx cancers		91.3269	90.4448	90.8818		60.8054	30.5216		0.0569611	0.0598871	38.7161	24.2103	28.2837
2015			2.	Oesophagus cancer		326.167	325.071	315.936		202.992	123.176		9.55267e-05	0.00012634	85.3293	109.79	131.048
2015			3.	Stomach cancer		618.741	616.893	598.864		392.229	226.512		0.0252689	0.0572509	175.675	169.379	273.604
2015			4.	Colon and rectum cancers		226.073	227.249	217.771		120.144	105.928		0.00523243	0.0235755	63.3508	59.2605	103.433
2015			5.	Liver cancer		500.59	496.556	494.161		359.819	140.772		0.714505	0.325395	209.968	142.445	147.138
2015			6.	Pancreas cancer		52.1253	52.1259	50.8534		30.3087	21.8166		0.00985135	0.0492994	17.1346	13.6144	21.3171
2015			7.	Trachea, bronchus, lung cancers		659.949	646.58	657.47		454.86	205.09		0	0	177.096	224.726	258.127
2015			8.	Melanoma and other skin cancers		6.36455	6.42679	6.27605		3.2625	3.10206		0.00734615	0.00916025	1.82377	1.68215	2.84213
2015			9.	Breast cancer		122.359	121.585	121.824		0.0746578	122.285		0.0087344	4.21672e-06	66.1192	26.9728	29.2585
2015			10.	Cervix uteri cancer		64.0517	63.2427	63.296		0	64.0517		0.00936635	6.37647e-05	24.2183	18.1861	21.6379
2015			11.	Corpus uteri cancer		10.9964	11.0996	10.8689		0	10.9964		0.000409951	0.000755628	4.02562	2.87995	4.0897
2015			12.	Ovary cancer		32.1783	31.9232	31.8682		0	32.1783		0.0146084	0.10506	14.4934	7.82118	9.744
2015			13.	Prostate cancer		25.6366	26.9095	24.6868		25.6366	0		3.48533e-06	4.95325e-06	1.36366	5.11476	19.1582
2015			14.	Bladder cancer		45.1502	45.7236	43.0952		33.121	12.0292		0.01165	0.0122605	4.99086	10.6122	29.5232
2015			15.	Lymphomas, multiple myeloma		54.301	54.3443	53.8666		31.2371	23.0639		0.653831	1.61194	23.6193	10.9599	17.4561
2015			16.	Leukaemia		86.3984	85.7402	86.1633		47.4561	38.9423		5.38225	7.10702	40.2644	13.5162	20.1286
2015		B.	Other neoplasms			26.7613	26.5997	26.4436		12.1848	14.5765		0.887219	0.567595	11.028	5.49229	8.78625
2015		C.	Diabetes mellitus			382.872	351.295	406.26		156.412	226.46		0.225294	0.260801	91.0502	104.775	186.56
2015		D.	Endocrine disorders			60.072	55.7358	64.8863		25.7575	34.3145		8.89826	1.49802	19.0956	6.6479	23.9322
2015		E.	Neuropsychiatric conditions			236.37	228.233	245.841		116.894	119.476		3.1898	2.23239	61.272	24.4799	145.196
2015			1.	Unipolar depressive disorders		1.52476	1.40821	1.57432		0.65294	0.87182		2.51768e-05	1.78779e-06	1.22592	0.281525	0.0172878
2015			2.	Bipolar disorder		0.206636	0.199454	0.220286		0.0270847	0.179552		0.00535484	1.28673e-06	0.130392	0.0020804	0.0688082
2015			3.	Schizophrenia		6.63755	6.32054	7.03732		2.93145	3.7061		0.00228473	0.0248085	4.56687	0.707772	1.33581
2015			4.	Epilepsy		21.0024	19.5013	22.8263		11.7448	9.25758		1.68324	1.17909	14.7891	1.23894	2.11195
2015			5.	Alcohol use disorders		13.9497	13.3323	14.7869		12.1917	1.75793		0.00525348	0.00037305	9.92902	2.49112	1.5239
2015			6.	Alzheimer and other dementias		81.8636	80.7101	84.473		32.0362	49.8273		0.354803	0.112238	4.52735	5.53086	71.3383
2015			7.	Parkinson disease		34.6928	34.3024	36.028		15.9026	18.7902		0.0223438	0.00461825	1.6944	3.19896	29.7725
2015			8.	Multiple sclerosis		1.5451	1.48867	1.64865		0.492262	1.05284		0.00244627	0.00575765	0.809726	0.381015	0.346159
2015			9.	Drug use disorders		8.66339	8.10048	9.0265		7.02645	1.63694		0.000217712	3.95711e-05	8.33999	0.206379	0.116766
2015			10.	Post-traumatic stress disorder		0.0237323	0.0223553	0.0240512		0.0125773	0.011155		4.17945e-06	2.96751e-07	0.0106481	0.00530523	0.00777447
2015			11.	Obsessive-compulsive disorder		0	0	0		0	0		0	0	0	0	0
2015			12.	Panic disorder		0	0	0		0	0		0	0	0	0	0
2015			13.	Insomnia (primary)		0	0	0		0	0		0	0	0	0	0
2015			14.	Migraine		0	0	0		0	0		0	0	0	0	0
2015		F.	Sense organ diseases			0.557785	0.515912	0.575532		0.304511	0.253275		0.0257488	0.0246128	0.227793	0.0626276	0.217003
2015			1.	Glaucoma		0.0166522	0.0150903	0.0172578		0.0166522	0		0.00265879	0	0.0113302	0.00266319	0
2015			2.	Cataracts		0	0	0		0	0		0	0	0	0	0
2015			3.	Vision disorders, age-related		0	0	0		0	0		0	0	0	0	0
2015			4.	Hearing loss, adult onset		0	0	0		0	0		0	0	0	0	0
2015		G.	Cardiovascular diseases			4813.93	4634.55	5210.81		2392.06	2421.87		9.5714	4.27219	710.59	906.212	3183.29
2015			1.	Rheumatic heart disease		121.833	114.776	138.928		49.1787	72.6547		1.17938	1.04816	41.7691	26.8426	50.9942
2015			2.	Hypertensive heart disease		397.607	375.665	431.575		203.95	193.657		0.263075	0.124816	59.2177	82.3663	255.635
2015			3.	Ischaemic heart disease		1396.43	1324.92	1503.54		715.37	681.056		1.09836	0.413668	240.132	286.581	868.2
2015			4.	Cerebrovascular disease		2283.58	2231.18	2477.13		1152.69	1130.89		2.2738	0.860355	279.889	428.953	1571.6
2015			5.	Inflammatory heart diseases		98.2989	95.4108	106.617		44.1279	54.171		0.98319	0.265499	13.1502	12.9397	70.9604
2015		H.	Respiratory diseases			2540.78	2345.23	2709.88		1270.14	1270.64		8.58236	1.83078	191.346	400.203	1938.82
2015			1.	Chronic obstructive pulmonary disease		2196.83	2026.79	2347.05		1087.22	1109.61		0.295608	0.0493346	128.618	350.149	1717.72
2015			2.	Asthma		71.5812	63.4715	77.0142		37.796	33.7852		1.294	0.883027	35.6385	13.3057	20.4599
2015		I.	Digestive diseases			524.685	468.546	602.419		305.165	219.52		24.5457	2.42219	174.012	105.502	218.203
2015			1.	Peptic ulcer disease		109.015	99.3212	120.878		64.3217	44.6934		1.17312	0.214393	31.9758	24.7227	50.9291
2015			2.	Cirrhosis of the liver		196.529	171.963	233.036		128.243	68.2861		1.69704	0.498974	89.2897	44.2395	60.8041
2015		J.	Genitourinary diseases			275.681	261.726	293.696		152.897	122.784		1.84491	1.60619	79.3014	64.2166	128.712
2015			1.	Nephritis and nephrosis		215.397	203.919	230.626		113.509	101.888		1.34489	1.51727	67.0552	50.8632	94.6164
2015			2.	Benign prostatic hypertrophy		12.4768	12.3258	12.6754		12.4768	0		0	0	1.16687	2.06354	9.24643
2015		K.	Skin diseases			11.4202	10.6841	11.7183		4.91055	6.50964		0.381377	0.141914	3.07379	1.63615	6.18696
2015		L.	Musculoskeletal diseases			27.7849	26.6938	29.1038		11.9079	15.8771		0.336487	0.364747	8.50526	5.0414	13.537
2015			1.	Rheumatoid arthritis		8.10666	7.86025	8.49476		3.27014	4.83652		0.004079	0.0103495	2.29102	1.91067	3.89055
2015			2.	Osteoarthritis		0.899621	0.867096	0.903546		0.524387	0.375234		0.00246142	2.20409e-05	0.117726	0.0861846	0.693227
2015		M.	Congenital anomalies			90.8012	82.6126	102.533		48.3673	42.4339		74.7874	4.25163	9.91798	0.757728	1.08647
2015		N.	Oral conditions			0.433062	0.391239	0.452564		0.206621	0.226442		0.0150075	0.0436512	0.232316	0.055142	0.0869455
2015	III.	Injuries				1539.91	1479.09	1633.69		966.963	572.946		54.0834	59.4234	983.871	187.586	254.945
2015		A.	Unintentional injuries			1015.81	973.065	1085.27		655.418	360.393		52.4173	53.6742	615.584	112.79	181.345
2015			1.	Road traffic accidents		484.007	475.917	480.323		345.208	138.799		7.83426	18.4862	364.862	49.3854	43.4394
2015			2.	Poisonings		77.3473	71.7185	91.8866		45.5445	31.8028		2.8695	3.1416	41.5025	14.2437	15.59
2015			3.	Falls		148.433	145.421	155.358		86.1622	62.2713		2.80951	3.05118	54.1824	20.9104	67.4799
2015			4.	Fires		36.6497	33.455	39.3748		14.5741	22.0756		2.10821	1.99311	20.4991	3.44603	8.60327
2015			5.	Drownings		104.024	94.2585	125.591		64.0587	39.9655		17.7036	20.2674	42.2984	8.3301	15.4248
2015			6.	Other unintentional injuries		165.349	152.295	192.74		99.87	65.4791		19.0922	6.73479	92.2395	16.4747	30.8079
2015		B.	Intentional injuries			524.098	506.024	548.419		311.545	212.553		1.66617	5.74917	368.287	74.7954	73.5996
2015			1.	Self-inflicted injuries		380.388	374.623	394.655		192.258	188.13		0	3.25906	245.547	64.8628	66.7197
2015			2.	Violence		120.583	111.113	130.495		98.9706	21.6119		1.57957	2.22071	102.74	8.29898	5.74374
2015			3.	War		19.8441	17.1656	19.7398		17.6868	2.15736		0.0333612	0.208799	17.3142	1.35819	0.929522
2030	Population (millions)					2138.75	2168.25	2102.12		1039.48	1099.26		133.617	285.309	1310.72	238.589	170.513
2030		All Causes				19157.1	17621.7	20906.4		9873.83	9283.26		304.402	79.9074	3941.21	3612.58	11219
2030	I.	Communicable, maternal, perinatal and nutritional conditions				1653.19	1050.95	2064.93		976.514	676.676		185.912	16.9049	894.596	133.579	422.197
2030		A.	Infectious and parasitic diseases			1119.27	649.814	1346.35		728.293	390.972		42.2315	12.7034	848.815	89.369	126.146
2030			1.	Tuberculosis		69.1816	42.3331	174.881		42.3635	26.818		0.268011	0.425845	29.6203	18.2959	20.5715
2030			2.	STDs excluding HIV		5.27956	3.50345	7.79448		3.05177	2.22779		0.272005	0.000580342	1.35663	0.895992	2.75436
2030			3.	HIV/AIDS		853.948	477.365	861.205		576.088	277.86		5.76482	8.22594	780.311	53.576	6.07037
2030			4.	Diarrhoeal diseases		36.5987	22.4853	65.9172		19.108	17.4908		16.0903	0.241284	2.4652	2.1846	15.6174
2030			5.	Childhood-cluster diseases		9.77202	4.09364	21.5634		5.3295	4.44252		6.75646	1.80962	0.93745	0.0648621	0.20363
2030				a.	Pertussis	0.549018	0.213712	1.44061		0.313124	0.235894		0.549018	0	0	0	0
2030				d.	Measles	7.04094	2.85106	15.3835		3.84368	3.19727		4.62356	1.74129	0.676096	0	0
2030				e.	Tetanus	2.09325	0.990833	4.54378		1.1091	0.984148		1.51355	0.0617793	0.250193	0.0642654	0.203454
2030			6.	Meningitis		10.2004	6.19409	17.2952		5.44489	4.75551		2.11979	0.290829	3.13725	0.969441	3.6831
2030			7.	Hepatitis B and C		16.3664	10.9716	27.384		12.8564	3.51004		0.248381	0.024916	8.49554	2.9093	4.68829
2030			8.	Malaria		5.44812	2.52607	10.9208		3.923	1.52512		3.769	0.0513099	0.548051	0.221044	0.85871
2030			9.	Tropical-cluster diseases		2.47769	1.71619	3.83837		1.60238	0.875308		0.0315554	0.0795689	0.842675	0.538432	0.98546
2030			10.	Leprosy		1.37322	0.957379	1.88167		1.24879	0.124437		0.00229597	0.000644017	0.261858	0.390604	0.717822
2030			11.	Dengue		1.81118	1.05832	2.84665		0.757566	1.05362		0.201263	0.519219	0.326688	0.126407	0.637604
2030			12.	Japanese encephalitis		0.516661	0.291746	1.06491		0.300406	0.216256		0.111356	0.0143727	0.249714	0.0331213	0.108097
2030			13.	Trachoma		0.0723147	0.0592449	0.08373		0.0723147	0		0.000261102	0	0.00183278	0	0.0702208
2030			14.	Intestinal nematode infections		0.546393	0.359041	0.893853		0.265724	0.28067		0.126298	0.0455782	0.0645291	0.0803473	0.229641
2030		B.	Respiratory infections			373.178	293.5	464.787		169.418	203.76		11.9081	3.74417	33.5063	41.5004	282.519
2030		C.	Maternal conditions			5.09254	2.17529	11.2622		0	5.09254		0	0	5.09254	0	0
2030		D.	Perinatal conditions			130.091	88.453	203.9		69.7849	60.3062		130.091	0.000209391	0	0	0
2030		E.	Nutritional deficiencies			25.5624	17.0079	38.6293		9.01699	16.5454		1.68178	0.457111	7.18259	2.70934	13.5316
2030			1.	Protein-energy malnutrition		9.32057	6.84889	13.3942		4.03487	5.2857		1.21515	0.284771	1.26822	0.769657	5.78277
2030			2.	Iodine deficiency		0.0221313	0.00977241	0.0475082		0.0141341	0.00799719		0.00960769	0.0091004	0.000863464	0.00210676	0.000453021
2030			3.	Vitamin A deficiency		0.0522798	0.0265545	0.10136		0.0447247	0.00755509		0.0094401	0.0199121	0.0229276	0	0
2030			4.	Iron-deficiency anaemia		9.76745	5.76672	16.0247		2.87871	6.88874		0.255036	0.122092	5.41559	1.39484	2.57989
2030	II.	Noncommunicable diseases				15838.3	15005.8	16966.8		7918.86	7919.4		85.6266	20.7352	2126.76	3216.83	10388.3
2030		A.	Malignant neoplasms			4133.07	4115.11	3902.21		2450.68	1682.4		7.16951	8.7984	956.403	1256.69	1904.01
2030			1.	Mouth and oropharynx cancers		117.871	116.981	114.245		76.1177	41.7533		0.0550885	0.0551575	37.8939	34.2803	45.5865
2030			2.	Oesophagus cancer		424.624	428.238	389.26		257.14	167.484		0.000101972	0.00013066	74.5468	145.453	204.624
2030			3.	Stomach cancer		803.955	811.585	734.246		494.651	309.304		0.0179301	0.045919	155.104	226.649	422.138
2030			4.	Colon and rectum cancers		297.494	303.688	269.443		156.737	140.757		0.00442814	0.023364	58.4718	78.9409	160.053
2030			5.	Liver cancer		613.907	612.962	582.672		429.483	184.424		0.472894	0.249964	189.177	192.439	231.569
2030			6.	Pancreas cancer		67.3955	68.2179	62.57		38.182	29.2135		0.00739266	0.0406614	15.7598	18.3823	33.2054
2030			7.	Trachea, bronchus, lung cancers		1056.96	1017.2	1031.22		720.162	336.795		0	0	211.888	373.573	471.496
2030			8.	Melanoma and other skin cancers		8.49705	8.77455	8.02266		4.31504	4.18201		0.00547296	0.00775039	1.68093	2.27901	4.5239
2030			9.	Breast cancer		146.371	144.656	143.762		0.108177	146.262		0.00816705	5.22594e-06	61.8447	37.3942	47.1235
2030			10.	Cervix uteri cancer		85.8092	83.7806	83.394		0	85.8092		0.00879567	6.71562e-05	23.9012	26.1691	35.73
2030			11.	Corpus uteri cancer		14.9069	15.2443	14.3136		0	14.9069		0.000403921	0.000823181	4.07006	4.12486	6.71079
2030			12.	Ovary cancer		38.5817	37.8917	37.5287		0	38.5817		0.012563	0.086409	12.9383	10.3451	15.1994
2030			13.	Prostate cancer		39.542	43.5303	34.9178		39.542	0		2.68495e-06	6.06198e-06	1.54071	7.43474	30.5665
2030			14.	Bladder cancer		65.3563	68.0268	58.0031		47.0619	18.2944		0.00927932	0.0101523	4.89739	14.6554	45.7841
2030			15.	Lymphomas, multiple myeloma		68.0949	68.7234	65.4173		38.7755	29.3194		0.507977	1.30974	23.0932	15.9164	27.2676
2030			16.	Leukaemia		94.2737	93.861	91.9707		51.7539	42.5198		3.67913	5.55799	34.9752	18.9206	31.1408
2030		B.	Other neoplasms			32.6107	32.6212	31.1861		14.5409	18.0697		0.583667	0.429937	10.102	7.57353	13.9215
2030		C.	Diabetes mellitus			517.268	456.558	569.271		201.826	315.441		0.162398	0.185907	87.7824	139.904	289.233
2030		D.	Endocrine disorders			65.6614	61.3285	72.6944		27.2596	38.4017		4.52016	0.986712	16.5844	8.42387	35.1462
2030		E.	Neuropsychiatric conditions			301.289	294.871	316.372		138.833	162.455		2.00622	1.57259	56.6541	31.3382	209.717
2030			1.	Unipolar depressive disorders		1.75121	1.54718	1.92905		0.753615	0.997594		1.71478e-05	1.36776e-06	1.32812	0.395898	0.0271731
2030			2.	Bipolar disorder		0.224392	0.212363	0.249812		0.0242176	0.200175		0.00344408	9.84423e-07	0.112448	0.00290972	0.105589
2030			3.	Schizophrenia		7.12119	6.61734	7.96669		2.97353	4.14766		0.00148166	0.0175404	4.19043	0.915598	1.99614
2030			4.	Epilepsy		18.7683	16.7284	22.0129		10.4191	8.34924		1.0488	0.828216	12.2565	1.57466	3.06015
2030			5.	Alcohol use disorders		14.2933	13.3695	16.0043		12.5834	1.7099		0.00357812	0.000285405	8.91878	3.19189	2.17878
2030			6.	Alzheimer and other dementias		112.522	113.553	114.801		40.7599	71.7617		0.223817	0.0793389	3.82262	6.77607	101.62
2030			7.	Parkinson disease		48.0796	48.2149	49.6844		20.3487	27.7309		0.0145475	0.00339956	1.41911	3.91325	42.7293
2030			8.	Multiple sclerosis		1.71558	1.62947	1.92191		0.571036	1.14454		0.00151819	0.00407717	0.694804	0.465107	0.550071
2030			9.	Drug use disorders		9.31739	8.5782	10.2423		7.61613	1.70125		0.000148283	3.02742e-05	8.83488	0.295878	0.186446
2030			10.	Post-traumatic stress disorder		0.0324065	0.0311301	0.0331122		0.0187482	0.0136583		2.84661e-06	2.27032e-07	0.0122835	0.00704979	0.0130702
2030			11.	Obsessive-compulsive disorder		0	0	0		0	0		0	0	0	0	0
2030			12.	Panic disorder		0	0	0		0	0		0	0	0	0	0
2030			13.	Insomnia (primary)		0	0	0		0	0		0	0	0	0	0
2030			14.	Migraine		0	0	0		0	0		0	0	0	0	0
2030		F.	Sense organ diseases			0.685521	0.643646	0.722773		0.373327	0.312194		0.0157468	0.0177561	0.233761	0.0859081	0.332348
2030			1.	Glaucoma		0.0180814	0.0160434	0.0197532		0.0180814	0		0.00162058	0	0.0125995	0.00386134	0
2030			2.	Cataracts		0	0	0		0	0		0	0	0	0	0
2030			3.	Vision disorders, age-related		0	0	0		0	0		0	0	0	0	0
2030			4.	Hearing loss, adult onset		0	0	0		0	0		0	0	0	0	0
2030		G.	Cardiovascular diseases			5962.92	5710.46	6816.47		2684.1	3278.83		6.91319	2.42661	564.954	998.998	4389.63
2030			1.	Rheumatic heart disease		130.898	120.638	163.556		49.0722	81.8261		0.814037	0.549508	28.3432	29.0092	72.1824
2030			2.	Hypertensive heart disease		490.462	462.259	563.676		233.164	257.298		0.197048	0.0812028	46.5503	87.1064	356.527
2030			3.	Ischaemic heart disease		1718.85	1614.95	1973.7		805.597	913.258		0.845083	0.2453	208.14	334.606	1175.02
2030			4.	Cerebrovascular disease		2852.81	2775.42	3245.28		1292.1	1560.71		1.69082	0.535682	209.785	457.6	2183.2
2030			5.	Inflammatory heart diseases		120.785	116.693	138.533		47.8977	72.8873		0.6887	0.140583	10.1669	14.1415	95.6472
2030		H.	Respiratory diseases			3792.87	3416.22	4035.96		1848.39	1944.48		6.03005	1.33067	208.265	562.596	3014.64
2030			1.	Chronic obstructive pulmonary disease		3321.37	2987.42	3531.56		1607.93	1713.43		0.218981	0.0366299	145.461	493.97	2681.68
2030			2.	Asthma		89.6226	75.5437	102.323		48.47	41.1526		0.943818	0.642268	35.4103	19.2383	33.3879
2030		I.	Digestive diseases			584.664	496.818	724.447		315.659	269.005		9.3811	1.01384	143.065	120.82	310.384
2030			1.	Peptic ulcer disease		131.149	115.338	153.736		73.6989	57.4505		0.570231	0.0895521	27.4692	29.4369	73.5835
2030			2.	Cirrhosis of the liver		204.31	164.372	275.53		125.024	79.2856		0.86943	0.227534	71.068	47.0851	85.0596
2030		J.	Genitourinary diseases			336.272	321.434	367.936		183.183	153.089		0.921581	0.812784	64.3456	80.7298	189.462
2030			1.	Nephritis and nephrosis		259.196	246.08	286.41		133.224	125.973		0.664599	0.766448	53.974	63.8331	139.958
2030			2.	Benign prostatic hypertrophy		16.6772	17.1673	16.5281		16.6772	0		0	0	1.15111	2.70414	12.822
2030		K.	Skin diseases			15.2265	14.6214	15.8549		6.32192	8.90461		0.234254	0.094426	3.03318	2.22142	9.64324
2030		L.	Musculoskeletal diseases			34.8463	33.7231	37.1612		15.0175	19.8288		0.180439	0.265287	7.56997	6.43608	20.3945
2030			1.	Rheumatoid arthritis		10.5867	10.3407	11.3319		4.37266	6.21407		0.00248348	0.00773294	2.01403	2.39218	6.17031
2030			2.	Osteoarthritis		1.35687	1.37071	1.34213		0.774869	0.582001		0.0014377	1.68043e-05	0.131642	0.117599	1.10618
2030		M.	Congenital anomalies			60.3994	51.0107	76.0102		32.4668	27.9325		47.4987	2.76998	7.53908	0.936814	1.65478
2030		N.	Oral conditions			0.485557	0.433006	0.532685		0.219781	0.265776		0.00953161	0.0302729	0.233146	0.0756218	0.136985
2030	III.	Injuries				1665.63	1564.86	1874.6		978.448	687.178		32.8633	42.2674	919.848	262.174	408.473
2030		A.	Unintentional injuries			1044.23	963.625	1218.27		616.6	427.632		31.3525	36.9434	537.766	150.245	287.924
2030			1.	Road traffic accidents		504.098	462.259	560.148		342.136	161.962		6.44036	15.9338	351.559	64.6549	65.51
2030			2.	Poisonings		76.1996	68.378	102.053		39.6024	36.5972		1.44816	2.092	29.0988	18.2641	25.2965
2030			3.	Falls		186.04	185.76	193.884		92.5402	93.4997		1.82055	2.05136	44.3975	29.1327	108.638
2030			4.	Fires		38.6502	35.1773	44.3423		14.638	24.0122		1.33168	1.48641	17.289	4.83074	13.7123
2030			5.	Drownings		85.7958	74.6813	118.235		46.6566	39.1392		9.84245	11.1538	28.6435	11.1433	25.0128
2030			6.	Other unintentional injuries		153.448	137.369	199.61		81.0268	72.4208		10.4693	4.22599	66.778	22.2191	49.7551
2030		B.	Intentional injuries			621.395	601.233	656.331		361.848	259.546		1.51074	5.32404	382.083	111.929	120.548
2030			1.	Self-inflicted injuries		453.731	453.291	466.567		223.325	230.405		0	3.02559	244.663	96.5911	109.451
2030			2.	Violence		141.212	128.374	163.35		115.709	25.5029		1.43194	2.04732	115.687	12.8158	9.22923
2030			3.	War		22.7426	16.0491	22.2505		19.8743	2.8683		0.0302739	0.198413	18.8845	2.09333	1.53611

## Sheet: Europe and Central Asia
Deaths by cause, scenario, sex and age for the years 2002, 2015 and 2030
Source: Mathers CD, Loncar D (2006). Projections of global mortality and burden of disease from 2002 to 2030.
Europe and Central Asia
						Total deaths ('000)				Baseline deaths ('000)			Baseline projections ('000) by age group
Year		Cause				Baseline	Optimistic	Pessimistic		Male	Female		0-4	5-14	15-59	60-69	70+
2002	Population (millions)					477.248	477.248	477.248		229.618	247.63		29.113	71.7941	301.927	39.6171	34.7968
2002		All Causes				5800.67	5800.67	5800.67		3062.68	2737.98		167.877	32.5202	1555.69	1151.27	2893.31
2002	I.	Communicable, maternal, perinatal and nutritional conditions				329.671	329.671	329.671		216.874	112.797		122.287	6.94019	132.477	28.1122	39.8555
2002		A.	Infectious and parasitic diseases			148.979	148.979	148.979		110.009	38.9692		31.5195	2.72119	92.2374	12.5405	9.96016
2002			1.	Tuberculosis		63.9662	63.9662	63.9662		53.0501	10.9161		0.188149	0.156059	49.9569	8.80362	4.86146
2002			2.	STDs excluding HIV		0.647876	0.647876	0.647876		0.285671	0.362205		0.32506	0.00222222	0.164015	0.0271128	0.129465
2002			3.	HIV/AIDS		32.8646	32.8646	32.8646		28.6417	4.22297		0.967432	0.368811	30.9453	0.567726	0.0153376
2002			4.	Diarrhoeal diseases		14.1781	14.1781	14.1781		7.43605	6.7421		11.7248	0.187724	1.01132	0.302151	0.952106
2002			5.	Childhood-cluster diseases		5.95048	5.95048	5.95048		2.95205	2.99843		4.89677	0.850723	0.101726	0.0328371	0.0684253
2002				a.	Pertussis	0.127126	0.127126	0.127126		0.0628031	0.0643224		0.125912	0	0.00121388	0	0
2002				d.	Measles	5.53105	5.53105	5.53105		2.76729	2.76376		4.70151	0.824474	0.00252361	0.00254788	0
2002				e.	Tetanus	0.160356	0.160356	0.160356		0.0625642	0.097792		0.0607167	0.00201629	0.0156977	0.0242701	0.0576555
2002			6.	Meningitis		13.684	13.684	13.684		7.64071	6.04332		8.89961	0.461513	2.68008	0.76101	0.881825
2002			7.	Hepatitis B and C		3.94683	3.94683	3.94683		2.23323	1.71359		0.518	0.18799	2.53191	0.358494	0.350435
2002			8.	Malaria		0.0609568	0.0609568	0.0609568		0.0318051	0.0291517		0.0481136	0.000564706	0.00782486	0.00339475	0.00105882
2002			9.	Tropical-cluster diseases		0.111305	0.111305	0.111305		0.0976645	0.0136403		0.0320985	0.00286357	0.0197838	0.0188097	0.0377492
2002			10.	Leprosy		0.0309363	0.0309363	0.0309363		0.0294234	0.00151285		0	0	0.00121802	0.00265667	0.0270616
2002			11.	Dengue		0	0	0		0	0		0	0	0	0	0
2002			12.	Japanese encephalitis		0	0	0		0	0		0	0	0	0	0
2002			13.	Trachoma		0	0	0		0	0		0	0	0	0	0
2002			14.	Intestinal nematode infections		0.0520788	0.0520788	0.0520788		0.0464976	0.00558118		0.00191877	0	0.00632402	0.00359792	0.0402381
2002		B.	Respiratory infections			117.256	117.256	117.256		72.0121	45.2443		34.1003	4.00143	35.964	14.8522	28.3385
2002		C.	Maternal conditions			2.57616	2.57616	2.57616		0	2.57616		0	0	2.57616	0	0
2002		D.	Perinatal conditions			55.928	55.928	55.928		32.4587	23.4693		55.9228	0.00100718	0.00256727	0	0.00162794
2002		E.	Nutritional deficiencies			4.932	4.932	4.932		2.39397	2.53803		0.744092	0.216556	1.69658	0.719532	1.55524
			1.	Protein-energy malnutrition		1.67442	1.67442	1.67442		0.836932	0.837485		0.230796	0.0447775	0.681004	0.240276	0.477564
			2.	Iodine deficiency		0.0265717	0.0265717	0.0265717		0.00942998	0.0171417		0.00245468	0.00198316	0.0113011	0.00215853	0.00867419
			3.	Vitamin A deficiency		0.0063546	0.0063546	0.0063546		0.00104043	0.00531417		2.53863e-05	8.16755e-05	0.00439958	0.00107425	0.000773705
			4.	Iron-deficiency anaemia		2.85723	2.85723	2.85723		1.34718	1.51005		0.462195	0.148927	0.884379	0.420325	0.941401
2002	II.	Noncommunicable diseases				4860.5	4860.5	4860.5		2374.82	2485.69		35.1142	11.7386	969.397	1048.75	2795.5
2002		A.	Malignant neoplasms			835.679	835.679	835.679		471.984	363.695		1.73931	3.49568	252.464	249.988	327.991
2002			1.	Mouth and oropharynx cancers		27.2115	27.2115	27.2115		22.3389	4.87262		0.0182366	0.0548889	12.4951	8.27483	6.36846
2002			2.	Oesophagus cancer		20.6885	20.6885	20.6885		15.1551	5.53333		0.00182179	0.00232549	6.18948	6.9512	7.54366
2002			3.	Stomach cancer		99.1745	99.1745	99.1745		59.0393	40.1352		0.00963943	0.0167091	26.0029	30.1875	42.9578
2002			4.	Colon and rectum cancers		97.9285	97.9285	97.9285		48.9064	49.0221		0.00703975	0.0148594	19.8403	28.0951	49.9712
2002			5.	Liver cancer		27.375	27.375	27.375		16.4875	10.8875		0.0635825	0.0437755	7.05095	8.69795	11.5187
2002			6.	Pancreas cancer		36.7747	36.7747	36.7747		19.8376	16.9371		0.00199378	0.00674665	9.77912	11.1969	15.79
2002			7.	Trachea, bronchus, lung cancers		167.094	167.094	167.094		137.849	29.2449		0.0172604	0.0357165	49.4493	60.584	57.0077
2002			8.	Melanoma and other skin cancers		11.2596	11.2596	11.2596		5.51756	5.74206		0.000976952	0.00866217	4.2392	2.43276	4.57802
2002			9.	Breast cancer		64.1887	64.1887	64.1887		0.703759	63.4849		0.00131326	0.00806083	25.7585	16.3387	22.0822
2002			10.	Cervix uteri cancer		19.0037	19.0037	19.0037		0	19.0037		0	0.00121963	9.53735	3.79612	5.66897
2002			11.	Corpus uteri cancer		16.529	16.529	16.529		0	16.529		0.00070313	0	4.26272	4.95997	7.30562
2002			12.	Ovary cancer		21.7712	21.7712	21.7712		0	21.7712		0.00479301	0.0398712	8.01763	6.29535	7.41354
2002			13.	Prostate cancer		26.849	26.849	26.849		26.849	0		0.00114745	0.00665429	2.14737	7.25134	17.4425
2002			14.	Bladder cancer		24.2959	24.2959	24.2959		19.2438	5.05209		0.0146338	0.0082063	3.7258	7.3457	13.2016
2002			15.	Lymphomas, multiple myeloma		23.1176	23.1176	23.1176		12.6167	10.5009		0.131819	0.487332	9.24971	5.96307	7.28566
2002			16.	Leukaemia		27.0259	27.0259	27.0259		14.8877	12.1382		0.65493	1.31173	10.1463	6.17751	8.7354
2002		B.	Other neoplasms			8.32369	8.32369	8.32369		4.14763	4.17606		0.140475	0.124763	3.07891	1.92842	3.05112
2002		C.	Diabetes mellitus			51.2353	51.2353	51.2353		20.5464	30.6889		0.0519118	0.142586	12.3558	15.0291	23.6559
2002		D.	Endocrine disorders			5.74971	5.74971	5.74971		2.82878	2.92093		0.740775	0.275598	2.44164	0.911855	1.37984
2002		E.	Neuropsychiatric conditions			74.0421	74.0421	74.0421		47.8735	26.1686		2.90172	2.73081	45.5809	9.27806	13.5506
2002			1.	Unipolar depressive disorders		0.079293	0.079293	0.079293		0.0382228	0.0410702		0.00188104	0.00135755	0.0543958	0.00821656	0.0134421
2002			2.	Bipolar disorder		0.00516627	0.00516627	0.00516627		0	0.00516627		0.000101367	8.23521e-05	0.000408674	0.00244237	0.00213151
2002			3.	Schizophrenia		1.44145	1.44145	1.44145		0.78692	0.654527		0.0243629	0.0172366	0.957215	0.260443	0.182189
2002			4.	Epilepsy		8.86823	8.86823	8.86823		5.76657	3.10167		0.30632	0.575436	6.8499	0.689151	0.44743
2002			5.	Alcohol use disorders		15.1861	15.1861	15.1861		12.7745	2.41164		0.0592654	0.0268474	11.5837	2.81684	0.699489
2002			6.	Alzheimer and other dementias		10.9022	10.9022	10.9022		4.64064	6.26155		0.232137	0.162922	2.51557	1.80758	6.18398
2002			7.	Parkinson disease		3.6666	3.6666	3.6666		1.85615	1.81045		0.0808456	0.0579931	0.504669	0.711764	2.31132
2002			8.	Multiple sclerosis		3.85581	3.85581	3.85581		1.68303	2.17278		0.0259771	0.0181854	2.64667	0.52473	0.640248
2002			9.	Drug use disorders		10.9131	10.9131	10.9131		9.00253	1.9106		0.0258563	0.0117419	10.6594	0.11769	0.0984209
2002			10.	Post-traumatic stress disorder		0.00914351	0.00914351	0.00914351		0.00211544	0.00702807		0.000350433	0.000225389	0.0042755	0.00180172	0.00249047
2002			11.	Obsessive-compulsive disorder		0	0	0		0	0		0	0	0	0	0
2002			12.	Panic disorder		0	0	0		0	0		0	0	0	0	0
2002			13.	Insomnia (primary)		0	0	0		0	0		0	0	0	0	0
2002			14.	Migraine		0	0	0		0	0		0	0	0	0	0
2002		F.	Sense organ diseases			0.292595	0.292595	0.292595		0.163611	0.128984		0.0326944	0.00634674	0.135824	0.0579666	0.0597627
2002			1.	Glaucoma		0.0016845	0.0016845	0.0016845		0.0016845	0		0	0	0.0016845	0	0
2002			2.	Cataracts		0	0	0		0	0		0	0	0	0	0
2002			3.	Vision disorders, age-related		0	0	0		0	0		0	0	0	0	0
2002			4.	Hearing loss, adult onset		0	0	0		0	0		0	0	0	0	0
2002		G.	Cardiovascular diseases			3395.49	3395.49	3395.49		1534.01	1861.47		2.38299	1.61016	494.535	660.696	2236.26
2002			1.	Rheumatic heart disease		20.5462	20.5462	20.5462		8.53305	12.0131		0.0131815	0.071664	9.94376	5.6849	4.83269
2002			2.	Hypertensive heart disease		115.465	115.465	115.465		49.194	66.2711		0.0648157	0.0327451	19.6644	27.1054	68.5977
2002			3.	Ischaemic heart disease		1738.82	1738.82	1738.82		847.221	891.597		0.0146778	0.0248348	259.862	363.073	1115.84
2002			4.	Cerebrovascular disease		1057.42	1057.42	1057.42		418.23	639.185		0.778357	0.754324	117.573	201.974	736.336
2002			5.	Inflammatory heart diseases		74.1344	74.1344	74.1344		44.1964	29.938		0.666963	0.242187	26.4757	13.2942	33.4553
2002		H.	Respiratory diseases			187.473	187.473	187.473		119.528	67.9454		2.55113	0.738386	32.844	46.4814	104.858
2002			1.	Chronic obstructive pulmonary disease		123.637	123.637	123.637		80.2026	43.4339		0.0957323	0.0680751	16.1966	31.2729	76.0033
2002			2.	Asthma		31.2875	31.2875	31.2875		18.8505	12.437		0.144154	0.117426	5.6514	8.60236	16.7722
2002		I.	Digestive diseases			214.52	214.52	214.52		127.648	86.8714		1.36618	0.787962	99.9816	50.4642	61.9198
2002			1.	Peptic ulcer disease		22.4883	22.4883	22.4883		15.1238	7.36446		0.00552161	0.0981387	8.69266	5.30661	8.38537
2002			2.	Cirrhosis of the liver		109.165	109.165	109.165		68.0319	41.1328		0.0976535	0.267168	59.4142	28.0282	21.3574
2002		J.	Genitourinary diseases			51.4349	51.4349	51.4349		27.3641	24.0707		0.484112	0.581034	18.663	11.5673	20.1395
2002			1.	Nephritis and nephrosis		35.3411	35.3411	35.3411		18.0328	17.3083		0.259379	0.379381	13.7074	7.73225	13.2627
2002			2.	Benign prostatic hypertrophy		3.35092	3.35092	3.35092		3.35092	0		0	0	0.14003	0.870777	2.34011
2002		K.	Skin diseases			3.32653	3.32653	3.32653		1.61679	1.70974		0.0340548	0.0276426	1.7538	0.698612	0.812416
2002		L.	Musculoskeletal diseases			5.766	5.766	5.766		2.00202	3.76398		0.0662516	0.126861	2.678	1.33337	1.56151
2002			1.	Rheumatoid arthritis		1.98088	1.98088	1.98088		0.444657	1.53622		0.00708561	0.0146595	0.600021	0.591479	0.767634
2002			2.	Osteoarthritis		0.159162	0.159162	0.159162		0.0689484	0.0902136		0.00227669	0.000469673	0.0320185	0.043921	0.0804761
2002		M.	Congenital anomalies			27.1375	27.1375	27.1375		15.0814	12.0561		22.6226	1.09079	2.86939	0.310833	0.243876
2002		N.	Oral conditions			0.0363947	0.0363947	0.0363947		0.0196895	0.0167052		0	0	0.0153392	0.00784813	0.0132074
2002	III.	Injuries				610.494	610.494	610.494		470.992	139.502		10.4766	13.8414	453.821	74.4033	57.9512
2002		A.	Unintentional injuries			403.991	403.991	403.991		305.727	98.2642		10.0325	11.4563	288.66	53.2276	40.6153
2002			1.	Road traffic accidents		82.2848	82.2848	82.2848		60.9976	21.2871		1.3231	3.56202	62.1005	7.94177	7.35742
2002			2.	Poisonings		104.629	104.629	104.629		79.8101	24.8189		0.990122	0.780011	82.0867	15.3234	5.44887
2002			3.	Falls		35.39	35.39	35.39		23.9145	11.4755		0.526156	0.519834	17.9098	5.22441	11.2098
2002			4.	Fires		21.4947	21.4947	21.4947		15.1433	6.35141		0.875867	0.471431	13.1884	3.47436	3.48463
2002			5.	Drownings		34.4339	34.4339	34.4339		28.2855	6.14839		1.58058	2.72683	24.9824	3.20117	1.94289
2002			6.	Other unintentional injuries		125.759	125.759	125.759		97.5762	28.1829		4.73672	3.39615	88.3919	18.0626	11.1717
2002		B.	Intentional injuries			206.502	206.502	206.502		165.264	41.2379		0.444059	2.3851	165.161	21.1757	17.3359
2002			1.	Self-inflicted injuries		118.138	118.138	118.138		96.5822	21.5555		0.00560758	1.4772	90.4552	13.6956	12.5041
2002			2.	Violence		68.8295	68.8295	68.8295		51.2494	17.5801		0.395024	0.65981	57.2686	6.32662	4.17943
2002			3.	War		18.8621	18.8621	18.8621		17.0039	1.85822		0.0398958	0.245899	16.7844	1.14145	0.650401
2015	Population (millions)					457.766	459.04	454.078		211.294	246.472		28.4002	56.8565	294.096	40.8718	37.5414
2015		All Causes				5860.34	5692.44	6208.81		3056.91	2803.42		96.2887	19.9584	1423.73	963.433	3356.93
2015	I.	Communicable, maternal, perinatal and nutritional conditions				376.174	304.329	439.468		256.439	119.734		62.7305	4.27677	246.073	23.5403	39.5526
2015		A.	Infectious and parasitic diseases			264.843	214.002	299.785		192.379	72.4634		11.9059	2.61597	225.373	15.1698	9.77796
2015			1.	Tuberculosis		60.1891	38.3282	65.2518		48.0933	12.0958		0.15053	0.0952186	49.9166	6.18498	3.84186
2015			2.	STDs excluding HIV		0.367403	0.274374	0.48975		0.169239	0.198164		0.148804	0.000592677	0.0768429	0.0158001	0.125363
2015			3.	HIV/AIDS		180.899	158.35	200.776		131.505	49.3941		0.835396	1.73626	169.874	7.25239	1.20157
2015			4.	Diarrhoeal diseases		6.52999	4.46768	9.47078		3.41642	3.11357		4.68178	0.0797841	0.669798	0.174664	0.923958
2015			5.	Childhood-cluster diseases		1.70347	1.19376	2.67286		0.875055	0.828411		1.31124	0.273062	0.0426116	0.0163421	0.0602096
2015				a.	Pertussis	0.0416251	0.0272372	0.0652626		0.021217	0.0204081		0.0412271	0	0.000398022	0	0
2015				d.	Measles	1.51612	1.04867	2.41264		0.796796	0.719327		1.25088	0.263541	0.000839679	0.000860135	0
2015				e.	Tetanus	0.086169	0.0716278	0.104714		0.0309932	0.0551758		0.0157399	0.000758076	0.00630085	0.0123942	0.050976
2015			6.	Meningitis		5.31739	3.87584	7.75552		2.9477	2.36969		2.77289	0.162476	1.19042	0.386573	0.805032
2015			7.	Hepatitis B and C		2.18069	1.55898	3.00689		1.18843	0.992263		0.31271	0.0856214	1.26417	0.217312	0.300879
2015			8.	Malaria		0.0359777	0.021569	0.0514484		0.0180578	0.01792		0.0292446	0.000278973	0.00407844	0.00136539	0.00101033
2015			9.	Tropical-cluster diseases		0.0559175	0.0456422	0.0763183		0.0481382	0.00777926		0.00843663	0.000837381	0.0102085	0.0080195	0.0284155
2015			10.	Leprosy		0.0225793	0.0197581	0.024402		0.0211543	0.00142492		0	0	0.000429682	0.00240838	0.0197412
2015			11.	Dengue		0	0	0		0	0		0	0	0	0	0
2015			12.	Japanese encephalitis		0	0	0		0	0		0	0	0	0	0
2015			13.	Trachoma		0	0	0		0	0		0	0	0	0	0
2015			14.	Intestinal nematode infections		0.0477601	0.042894	0.0515551		0.0445315	0.00322862		0.000908004	0	0.0035974	0.00234063	0.0409141
2015		B.	Respiratory infections			73.0004	58.0497	91.4541		42.768	30.2325		16.2606	1.5709	18.6862	8.01475	28.4679
2015		C.	Maternal conditions			1.03588	0.681084	1.64176		0	1.03588		0	0	1.03588	0	0
2015		D.	Perinatal conditions			34.2423	29.2295	42.6887		19.8777	14.3646		34.24	0.000339016	0.000867709	0	0.00108936
2015		E.	Nutritional deficiencies			3.05251	2.36639	3.89837		1.41445	1.63806		0.324078	0.08957	0.977525	0.355695	1.30564
2015			1.	Protein-energy malnutrition		1.04071	0.79336	1.30897		0.476965	0.563748		0.100673	0.0212299	0.409492	0.118953	0.390365
2015			2.	Iodine deficiency		0.0178597	0.0128526	0.0216798		0.0056909	0.0121688		0.00084948	0.00097792	0.00779684	0.00113515	0.00710033
2015			3.	Vitamin A deficiency		0.00384542	0.00294921	0.0050353		0.00040343	0.00344199		1.76731e-05	4.8477e-05	0.00194956	0.00081163	0.00101808
2015			4.	Iron-deficiency anaemia		1.72079	1.36116	2.23785		0.793451	0.927342		0.19262	0.0568303	0.483372	0.203961	0.784009
2015	II.	Noncommunicable diseases				4963.28	4883.15	5199.88		2418.14	2545.14		25.3602	6.97106	802.171	878.848	3249.94
2015		A.	Malignant neoplasms			817.156	808.633	796.284		445.93	371.227		1.45916	2.43413	220.661	221.472	371.131
2015			1.	Mouth and oropharynx cancers		23.8266	23.5649	23.3153		18.7472	5.07933		0.0161976	0.0385194	9.9207	6.67828	7.17288
2015			2.	Oesophagus cancer		19.5237	19.2519	18.9366		13.6779	5.84575		0.00223678	0.00209283	5.34003	5.82948	8.34986
2015			3.	Stomach cancer		94.5199	93.5969	90.7768		54.5166	40.0032		0.00983198	0.0133851	22.3582	25.2074	46.9311
2015			4.	Colon and rectum cancers		98.0883	97.258	92.0341		49.4066	48.6817		0.00679073	0.00991437	17.205	24.3545	56.5121
2015			5.	Liver cancer		26.7273	26.4611	25.7563		15.6157	11.1117		0.0516269	0.0292681	6.32713	7.67379	12.6455
2015			6.	Pancreas cancer		35.0469	34.7403	33.5105		18.2289	16.8179		0.00159367	0.0048589	8.05017	9.73054	17.2597
2015			7.	Trachea, bronchus, lung cancers		163.125	160.77	166.164		125.31	37.8146		0	0	42.9752	52.9492	67.2002
2015			8.	Melanoma and other skin cancers		11.3983	11.2759	11.0365		5.58927	5.80903		0.000700598	0.00617772	3.49279	2.16166	5.73697
2015			9.	Breast cancer		64.1406	63.2937	62.7236		0.688017	63.4526		0.00139737	0.00599975	24.9048	16.4358	22.7926
2015			10.	Cervix uteri cancer		18.1071	17.7697	18.0635		0	18.1071		0	0.00107618	8.57472	3.91445	5.61684
2015			11.	Corpus uteri cancer		16.4284	16.2271	15.9407		0	16.4284		0.000710399	0	4.1572	5.004	7.26648
2015			12.	Ovary cancer		20.6155	20.2524	20.1052		0	20.6155		0.00448062	0.027587	7.24774	6.16232	7.17333
2015			13.	Prostate cancer		31.6886	31.6905	29.021		31.6886	0		0.000869192	0.00532429	1.6946	5.77267	24.2151
2015			14.	Bladder cancer		26.1168	26.0675	24.6924		20.6539	5.46291		0.0114944	0.00584236	3.24014	6.23967	16.6197
2015			15.	Lymphomas, multiple myeloma		22.7634	22.5639	22.1105		12.1293	10.6341		0.110739	0.347795	8.46588	5.74319	8.09582
2015			16.	Leukaemia		25.9879	25.7535	25.2772		14.132	11.8559		0.565028	0.950734	8.98874	5.69222	9.79114
2015		B.	Other neoplasms			8.20624	8.15974	7.97428		3.96726	4.23898		0.117974	0.0798135	2.60408	1.81667	3.58771
2015		C.	Diabetes mellitus			53.2274	49.8326	56.4485		21.3919	31.8355		0.0376579	0.0901333	12.6781	14.5999	25.8216
2015		D.	Endocrine disorders			4.95126	4.70095	5.47925		2.3688	2.58246		0.459464	0.149052	2.01349	0.805584	1.52367
2015		E.	Neuropsychiatric conditions			63.1816	60.7204	68.8333		39.2015	23.98		2.07354	1.59212	36.3417	7.76142	15.4128
2015			1.	Unipolar depressive disorders		0.0643342	0.061615	0.0707341		0.0291381	0.0351961		0.00151656	0.000865874	0.0440393	0.00688861	0.0110238
2015			2.	Bipolar disorder		0.00535476	0.00513435	0.00586061		0	0.00535476		8.0699e-05	5.09773e-05	0.00042921	0.0024097	0.00238417
2015			3.	Schizophrenia		1.21586	1.17315	1.32396		0.631589	0.584273		0.0194235	0.010893	0.79552	0.212138	0.177888
2015			4.	Epilepsy		7.50071	7.07292	8.22508		4.77479	2.72593		0.217422	0.362273	5.87162	0.588918	0.460478
2015			5.	Alcohol use disorders		11.6133	11.3033	12.6761		9.5095	2.10378		0.0473291	0.015128	8.77226	2.13963	0.638928
2015			6.	Alzheimer and other dementias		11.1948	10.8902	11.8876		4.83881	6.35601		0.175728	0.0993254	2.15422	1.53577	7.22978
2015			7.	Parkinson disease		3.78833	3.69201	3.99164		2.00847	1.77985		0.0656441	0.0372984	0.498386	0.609831	2.57717
2015			8.	Multiple sclerosis		3.37235	3.25348	3.69086		1.41362	1.95873		0.0209941	0.0101421	2.10397	0.48029	0.756954
2015			9.	Drug use disorders		8.2234	7.88674	9.19337		6.65565	1.56775		0.0203203	0.0063096	7.98155	0.115564	0.0996547
2015			10.	Post-traumatic stress disorder		0.011588	0.0111482	0.0123072		0.00238088	0.00920709		0.00029585	0.000154645	0.00401249	0.00203445	0.00509053
2015			11.	Obsessive-compulsive disorder		0	0	0		0	0		0	0	0	0	0
2015			12.	Panic disorder		0	0	0		0	0		0	0	0	0	0
2015			13.	Insomnia (primary)		0	0	0		0	0		0	0	0	0	0
2015			14.	Migraine		0	0	0		0	0		0	0	0	0	0
2015		F.	Sense organ diseases			0.224997	0.217271	0.249057		0.12346	0.101538		0.0188481	0.00311739	0.101381	0.0429647	0.0586858
2015			1.	Glaucoma		0.00232435	0.00221384	0.00249329		0.00232435	0		0	0	0.00232435	0	0
2015			2.	Cataracts		0	0	0		0	0		0	0	0	0	0
2015			3.	Vision disorders, age-related		0	0	0		0	0		0	0	0	0	0
2015			4.	Hearing loss, adult onset		0	0	0		0	0		0	0	0	0	0
2015		G.	Cardiovascular diseases			3549.67	3520.68	3744.37		1633.35	1916.33		2.08833	0.836346	396.586	541.33	2608.83
2015			1.	Rheumatic heart disease		16.0911	15.2571	18.7912		6.4455	9.6456		0.0124364	0.0386284	7.60088	4.05446	4.38469
2015			2.	Hypertensive heart disease		108.972	105.65	120.905		47.1057	61.8666		0.0663139	0.0185876	16.0114	20.1835	72.6925
2015			3.	Ischaemic heart disease		1830.24	1818.91	1914.92		898.012	932.226		0.0135518	0.0115807	216.01	308.07	1306.13
2015			4.	Cerebrovascular disease		1106.79	1100.21	1153.39		458.74	648.046		0.66813	0.424254	98.0429	163.63	844.02
2015			5.	Inflammatory heart diseases		67.8009	66.183	75.4512		38.2199	29.581		0.60227	0.111654	17.9893	9.41794	39.6797
2015		H.	Respiratory diseases			201.823	188.932	219.731		122.345	79.4781		1.99819	0.482432	29.1904	38.4564	131.696
2015			1.	Chronic obstructive pulmonary disease		137.988	129.146	151.69		84.0711	53.9169		0.0751274	0.0424066	14.7688	25.62	97.4816
2015			2.	Asthma		31.2212	29.4986	33.0666		18.6225	12.5987		0.10681	0.0730126	5.02114	6.86663	19.1536
2015		I.	Digestive diseases			187.856	168.209	215.707		107.978	79.8778		0.722649	0.362246	80.5891	40.5228	65.659
2015			1.	Peptic ulcer disease		20.9555	19.1507	23.2226		13.6154	7.34017		0.00339048	0.0402414	7.12766	4.31585	9.46838
2015			2.	Cirrhosis of the liver		90.3137	79.3828	107.227		54.7363	35.5773		0.0666933	0.142783	47.9747	21.8728	20.2567
2015		J.	Genitourinary diseases			50.0493	47.932	54.3582		27.893	22.1563		0.28804	0.297327	15.7405	10.1354	23.5881
2015			1.	Nephritis and nephrosis		34.8059	33.149	37.8922		18.2396	16.5663		0.17446	0.197532	11.9205	7.17076	15.3426
2015			2.	Benign prostatic hypertrophy		4.01218	3.99844	4.13187		4.01218	0		0	0	0.102486	0.583521	3.32617
2015		K.	Skin diseases			2.75949	2.675	3.0019		1.28609	1.47339		0.0227537	0.0162242	1.3836	0.530354	0.806556
2015		L.	Musculoskeletal diseases			4.97575	4.80017	5.42593		1.65543	3.32032		0.0426231	0.0748393	2.17805	1.12398	1.55626
2015			1.	Rheumatoid arthritis		1.7965	1.73744	1.94288		0.386525	1.40998		0.00562962	0.00914691	0.540988	0.514938	0.725802
2015			2.	Osteoarthritis		0.145961	0.142737	0.15614		0.0622539	0.0837067		0.00137058	0.000316301	0.025532	0.0345968	0.0841449
2015		M.	Congenital anomalies			19.1649	17.6205	21.9842		10.6362	8.52867		16.031	0.553273	2.09106	0.245131	0.24442
2015		N.	Oral conditions			0.033912	0.0330035	0.0364798		0.0189176	0.0149943		0	0	0.0123285	0.00583293	0.0157506
2015	III.	Injuries				520.878	504.962	569.459		382.328	138.549		8.19799	8.71058	375.485	61.0445	67.4397
2015		A.	Unintentional injuries			319.211	308.457	363.793		224.321	94.89		7.54461	6.77227	215.794	41.519	47.5815
2015			1.	Road traffic accidents		79.3703	78.208	79.5554		56.3697	23.0006		1.22252	2.67252	59.5549	7.45011	8.47029
2015			2.	Poisonings		71.408	68.6143	89.4439		49.9192	21.4888		0.63099	0.41273	53.9169	10.9799	5.46746
2015			3.	Falls		33.9617	33.489	35.6794		20.6068	13.355		0.408761	0.304012	13.4286	4.40073	15.4196
2015			4.	Fires		16.9649	16.5222	19.0754		10.8669	6.09795		0.649121	0.279248	9.50026	2.6191	3.91713
2015			5.	Drownings		23.031	21.7548	28.5117		18.0941	4.93692		1.27252	1.26894	16.1417	2.32456	2.02329
2015			6.	Other unintentional injuries		94.4752	89.8687	111.527		68.4645	26.0107		3.36069	1.83483	63.2513	13.7446	12.2838
2015		B.	Intentional injuries			201.667	196.505	205.665		158.007	43.6594		0.653384	1.93831	159.691	19.5255	19.8582
2015			1.	Self-inflicted injuries		113.315	111.767	115.103		92.419	20.896		0.00543107	1.15745	86.8127	11.7157	13.6237
2015			2.	Violence		71.864	70.3985	74.3055		51.2863	20.5777		0.605195	0.603271	58.4489	6.85769	5.34893
2015			3.	War		15.5734	13.4663	15.2793		13.7407	1.83271		0.0394056	0.17556	13.5392	0.936373	0.882898
2030	Population (millions)					431.538	437.885	421.496		191.98	239.557		24.1289	51.2694	267.458	42.5125	46.1687
2030		All Causes				5352.28	5058.51	5711.5		2511.92	2840.36		51.7491	15.108	1173.17	769.999	3342.25
2030	I.	Communicable, maternal, perinatal and nutritional conditions				328.797	187.563	368.895		207.084	121.713		30.3272	3.9951	236.588	22.5974	35.2894
2030		A.	Infectious and parasitic diseases			259.792	139.674	273.072		169.492	90.3001		4.91398	3.28541	224.797	17.4335	9.36229
2030			1.	Tuberculosis		29.7763	9.07206	37.9378		23.0743	6.70197		0.0627458	0.0445329	24.1818	3.00239	2.48487
2030			2.	STDs excluding HIV		0.23371	0.151885	0.344221		0.104072	0.129638		0.0619058	0.000225004	0.0370296	0.0113566	0.123193
2030			3.	HIV/AIDS		217.535	123.02	214.452		140.046	77.4891		0.99924	2.92865	197.744	13.3703	2.49274
2030			4.	Diarrhoeal diseases		3.26487	1.7427	5.87215		1.63479	1.63008		1.81228	0.038902	0.41865	0.13582	0.859226
2030			5.	Childhood-cluster diseases		0.477519	0.247098	1.02125		0.247464	0.230055		0.311538	0.0860105	0.0199245	0.0084543	0.0515923
2030				a.	Pertussis	0.0133709	0.00552567	0.0294234		0.00700969	0.00636121		0.0132224	0	0.000148493	0	0
2030				d.	Measles	0.375726	0.178484	0.867192		0.209959	0.165768		0.293458	0.0815695	0.000323357	0.000375814	0
2030				e.	Tetanus	0.0576648	0.0439336	0.0686652		0.0174288	0.0402359		0.00351898	0.000301577	0.00284606	0.0066159	0.0443822
2030			6.	Meningitis		2.41789	1.46149	4.13745		1.27425	1.14364		0.826185	0.0679798	0.56921	0.222052	0.732462
2030			7.	Hepatitis B and C		1.24769	0.712713	2.09533		0.635922	0.611766		0.147888	0.0408742	0.613753	0.151106	0.294065
2030			8.	Malaria		0.0183431	0.00732166	0.0359321		0.00913263	0.00921043		0.0140785	0.000153811	0.00232765	0.00089842	0.000884713
2030			9.	Tropical-cluster diseases		0.0468249	0.0335452	0.0703579		0.0423944	0.00443048		0.00191617	0.000229379	0.00500563	0.00941929	0.0302544
2030			10.	Leprosy		0.0244986	0.0194565	0.027878		0.0227414	0.00175712		0	0	0.000188141	0.00286069	0.0214497
2030			11.	Dengue		0	0	0		0	0		0	0	0	0	0
2030			12.	Japanese encephalitis		0	0	0		0	0		0	0	0	0	0
2030			13.	Trachoma		0	0	0		0	0		0	0	0	0	0
2030			14.	Intestinal nematode infections		0.0440116	0.0371455	0.0471071		0.0423764	0.00163522		0.000396923	0	0.00189579	0.00176964	0.0399493
2030		B.	Respiratory infections			48.3211	33.6603	65.3316		26.0459	22.2752		7.05311	0.666892	10.8043	4.93796	24.8589
2030		C.	Maternal conditions			0.419154	0.178753	0.930822		0	0.419154		0	0	0.419154	0	0
2030		D.	Perinatal conditions			18.2236	12.7268	26.6342		10.6743	7.54938		18.2217	0.00015071	0.00026397	0	0.00148412
2030		E.	Nutritional deficiencies			2.041	1.32321	2.92614		0.871884	1.16912		0.138382	0.0426418	0.567317	0.225952	1.06671
2030			1.	Protein-energy malnutrition		0.700207	0.440851	1.00661		0.298762	0.401445		0.0407359	0.0110514	0.247822	0.0810797	0.319518
2030			2.	Iodine deficiency		0.0132965	0.00780772	0.0182991		0.0035622	0.00973431		0.000284888	0.000470127	0.00494476	0.000925583	0.00667116
2030			3.	Vitamin A deficiency		0.00246215	0.0015871	0.00356543		0.000215701	0.00224645		8.45514e-06	2.52313e-05	0.000992251	0.00038197	0.00105425
2030			4.	Iron-deficiency anaemia		1.137	0.759155	1.63863		0.484765	0.652233		0.0835104	0.0254749	0.266345	0.120958	0.640709
2030	II.	Noncommunicable diseases				4583.23	4459.21	4836.55		1998.11	2585.12		16.1251	4.75236	630.945	698.746	3232.66
2030		A.	Malignant neoplasms			795.594	801.216	740.583		400.036	395.558		0.977151	1.85456	190.52	191.317	410.924
2030			1.	Mouth and oropharynx cancers		21.5197	21.7402	19.9747		16.0429	5.47671		0.0112147	0.0282408	8.48476	5.3948	7.60063
2030			2.	Oesophagus cancer		19.8668	19.6899	18.4399		12.6319	7.23485		0.00195721	0.00203425	4.85998	5.61811	9.3847
2030			3.	Stomach cancer		91.6973	92.4492	82.9677		48.5074	43.1899		0.00791123	0.0117916	19.0914	21.8658	50.7204
2030			4.	Colon and rectum cancers		93.9245	95.4944	81.9468		43.6931	50.2314		0.00508999	0.00747922	14.7052	19.0487	60.158
2030			5.	Liver cancer		26.7697	26.833	24.5205		14.5665	12.2032		0.033028	0.0214342	5.59273	6.94639	14.1762
2030			6.	Pancreas cancer		33.5144	33.8664	30.154		15.9651	17.5493		0.000898963	0.00397585	6.75157	7.82505	18.9329
2030			7.	Trachea, bronchus, lung cancers		162.707	164.623	162.008		110.678	52.0283		0	0	39.7402	47.0451	75.9214
2030			8.	Melanoma and other skin cancers		10.7745	10.8048	9.90266		5.03696	5.73756		0.000393963	0.00481271	2.73381	1.75071	6.2848
2030			9.	Breast cancer		63.3259	62.2623	60.5109		0.609242	62.7166		0.00127577	0.00485529	21.2451	14.781	27.2937
2030			10.	Cervix uteri cancer		17.3827	16.8678	17.092		0	17.3827		0	0.000999444	6.89772	3.65967	6.82433
2030			11.	Corpus uteri cancer		17.026	16.7989	16.0401		0	17.026		0.000543412	0	3.55716	4.59209	8.87621
2030			12.	Ovary cancer		19.5583	19.0885	18.6278		0	19.5583		0.00370161	0.0206264	5.72034	5.24137	8.57228
2030			13.	Prostate cancer		30.034	31.4672	24.5229		30.034	0		0.000572949	0.00379155	1.47991	4.46097	24.0888
2030			14.	Bladder cancer		25.9741	26.827	22.6245		19.7478	6.22635		0.00649945	0.00498938	2.93852	5.34621	17.6779
2030			15.	Lymphomas, multiple myeloma		22.0887	22.1679	20.5347		11.2285	10.8602		0.0723248	0.250199	7.40349	5.14329	9.21941
2030			16.	Leukaemia		24.4378	24.5219	22.7468		12.6567	11.7812		0.388898	0.730403	7.55284	4.98105	10.7846
2030		B.	Other neoplasms			7.80439	7.88364	7.21872		3.53793	4.26647		0.0751215	0.0584214	2.10792	1.50516	4.05777
2030		C.	Diabetes mellitus			58.9528	52.7209	63.5224		22.3199	36.6329		0.0257675	0.0638911	11.8632	15.4674	31.5326
2030		D.	Endocrine disorders			4.34901	4.02269	4.93273		1.97353	2.37548		0.249687	0.0999253	1.60432	0.656147	1.73893
2030		E.	Neuropsychiatric conditions			54.3483	50.8298	60.9429		32.1875	22.1608		1.28456	1.09436	28.5942	6.46696	16.9083
2030			1.	Unipolar depressive disorders		0.0530717	0.0488648	0.0612062		0.0235716	0.0295002		0.00102171	0.000644815	0.0336313	0.00594468	0.0118292
2030			2.	Bipolar disorder		0.00488237	0.00451728	0.0054554		0	0.00488237		5.34303e-05	3.72021e-05	0.000389491	0.00174924	0.00265301
2030			3.	Schizophrenia		1.03412	0.966786	1.17039		0.520909	0.513215		0.0129894	0.00807602	0.630452	0.182019	0.200588
2030			4.	Epilepsy		6.29211	5.68478	7.24497		3.95502	2.33709		0.136899	0.253065	4.82351	0.548874	0.529765
2030			5.	Alcohol use disorders		9.05459	8.57339	10.3551		7.33321	1.72137		0.0335383	0.0128275	6.78595	1.55379	0.668483
2030			6.	Alzheimer and other dementias		11.0111	10.5945	11.638		4.39438	6.61676		0.112938	0.0715267	1.79604	1.20702	7.82361
2030			7.	Parkinson disease		3.83845	3.71263	4.0027		1.91677	1.92167		0.0446737	0.0279986	0.455298	0.516395	2.79408
2030			8.	Multiple sclerosis		2.92917	2.74276	3.3115		1.21788	1.71129		0.0148105	0.00788317	1.59423	0.392713	0.919541
2030			9.	Drug use disorders		6.12926	5.63259	7.32377		4.98905	1.1402		0.0140705	0.00525551	5.88966	0.11129	0.108981
2030			10.	Post-traumatic stress disorder		0.0124238	0.0116046	0.0134867		0.00249313	0.00993065		0.00020754	0.000119996	0.00369686	0.00225111	0.00614827
2030			11.	Obsessive-compulsive disorder		0	0	0		0	0		0	0	0	0	0
2030			12.	Panic disorder		0	0	0		0	0		0	0	0	0	0
2030			13.	Insomnia (primary)		0	0	0		0	0		0	0	0	0	0
2030			14.	Migraine		0	0	0		0	0		0	0	0	0	0
2030		F.	Sense organ diseases			0.183558	0.173073	0.207506		0.0985139	0.0850441		0.00987879	0.00191802	0.0750632	0.032264	0.064434
2030			1.	Glaucoma		0.00270567	0.00243972	0.00310958		0.00270567	0		0	0	0.00270567	0	0
2030			2.	Cataracts		0	0	0		0	0		0	0	0	0	0
2030			3.	Vision disorders, age-related		0	0	0		0	0		0	0	0	0	0
2030			4.	Hearing loss, adult onset		0	0	0		0	0		0	0	0	0	0
2030		G.	Cardiovascular diseases			3202.21	3139.64	3428.56		1298.54	1903.66		1.56032	0.485353	287.157	400.251	2512.75
2030			1.	Rheumatic heart disease		13.6359	12.2853	16.9238		5.20856	8.42738		0.00918992	0.0232852	5.72923	3.05088	4.82335
2030			2.	Hypertensive heart disease		110.945	106.046	124.416		43.7653	67.1801		0.049052	0.0140879	13.2036	19.8233	77.8553
2030			3.	Ischaemic heart disease		1606.09	1575.8	1713.54		693.541	912.551		0.0107759	0.00740741	158.328	229.665	1218.08
2030			4.	Cerebrovascular disease		1010.07	995.642	1062.16		366.179	643.894		0.511331	0.235449	69.555	113.013	826.757
2030			5.	Inflammatory heart diseases		61.6867	59.3126	69.497		31.2439	30.4428		0.441706	0.0670299	12.6032	7.74966	40.825
2030		H.	Respiratory diseases			216.769	194.528	243.462		111.169	105.6		1.39464	0.334254	25.6429	37.6537	151.744
2030			1.	Chronic obstructive pulmonary disease		151.508	135.655	173.134		75.7815	75.7261		0.0516128	0.0315504	13.1558	25.0829	113.186
2030			2.	Asthma		31.2932	28.635	33.1352		16.6302	14.663		0.0746086	0.0499432	4.48229	6.24043	20.4459
2030		I.	Digestive diseases			175.121	145.423	210.673		92.668	82.4528		0.327231	0.170718	66.2022	34.183	74.2377
2030			1.	Peptic ulcer disease		20.6119	17.8865	23.2659		12.3001	8.31182		0.00172267	0.0156718	6.02616	3.82923	10.7391
2030			2.	Cirrhosis of the liver		80.3812	63.822	103.66		46.242	34.1392		0.0377049	0.0762167	39.4069	18.1353	22.7252
2030		J.	Genitourinary diseases			48.7647	45.9127	53.5636		26.3139	22.4508		0.156676	0.169719	12.9178	9.69581	25.8247
2030			1.	Nephritis and nephrosis		35.1399	32.8429	38.9127		17.8485	17.2915		0.101754	0.119869	9.99986	7.19733	17.7211
2030			2.	Benign prostatic hypertrophy		3.48287	3.52578	3.3691		3.48287	0		0	0	0.0834142	0.415176	2.98428
2030		K.	Skin diseases			2.32221	2.19288	2.58869		0.997477	1.32473		0.0130659	0.010819	1.06911	0.390841	0.83837
2030		L.	Musculoskeletal diseases			4.4543	4.17953	4.9749		1.40357	3.05073		0.0249956	0.0549774	1.69909	0.927953	1.74729
2030			1.	Rheumatoid arthritis		1.74327	1.63936	1.92734		0.335773	1.4075		0.00385457	0.00713426	0.45819	0.431255	0.842836
2030			2.	Osteoarthritis		0.135053	0.130035	0.144422		0.0513509	0.0837024		0.000750924	0.000253055	0.0210222	0.0263342	0.086693
2030		M.	Congenital anomalies			12.3289	10.4598	15.2882		6.84491	5.48394		10.026	0.353437	1.48251	0.194457	0.272413
2030		N.	Oral conditions			0.0300712	0.02862	0.0326261		0.01613	0.0139411		0	0	0.00936621	0.00430632	0.0163986
2030	III.	Injuries				440.254	411.736	506.056		306.728	133.526		5.29677	6.36055	305.639	48.6555	74.3019
2030		A.	Unintentional injuries			253.426	233.11	314.267		162.614	90.8116		4.7461	4.57508	158.298	32.4095	53.3968
2030			1.	Road traffic accidents		68.6257	64.6858	75.7159		46.1772	22.4485		0.913874	2.08581	50.0826	6.39758	9.14587
2030			2.	Poisonings		49.973	44.2979	72.1649		31.5071	18.4658		0.32127	0.258948	35.4427	8.11388	5.83615
2030			3.	Falls		32.1551	31.7769	33.3726		17.0488	15.1063		0.268078	0.201837	10.1833	3.44084	18.0611
2030			4.	Fires		13.8453	13.1312	16.2274		7.79393	6.05134		0.406258	0.200735	6.90102	2.01429	4.32297
2030			5.	Drownings		15.8105	13.7862	22.2355		11.6329	4.17756		0.849314	0.717186	10.3602	1.71531	2.16851
2030			6.	Other unintentional injuries		73.016	65.4315	94.5501		48.4539	24.5621		1.98731	1.11056	45.3282	10.7276	13.8623
2030		B.	Intentional injuries			186.829	178.627	191.79		144.114	42.7147		0.550667	1.78547	147.341	16.246	20.9051
2030			1.	Self-inflicted injuries		104.212	102.524	105.639		83.6945	20.5175		0.0045119	1.04887	79.5416	9.63481	13.9823
2030			2.	Violence		68.7621	66.0655	72.7036		48.734	20.028		0.512039	0.579474	55.8121	5.83944	6.01907
2030			3.	War		12.7146	8.97037	12.1891		11.009	1.70563		0.0311328	0.155332	10.8807	0.746483	0.900993

## Sheet: High income
Deaths by cause, scenario, sex and age for the years 2002, 2015 and 2030
Source: Mathers CD, Loncar D (2006). Projections of global mortality and burden of disease from 2002 to 2030.
High Income
						Total deaths ('000)				Baseline deaths ('000)			Baseline projections ('000) by age group
Year		Cause				Baseline	Optimistic	Pessimistic		Male	Female		0-4	5-14	15-59	60-69	70+
2002	Population (millions)					932.387	932.387	932.387		458.447	473.941		55.0186	115.855	579.932	85.2012	96.3806
2002		All Causes				7847.01	7847.01	7847.01		3981.03	3865.98		68.4781	17.2465	1201.36	1075.35	5484.57
2002	I.	Communicable, maternal, perinatal and nutritional conditions				538.591	538.591	538.591		261.508	277.083		34.3349	1.05229	60.3297	40.5298	402.344
2002		A.	Infectious and parasitic diseases			148.976	148.976	148.976		80.1325	68.8434		2.56384	0.653002	43.1951	19.6844	82.8795
2002			1.	Tuberculosis		14.5216	14.5216	14.5216		9.36705	5.15456		0.0251685	0.0150455	2.52679	2.06812	9.88648
2002			2.	STDs excluding HIV		0.570508	0.570508	0.570508		0.108753	0.461755		0.0071273	0.00177084	0.123308	0.0586484	0.379653
2002			3.	HIV/AIDS		20.4127	20.4127	20.4127		15.6287	4.78399		0.0720173	0.0687076	18.8945	1.00515	0.372336
2002			4.	Diarrhoeal diseases		5.69832	5.69832	5.69832		2.19543	3.50289		0.243538	0.0157273	0.356476	0.420245	4.66233
2002			5.	Childhood-cluster diseases		0.772331	0.772331	0.772331		0.354823	0.417508		0.0495117	0.0226308	0.126154	0.137093	0.436941
2002				a.	Pertussis	0.0293158	0.0293158	0.0293158		0.0131681	0.0161478		0.0275913	0.00076537	0.000959125	0	0
2002				d.	Measles	0.0517651	0.0517651	0.0517651		0.0293923	0.0223728		0.0200079	0.019385	0.0123722	0	0
2002				e.	Tetanus	0.105702	0.105702	0.105702		0.0375534	0.0681485		0.00101062	0	0.0133353	0.0169887	0.0743672
2002			6.	Meningitis		3.93946	3.93946	3.93946		2.09214	1.84733		0.709709	0.157863	1.33574	0.519492	1.21666
2002			7.	Hepatitis B and C		17.744	17.744	17.744		10.1852	7.55881		0.0202264	0.00749282	6.84587	3.7081	7.16227
2002			8.	Malaria		0.0991013	0.0991013	0.0991013		0.0687487	0.0303526		0.00398247	0.0010072	0.0710562	0.0112788	0.0117766
2002			9.	Tropical-cluster diseases		0.0421239	0.0421239	0.0421239		0.0271915	0.0149324		0	0	0.012496	0.00619994	0.023428
2002			10.	Leprosy		0.073878	0.073878	0.073878		0.0492928	0.0245852		0	0	0.00350775	0.0105325	0.0598378
2002			11.	Dengue		0.00920399	0.00920399	0.00920399		0.00710132	0.00210267		0.000819601	0.00263873	0.00541782	0.00010928	0.00021856
2002			12.	Japanese encephalitis		0.000997335	0.000997335	0.000997335		0	0.000997335		0	0	0	0	0.000997335
2002			13.	Trachoma		0	0	0		0	0		0	0	0	0	0
2002			14.	Intestinal nematode infections		0.0267732	0.0267732	0.0267732		0.0166406	0.0101327		6.40769e-05	0	0.00657423	0.00793664	0.0121983
2002		B.	Respiratory infections			340.175	340.175	340.175		157.611	182.564		1.47064	0.324964	15.0378	19.7386	303.603
2002		C.	Maternal conditions			0.968319	0.968319	0.968319		0	0.968319		0	0	0.965335	0.00196723	0.00101593
2002		D.	Perinatal conditions			30.3698	30.3698	30.3698		17.2476	13.1222		30.242	0.0589546	0.0633801	0.00450028	0.00098249
2002		E.	Nutritional deficiencies			18.1018	18.1018	18.1018		6.51695	11.5849		0.0584097	0.0153676	1.06813	1.1003	15.8596
			1.	Protein-energy malnutrition		9.02319	9.02319	9.02319		3.34234	5.68085		0.0240152	0.00479002	0.605675	0.610846	7.77786
			2.	Iodine deficiency		0.0105432	0.0105432	0.0105432		0.00439511	0.00614812		0.0034143	0	0	0	0.00712893
			3.	Vitamin A deficiency		0.00701657	0.00701657	0.00701657		0.00157767	0.0054389		0	0	0	0	0.00701657
			4.	Iron-deficiency anaemia		7.06959	7.06959	7.06959		2.36812	4.70146		0.0158047	0.00605267	0.289819	0.343269	6.41464
2002	II.	Noncommunicable diseases				6843.23	6843.23	6843.23		3409.17	3434.06		27.0213	8.5484	887.493	986.927	4933.24
2002		A.	Malignant neoplasms			2056.64	2056.64	2056.64		1152.15	904.493		1.59374	3.09867	391.213	448.959	1211.77
2002			1.	Mouth and oropharynx cancers		40.0015	40.0015	40.0015		29.4109	10.5905		0.0112007	0.0127623	13.9685	10.1408	15.8682
2002			2.	Oesophagus cancer		57.6057	57.6057	57.6057		44.3664	13.2393		0.000974956	0	13.0546	15.6801	28.8701
2002			3.	Stomach cancer		142.195	142.195	142.195		87.1886	55.0067		0	0.00611387	24.0472	30.2469	87.8951
2002			4.	Colon and rectum cancers		256.364	256.364	256.364		132.872	123.492		0.00114812	0.00804106	37.1851	51.0748	168.095
2002			5.	Liver cancer		103.59	103.59	103.59		70.1793	33.4111		0.0850343	0.0469223	20.3743	27.4815	55.6026
2002			6.	Pancreas cancer		110.197	110.197	110.197		55.9482	54.2491		0.00309232	0.00426824	17.9175	25.0206	67.2518
2002			7.	Trachea, bronchus, lung cancers		455.853	455.853	455.853		309.916	145.936		0.00965368	0.0104925	82.4018	118.5	254.931
2002			8.	Melanoma and other skin cancers		29.8836	29.8836	29.8836		17.4463	12.4373		0.00649584	0.0114582	8.92194	5.63843	15.3052
2002			9.	Breast cancer		152.313	152.313	152.313		1.55391	150.759		0	0.00264905	47.7124	30.0359	74.562
2002			10.	Cervix uteri cancer		16.4259	16.4259	16.4259		0	16.4259		0	0.00105036	7.54666	2.88317	5.99507
2002			11.	Corpus uteri cancer		26.6471	26.6471	26.6471		0	26.6471		0	0.00100653	4.44077	5.53422	16.6711
2002			12.	Ovary cancer		45.6599	45.6599	45.6599		0	45.6599		4.1611e-06	0.0139257	11.4577	10.47	23.7182
2002			13.	Prostate cancer		119.079	119.079	119.079		119.079	0		8.802e-07	0.000898086	3.65453	15.6742	99.7489
2002			14.	Bladder cancer		58.6935	58.6935	58.6935		41.6234	17.0701		0.00164982	0.00500724	4.59983	9.52885	44.5582
2002			15.	Lymphomas, multiple myeloma		113.852	113.852	113.852		59.6347	54.217		0.0541125	0.184584	20.8649	23.0579	69.6901
2002			16.	Leukaemia		72.6815	72.6815	72.6815		40.5637	32.1178		0.570042	1.09611	15.3125	12.7576	42.9453
2002		B.	Other neoplasms			58.4808	58.4808	58.4808		29.0155	29.4653		0.371799	0.338052	7.64567	7.95854	42.1668
2002		C.	Diabetes mellitus			207.756	207.756	207.756		93.46	114.296		0.0184941	0.0453759	25.6318	33.639	148.421
2002		D.	Endocrine disorders			71.3994	71.3994	71.3994		31.0652	40.3342		1.48897	0.66011	14.0615	8.29708	46.8917
2002		E.	Neuropsychiatric conditions			389.747	389.747	389.747		164.721	225.026		2.04621	1.45847	55.4953	28.6175	302.13
2002			1.	Unipolar depressive disorders		2.79158	2.79158	2.79158		0.959513	1.83207		0.00826248	0	0.311537	0.176942	2.29484
2002			2.	Bipolar disorder		0.420353	0.420353	0.420353		0.13155	0.288803		0	0	0.0712764	0.0558248	0.293252
2002			3.	Schizophrenia		1.93152	1.93152	1.93152		0.878609	1.05291		0	0	0.579167	0.273711	1.07864
2002			4.	Epilepsy		9.08329	9.08329	9.08329		5.37596	3.70734		0.201669	0.221203	4.80677	1.01131	2.84234
2002			5.	Alcohol use disorders		23.0174	23.0174	23.0174		18.4896	4.52778		0.00325273	0.00302805	14.6692	4.89614	3.44582
2002			6.	Alzheimer and other dementias		215.833	215.833	215.833		66.5822	149.25		0.184491	0.11558	1.84194	6.67732	207.013
2002			7.	Parkinson disease		46.1938	46.1938	46.1938		24.7798	21.414		0.00119136	0	0.528741	2.72267	42.9412
2002			8.	Multiple sclerosis		7.77926	7.77926	7.77926		2.84212	4.93714		0	0.000997732	3.92854	1.73911	2.11062
2002			9.	Drug use disorders		12.6895	12.6895	12.6895		9.93216	2.7573		0.00352198	0.0105526	12.3983	0.154758	0.122296
2002			10.	Post-traumatic stress disorder		0.0177949	0.0177949	0.0177949		0.0103515	0.00744345		0	0	0.00596715	0.00252605	0.00930172
2002			11.	Obsessive-compulsive disorder		0	0	0		0	0		0	0	0	0	0
2002			12.	Panic disorder		0	0	0		0	0		0	0	0	0	0
2002			13.	Insomnia (primary)		0	0	0		0	0		0	0	0	0	0
2002			14.	Migraine		0	0	0		0	0		0	0	0	0	0
2002		F.	Sense organ diseases			0.272034	0.272034	0.272034		0.136931	0.135104		0.00315077	0.00207756	0.0550412	0.0301556	0.181609
2002			1.	Glaucoma		0.038596	0.038596	0.038596		0.0188731	0.019723		0	0	0.00202006	0.00315344	0.0334225
2002			2.	Cataracts		0	0	0		0	0		0	0	0	0	0
2002			3.	Vision disorders, age-related		0	0	0		0	0		0	0	0	0	0
2002			4.	Hearing loss, adult onset		0	0	0		0	0		0	0	0	0	0
2002		G.	Cardiovascular diseases			2988.4	2988.4	2988.4		1390.33	1598.07		2.05185	0.94396	257.954	323.76	2403.69
2002			1.	Rheumatic heart disease		17.045	17.045	17.045		5.279	11.766		0.0200439	0.0115008	1.9373	2.55837	12.5178
2002			2.	Hypertensive heart disease		125.614	125.614	125.614		47.0583	78.5554		0.00781937	0.0125877	11.4353	12.4064	101.752
2002			3.	Ischaemic heart disease		1339.59	1339.59	1339.59		703.759	635.835		0.0597939	0.0313552	129.075	176.264	1034.16
2002			4.	Cerebrovascular disease		765.873	765.873	765.873		317.229	448.644		0.331191	0.238119	52.6536	69.5818	643.068
2002			5.	Inflammatory heart diseases		70.8974	70.8974	70.8974		40.6152	30.2822		0.558484	0.229491	15.0629	11.525	43.5214
2002		H.	Respiratory diseases			489.748	489.748	489.748		266.65	223.098		1.04563	0.448902	31.1152	59.373	397.765
2002			1.	Chronic obstructive pulmonary disease		304.216	304.216	304.216		173.622	130.594		0.0809156	0.0252786	14.3505	39.6086	250.151
2002			2.	Asthma		27.8201	27.8201	27.8201		12.2212	15.5989		0.121208	0.213377	4.99456	3.70106	18.7899
2002		I.	Digestive diseases			333.344	333.344	333.344		175.868	157.476		1.13227	0.285346	79.3141	53.8332	198.779
2002			1.	Peptic ulcer disease		26.585	26.585	26.585		13.1056	13.4794		0.00977442	0.00483191	2.78743	3.23014	20.5528
2002			2.	Cirrhosis of the liver		116.916	116.916	116.916		79.7207	37.1958		0.0200844	0.0154726	53.096	29.292	34.4929
2002		J.	Genitourinary diseases			158.409	158.409	158.409		72.3886	86.0208		0.348777	0.0892952	11.4873	14.9403	131.544
2002			1.	Nephritis and nephrosis		114.622	114.622	114.622		54.6872	59.9344		0.307364	0.0787421	9.50857	12.2311	92.4958
2002			2.	Benign prostatic hypertrophy		2.24046	2.24046	2.24046		2.24046	0		0	0	0.0230379	0.0994862	2.11793
2002		K.	Skin diseases			14.9982	14.9982	14.9982		4.85794	10.1403		0.0184324	0.00709939	1.04028	1.0175	12.9149
2002		L.	Musculoskeletal diseases			45.033	45.033	45.033		13.4622	31.5708		0.0570566	0.0761813	5.93387	5.12988	33.836
2002			1.	Rheumatoid arthritis		9.23417	9.23417	9.23417		2.14599	7.08818		0.00119136	0.00419293	0.643204	1.41584	7.16974
2002			2.	Osteoarthritis		3.02497	3.02497	3.02497		0.818516	2.20646		0	0.00104336	0.0627919	0.150695	2.81044
2002		M.	Congenital anomalies			28.6273	28.6273	28.6273		14.9285	13.6987		16.8407	1.09487	6.4956	1.35307	2.843
2002		N.	Oral conditions			0.36798	0.36798	0.36798		0.139938	0.228042		0.00412261	0	0.0497618	0.0188818	0.295213
2002	III.	Injuries				465.19	465.19	465.19		310.35	154.84		7.12198	7.64584	253.539	47.895	148.989
2002		A.	Unintentional injuries			319.115	319.115	319.115		200.83	118.285		6.08155	6.52423	148.516	30.8299	127.163
2002			1.	Road traffic accidents		118.319	118.319	118.319		84.5491	33.7696		1.66488	3.674	82.8186	11.1291	19.0322
2002			2.	Poisonings		21.6461	21.6461	21.6461		15.1029	6.54315		0.0950716	0.09641	18.403	1.1197	1.9319
2002			3.	Falls		71.259	71.259	71.259		34.6107	36.6483		0.310146	0.225173	11.6475	6.05142	53.0248
2002			4.	Fires		9.20441	9.20441	9.20441		5.65922	3.54519		0.553069	0.466801	4.03101	1.07549	3.07803
2002			5.	Drownings		15.5993	15.5993	15.5993		10.9053	4.69399		1.17232	0.817139	6.98946	1.74056	4.87981
2002			6.	Other unintentional injuries		83.0876	83.0876	83.0876		50.0025	33.0851		2.28607	1.24471	24.6267	9.7137	45.2165
2002		B.	Intentional injuries			146.075	146.075	146.075		109.52	36.5549		1.04043	1.12161	105.023	17.065	21.8254
2002			1.	Self-inflicted injuries		122.819	122.819	122.819		92.4039	30.4151		0	0.55951	85.5609	16.0338	20.6648
2002			2.	Violence		22.2719	22.2719	22.2719		16.2126	6.05938		1.03926	0.550639	18.5722	0.987685	1.12219
2002			3.	War		0.554504	0.554504	0.554504		0.499874	0.0546306		0.00117291	0.0072293	0.493423	0.033558	0.0191214
2015	Population (millions)					975.884	977.468	974.029		473.468	502.416		53.769	110.487	582.332	109.15	120.145
2015		All Causes				8938.51	8716.68	9190.24		4539.88	4398.63		44.7469	12.2515	1092.47	1143.51	6645.53
2015	I.	Communicable, maternal, perinatal and nutritional conditions				538.814	495.949	564.376		269.138	269.676		19.2977	0.578412	46.4166	33.4645	439.057
2015		A.	Infectious and parasitic diseases			138.423	126.369	145.068		73.9523	64.4711		0.937947	0.363868	34.7994	16.1646	86.1576
2015			1.	Tuberculosis		11.3224	10.7112	12.4396		6.68232	4.64012		0.00806779	0.00527445	0.928468	0.962149	9.41848
2015			2.	STDs excluding HIV		0.519935	0.475924	0.549581		0.0926862	0.427248		0.00235278	0.000899513	0.0736147	0.0519837	0.391084
2015			3.	HIV/AIDS		22.0765	19.2555	22.176		16.9433	5.13322		0.0593217	0.0694648	20.0865	1.43961	0.421661
2015			4.	Diarrhoeal diseases		5.8359	5.40326	6.06746		2.2804	3.55549		0.0850172	0.00745691	0.21495	0.347271	5.1812
2015			5.	Childhood-cluster diseases		0.648514	0.592358	0.688641		0.297506	0.351008		0.0161282	0.00903238	0.0792552	0.119205	0.424893
2015				a.	Pertussis	0.010719	0.00824787	0.013745		0.00480627	0.00591273		0.00982288	0.000348844	0.000547272	0	0
2015				d.	Measles	0.0199367	0.0162716	0.0267672		0.0114901	0.00844662		0.00580656	0.00777576	0.00635441	0	0
2015				e.	Tetanus	0.090399	0.0829825	0.0977681		0.0314412	0.0589578		0.000209614	0	0.00765611	0.0115583	0.0709749
2015			6.	Meningitis		2.71792	2.38254	3.04983		1.41487	1.30305		0.238695	0.0808638	0.795783	0.400636	1.20195
2015			7.	Hepatitis B and C		14.3512	12.8981	15.6912		7.75937	6.59185		0.00674215	0.00358978	4.3227	2.82786	7.19034
2015			8.	Malaria		0.0621829	0.0525065	0.0733193		0.0435586	0.0186243		0.00121856	0.000466971	0.040849	0.00783568	0.0118127
2015			9.	Tropical-cluster diseases		0.0363737	0.0326972	0.0399662		0.0229916	0.0133821		0	0	0.00804204	0.00412711	0.0242046
2015			10.	Leprosy		0.0999592	0.0928647	0.100766		0.0656629	0.0342962		0	0	0.00248709	0.00643336	0.0910387
2015			11.	Dengue		0.00514375	0.00435647	0.0062706		0.00399675	0.001147		0.000252685	0.00100406	0.00349975	0.000174276	0.000212985
2015			12.	Japanese encephalitis		0.000949988	0.000878738	0.00098979		0	0.000949988		0	0	0	0	0.000949988
2015			13.	Trachoma		0	0	0		0	0		0	0	0	0	0
2015			14.	Intestinal nematode infections		0.0247086	0.0225174	0.0261901		0.0153039	0.00940468		1.59142e-05	0	0.00449676	0.00768153	0.0125144
2015		B.	Respiratory infections			364.615	337.57	380.066		178.599	186.015		0.528715	0.172161	10.4619	16.4133	337.039
2015		C.	Maternal conditions			0.459622	0.371059	0.569727		0	0.459622		0	0	0.456804	0.00145003	0.00136782
2015		D.	Perinatal conditions			17.8865	15.7651	20.529		10.178	7.70854		17.8109	0.0336892	0.0372866	0.00371962	0.000940021
2015		E.	Nutritional deficiencies			17.4296	15.8728	18.143		6.40859	11.021		0.0201324	0.00869379	0.661171	0.881408	15.8582
2015			1.	Protein-energy malnutrition		8.63465	7.87926	8.97608		3.22683	5.40782		0.00875346	0.0029224	0.369256	0.499412	7.7543
2015			2.	Iodine deficiency		0.0087867	0.00790708	0.00957909		0.00306626	0.00572044		0.00099073	0	0	0	0.00779597
2015			3.	Vitamin A deficiency		0.00678708	0.00618012	0.00720537		0.00173593	0.00505115		0	0	0	0	0.00678708
2015			4.	Iron-deficiency anaemia		6.84364	6.23	7.13328		2.40984	4.4338		0.00517426	0.00330889	0.187728	0.278663	6.36877
2015	II.	Noncommunicable diseases				7906	7745.76	8098.8		3955.7	3950.31		20.567	6.13735	816.098	1057.21	6005.99
2015		A.	Malignant neoplasms			2339.52	2340.77	2329.96		1320.85	1018.67		1.04057	2.2364	375.358	505.635	1455.25
2015			1.	Mouth and oropharynx cancers		43.5355	43.4588	43.3769		31.6181	11.9174		0.00708529	0.00847476	13.2301	11.0128	19.277
2015			2.	Oesophagus cancer		64.291	64.5029	63.6459		49.4285	14.8625		0.000662431	0	12.3136	17.3527	34.6241
2015			3.	Stomach cancer		171.283	172.289	169.041		105.301	65.9822		0	0.00401088	22.2268	31.5152	117.537
2015			4.	Colon and rectum cancers		292.656	295.065	287.92		154.842	137.813		0.000654281	0.00556457	34.8794	54.6754	203.095
2015			5.	Liver cancer		118.746	119.126	117.515		79.2644	39.4819		0.0523144	0.0328908	19.9002	29.149	69.6118
2015			6.	Pancreas cancer		125.259	125.892	123.759		64.6211	60.6382		0.00210148	0.00278908	16.7109	27.329	81.2145
2015			7.	Trachea, bronchus, lung cancers		503.977	496.569	514.809		326.494	177.482		0	0	88.2175	140.732	275.027
2015			8.	Melanoma and other skin cancers		33.3689	33.3646	33.1341		20.0541	13.3148		0.00394772	0.007894	7.9753	6.41529	18.9664
2015			9.	Breast cancer		161.317	160.898	161.301		1.85932	159.457		0	0.00192997	44.1575	34.3937	82.7634
2015			10.	Cervix uteri cancer		16.9871	16.8038	17.154		0	16.9871		0	0.000785807	6.46587	3.3958	7.12468
2015			11.	Corpus uteri cancer		29.9542	30.0183	29.7836		0	29.9542		0	0.000651271	4.14241	6.50323	19.3079
2015			12.	Ovary cancer		46.6997	46.564	46.625		0	46.6997		3.08952e-06	0.00935927	9.95189	11.3683	25.3702
2015			13.	Prostate cancer		155.239	157.732	151.14		155.239	0		6.43489e-07	0.000575586	3.60671	17.5167	134.115
2015			14.	Bladder cancer		72.6653	73.3789	71.4508		52.2458	20.4195		0.00113431	0.00354819	4.48283	10.4945	57.6833
2015			15.	Lymphomas, multiple myeloma		126.647	127.495	124.669		68.5044	58.1428		0.0316299	0.124938	19.5582	26.6991	80.2335
2015			16.	Leukaemia		81.5741	81.9623	80.6803		47.0445	34.5296		0.37493	0.7689	13.9532	14.9629	51.5141
2015		B.	Other neoplasms			70.4779	71.0143	69.6288		36.2337	34.2442		0.234036	0.235709	6.95202	8.90063	54.1555
2015		C.	Diabetes mellitus			360.099	343.346	375.069		164.328	195.771		0.0160078	0.0367895	46.1259	55.9557	257.965
2015		D.	Endocrine disorders			82.89	80.7349	85.5948		37.1498	45.7402		1.00467	0.480475	12.4476	9.56696	59.3903
2015		E.	Neuropsychiatric conditions			464.517	454.907	476.92		204.422	260.095		1.48664	1.08614	49.457	31.7708	380.716
2015			1.	Unipolar depressive disorders		3.39662	3.32173	3.4718		1.27222	2.12441		0.00694891	0	0.274392	0.197873	2.91741
2015			2.	Bipolar disorder		0.466132	0.452408	0.47983		0.142082	0.32405		0	0	0.0630301	0.0631905	0.339912
2015			3.	Schizophrenia		2.09675	2.03778	2.18984		0.935834	1.16092		0	0	0.507413	0.296264	1.29307
2015			4.	Epilepsy		9.12915	8.70185	9.60939		5.38294	3.74621		0.138602	0.158996	4.14797	1.04705	3.63653
2015			5.	Alcohol use disorders		22.4493	21.2594	23.8701		18.08	4.36932		0.00273416	0.00238881	13.239	5.17731	4.02791
2015			6.	Alzheimer and other dementias		270.416	266.752	275.627		93.4808	176.935		0.134801	0.0845144	1.69294	7.45215	261.052
2015			7.	Parkinson disease		59.1549	58.3885	60.1336		33.9951	25.1597		0.000998446	0	0.492598	3.02679	55.6345
2015			8.	Multiple sclerosis		7.93757	7.57176	8.35808		2.94585	4.99171		0	0.000678983	3.59097	2.00097	2.34495
2015			9.	Drug use disorders		11.0804	10.2792	12.0294		8.71206	2.3683		0.00287596	0.00790533	10.7268	0.189838	0.152935
2015			10.	Post-traumatic stress disorder		0.0207779	0.0205459	0.022358		0.0118097	0.00896826		0	0	0.00634497	0.00245054	0.0119824
2015			11.	Obsessive-compulsive disorder		0	0	0		0	0		0	0	0	0	0
2015			12.	Panic disorder		0	0	0		0	0		0	0	0	0	0
2015			13.	Insomnia (primary)		0	0	0		0	0		0	0	0	0	0
2015			14.	Migraine		0	0	0		0	0		0	0	0	0	0
2015		F.	Sense organ diseases			0.320602	0.312561	0.330024		0.165475	0.155127		0.00233248	0.00166967	0.0491677	0.033541	0.233891
2015			1.	Glaucoma		0.0520876	0.0513001	0.0532778		0.025772	0.0263156		0	0	0.00196706	0.00377949	0.046341
2015			2.	Cataracts		0	0	0		0	0		0	0	0	0	0
2015			3.	Vision disorders, age-related		0	0	0		0	0		0	0	0	0	0
2015			4.	Hearing loss, adult onset		0	0	0		0	0		0	0	0	0	0
2015		G.	Cardiovascular diseases			3297.18	3223.37	3410.4		1534.54	1762.64		1.7943	0.650494	204.419	301.106	2789.21
2015			1.	Rheumatic heart disease		18.1336	17.4166	19.157		5.75492	12.3786		0.0179363	0.00727362	1.45708	2.35098	14.3003
2015			2.	Hypertensive heart disease		141.822	137.227	150.276		54.911	86.9114		0.00697048	0.00980264	8.29181	11.4734	122.04
2015			3.	Ischaemic heart disease		1465.83	1437.9	1510.99		756.217	709.61		0.0574989	0.0234133	107.861	170.069	1187.82
2015			4.	Cerebrovascular disease		818.338	806.997	837.957		340.983	477.354		0.294931	0.162717	37.8537	58.2562	721.77
2015			5.	Inflammatory heart diseases		72.2298	69.2698	77.1265		41.1923	31.0375		0.483416	0.156484	11.6958	11.0092	48.885
2015		H.	Respiratory diseases			596.575	567.622	626.447		323.081	273.495		0.861177	0.358849	25.7929	62.6696	506.893
2015			1.	Chronic obstructive pulmonary disease		357.587	338.844	377.544		201.325	156.261		0.0659066	0.019354	11.2619	41.1746	305.065
2015			2.	Asthma		36.9786	35.1289	38.9125		16.4248	20.5537		0.0961854	0.173539	4.38039	3.95893	28.3695
2015		I.	Digestive diseases			395.899	371.599	417.399		200.692	195.207		0.595809	0.141351	73.9168	56.0429	265.202
2015			1.	Peptic ulcer disease		34.1643	32.7313	35.1364		16.7609	17.4034		0.00541251	0.0022555	2.62669	3.43687	28.0931
2015			2.	Cirrhosis of the liver		119.558	107.383	133.043		79.7432	39.8144		0.0113938	0.00665081	49.1015	28.5903	41.8477
2015		J.	Genitourinary diseases			200.376	196.78	205.403		97.3943	102.982		0.237534	0.0525522	9.65801	16.9603	173.468
2015			1.	Nephritis and nephrosis		145.545	142.824	149.396		72.7752	72.7697		0.210001	0.0460412	8.01555	13.8794	123.394
2015			2.	Benign prostatic hypertrophy		3.40445	3.3881	3.4404		3.40445	0		0	0	0.0221508	0.1152	3.2671
2015		K.	Skin diseases			19.1192	18.7722	19.5593		6.64291	12.4763		0.0130803	0.00509344	0.948395	1.1795	16.9731
2015		L.	Musculoskeletal diseases			53.8782	52.7243	55.5204		17.1067	36.7715		0.0407698	0.0600196	5.27605	5.78925	42.7121
2015			1.	Rheumatoid arthritis		10.6956	10.4456	11.0056		2.58367	8.11196		0.000950441	0.00330657	0.57833	1.57283	8.54021
2015			2.	Osteoarthritis		3.75044	3.69098	3.83018		1.12714	2.6233		0	0.000874886	0.0584885	0.167546	3.52353
2015		M.	Congenital anomalies			24.7064	23.3751	26.1231		12.9124	11.794		13.2368	0.791809	5.65188	1.57771	3.44812
2015		N.	Oral conditions			0.44173	0.432058	0.451944		0.178414	0.263316		0.00321494	0	0.0449526	0.0222186	0.371344
2015	III.	Injuries				493.69	474.968	527.06		315.039	178.65		4.8822	5.53574	229.951	52.835	200.486
2015		A.	Unintentional injuries			335.097	317.741	364.85		194.642	140.456		3.80982	4.47475	121.102	32.1382	173.572
2015			1.	Road traffic accidents		104.649	94.149	121.912		70.7292	33.9198		1.13474	2.66155	70.0118	10.6767	20.1642
2015			2.	Poisonings		17.8164	15.9788	21.2556		11.4513	6.3651		0.0548334	0.0657	13.8524	1.28613	2.5573
2015			3.	Falls		92.8042	92.2617	94.0183		44.4079	48.3963		0.186566	0.143822	10.1118	6.7921	75.5699
2015			4.	Fires		9.43071	8.97427	10.2163		5.45992	3.97079		0.35344	0.350503	3.29664	1.23316	4.19696
2015			5.	Drownings		14.9107	13.9953	16.6765		9.30729	5.60338		0.71284	0.452322	4.93823	1.70471	7.10257
2015			6.	Other unintentional injuries		95.4861	92.3822	100.771		53.286	42.2001		1.36739	0.800855	18.8913	10.4453	63.9813
2015		B.	Intentional injuries			158.592	157.227	162.21		120.398	38.1948		1.07238	1.06099	108.848	20.6969	26.9137
2015			1.	Self-inflicted injuries		136.77	135.508	137.811		104.473	32.2972		0	0.571545	91.0976	19.46	25.6412
2015			2.	Violence		20.5913	20.6026	22.9659		14.8016	5.78967		1.07121	0.477073	16.6686	1.16259	1.21185
2015			3.	War		0.685738	0.590466	0.870481		0.614196	0.0715419		0.00117064	0.00798319	0.589919	0.0582462	0.0284182
2030	Population (millions)					1002.89	1009.91	994.82		477.743	525.149		54.8615	110.984	553.497	123.823	159.727
2030		All Causes				9470.66	9090.73	9886.77		4479.66	4991		29.1883	8.85278	832.871	1008.65	7591.1
2030	I.	Communicable, maternal, perinatal and nutritional conditions				498.855	440.636	523.313		229.318	269.537		10.2728	0.338287	34.5437	23.1484	430.551
2030		A.	Infectious and parasitic diseases			128.907	107.992	134.452		64.7488	64.1585		0.332708	0.227079	27.8143	11.2528	89.2804
2030			1.	Tuberculosis		8.66487	7.8857	9.86339		4.57363	4.09124		0.00249343	0.00240136	0.370088	0.510826	7.77906
2030			2.	STDs excluding HIV		0.499992	0.445668	0.528149		0.0784665	0.421525		0.000717147	0.000444525	0.0373139	0.0385394	0.422977
2030			3.	HIV/AIDS		22.7038	12.6153	22.5297		17.1892	5.51458		0.0638613	0.078529	20.2482	1.69011	0.623104
2030			4.	Diarrhoeal diseases		5.74841	5.22013	5.93128		2.02212	3.7263		0.0258529	0.00304121	0.109499	0.221669	5.38835
2030			5.	Childhood-cluster diseases		0.60141	0.53696	0.632122		0.261114	0.340295		0.00478011	0.00380275	0.0398499	0.078321	0.474656
2030				a.	Pertussis	0.00332805	0.00197159	0.00539565		0.0015115	0.00181655		0.00290316	0.000188442	0.000236447	0	0
2030				d.	Measles	0.00775193	0.00528867	0.0125885		0.00468005	0.00307188		0.00173372	0.00320101	0.00281719	0	0
2030				e.	Tetanus	0.0777921	0.0689872	0.0852083		0.0249128	0.0528792		6.11154e-05	0	0.0034696	0.00775374	0.0665076
2030			6.	Meningitis		1.98806	1.66404	2.30639		0.978512	1.00955		0.0714287	0.0412148	0.399015	0.262661	1.21374
2030			7.	Hepatitis B and C		10.7942	9.22557	12.1989		5.25818	5.53605		0.00206725	0.00178027	2.29394	1.74562	6.75083
2030			8.	Malaria		0.037699	0.0290397	0.0489684		0.0253819	0.0123171		0.000297296	0.000246175	0.0190274	0.00539524	0.0127329
2030			9.	Tropical-cluster diseases		0.028299	0.0244291	0.0323237		0.0157266	0.0125724		0	0	0.00378385	0.00265506	0.0218601
2030			10.	Leprosy		0.103713	0.0929089	0.0996675		0.0612423	0.0424709		0	0	0.0013355	0.00484599	0.0975317
2030			11.	Dengue		0.00284625	0.00208662	0.0039477		0.00214784	0.000698408		6.02596e-05	0.000406618	0.00189703	0.000177717	0.000304623
2030			12.	Japanese encephalitis		0.000709453	0.000632387	0.000753051		0	0.000709453		0	0	0	0	0.000709453
2030			13.	Trachoma		0	0	0		0	0		0	0	0	0	0
2030			14.	Intestinal nematode infections		0.0208699	0.0182923	0.0223332		0.0123237	0.00854613		3.03561e-06	0	0.00253968	0.00502493	0.0133022
2030		B.	Respiratory infections			343.814	310.7	359.189		153.795	190.02		0.16649	0.0878265	6.16257	11.3648	326.033
2030		C.	Maternal conditions			0.201855	0.133167	0.297448		0	0.201855		0	0	0.199631	0.000727897	0.00149577
2030		D.	Perinatal conditions			9.81122	7.5394	12.7309		5.59366	4.21756		9.76759	0.0185589	0.020359	0.00344925	0.00127004
2030		E.	Nutritional deficiencies			16.1199	14.2724	16.6436		5.18041	10.9395		0.00603181	0.00482247	0.346871	0.526691	15.2355
2030			1.	Protein-energy malnutrition		7.98785	7.1045	8.22491		2.59329	5.39456		0.00270457	0.00164305	0.196664	0.294113	7.49272
2030			2.	Iodine deficiency		0.00822861	0.00724172	0.00874863		0.0023964	0.00583221		0.000278974	0	0	0	0.00794964
2030			3.	Vitamin A deficiency		0.00683825	0.00602064	0.00731331		0.00198024	0.00485801		0	0	0	0	0.00683825
2030			4.	Iron-deficiency anaemia		6.34706	5.61147	6.57915		1.99114	4.35592		0.00148609	0.00178911	0.0972384	0.172314	6.07423
2030	II.	Noncommunicable diseases				8456.76	8162.4	8793.48		3944.98	4511.78		15.6688	4.43387	595.995	935.004	6905.65
2030		A.	Malignant neoplasms			2446.8	2498.77	2381.33		1347.41	1099.39		0.63201	1.57111	285.718	470.437	1688.44
2030			1.	Mouth and oropharynx cancers		43.8273	44.6283	42.588		30.8678	12.9595		0.00404771	0.00546122	10.049	10.7509	23.018
2030			2.	Oesophagus cancer		67.4153	69.3094	64.6788		50.6577	16.7576		0.000371809	0	9.7289	16.4714	41.2146
2030			3.	Stomach cancer		181.41	187.318	172.602		106.837	74.5736		0	0.00244547	17.7955	30.1713	133.441
2030			4.	Colon and rectum cancers		311.283	324.085	294.326		160.366	150.917		0.000396482	0.0037928	27.1506	50.2259	233.902
2030			5.	Liver cancer		122.943	126.102	117.825		79.0282	43.9144		0.0295991	0.0218691	16.4718	27.6377	78.7816
2030			6.	Pancreas cancer		134.312	138.631	128.306		67.4614	66.8501		0.00117936	0.00179241	12.803	25.5101	95.9955
2030			7.	Trachea, bronchus, lung cancers		482.778	472.627	502.227		297.637	185.141		0	0	63.9476	121.461	297.369
2030			8.	Melanoma and other skin cancers		35.8227	36.6509	34.5391		21.6193	14.2034		0.00226976	0.00490073	6.01628	6.03755	23.7617
2030			9.	Breast cancer		165.736	167.618	162.848		2.02125	163.714		0	0.00119778	32.9003	32.4858	100.348
2030			10.	Cervix uteri cancer		16.9446	16.846	16.9284		0	16.9446		0	0.000556467	4.65234	3.36275	8.92894
2030			11.	Corpus uteri cancer		33.1857	33.8689	32.2506		0	33.1857		0	0.000450658	3.10098	6.29618	23.7881
2030			12.	Ovary cancer		46.4884	47.1232	45.4183		0	46.4884		1.80122e-06	0.00615968	6.77643	9.95248	29.7533
2030			13.	Prostate cancer		174.988	185.946	161.672		174.988	0		3.63406e-07	0.000319177	2.83503	17.1419	155.011
2030			14.	Bladder cancer		82.3225	85.914	77.8654		57.6983	24.6243		0.000722804	0.00228883	3.54034	10.3505	68.4287
2030			15.	Lymphomas, multiple myeloma		135.281	140.376	128.301		73.1752	62.1055		0.0171741	0.0793916	15.418	25.7942	93.9718
2030			16.	Leukaemia		88.2871	91.1939	84.4366		50.9722	37.3149		0.229264	0.520307	11.0304	15.0844	61.4227
2030		B.	Other neoplasms			78.9013	81.9702	75.2463		39.3437	39.5576		0.13299	0.149178	5.41936	8.60622	64.5936
2030		C.	Diabetes mellitus			435.826	400.891	463.744		193.139	242.688		0.0132333	0.0311149	37.7636	56.678	341.34
2030		D.	Endocrine disorders			94.1409	90.6594	98.2449		40.1935	53.9474		0.664267	0.357791	9.56115	8.71164	74.846
2030		E.	Neuropsychiatric conditions			551.31	536.693	568.696		230.417	320.892		1.08977	0.834127	37.7738	29.5327	482.079
2030			1.	Unipolar depressive disorders		4.03708	3.93191	4.14837		1.45916	2.57793		0.00528335	0	0.203715	0.173033	3.65505
2030			2.	Bipolar disorder		0.53257	0.509761	0.55612		0.152343	0.380227		0	0	0.0477558	0.0545964	0.430218
2030			3.	Schizophrenia		2.32798	2.23029	2.46698		0.958095	1.36988		0	0	0.376628	0.270687	1.68066
2030			4.	Epilepsy		8.72541	8.05732	9.49941		4.94817	3.77725		0.101486	0.119835	3.15938	1.00238	4.34233
2030			5.	Alcohol use disorders		19.8599	17.8661	22.2625		16.0128	3.8471		0.00207725	0.00193532	9.84065	4.9595	5.05569
2030			6.	Alzheimer and other dementias		340.667	335.536	346.821		113.786	226.881		0.0988435	0.0633034	1.26811	6.91605	332.321
2030			7.	Parkinson disease		72.7044	71.857	73.776		41.3109	31.3936		0.000755334	0	0.370855	2.83047	69.5023
2030			8.	Multiple sclerosis		7.57237	6.91777	8.30845		2.80035	4.77202		0	0.000541748	2.66496	1.8349	3.07198
2030			9.	Drug use disorders		8.84409	7.46414	10.4631		6.94535	1.89873		0.00220863	0.00649431	8.46463	0.175865	0.194886
2030			10.	Post-traumatic stress disorder		0.0246455	0.0243037	0.0265969		0.0124514	0.0121942		0	0	0.00512221	0.00293757	0.0165858
2030			11.	Obsessive-compulsive disorder		0	0	0		0	0		0	0	0	0	0
2030			12.	Panic disorder		0	0	0		0	0		0	0	0	0	0
2030			13.	Insomnia (primary)		0	0	0		0	0		0	0	0	0	0
2030			14.	Migraine		0	0	0		0	0		0	0	0	0	0
2030		F.	Sense organ diseases			0.36881	0.356979	0.382427		0.185482	0.183328		0.00171701	0.00134003	0.0377083	0.0316248	0.29642
2030			1.	Glaucoma		0.0625475	0.0615377	0.063949		0.0284464	0.0341011		0	0	0.00131061	0.00355381	0.0576831
2030			2.	Cataracts		0	0	0		0	0		0	0	0	0	0
2030			3.	Vision disorders, age-related		0	0	0		0	0		0	0	0	0	0
2030			4.	Hearing loss, adult onset		0	0	0		0	0		0	0	0	0	0
2030		G.	Cardiovascular diseases			3396.26	3198.54	3652.35		1414.51	1981.75		1.5226	0.460757	129.256	235.642	3029.38
2030			1.	Rheumatic heart disease		18.2695	16.7932	20.1753		5.15741	13.1121		0.0155171	0.00472828	0.825602	1.86155	15.5621
2030			2.	Hypertensive heart disease		149.892	140.315	164.862		52.2102	97.6822		0.00624713	0.00760854	4.72857	9.34039	135.81
2030			3.	Ischaemic heart disease		1501.03	1409.2	1619.13		692.672	808.353		0.0523153	0.0175156	69.8952	134.984	1296.08
2030			4.	Cerebrovascular disease		858.977	824.574	905.499		316.548	542.429		0.260325	0.119194	23.1913	43.6432	791.763
2030			5.	Inflammatory heart diseases		70.822	64.8191	79.5236		37.3118	33.5102		0.40816	0.108142	7.47591	8.62208	54.2077
2030		H.	Respiratory diseases			642.694	584.994	705.069		326.037	316.658		0.708944	0.295951	17.3697	50.107	574.213
2030			1.	Chronic obstructive pulmonary disease		370.235	332.587	413.845		194.714	175.521		0.0543719	0.0146673	6.59471	30.4914	333.08
2030			2.	Asthma		43.1909	39.596	46.7026		17.4719	25.719		0.0787431	0.148107	3.2754	3.88535	35.8033
2030		I.	Digestive diseases			463.61	432.225	489.814		204.221	259.389		0.267426	0.0657388	57.2269	51.7825	354.268
2030			1.	Peptic ulcer disease		42.4076	40.8363	43.0584		18.41	23.9976		0.00288292	0.00100289	2.07154	3.24631	37.0859
2030			2.	Cirrhosis of the liver		116.168	97.8832	137.853		72.2667	43.9017		0.00625597	0.00302033	37.3028	25.4544	53.4018
2030		J.	Genitourinary diseases			239.343	234.314	245.868		111.653	127.69		0.151378	0.0316248	6.5865	15.7444	216.829
2030			1.	Nephritis and nephrosis		171.978	168.115	177.063		82.4113	89.5671		0.134036	0.027464	5.47527	12.9	153.442
2030			2.	Benign prostatic hypertrophy		4.03858	4.07484	4.01072		4.03858	0		0	0	0.0147718	0.116212	3.9076
2030		K.	Skin diseases			22.8745	22.377	23.4578		7.61477	15.2598		0.00886375	0.00382695	0.73731	1.09345	21.0311
2030		L.	Musculoskeletal diseases			62.833	60.9289	65.2411		19.0216	43.8114		0.028505	0.0486607	4.08382	5.18489	53.4871
2030			1.	Rheumatoid arthritis		12.5931	12.1454	13.1082		2.90606	9.687		0.000679404	0.00258984	0.434532	1.37638	10.7789
2030			2.	Osteoarthritis		4.73637	4.6488	4.84375		1.37633	3.36004		0	0.00073698	0.042152	0.161071	4.53241
2030		M.	Congenital anomalies			21.2656	19.169	23.4997		11.0239	10.2417		10.4448	0.582647	4.42596	1.43296	4.37924
2030		N.	Oral conditions			0.525839	0.511626	0.540937		0.204088	0.321751		0.00232607	0	0.0354297	0.0202688	0.467814
2030	III.	Injuries				515.052	487.69	569.976		305.364	209.688		3.24667	4.08063	202.331	50.4964	254.897
2030		A.	Unintentional injuries			341.307	316.099	386.234		173.498	167.809		2.13928	2.95744	87.0013	28.3442	220.865
2030			1.	Road traffic accidents		82.7836	63.749	113.387		51.2532	31.5304		0.701127	1.82044	52.306	8.46707	19.489
2030			2.	Poisonings		14.2731	11.3377	19.4777		8.06579	6.20733		0.0266136	0.0446575	9.52831	1.18788	3.48565
2030			3.	Falls		112.663	113.866	112.374		49.3736	63.2894		0.114678	0.0914767	7.42562	6.78963	98.2416
2030			4.	Fires		9.58139	8.94861	10.6733		4.98798	4.59341		0.197049	0.263444	2.36357	1.16803	5.5893
2030			5.	Drownings		13.5398	12.4576	15.7821		7.1554	6.38445		0.38175	0.248295	3.03145	1.3846	8.49375
2030			6.	Other unintentional injuries		108.466	105.74	114.54		52.6621	55.8043		0.718059	0.489133	12.3463	9.34701	85.5659
2030		B.	Intentional injuries			173.745	171.591	183.741		131.866	41.8789		1.10739	1.12319	115.33	22.1522	34.0317
2030			1.	Self-inflicted injuries		150.762	148.813	152.157		115.144	35.6177		0	0.620354	97.1116	20.764	32.2661
2030			2.	Violence		21.4748	21.557	29.8439		15.3531	6.12162		1.10623	0.490659	16.9213	1.29009	1.6665
2030			3.	War		0.789408	0.544792	0.988173		0.700554	0.0888538		0.00116524	0.00783189	0.651692	0.0787625	0.049956

## Sheet: Latin America and Caribbean
Deaths by cause, scenario, sex and age for the years 2002, 2015 and 2030
Source: Mathers CD, Loncar D (2006). Projections of global mortality and burden of disease from 2002 to 2030.
Latin America and Caribbean
						Total deaths ('000)				Baseline deaths ('000)			Baseline projections ('000) by age group
Year		Cause				Baseline	Optimistic	Pessimistic		Male	Female		0-4	5-14	15-59	60-69	70+
2002	Population (millions)					529.932	529.932	529.932		262.249	267.683		55.5976	109.204	321.866	24.2321	19.033
2002		All Causes				3318.65	3318.65	3318.65		1854.32	1464.33		392.767	50.3244	1044.16	487.464	1343.93
2002	I.	Communicable, maternal, perinatal and nutritional conditions				718.819	718.819	718.819		395.625	323.194		305.819	15.0225	200.97	42.2197	154.787
2002		A.	Infectious and parasitic diseases			330.659	330.659	330.659		196.965	133.695		91.4538	10.1926	152.199	24.3658	52.448
2002			1.	Tuberculosis		44.8632	44.8632	44.8632		28.9799	15.8833		1.0479	0.781088	26.2579	7.03899	9.73728
2002			2.	STDs excluding HIV		1.61393	1.61393	1.61393		0.828923	0.785004		0.816436	0.00591606	0.511781	0.07245	0.207345
2002			3.	HIV/AIDS		91.4082	91.4082	91.4082		61.9005	29.5077		6.04522	2.56872	81.1493	1.37821	0.266726
2002			4.	Diarrhoeal diseases		54.641	54.641	54.641		28.5442	26.0968		46.2465	0.287085	2.02723	1.20999	4.87014
2002			5.	Childhood-cluster diseases		4.33059	4.33059	4.33059		2.2533	2.07729		4.07074	0.0787408	0.0985941	0.0323719	0.0501435
2002				a.	Pertussis	3.54933	3.54933	3.54933		1.78071	1.76863		3.54743	0.000973433	0.000931853	0	0
2002				d.	Measles	0.0001225	0.0001225	0.0001225		6.125e-05	6.125e-05		0.000105	1.75e-05	0	0	0
2002				e.	Tetanus	0.505005	0.505005	0.505005		0.277829	0.227176		0.335572	0.0148035	0.0796181	0.0276535	0.0473572
2002			6.	Meningitis		16.7639	16.7639	16.7639		9.79426	6.9696		8.9809	1.56915	4.12636	0.788304	1.29914
2002			7.	Hepatitis B and C		6.64696	6.64696	6.64696		3.82625	2.8207		0.519737	0.213681	3.61669	1.06677	1.23007
2002			8.	Malaria		1.50462	1.50462	1.50462		0.892333	0.612289		1.30373	0.0198597	0.121076	0.0209701	0.0389894
2002			9.	Tropical-cluster diseases		15.753	15.753	15.753		8.57286	7.18014		0.130489	0.0315094	7.6898	3.45797	4.44323
2002			10.	Leprosy		0.554747	0.554747	0.554747		0.351219	0.203528		0	0.0013148	0.223525	0.0921653	0.237742
2002			11.	Dengue		2.09825	2.09825	2.09825		1.06629	1.03196		0.390681	1.29141	0.247872	0.0562513	0.112035
2002			12.	Japanese encephalitis		0	0	0		0	0		0	0	0	0	0
2002			13.	Trachoma		0.0109053	0.0109053	0.0109053		0.0109053	0		0.00800521	0.00290009	0	0	0
2002			14.	Intestinal nematode infections		1.4932	1.4932	1.4932		0.725421	0.767778		0.871215	0.252811	0.146046	0.052832	0.170295
2002		B.	Respiratory infections			161.122	161.122	161.122		82.6381	78.4843		42.023	2.9749	23.424	13.8823	78.8183
2002		C.	Maternal conditions			16.1405	16.1405	16.1405		0	16.1405		0.00150475	0.0661598	16.0668	0	0.00612261
2002		D.	Perinatal conditions			157.717	157.717	157.717		89.3478	68.369		157.704	0.00634772	0.00535402	0	0.00132167
2002		E.	Nutritional deficiencies			53.1798	53.1798	53.1798		26.6744	26.5054		14.637	1.78243	9.27512	3.97167	23.5136
			1.	Protein-energy malnutrition		37.4276	37.4276	37.4276		18.803	18.6246		12.7023	1.02881	4.31794	2.54533	16.8332
			2.	Iodine deficiency		0.030246	0.030246	0.030246		0.0157666	0.0144795		0.00774841	0.000999321	0.00684763	0.00301076	0.0116399
			3.	Vitamin A deficiency		0.0265815	0.0265815	0.0265815		0.0109004	0.0156811		0.0125872	0	0.00686864	0.00109087	0.00603481
			4.	Iron-deficiency anaemia		12.6391	12.6391	12.6391		6.18639	6.45266		1.53834	0.702026	4.264	1.07296	5.06171
2002	II.	Noncommunicable diseases				2225.88	2225.88	2225.88		1154.15	1071.73		68.4852	17.9079	562.329	422.387	1154.77
2002		A.	Malignant neoplasms			492.161	492.161	492.161		250.316	241.845		3.20409	5.37434	154.496	112.235	216.851
2002			1.	Mouth and oropharynx cancers		14.1403	14.1403	14.1403		10.309	3.83126		0.0180894	0.0275129	5.37537	3.71038	5.00891
2002			2.	Oesophagus cancer		16.5253	16.5253	16.5253		12.1289	4.39641		0	0.00185001	4.96761	4.55485	7.00098
2002			3.	Stomach cancer		57.7983	57.7983	57.7983		34.1908	23.6075		0.0187084	0.0523752	15.6601	13.5527	28.5145
2002			4.	Colon and rectum cancers		37.3021	37.3021	37.3021		17.7533	19.5489		0.0102074	0.0168593	9.56735	8.09128	19.6164
2002			5.	Liver cancer		21.0405	21.0405	21.0405		10.7295	10.311		0.113182	0.0740868	5.73579	5.32954	9.78786
2002			6.	Pancreas cancer		20.2982	20.2982	20.2982		9.86256	10.4356		0.00303535	0.010232	4.65026	5.26335	10.3713
2002			7.	Trachea, bronchus, lung cancers		55.676	55.676	55.676		38.3542	17.3218		0.024578	0.0427012	14.9927	16.3072	24.3088
2002			8.	Melanoma and other skin cancers		7.55093	7.55093	7.55093		4.13688	3.41405		0.00299815	0.0214009	2.37386	1.38213	3.77054
2002			9.	Breast cancer		37.6526	37.6526	37.6526		0.323278	37.3293		0.00458263	0.00184018	18.0853	7.70007	11.8608
2002			10.	Cervix uteri cancer		26.3908	26.3908	26.3908		0	26.3908		0	0	14.1101	5.27347	7.00723
2002			11.	Corpus uteri cancer		11.865	11.865	11.865		0	11.865		0.000348953	0	4.33062	2.7347	4.79932
2002			12.	Ovary cancer		9.02171	9.02171	9.02171		0	9.02171		0.00363252	0.0373461	3.82343	2.16694	2.99036
2002			13.	Prostate cancer		37.6453	37.6453	37.6453		37.6453	0		0.0032272	0.00128172	1.90799	6.80266	28.9301
2002			14.	Bladder cancer		8.91839	8.91839	8.91839		6.17015	2.74825		0.00519467	0.00368478	1.29344	1.81327	5.80281
2002			15.	Lymphomas, multiple myeloma		24.002	24.002	24.002		13.3384	10.6636		0.249728	0.774573	9.05501	5.17151	8.7512
2002			16.	Leukaemia		22.0147	22.0147	22.0147		11.9953	10.0195		1.39877	2.5436	9.65035	2.78663	5.63539
2002		B.	Other neoplasms			12.6772	12.6772	12.6772		6.43245	6.24475		0.466058	0.400405	4.32005	2.32497	5.16572
2002		C.	Diabetes mellitus			168.241	168.241	168.241		72.698	95.5427		0.151447	0.202423	40.2231	43.7709	83.8929
2002		D.	Endocrine disorders			29.4815	29.4815	29.4815		13.9719	15.5096		3.37392	1.00465	9.26307	3.65992	12.1799
2002		E.	Neuropsychiatric conditions			69.0747	69.0747	69.0747		43.2243	25.8504		3.4104	2.55057	30.5666	7.72874	24.8183
2002			1.	Unipolar depressive disorders		0.218519	0.218519	0.218519		0.0907178	0.127801		0.000113855	9.38757e-05	0.0530187	0.058746	0.106547
2002			2.	Bipolar disorder		0.0412224	0.0412224	0.0412224		0.0157136	0.0255089		2.54534e-05	0.000955056	0.0138561	0.0105947	0.0157911
2002			3.	Schizophrenia		0.429853	0.429853	0.429853		0.233117	0.196736		0.00020595	0.00148603	0.256296	0.0738446	0.0980198
2002			4.	Epilepsy		7.47335	7.47335	7.47335		4.59603	2.87732		0.515872	0.529828	5.21483	0.509426	0.703391
2002			5.	Alcohol use disorders		16.556	16.556	16.556		15.167	1.389		0.0231399	0.0200238	12.1035	2.47931	1.92998
2002			6.	Alzheimer and other dementias		13.6013	13.6013	13.6013		5.35077	8.25053		0.078703	0.0373606	0.54888	1.07308	11.8633
2002			7.	Parkinson disease		4.74433	4.74433	4.74433		2.66777	2.07656		0.00527541	0.00176137	0.240988	0.550466	3.94583
2002			8.	Multiple sclerosis		0.922398	0.922398	0.922398		0.390231	0.532167		0	0.00143637	0.492646	0.156786	0.27153
2002			9.	Drug use disorders		2.38346	2.38346	2.38346		1.95722	0.426235		0	0	2.29438	0.0516872	0.0373879
2002			10.	Post-traumatic stress disorder		0.00453655	0.00453655	0.00453655		0.00449793	3.86154e-05		5.0869e-06	4.37971e-06	0.0014437	0.00143589	0.00164749
2002			11.	Obsessive-compulsive disorder		0	0	0		0	0		0	0	0	0	0
2002			12.	Panic disorder		0	0	0		0	0		0	0	0	0	0
2002			13.	Insomnia (primary)		0	0	0		0	0		0	0	0	0	0
2002			14.	Migraine		0	0	0		0	0		0	0	0	0	0
2002		F.	Sense organ diseases			0.169238	0.169238	0.169238		0.0819689	0.087269		0.0193692	0.0204873	0.0612786	0.0169463	0.0511566
2002			1.	Glaucoma		0.00738828	0.00738828	0.00738828		0.00418511	0.00320317		0	0	0.00100644	0.00131699	0.00506485
2002			2.	Cataracts		0	0	0		0	0		0	0	0	0	0
2002			3.	Vision disorders, age-related		0	0	0		0	0		0	0	0	0	0
2002			4.	Hearing loss, adult onset		0	0	0		0	0		0	0	0	0	0
2002		G.	Cardiovascular diseases			928.332	928.332	928.332		468.881	459.451		3.72917	2.22212	188.429	169.822	564.13
2002			1.	Rheumatic heart disease		6.38912	6.38912	6.38912		2.35561	4.03351		0.0250692	0.142303	3.39607	1.10473	1.72096
2002			2.	Hypertensive heart disease		89.565	89.565	89.565		40.4471	49.1179		0.0646958	0.0848887	17.1605	16.8192	55.4357
2002			3.	Ischaemic heart disease		363.411	363.411	363.411		203.931	159.48		0.0756978	0.088533	73.2504	77.8178	212.178
2002			4.	Cerebrovascular disease		272.963	272.963	272.963		131.252	141.71		0.616756	0.635668	57.0395	49.745	164.926
2002			5.	Inflammatory heart diseases		31.8999	31.8999	31.8999		17.8979	14.002		0.714911	0.298143	10.1796	6.14708	14.5602
2002		H.	Respiratory diseases			201.565	201.565	201.565		110.015	91.55		9.0317	1.46639	32.3793	32.4849	126.203
2002			1.	Chronic obstructive pulmonary disease		102.396	102.396	102.396		59.4023	42.994		1.62428	0.216967	10.2036	18.3007	72.0507
2002			2.	Asthma		11.6809	11.6809	11.6809		5.21079	6.47014		0.95596	0.193832	3.07336	1.99543	5.46236
2002		I.	Digestive diseases			187.528	187.528	187.528		118.476	69.0515		3.38501	1.5106	75.2378	35.9088	71.4857
2002			1.	Peptic ulcer disease		14.2017	14.2017	14.2017		8.30459	5.8971		0.025181	0.0467953	3.5178	2.55427	8.05764
2002			2.	Cirrhosis of the liver		74.9567	74.9567	74.9567		57.0374	17.9194		0.159135	0.121878	41.4726	16.3489	16.8542
2002		J.	Genitourinary diseases			70.8193	70.8193	70.8193		38.5889	32.2304		1.49441	0.938196	17.6876	11.6284	39.0707
2002			1.	Nephritis and nephrosis		55.6019	55.6019	55.6019		30.1065	25.4953		1.09515	0.878448	15.2943	9.70911	28.6248
2002			2.	Benign prostatic hypertrophy		2.28028	2.28028	2.28028		2.28028	0		0	0	0.0609972	0.291451	1.92783
2002		K.	Skin diseases			7.77464	7.77464	7.77464		3.21233	4.56231		0.235789	0.0952017	1.55893	0.870197	5.01452
2002		L.	Musculoskeletal diseases			12.0534	12.0534	12.0534		3.83519	8.21824		0.120645	0.322611	4.66259	1.58126	5.36632
2002			1.	Rheumatoid arthritis		2.65695	2.65695	2.65695		0.69987	1.95708		0	0.0132316	0.616037	0.486585	1.5411
2002			2.	Osteoarthritis		0.743436	0.743436	0.743436		0.279079	0.464357		0.00153806	2.38479e-05	0.0504027	0.0739129	0.617558
2002		M.	Congenital anomalies			45.7695	45.7695	45.7695		24.2783	21.4912		39.8436	1.79796	3.31398	0.330502	0.483441
2002		N.	Oral conditions			0.232518	0.232518	0.232518		0.138986	0.0935317		0.0196262	0.00193348	0.129886	0.0241353	0.0569366
2002	III.	Injuries				373.95	373.95	373.95		304.541	69.4099		18.4625	17.3941	280.859	22.8574	34.3777
2002		A.	Unintentional injuries			205.55	205.55	205.55		155.085	50.4658		17.4406	14.5662	128.744	15.94	28.8592
2002			1.	Road traffic accidents		87.7538	87.7538	87.7538		69.0445	18.7092		2.73343	5.69082	66.1866	6.38458	6.75832
2002			2.	Poisonings		2.72631	2.72631	2.72631		1.8813	0.845018		0.347115	0.169741	1.69165	0.245193	0.272619
2002			3.	Falls		15.0506	15.0506	15.0506		10.0865	4.96413		0.562036	0.507731	5.95711	1.66659	6.35718
2002			4.	Fires		4.44426	4.44426	4.44426		2.82095	1.62331		0.913295	0.425083	1.93814	0.350626	0.817115
2002			5.	Drownings		18.5716	18.5716	18.5716		15.2404	3.33123		2.55204	2.86018	11.6861	0.77058	0.702715
2002			6.	Other unintentional injuries		77.0038	77.0038	77.0038		56.0109	20.9929		10.3327	4.91265	41.2847	6.52243	13.9513
2002		B.	Intentional injuries			168.4	168.4	168.4		149.456	18.9441		1.0219	2.82786	152.114	6.91743	5.51853
2002			1.	Self-inflicted injuries		29.8116	29.8116	29.8116		23.4604	6.35118		0.00446805	0.665804	24.1578	2.44351	2.53999
2002			2.	Violence		129.507	129.507	129.507		117.757	11.7496		0.996249	2.0449	119.831	3.96444	2.66998
2002			3.	War		8.27993	8.27993	8.27993		7.46418	0.815751		0.0175141	0.107949	7.36785	0.501091	0.285523
2015	Population (millions)					612.569	613.972	610.939		297.508	315.062		54.4634	109.56	384.433	36.5944	27.5186
2015		All Causes				4088.62	3895.24	4306.84		2237.06	1851.56		226.846	37.2292	1295.37	658.499	1870.68
2015	I.	Communicable, maternal, perinatal and nutritional conditions				605.948	518.545	676.443		347.253	258.696		160.954	8.71528	248.385	37.7608	150.134
2015		A.	Infectious and parasitic diseases			332.302	283.762	369.773		206.276	126.025		39.6783	6.23421	214.934	22.6343	48.8212
2015			1.	Tuberculosis		26.0924	22.9017	34.8107		16.6137	9.47865		0.387444	0.30149	14.4337	4.63496	6.33475
2015			2.	STDs excluding HIV		0.953651	0.767998	1.14923		0.449315	0.504336		0.38935	0.00274401	0.315504	0.0571285	0.188924
2015			3.	HIV/AIDS		182.289	159.16	190.622		122.982	59.3068		2.30217	2.65116	170.803	5.69535	0.837436
2015			4.	Diarrhoeal diseases		26.846	20.5932	32.4591		14.177	12.669		18.9761	0.134525	1.48293	1.02185	5.23058
2015			5.	Childhood-cluster diseases		2.36508	1.80374	2.9405		1.28035	1.08474		2.18277	0.0353751	0.0693395	0.0266752	0.0509221
2015				a.	Pertussis	1.91453	1.44828	2.38404		0.994432	0.920098		1.91341	0.000517694	0.000603853	0	0
2015				d.	Measles	4.3113e-05	3.40036e-05	5.69582e-05		2.0987e-05	2.2126e-05		3.58878e-05	7.22524e-06	0	0	0
2015				e.	Tetanus	0.295916	0.234999	0.359766		0.171263	0.124653		0.160838	0.00699787	0.0572137	0.0229925	0.0478741
2015			6.	Meningitis		9.55605	7.57988	11.6687		5.54894	4.00712		4.37167	0.738925	2.67833	0.602959	1.16417
2015			7.	Hepatitis B and C		4.81659	4.00402	5.6543		2.69365	2.12294		0.266868	0.105052	2.41827	0.868555	1.15785
2015			8.	Malaria		0.667833	0.50414	0.826686		0.395222	0.272611		0.520902	0.0088954	0.082599	0.0177201	0.0377156
2015			9.	Tropical-cluster diseases		12.3919	10.4598	13.9366		6.75169	5.64023		0.0369941	0.0124185	5.36479	2.69992	4.27781
2015			10.	Leprosy		0.43037	0.376896	0.475341		0.274668	0.155702		0	0.000498623	0.130396	0.0702896	0.229186
2015			11.	Dengue		1.11596	0.863877	1.4044		0.601886	0.514071		0.193076	0.600916	0.175575	0.0445635	0.101827
2015			12.	Japanese encephalitis		0	0	0		0	0		0	0	0	0	0
2015			13.	Trachoma		0.00421088	0.0031885	0.0052316		0.00421088	0		0.0026717	0.00153918	0	0	0
2015			14.	Intestinal nematode infections		0.843718	0.646592	0.930989		0.428194	0.415524		0.405282	0.128574	0.105834	0.0412784	0.162749
2015		B.	Respiratory infections			129.279	111.52	143.432		66.4979	62.7812		17.8637	1.49732	18.4113	12.2468	79.26
2015		C.	Maternal conditions			8.42298	6.31682	10.6267		0	8.42298		0.000662765	0.0272031	8.38858	0	0.00653234
2015		D.	Perinatal conditions			97.5706	85.1223	108.591		55.407	42.1636		97.5636	0.00259353	0.00336312	0	0.0010228
2015		E.	Nutritional deficiencies			38.3739	31.8246	44.0201		19.0715	19.3024		5.84761	0.953959	6.64766	2.87977	22.0449
2015			1.	Protein-energy malnutrition		26.5655	21.8985	30.3762		13.1324	13.4331		5.00598	0.560772	3.07875	1.84752	16.0725
2015			2.	Iodine deficiency		0.0228008	0.0185755	0.0260326		0.0117188	0.011082		0.00338119	0.000503729	0.00486276	0.00255417	0.011499
2015			3.	Vitamin A deficiency		0.0163854	0.0129874	0.0186454		0.00670838	0.00967701		0.00578967	0	0.00492463	0.000688606	0.00498248
2015			4.	Iron-deficiency anaemia		9.32573	7.84428	10.8028		4.64329	4.68245		0.687993	0.367588	3.07905	0.766085	4.42502
2015	II.	Noncommunicable diseases				3024.8	2935.31	3157.43		1519.21	1505.59		50.8208	13.5043	702.768	588.32	1669.39
2015		A.	Malignant neoplasms			645.609	639.705	669.915		327.722	317.887		2.69586	4.69202	189.764	153.341	295.116
2015			1.	Mouth and oropharynx cancers		18.1745	17.9989	18.7538		13.0709	5.10362		0.0155982	0.0236672	6.46995	4.92005	6.74528
2015			2.	Oesophagus cancer		21.4173	21.266	21.8526		15.5748	5.84255		0	0.00172453	6.04501	5.95315	9.41743
2015			3.	Stomach cancer		77.6458	77.3402	79.37		45.9886	31.6572		0.0171388	0.048705	19.8216	18.6888	39.0696
2015			4.	Colon and rectum cancers		47.4751	47.1538	48.0744		22.5422	24.9329		0.00914508	0.014062	11.5779	10.3311	25.5429
2015			5.	Liver cancer		27.9246	27.8346	28.4498		14.1403	13.7844		0.0937681	0.0656093	7.20343	7.20682	13.355
2015			6.	Pancreas cancer		26.2981	26.1627	26.6664		12.8337	13.4644		0.00224572	0.00911789	5.71136	6.86489	13.7105
2015			7.	Trachea, bronchus, lung cancers		80.4123	77.9671	95.1106		52.5091	27.9032		0	0	21.2752	24.411	34.7261
2015			8.	Melanoma and other skin cancers		9.85266	9.80065	10.0325		5.4359	4.41676		0.00288819	0.0181068	2.76026	1.79038	5.28103
2015			9.	Breast cancer		48.0786	47.6534	48.5725		0.415985	47.6626		0.00401368	0.0015706	22.225	10.4282	15.4198
2015			10.	Cervix uteri cancer		33.9949	33.4647	34.6675		0	33.9949		0	0	17.0628	7.49524	9.43692
2015			11.	Corpus uteri cancer		15.3998	15.355	15.5011		0	15.3998		0.000366431	0	5.23971	3.797	6.36268
2015			12.	Ovary cancer		11.0951	10.9489	11.2775		0	11.0951		0.00294831	0.0323935	4.4913	2.83438	3.73408
2015			13.	Prostate cancer		51.6292	51.8291	52.082		51.6292	0		0.00320164	0.00137911	2.45179	8.92828	40.2445
2015			14.	Bladder cancer		11.9626	11.9504	12.0384		8.19127	3.77132		0.00425646	0.00317654	1.60084	2.36481	7.98951
2015			15.	Lymphomas, multiple myeloma		29.8865	29.5955	30.6254		16.5794	13.3071		0.206613	0.671753	10.8267	6.9312	11.2502
2015			16.	Leukaemia		25.51	25.2496	25.9912		13.8688	11.6412		1.18562	2.23381	10.7892	3.79361	7.5077
2015		B.	Other neoplasms			16.0145	15.8986	16.2735		8.08807	7.9264		0.386031	0.339048	5.04433	3.09529	7.14977
2015		C.	Diabetes mellitus			374.005	353.2	388.183		142.08	231.924		0.120643	0.156054	102.369	90.9961	180.363
2015		D.	Endocrine disorders			35.4802	34.2511	36.6512		16.7159	18.7643		2.18581	0.72597	10.2484	4.8209	17.4991
2015		E.	Neuropsychiatric conditions			84.2255	81.609	86.6802		52.6068	31.6187		2.35191	1.9271	35.1485	10.057	34.741
2015			1.	Unipolar depressive disorders		0.28468	0.278589	0.291125		0.121785	0.162895		7.28845e-05	6.58947e-05	0.0577866	0.0750384	0.151716
2015			2.	Bipolar disorder		0.0531971	0.0517044	0.0543474		0.0212669	0.0319303		1.62974e-05	0.000861507	0.0157746	0.0141146	0.0224302
2015			3.	Schizophrenia		0.531212	0.513995	0.548489		0.286236	0.244977		0.000131628	0.00104221	0.297379	0.0985793	0.13408
2015			4.	Epilepsy		8.11315	7.68887	8.47862		5.05102	3.06213		0.355034	0.412112	5.68143	0.683498	0.981074
2015			5.	Alcohol use disorders		20.4877	19.7779	21.0954		18.8071	1.68066		0.0188772	0.0154941	14.6126	3.2426	2.59811
2015			6.	Alzheimer and other dementias		18.911	18.6956	19.2496		7.537	11.374		0.0548917	0.0280787	0.649814	1.35202	16.8262
2015			7.	Parkinson disease		6.61759	6.54903	6.68708		3.72712	2.89047		0.00359014	0.00123656	0.304808	0.725515	5.58244
2015			8.	Multiple sclerosis		1.15085	1.11557	1.18857		0.495218	0.655631		0	0.00100725	0.572732	0.19917	0.37794
2015			9.	Drug use disorders		2.70823	2.58111	2.84579		2.23179	0.47644		0	0	2.58559	0.0715541	0.051083
2015			10.	Post-traumatic stress disorder		0.00553908	0.00543824	0.00563795		0.00549896	4.01207e-05		3.25387e-06	3.07444e-06	0.00149449	0.00191245	0.00212582
2015			11.	Obsessive-compulsive disorder		0	0	0		0	0		0	0	0	0	0
2015			12.	Panic disorder		0	0	0		0	0		0	0	0	0	0
2015			13.	Insomnia (primary)		0	0	0		0	0		0	0	0	0	0
2015			14.	Migraine		0	0	0		0	0		0	0	0	0	0
2015		F.	Sense organ diseases			0.189851	0.18134	0.196165		0.0931984	0.0966525		0.0129242	0.0151561	0.0665655	0.021512	0.073693
2015			1.	Glaucoma		0.00999932	0.00977715	0.0101546		0.00506454	0.00493478		0	0	0.000926765	0.00171935	0.00735321
2015			2.	Cataracts		0	0	0		0	0		0	0	0	0	0
2015			3.	Vision disorders, age-related		0	0	0		0	0		0	0	0	0	0
2015			4.	Hearing loss, adult onset		0	0	0		0	0		0	0	0	0	0
2015		G.	Cardiovascular diseases			1212.7	1196.41	1246.02		600.361	612.337		3.34839	1.44805	205.131	217.592	785.178
2015			1.	Rheumatic heart disease		7.11486	6.7145	7.66149		2.63677	4.47809		0.0221415	0.0801754	3.27734	1.36633	2.36887
2015			2.	Hypertensive heart disease		116.308	113.018	121.213		51.9765	64.3313		0.0591162	0.0597607	18.0434	19.9493	78.1962
2015			3.	Ischaemic heart disease		506.023	500.886	517.444		275.458	230.565		0.0722228	0.0613937	86.9197	109.605	309.365
2015			4.	Cerebrovascular disease		329.742	326.603	336.543		155.995	173.747		0.562233	0.436175	57.4705	57.6322	213.641
2015			5.	Inflammatory heart diseases		38.7365	37.546	40.9643		21.0538	17.6827		0.613932	0.177942	10.5416	7.32572	20.0773
2015		H.	Respiratory diseases			277.519	261.881	310.688		150.588	126.93		7.1635	1.16073	39.4705	44.8809	184.843
2015			1.	Chronic obstructive pulmonary disease		149.234	140.464	173.548		86.0743	63.1593		1.38345	0.187459	13.8751	26.2985	107.489
2015			2.	Asthma		15.2318	14.2876	16.3173		6.74875	8.48308		0.752592	0.149263	3.67032	2.7504	7.90925
2015		I.	Digestive diseases			226.66	205.533	245.072		142.021	84.6389		1.90716	0.866048	85.8795	44.5328	93.4747
2015			1.	Peptic ulcer disease		18.2277	16.9436	19.2184		10.5719	7.65581		0.016343	0.0292338	4.01766	3.24463	10.9198
2015			2.	Cirrhosis of the liver		89.4369	78.9569	99.0527		68.18	21.2569		0.112537	0.071496	48.2312	19.8192	21.2024
2015		J.	Genitourinary diseases			91.4574	88.9732	93.7937		50.9128	40.5446		0.910383	0.562105	19.3072	15.2649	55.4128
2015			1.	Nephritis and nephrosis		71.1558	69.0631	73.1163		39.3029	31.8528		0.664816	0.5269	16.7595	12.7451	40.4595
2015			2.	Benign prostatic hypertrophy		3.29665	3.28794	3.28356		3.29665	0		0	0	0.0770002	0.391265	2.82839
2015		K.	Skin diseases			10.2014	10.0077	10.4114		4.19402	6.00739		0.162911	0.0659992	1.78394	1.13049	7.05807
2015		L.	Musculoskeletal diseases			15.2221	14.7374	15.6583		4.96581	10.2563		0.081102	0.255008	5.05261	2.12039	7.71295
2015			1.	Rheumatoid arthritis		3.65439	3.56353	3.73836		0.982078	2.67231		0	0.0104603	0.75512	0.650404	2.23841
2015			2.	Osteoarthritis		1.06999	1.05283	1.08634		0.405382	0.664606		0.000929343	1.48312e-05	0.0624465	0.0979045	0.908693
2015		M.	Congenital anomalies			35.2478	32.6568	37.5984		18.6938	16.554		29.4811	1.28962	3.35346	0.435163	0.688407
2015		N.	Oral conditions			0.275116	0.263881	0.284373		0.167251	0.107864		0.0130385	0.00141357	0.149063	0.0323212	0.0792797
2015	III.	Injuries				457.871	441.384	472.973		370.6	87.2707		15.0709	15.0095	344.215	32.418	51.1567
2015		A.	Unintentional injuries			239.587	230.211	249.929		176.265	63.3227		13.9978	11.8093	148.301	22.1489	43.3303
2015			1.	Road traffic accidents		108.49	105.999	111.202		83.6905	24.799		2.52722	5.26445	82.0055	9.0678	9.62451
2015			2.	Poisonings		2.9376	2.72798	3.17909		2.01807	0.919539		0.261004	0.132187	1.81827	0.328423	0.397717
2015			3.	Falls		20.0698	19.681	20.4135		12.6534	7.41645		0.465601	0.401453	6.89643	2.41738	9.88894
2015			4.	Fires		4.91683	4.72608	5.16745		3.05252	1.8643		0.758668	0.359322	2.10852	0.476357	1.21396
2015			5.	Drownings		17.2308	15.7622	18.8812		14.1974	3.03343		1.97697	1.96631	11.2656	1.01308	1.00882
2015			6.	Other unintentional injuries		85.9428	81.3148	91.0858		60.6528	25.29		8.00836	3.68562	44.2066	8.84586	21.1964
2015		B.	Intentional injuries			218.283	211.172	223.044		194.335	23.948		1.07311	3.2002	195.914	10.2691	7.82638
2015			1.	Self-inflicted injuries		39.5038	39.0563	39.9252		31.6988	7.80504		0.00485885	0.706811	31.807	3.48632	3.49887
2015			2.	Violence		168.028	162.756	172.397		153.053	14.9754		1.0469	2.37215	154.869	5.87951	3.8605
2015			3.	War		9.76261	8.42996	9.70469		8.63022	1.13239		0.0175834	0.109996	8.31156	0.891597	0.43187
2030	Population (millions)					677.61	685.653	669.612		320.45	357.16		50.6418	104.12	421.222	55.6104	46.0164
2030		All Causes				5083.27	4650.88	5502.58		2637.05	2446.22		120.256	27.3687	1369.27	830.372	2736
2030	I.	Communicable, maternal, perinatal and nutritional conditions				541.03	357.464	621.767		299.058	241.972		75.1636	6.18789	267.199	37.1621	155.318
2030		A.	Infectious and parasitic diseases			342.19	206.803	379.521		200.83	141.359		16.2655	5.08268	246.847	24.7092	49.2853
2030			1.	Tuberculosis		11.7463	7.53942	22.0625		7.22768	4.51865		0.119005	0.0974097	5.71517	2.31805	3.49671
2030			2.	STDs excluding HIV		0.57342	0.386799	0.802322		0.231202	0.342218		0.163518	0.000948663	0.15838	0.0428817	0.207691
2030			3.	HIV/AIDS		245.137	137.538	247.06		150.375	94.7615		2.48886	3.63264	223.734	13.2736	2.00822
2030			4.	Diarrhoeal diseases		14.3802	9.28384	20.3782		7.42154	6.95865		6.60789	0.0530656	0.932041	0.829418	5.95777
2030			5.	Childhood-cluster diseases		1.08664	0.585798	1.77535		0.624416	0.462224		0.953318	0.0139177	0.0404486	0.0211909	0.0577656
2030				a.	Pertussis	0.836422	0.42899	1.39918		0.462353	0.374069		0.835963	0.00019568	0.000262705	0	0
2030				d.	Measles	1.21794e-05	6.72456e-06	2.21662e-05		5.78088e-06	6.39852e-06		9.42977e-06	2.74963e-06	0	0	0
2030				e.	Tetanus	0.174377	0.114602	0.251001		0.104466	0.0699107		0.0643032	0.00284317	0.0344948	0.018273	0.054463
2030			6.	Meningitis		5.25876	3.33593	7.81236		3.05267	2.20609		1.76585	0.305145	1.56383	0.44048	1.18346
2030			7.	Hepatitis B and C		3.43971	2.46535	4.56633		1.77069	1.66902		0.116302	0.045283	1.32693	0.668001	1.28319
2030			8.	Malaria		0.286489	0.160469	0.448846		0.171703	0.114785		0.179593	0.00339035	0.0481856	0.0142823	0.0410376
2030			9.	Tropical-cluster diseases		9.72067	7.17771	12.0134		5.1035	4.61717		0.00767135	0.0040416	3.17768	1.95391	4.57737
2030			10.	Leprosy		0.355584	0.284417	0.408922		0.21874	0.136843		0	0.000157154	0.061603	0.0501265	0.243697
2030			11.	Dengue		0.581966	0.345682	0.923127		0.333219	0.248747		0.0812139	0.246014	0.116092	0.0357279	0.102918
2030			12.	Japanese encephalitis		0	0	0		0	0		0	0	0	0	0
2030			13.	Trachoma		0.00124546	0.000666016	0.00204708		0.00124546	0		0.000688416	0.00055704	0	0	0
2030			14.	Intestinal nematode infections		0.417944	0.283738	0.533668		0.225333	0.19261		0.116363	0.0468994	0.0656177	0.0316713	0.157392
2030		B.	Respiratory infections			113.91	89.7033	132.697		55.2105	58.6991		6.36769	0.650816	12.4508	10.4666	83.9737
2030		C.	Maternal conditions			3.66115	1.95794	6.14004		0	3.66115		0.000217086	0.00963163	3.64356	0	0.00774938
2030		D.	Perinatal conditions			50.5604	36.4811	65.189		28.9364	21.624		50.5567	0.0010766	0.00156785	0	0.00108526
2030		E.	Nutritional deficiencies			30.7093	22.519	38.2201		14.081	16.6283		1.97347	0.443688	4.25591	1.98625	22.05
2030			1.	Protein-energy malnutrition		21.3002	15.6656	26.1865		9.59712	11.703		1.6544	0.257227	1.88184	1.26348	16.2432
2030			2.	Iodine deficiency		0.0180004	0.0131308	0.0225105		0.00860708	0.00939331		0.000914256	0.000215545	0.00281721	0.00203	0.0120234
2030			3.	Vitamin A deficiency		0.00935397	0.00644182	0.0123547		0.00412682	0.00522714		0.00156151	0	0.00303001	0.000391939	0.00437051
2030			4.	Iron-deficiency anaemia		7.30794	5.29522	9.43644		3.48086	3.82708		0.267622	0.175702	2.08893	0.528192	4.24749
2030	II.	Noncommunicable diseases				4016.47	3809.7	4316.38		1922.79	2093.68		34.508	9.37406	726.487	748.483	2497.62
2030		A.	Malignant neoplasms			877.812	878.327	924.15		445.033	432.78		1.98815	3.71898	210.378	212.523	449.204
2030			1.	Mouth and oropharynx cancers		23.8859	23.9249	24.4651		16.7108	7.1751		0.0114952	0.0185257	6.99861	6.56476	10.2925
2030			2.	Oesophagus cancer		28.289	28.5962	28.3632		20.1903	8.09873		0	0.00139091	6.62989	7.78361	13.8741
2030			3.	Stomach cancer		108.819	110.51	108.971		63.5177	45.3016		0.0133097	0.0412288	22.1948	25.7094	60.8606
2030			4.	Colon and rectum cancers		61.9591	62.6387	61.5648		29.0114	32.9477		0.00750746	0.0102236	12.4809	13.2251	36.2354
2030			5.	Liver cancer		38.5389	39.0945	38.6174		19.2117	19.3271		0.0669807	0.0525674	8.18412	9.84268	20.3925
2030			6.	Pancreas cancer		35.379	35.8345	35.2077		17.1285	18.2505		0.00141222	0.00721464	6.19861	8.97248	20.1993
2030			7.	Trachea, bronchus, lung cancers		126.848	121.38	172.567		79.4387	47.4097		0	0	29.579	39.247	58.0224
2030			8.	Melanoma and other skin cancers		13.1554	13.3332	13.1279		7.16583	5.98961		0.00244556	0.0137499	2.84475	2.31482	7.97967
2030			9.	Breast cancer		60.2153	59.618	60.647		0.531195	59.6841		0.00299453	0.00120939	23.5764	13.7184	22.9163
2030			10.	Cervix uteri cancer		43.8671	42.677	44.9289		0	43.8671		0	0	18.2474	10.6058	15.0138
2030			11.	Corpus uteri cancer		20.4586	20.5449	20.3999		0	20.4586		0.000322318	0	5.53885	5.13416	9.78522
2030			12.	Ovary cancer		13.6393	13.3518	13.8891		0	13.6393		0.00203538	0.0251115	4.54598	3.58676	5.47944
2030			13.	Prostate cancer		73.129	76.1668	70.6504		73.129	0		0.00273193	0.00122817	2.85844	11.9984	58.2682
2030			14.	Bladder cancer		16.699	17.1337	16.2427		11.1417	5.55725		0.00307464	0.00266865	1.78495	3.14289	11.7654
2030			15.	Lymphomas, multiple myeloma		37.9765	37.9865	38.6016		20.9219	17.0546		0.146039	0.529091	11.6088	9.34878	16.3438
2030			16.	Leukaemia		29.6743	29.4651	30.1083		16.0139	13.6604		0.873536	1.76963	10.877	5.16267	10.9915
2030		B.	Other neoplasms			20.5545	20.7057	20.6039		10.2757	10.2788		0.2745	0.256655	5.27596	4.13151	10.6159
2030		C.	Diabetes mellitus			527.633	472.63	562.425		193.851	333.782		0.0870884	0.110266	114.57	123.75	289.116
2030		D.	Endocrine disorders			44.2349	42.1441	45.8975		19.8636	24.3713		1.24675	0.474776	10.0754	6.11678	26.3212
2030		E.	Neuropsychiatric conditions			102.192	97.2617	106.105		61.6237	40.5679		1.46531	1.32591	35.9624	12.8896	50.5484
2030			1.	Unipolar depressive disorders		0.377127	0.364653	0.384718		0.157895	0.219233		4.18722e-05	3.88421e-05	0.0560829	0.092208	0.228756
2030			2.	Bipolar disorder		0.0662808	0.0630631	0.0684879		0.0264535	0.0398273		9.36603e-06	0.00063309	0.0142014	0.0183309	0.033106
2030			3.	Schizophrenia		0.627612	0.588684	0.663206		0.330857	0.296755		7.54237e-05	0.000638522	0.291986	0.130701	0.204211
2030			4.	Epilepsy		8.34717	7.55935	9.06295		5.19518	3.15199		0.219369	0.291186	5.4412	0.894154	1.50126
2030			5.	Alcohol use disorders		23.6879	22.1216	25.0087		21.772	1.91585		0.0135614	0.0112241	15.6514	4.20617	3.80554
2030			6.	Alzheimer and other dementias		26.4648	26.1359	26.6057		10.006	16.4587		0.034041	0.0193241	0.671336	1.67307	24.067
2030			7.	Parkinson disease		9.58033	9.51865	9.48598		5.19959	4.38074		0.00226894	0.000728904	0.381541	0.927034	8.26876
2030			8.	Multiple sclerosis		1.39277	1.31365	1.46147		0.599797	0.792975		0	0.000620494	0.568282	0.243248	0.58062
2030			9.	Drug use disorders		2.70427	2.43401	2.99562		2.22852	0.47575		0	0	2.53067	0.0940509	0.0795547
2030			10.	Post-traumatic stress disorder		0.00682489	0.00673807	0.00676966		0.00677889	4.60015e-05		1.867e-06	1.81158e-06	0.00120188	0.00238598	0.00323335
2030			11.	Obsessive-compulsive disorder		0	0	0		0	0		0	0	0	0	0
2030			12.	Panic disorder		0	0	0		0	0		0	0	0	0	0
2030			13.	Insomnia (primary)		0	0	0		0	0		0	0	0	0	0
2030			14.	Migraine		0	0	0		0	0		0	0	0	0	0
2030		F.	Sense organ diseases			0.226503	0.212734	0.236783		0.107407	0.119096		0.0076387	0.00981702	0.067369	0.0293284	0.11235
2030			1.	Glaucoma		0.0138969	0.0136173	0.0140945		0.00634014	0.00755672		0	0	0.000755844	0.00247957	0.0106614
2030			2.	Cataracts		0	0	0		0	0		0	0	0	0	0
2030			3.	Vision disorders, age-related		0	0	0		0	0		0	0	0	0	0
2030			4.	Hearing loss, adult onset		0	0	0		0	0		0	0	0	0	0
2030		G.	Cardiovascular diseases			1578.28	1527.66	1646.62		723.362	854.922		2.72605	0.848807	189.996	248.357	1136.36
2030			1.	Rheumatic heart disease		7.80648	7.02305	8.86453		2.80744	4.99903		0.01758	0.0396441	2.61518	1.56106	3.57301
2030			2.	Hypertensive heart disease		154.78	147.925	163.548		64.7383	90.0419		0.0487384	0.0375039	15.9225	21.6599	117.112
2030			3.	Ischaemic heart disease		655.944	634.266	685.133		330.579	325.364		0.0624367	0.0370231	83.7513	128.433	443.66
2030			4.	Cerebrovascular disease		432.04	421.225	446.099		191.14	240.9		0.465381	0.275347	52.5079	64.4891	314.302
2030			5.	Inflammatory heart diseases		46.9616	44.2594	50.9626		23.5414	23.4202		0.481713	0.0946347	9.12465	8.00991	29.2507
2030		H.	Respiratory diseases			404.447	363.519	502.711		211.134	193.313		5.19474	0.835455	44.4768	62.048	291.892
2030			1.	Chronic obstructive pulmonary disease		233.745	208.573	311.739		130.045	103.701		1.01163	0.136573	17.4785	37.8683	177.25
2030			2.	Asthma		20.7174	18.5376	23.4867		8.88581	11.8316		0.540229	0.104855	3.89503	3.74456	12.4327
2030		I.	Digestive diseases			279.807	234.827	319.342		165.459	114.348		0.899262	0.428001	86.9423	54.1871	137.35
2030			1.	Peptic ulcer disease		24.6222	21.8565	26.5573		13.4526	11.1696		0.0088221	0.0161341	4.08745	4.05137	16.4584
2030			2.	Cirrhosis of the liver		103.605	81.1195	126.14		77.0158	26.5895		0.0684469	0.0349328	49.2026	23.5064	30.7929
2030		J.	Genitourinary diseases			121.738	117.804	124.235		66.5746	55.163		0.496634	0.298787	18.9243	19.6755	82.3424
2030			1.	Nephritis and nephrosis		93.5968	90.132	96.0559		50.7491	42.8477		0.360517	0.280727	16.5638	16.4647	59.927
2030			2.	Benign prostatic hypertrophy		4.75806	4.84394	4.5215		4.75806	0		0	0	0.0830567	0.51627	4.15874
2030		K.	Skin diseases			14.0562	13.7365	14.2544		5.44168	8.61447		0.101129	0.0413488	1.82513	1.44501	10.6435
2030		L.	Musculoskeletal diseases			19.7212	18.7901	20.4543		6.39254	13.3287		0.0482277	0.186218	4.83217	2.73131	11.9233
2030			1.	Rheumatoid arthritis		5.15431	4.96119	5.30931		1.36074	3.79357		0	0.00786702	0.800572	0.844891	3.50098
2030			2.	Osteoarthritis		1.57104	1.54534	1.58412		0.577475	0.993566		0.000511044	1.05447e-05	0.0663374	0.129551	1.37463
2030		M.	Congenital anomalies			25.4351	21.779	29.0029		13.475	11.96		19.9648	0.838136	3.00668	0.556156	1.06933
2030		N.	Oral conditions			0.327871	0.306697	0.345629		0.197387	0.130484		0.00771513	0.000906235	0.153271	0.0431372	0.122842
2030	III.	Injuries				525.767	483.716	564.436		415.203	110.564		10.5846	11.8067	375.586	44.7265	83.0633
2030		A.	Unintentional injuries			266.097	241.614	291.07		183.69	82.4072		9.5686	8.61503	147.846	29.5848	70.4821
2030			1.	Road traffic accidents		121.425	110.045	131.548		90.0412	31.3841		2.08552	4.42958	87.9291	12.097	14.8842
2030			2.	Poisonings		2.95248	2.51331	3.48511		1.93914	1.01333		0.159857	0.0913615	1.6213	0.430397	0.649566
2030			3.	Falls		27.4571	27.0058	27.6977		15.2238	12.2333		0.326053	0.275408	6.75148	3.38608	16.718
2030			4.	Fires		5.3612	4.97455	5.82304		3.11616	2.24504		0.53609	0.277382	1.96139	0.644345	1.94199
2030			5.	Drownings		14.4529	11.7296	17.7403		11.7826	2.67029		1.28174	1.14307	9.12453	1.26155	1.64199
2030			6.	Other unintentional injuries		94.4478	85.3461	104.776		61.5866	32.8612		5.17933	2.39823	40.4584	11.7655	34.6463
2030		B.	Intentional injuries			259.67	242.102	273.366		231.513	28.1567		1.01596	3.19168	227.74	15.1416	12.5812
2030			1.	Self-inflicted injuries		47.2978	46.6153	47.9573		38.1751	9.12267		0.00481604	0.704699	36.331	5.01277	5.24454
2030			2.	Violence		200.646	186.93	213.853		183.174	17.4721		0.990221	2.36438	182.127	8.72109	6.44393
2030			3.	War		10.5743	7.49736	10.3411		9.06287	1.51142		0.0173548	0.110666	8.22245	1.39047	0.833341

## Sheet: Middle East and North Africa
Deaths by cause, scenario, sex and age for the years 2002, 2015 and 2030
Source: Mathers CD, Loncar D (2006). Projections of global mortality and burden of disease from 2002 to 2030.
Middle East and North Africa
						Total deaths ('000)				Baseline deaths ('000)			Baseline projections ('000) by age group
Year		Cause				Baseline	Optimistic	Pessimistic		Male	Female		0-4	5-14	15-59	60-69	70+
2002	Population (millions)					312.593	312.593	312.593		158.58	154.013		37.282	74.1237	182.563	11.1487	7.47568
2002		All Causes				1904.04	1904.04	1904.04		1062.44	841.603		413.618	55.4177	522.132	294.24	618.634
2002	I.	Communicable, maternal, perinatal and nutritional conditions				449.9	449.9	449.9		235.764	214.136		317.092	13.9067	56.6046	18.8279	43.4686
2002		A.	Infectious and parasitic diseases			199.879	199.879	199.879		105.693	94.1864		128.139	5.16569	31.215	12.5218	22.8375
2002			1.	Tuberculosis		22.0213	22.0213	22.0213		12.7664	9.25487		2.34346	0.632539	11.9367	3.30459	3.80395
2002			2.	STDs excluding HIV		4.15705	4.15705	4.15705		2.18807	1.96899		0.0735199	0.016012	2.21626	1.0654	0.785854
2002			3.	HIV/AIDS		1.86934	1.86934	1.86934		1.36997	0.499371		0.244648	0.0288545	1.57363	0.0222034	0
2002			4.	Diarrhoeal diseases		76.4812	76.4812	76.4812		39.9811	36.5001		68.8939	0.625907	1.98159	1.09264	3.88714
2002			5.	Childhood-cluster diseases		13.1786	13.1786	13.1786		6.58383	6.59476		12.0946	0.914721	0.127577	0.0119994	0.0296963
2002				a.	Pertussis	4.05851	4.05851	4.05851		2.02925	2.02925		4.05851	0	0	0	0
2002				d.	Measles	6.13041	6.13041	6.13041		3.0652	3.0652		5.28999	0.840417	0	0	0
2002				e.	Tetanus	2.95979	2.95979	2.95979		1.47972	1.48006		2.73257	0.0743022	0.127576	0.0119994	0.0133346
2002			6.	Meningitis		9.7293	9.7293	9.7293		4.27876	5.45054		7.60169	0.686936	0.929145	0.191337	0.320197
2002			7.	Hepatitis B and C		8.93814	8.93814	8.93814		4.76638	4.17176		1.09691	0.357058	3.31366	1.79625	2.37426
2002			8.	Malaria		7.24404	7.24404	7.24404		3.43349	3.81054		6.26794	0.135692	0.568594	0.0915501	0.180259
2002			9.	Tropical-cluster diseases		9.60832	9.60832	9.60832		5.89711	3.71121		0.175982	0.27501	3.31661	2.13871	3.70201
2002			10.	Leprosy		0.0984018	0.0984018	0.0984018		0.0418188	0.0565831		0.00125954	0	0.0158765	0.0219741	0.0592918
2002			11.	Dengue		0.287192	0.287192	0.287192		0.172272	0.11492		0.0536077	0.179977	0.0321646	0.0071477	0.0142954
2002			12.	Japanese encephalitis		0	0	0		0	0		0	0	0	0	0
2002			13.	Trachoma		0	0	0		0	0		0	0	0	0	0
2002			14.	Intestinal nematode infections		0.0922297	0.0922297	0.0922297		0.0538893	0.0383405		0.00407447	0.011117	0.0438207	0.0221899	0.0110277
2002		B.	Respiratory infections			117.769	117.769	117.769		61.3762	56.3926		77.3134	7.62578	9.46964	5.51326	17.8467
2002		C.	Maternal conditions			14.8387	14.8387	14.8387		0	14.8387		0	0.00271298	14.836	0	0
2002		D.	Perinatal conditions			101.011	101.011	101.011		61.355	39.6561		101.011	0	0	0	0
2002		E.	Nutritional deficiencies			16.4021	16.4021	16.4021		7.34018	9.06193		10.6283	1.1125	1.08399	0.792842	2.78444
			1.	Protein-energy malnutrition		8.6059	8.6059	8.6059		3.95764	4.64826		7.48495	0.303762	0.18095	0.18575	0.450483
			2.	Iodine deficiency		0.366543	0.366543	0.366543		0.184274	0.182269		0.251615	0.00594799	0.0160054	0.0237194	0.0692554
			3.	Vitamin A deficiency		0.250033	0.250033	0.250033		0.133677	0.116356		0.0180287	0.00407164	0.0694989	0.040549	0.117885
			4.	Iron-deficiency anaemia		5.55179	5.55179	5.55179		2.22778	3.32401		1.53619	0.695299	0.762081	0.5043	2.05392
2002	II.	Noncommunicable diseases				1243.41	1243.41	1243.41		675.709	567.702		73.3603	18.716	338.786	258.57	553.979
2002		A.	Malignant neoplasms			165.454	165.454	165.454		95.1634	70.2906		2.91379	3.95773	66.8368	37.7593	53.9864
2002			1.	Mouth and oropharynx cancers		4.7272	4.7272	4.7272		3.3404	1.38681		0.0315993	0.0412066	2.18419	1.14344	1.32676
2002			2.	Oesophagus cancer		5.10053	5.10053	5.10053		3.00331	2.09723		0.00856048	0.0135063	1.62903	1.39424	2.0552
2002			3.	Stomach cancer		17.5678	17.5678	17.5678		11.037	6.53074		0.0242519	0.0845095	5.68009	4.50249	7.27644
2002			4.	Colon and rectum cancers		10.1285	10.1285	10.1285		5.72579	4.40268		0.00531896	0.0536149	4.29728	2.23353	3.53873
2002			5.	Liver cancer		9.10216	9.10216	9.10216		5.68641	3.41576		0.0663998	0.0684518	3.35941	2.46852	3.13938
2002			6.	Pancreas cancer		3.87142	3.87142	3.87142		2.30339	1.56803		0.000961607	0.00452249	1.27233	1.05924	1.53437
2002			7.	Trachea, bronchus, lung cancers		19.7775	19.7775	19.7775		15.3875	4.38995		0.0261626	0.0590357	6.62587	5.77903	7.28737
2002			8.	Melanoma and other skin cancers		1.23333	1.23333	1.23333		0.667299	0.566026		0.00726699	0.00835378	0.468454	0.260654	0.488596
2002			9.	Breast cancer		13.9497	13.9497	13.9497		0.0066751	13.943		0.00110513	0.0104211	8.89832	2.5125	2.52734
2002			10.	Cervix uteri cancer		4.89564	4.89564	4.89564		0	4.89564		0.00338794	0.014024	2.66962	1.18451	1.0241
2002			11.	Corpus uteri cancer		1.00114	1.00114	1.00114		0	1.00114		1.20311e-05	0.00564923	0.385047	0.195796	0.41464
2002			12.	Ovary cancer		2.11396	2.11396	2.11396		0	2.11396		0.00214691	0.0252347	1.18006	0.405614	0.500908
2002			13.	Prostate cancer		5.92333	5.92333	5.92333		5.92333	0		0.00293458	0.00716554	0.671134	1.35358	3.88852
2002			14.	Bladder cancer		14.9877	14.9877	14.9877		12.4272	2.56048		0.00580467	0.011076	4.75035	4.13968	6.08081
2002			15.	Lymphomas, multiple myeloma		11.8069	11.8069	11.8069		6.98637	4.82054		0.358921	1.00053	5.86844	2.00848	2.57053
2002			16.	Leukaemia		13.6588	13.6588	13.6588		7.95005	5.70878		1.12775	1.63093	7.05856	1.61819	2.2234
2002		B.	Other neoplasms			19.4735	19.4735	19.4735		10.7773	8.69611		0.352048	0.549833	8.58501	4.17388	5.81269
2002		C.	Diabetes mellitus			31.6939	31.6939	31.6939		14.4781	17.2159		0.115139	0.0843965	7.52339	8.94396	15.0271
2002		D.	Endocrine disorders			19.6943	19.6943	19.6943		9.55278	10.1415		2.61052	0.537011	5.51956	4.11229	6.91487
2002		E.	Neuropsychiatric conditions			51.0064	51.0064	51.0064		34.2933	16.7131		3.00715	2.50247	31.0164	4.25571	10.2247
2002			1.	Unipolar depressive disorders		0.109095	0.109095	0.109095		0.0448025	0.0642929		0.0111465	0.00996978	0.0599628	0.00559468	0.0224217
2002			2.	Bipolar disorder		0.0187943	0.0187943	0.0187943		0.00727405	0.0115202		0.00248748	0.00223438	0.00813803	0.0012411	0.00469326
2002			3.	Schizophrenia		0.270727	0.270727	0.270727		0.157768	0.112959		0	0.00603423	0.126527	0.0750207	0.0631457
2002			4.	Epilepsy		4.77336	4.77336	4.77336		2.73316	2.0402		0.499862	0.556199	2.9157	0.291696	0.50991
2002			5.	Alcohol use disorders		3.26147	3.26147	3.26147		3.01875	0.242715		0	0.000319235	2.91784	0.160558	0.182745
2002			6.	Alzheimer and other dementias		3.39117	3.39117	3.39117		1.66136	1.72981		0.0529394	0.0327772	0.251746	0.423337	2.63037
2002			7.	Parkinson disease		2.50911	2.50911	2.50911		1.4051	1.10401		0.203366	0.17003	0.729744	0.276932	1.12903
2002			8.	Multiple sclerosis		0.519743	0.519743	0.519743		0.253826	0.265918		0	0.0117421	0.221642	0.121087	0.165273
2002			9.	Drug use disorders		19.0951	19.0951	19.0951		15.7931	3.30199		0	0.000580239	18.4069	0.440059	0.247553
2002			10.	Post-traumatic stress disorder		0.00379509	0.00379509	0.00379509		0.00178039	0.00201471		0.000501302	0.000441301	0.00173966	0.000257143	0.000855688
2002			11.	Obsessive-compulsive disorder		0	0	0		0	0		0	0	0	0	0
2002			12.	Panic disorder		0	0	0		0	0		0	0	0	0	0
2002			13.	Insomnia (primary)		0	0	0		0	0		0	0	0	0	0
2002			14.	Migraine		0	0	0		0	0		0	0	0	0	0
2002		F.	Sense organ diseases			0.875249	0.875249	0.875249		0.446001	0.429248		0.0189933	0.0120554	0.0254745	0.126519	0.692207
2002			1.	Glaucoma		0.00130545	0.00130545	0.00130545		0.000364164	0.000941284		0	0	0	0	0.00130545
2002			2.	Cataracts		0	0	0		0	0		0	0	0	0	0
2002			3.	Vision disorders, age-related		0	0	0		0	0		0	0	0	0	0
2002			4.	Hearing loss, adult onset		0	0	0		0	0		0	0	0	0	0
2002		G.	Cardiovascular diseases			677.395	677.395	677.395		360.201	317.194		14.5519	5.72402	151.037	146.293	359.789
2002			1.	Rheumatic heart disease		10.0982	10.0982	10.0982		4.72283	5.37539		0.409692	0.868096	6.40236	0.834886	1.58318
2002			2.	Hypertensive heart disease		74.7979	74.7979	74.7979		38.5625	36.2355		0.308799	0.189518	13.9266	17.3292	43.0438
2002			3.	Ischaemic heart disease		327.344	327.344	327.344		190.485	136.859		0.451392	0.253647	79.6268	80.7725	166.24
2002			4.	Cerebrovascular disease		130.898	130.898	130.898		66.055	64.8434		2.46921	2.24061	24.2663	26.769	75.1533
2002			5.	Inflammatory heart diseases		25.9282	25.9282	25.9282		14.1313	11.797		1.20778	0.480027	5.98206	4.54552	13.7129
2002		H.	Respiratory diseases			81.0038	81.0038	81.0038		46.354	34.6498		6.12268	0.903686	18.2161	16.0492	39.7121
2002			1.	Chronic obstructive pulmonary disease		41.1931	41.1931	41.1931		23.8063	17.3868		0.495451	0.129435	6.56517	9.53206	24.471
2002			2.	Asthma		6.66072	6.66072	6.66072		3.961	2.69971		0.15394	0.207704	5.23546	0.475126	0.588482
2002		I.	Digestive diseases			89.6566	89.6566	89.6566		47.0973	42.5593		3.05577	1.25321	29.0546	22.2895	34.0035
2002			1.	Peptic ulcer disease		5.1512	5.1512	5.1512		3.16371	1.98749		0.041223	0.0398667	1.54775	1.00871	2.51365
2002			2.	Cirrhosis of the liver		37.9179	37.9179	37.9179		21.5081	16.4097		0.873064	0.404457	13.3255	10.3631	12.9518
2002		J.	Genitourinary diseases			57.7984	57.7984	57.7984		31.8147	25.9837		1.2497	0.968067	17.4799	13.3281	24.7725
2002			1.	Nephritis and nephrosis		42.8804	42.8804	42.8804		23.5459	19.3345		0.631318	0.592067	13.251	10.5297	17.8764
2002			2.	Benign prostatic hypertrophy		1.59057	1.59057	1.59057		1.59057	0		0	0	0.0748965	0.292112	1.22356
2002		K.	Skin diseases			3.68268	3.68268	3.68268		1.29849	2.38419		0.0748025	0.0350279	0.799049	0.760589	2.01321
2002		L.	Musculoskeletal diseases			1.9444	1.9444	1.9444		0.864666	1.07973		0.167404	0.107874	0.703675	0.246798	0.718645
2002			1.	Rheumatoid arthritis		0.400426	0.400426	0.400426		0.135978	0.264448		0	0.00475451	0.116543	0.0678473	0.211281
2002			2.	Osteoarthritis		0.0924618	0.0924618	0.0924618		0.0452378	0.047224		0.00566802	0	0.0173232	0.0126556	0.056815
2002		M.	Congenital anomalies			43.6799	43.6799	43.6799		23.3472	20.3326		39.1121	2.07794	1.97721	0.218769	0.293891
2002		N.	Oral conditions			0.0533112	0.0533112	0.0533112		0.0207607	0.0325504		0.00831266	0.00268403	0.0117922	0.0118135	0.0187089
2002	III.	Injuries				210.73	210.73	210.73		150.965	59.7653		23.1653	22.795	126.741	16.8429	21.1862
2002		A.	Unintentional injuries			177.194	177.194	177.194		126.319	50.8749		22.6015	21.9023	98.3202	14.7265	19.6436
2002			1.	Road traffic accidents		96.2673	96.2673	96.2673		71.9777	24.2896		8.45082	11.849	56.857	8.71506	10.3955
2002			2.	Poisonings		7.44004	7.44004	7.44004		5.31373	2.12631		0.955589	0.205848	5.23052	0.484193	0.563893
2002			3.	Falls		11.6493	11.6493	11.6493		8.5314	3.11787		1.6412	1.11931	5.34286	1.1372	2.4087
2002			4.	Fires		12.9461	12.9461	12.9461		5.48124	7.46484		2.48572	1.10411	7.31614	0.64369	1.39641
2002			5.	Drownings		13.4319	13.4319	13.4319		10.7387	2.69318		2.70521	2.76303	7.21136	0.400072	0.352185
2002			6.	Other unintentional injuries		35.4595	35.4595	35.4595		24.2765	11.1831		6.36298	4.86101	16.3624	3.34629	4.52688
2002		B.	Intentional injuries			33.5364	33.5364	33.5364		24.646	8.89041		0.563784	0.892775	28.4208	2.11642	1.54259
2002			1.	Self-inflicted injuries		14.2937	14.2937	14.2937		8.66383	5.62987		0.10725	0.348107	12.2773	0.893096	0.66796
2002			2.	Violence		10.4449	10.4449	10.4449		8.06701	2.37792		0.364069	0.379004	8.42357	0.70206	0.576221
2002			3.	War		7.17767	7.17767	7.17767		6.47052	0.707155		0.0151826	0.0935782	6.38701	0.434384	0.247513
2015	Population (millions)					396.233	397.101	394.937		198.433	197.801		44.2063	81.8053	242.709	17.027	10.4861
2015		All Causes				2312.39	2186.39	2494.34		1289.61	1022.78		325.748	47.006	699.541	382.439	857.655
2015	I.	Communicable, maternal, perinatal and nutritional conditions				385.263	307.249	463.958		218.729	166.534		227.826	8.3818	89.4459	16.8549	42.7553
2015		A.	Infectious and parasitic diseases			190.145	146.385	237.049		113.947	76.1988		82.1515	3.10309	71.1429	11.2447	22.5032
2015			1.	Tuberculosis		17.297	11.6191	22.1382		9.5334	7.76364		1.49482	0.417141	9.58216	2.67353	3.12939
2015			2.	STDs excluding HIV		3.82213	2.90921	4.5208		2.08512	1.73701		0.0547038	0.00744629	2.1236	0.862917	0.773464
2015			3.	HIV/AIDS		49.7114	43.3486	64.5129		38.8041	10.9073		0.818093	0.407914	47.6077	0.782113	0.095534
2015			4.	Diarrhoeal diseases		48.7224	35.623	60.9353		25.9215	22.8009		41.852	0.260759	1.48678	0.933809	4.18904
2015			5.	Childhood-cluster diseases		8.56713	5.93418	10.5907		4.34271	4.22442		7.9087	0.528572	0.0872955	0.00962032	0.0329421
2015				a.	Pertussis	2.76648	1.93771	3.39684		1.39794	1.36854		2.76648	0	0	0	0
2015				d.	Measles	4.20032	2.81935	5.19591		2.13996	2.06036		3.70819	0.492121	0	0	0
2015				e.	Tetanus	1.57047	1.15265	1.96593		0.797619	0.772849		1.42387	0.0364494	0.0872946	0.00962032	0.0132329
2015			6.	Meningitis		6.70895	4.79862	8.2905		3.019	3.68995		5.31388	0.342693	0.61379	0.151242	0.287347
2015			7.	Hepatitis B and C		6.62854	5.53348	7.88304		3.48159	3.14695		0.78284	0.175723	2.30118	1.29323	2.07557
2015			8.	Malaria		3.49924	2.8157	4.71339		1.68325	1.81598		2.87746	0.0545088	0.332809	0.0648718	0.169589
2015			9.	Tropical-cluster diseases		6.95573	6.12327	8.01738		4.12554	2.83019		0.128542	0.169432	2.19359	1.36802	3.09615
2015			10.	Leprosy		0.108687	0.0784469	0.123035		0.0467459	0.061941		0.000878538	0	0.0218555	0.0221653	0.0637875
2015			11.	Dengue		0.162097	0.11697	0.187809		0.102927	0.0591707		0.0240061	0.0941883	0.0237152	0.00551553	0.0146723
2015			12.	Japanese encephalitis		0	0	0		0	0		0	0	0	0	0
2015			13.	Trachoma		0	0	0		0	0		0	0	0	0	0
2015			14.	Intestinal nematode infections		0.0846388	0.0602038	0.101214		0.0512411	0.0333977		0.00303681	0.00442824	0.0415604	0.0223196	0.0132938
2015		B.	Respiratory infections			84.8368	64.5083	101.353		45.9081	38.9286		49.105	4.69349	8.1896	5.00335	17.8453
2015		C.	Maternal conditions			9.35088	6.71881	11.9117		0	9.35088		0	0.00123165	9.34965	0	0
2015		D.	Perinatal conditions			89.7035	81.3164	99.8028		53.5611	36.1424		89.7035	0	0	0	0
2015		E.	Nutritional deficiencies			11.2269	8.32098	13.8413		5.31372	5.91317		6.86546	0.583994	0.763694	0.606919	2.40683
2015			1.	Protein-energy malnutrition		5.55463	3.94192	7.10326		2.74417	2.81045		4.61665	0.153379	0.13403	0.17573	0.474835
2015			2.	Iodine deficiency		0.251674	0.186309	0.304966		0.141149	0.110525		0.168732	0.00305916	0.0108722	0.0159602	0.0530507
2015			3.	Vitamin A deficiency		0.266057	0.185904	0.308665		0.153414	0.112643		0.0132635	0.00276211	0.0761133	0.0511	0.122818
2015			4.	Iron-deficiency anaemia		3.96696	3.17336	4.67537		1.63142	2.33555		1.0738	0.373376	0.505434	0.338249	1.6761
2015	II.	Noncommunicable diseases				1650.18	1603.18	1742.82		874.266	775.913		70.7981	15.5396	437.792	341.072	784.977
2015		A.	Malignant neoplasms			231.184	227.45	236.502		132.653	98.5306		3.52544	4.25186	93.5192	55.0926	74.7946
2015			1.	Mouth and oropharynx cancers		6.83595	6.67278	6.99394		4.79304	2.04291		0.0377722	0.0456314	3.15378	1.66841	1.93036
2015			2.	Oesophagus cancer		6.93968	6.86068	6.94456		3.96103	2.97865		0.00958737	0.012871	2.27615	1.95809	2.68298
2015			3.	Stomach cancer		23.5363	23.212	23.519		14.3557	9.1806		0.0270699	0.0790392	7.90306	6.30682	9.22027
2015			4.	Colon and rectum cancers		14.0788	13.8136	14.1672		7.89789	6.18096		0.00577521	0.0510342	5.97126	3.13731	4.91347
2015			5.	Liver cancer		12.1917	12.0747	12.2644		7.46445	4.72721		0.079146	0.0633775	4.58453	3.40214	4.06247
2015			6.	Pancreas cancer		5.38083	5.28312	5.41505		3.17023	2.2106		0.00106275	0.00425134	1.81512	1.48678	2.07362
2015			7.	Trachea, bronchus, lung cancers		32.2318	31.5287	36.1478		25.0724	7.15942		0	0	11.5061	9.97775	10.748
2015			8.	Melanoma and other skin cancers		1.68574	1.65496	1.6848		0.897156	0.788587		0.00800441	0.00714939	0.632206	0.363362	0.675022
2015			9.	Breast cancer		19.5605	19.1664	19.7029		0.00842164	19.5521		0.00126993	0.0113209	12.3388	3.65941	3.54966
2015			10.	Cervix uteri cancer		6.68116	6.54274	6.70732		0	6.68116		0.00385238	0.014897	3.52195	1.73883	1.40164
2015			11.	Corpus uteri cancer		1.42654	1.41139	1.41799		0	1.42654		1.66893e-05	0.00424151	0.520732	0.294101	0.607449
2015			12.	Ovary cancer		2.95541	2.86847	2.98655		0	2.95541		0.00289286	0.0317356	1.62427	0.590475	0.706033
2015			13.	Prostate cancer		8.29919	8.2431	8.21196		8.29919	0		0.00387011	0.00850576	1.06211	1.88493	5.33979
2015			14.	Bladder cancer		20.6039	20.3441	20.7509		17.0168	3.5871		0.00674608	0.0112468	6.18584	5.60723	8.79284
2015			15.	Lymphomas, multiple myeloma		16.3006	15.968	16.5737		9.59685	6.70374		0.453273	1.16993	8.11587	2.89317	3.66835
2015			16.	Leukaemia		17.2951	17.0953	17.4674		10.047	7.24813		1.3814	1.78214	8.88688	2.2656	2.97911
2015		B.	Other neoplasms			26.0118	25.7	26.2303		14.1262	11.8856		0.426632	0.571263	11.444	5.82146	7.74845
2015		C.	Diabetes mellitus			55.2177	52.3332	57.4151		20.9558	34.2619		0.117325	0.0723479	14.4476	14.9653	25.6152
2015		D.	Endocrine disorders			24.1285	23.4142	25.104		11.7201	12.4084		2.01726	0.425799	6.79767	5.40357	9.48417
2015		E.	Neuropsychiatric conditions			63.6844	61.8178	67.1973		42.8907	20.7938		2.64773	2.08725	38.32	5.72965	14.8998
2015			1.	Unipolar depressive disorders		0.128411	0.123838	0.137274		0.0541672	0.0742434		0.0101613	0.00770648	0.0691565	0.00756232	0.033824
2015			2.	Bipolar disorder		0.0220535	0.021293	0.0236474		0.00838257	0.0136709		0.00226654	0.00172673	0.00924797	0.00168027	0.007132
2015			3.	Schizophrenia		0.356431	0.349276	0.373779		0.207013	0.149418		0	0.00567164	0.159918	0.0997169	0.0911248
2015			4.	Epilepsy		5.52599	5.24246	5.8401		3.2487	2.27729		0.442988	0.475035	3.43411	0.432586	0.741267
2015			5.	Alcohol use disorders		4.08368	3.96295	4.41614		3.77109	0.312587		0	0.00028756	3.63704	0.220949	0.225406
2015			6.	Alzheimer and other dementias		5.08495	5.02652	5.18228		2.40033	2.68462		0.0432885	0.0298414	0.338249	0.575135	4.09844
2015			7.	Parkinson disease		3.26369	3.18653	3.40526		1.83134	1.43235		0.185716	0.131958	0.849134	0.388559	1.70833
2015			8.	Multiple sclerosis		0.682567	0.668076	0.710223		0.34442	0.338147		0	0.00924374	0.270681	0.159813	0.242829
2015			9.	Drug use disorders		24.0815	23.4632	25.7187		20.0783	4.00323		0	0.000524095	23.1805	0.563359	0.337097
2015			10.	Post-traumatic stress disorder		0.00439704	0.00424503	0.0047222		0.0020517	0.00234533		0.000457791	0.00034143	0.00199197	0.000345586	0.00126026
2015			11.	Obsessive-compulsive disorder		0	0	0		0	0		0	0	0	0	0
2015			12.	Panic disorder		0	0	0		0	0		0	0	0	0	0
2015			13.	Insomnia (primary)		0	0	0		0	0		0	0	0	0	0
2015			14.	Migraine		0	0	0		0	0		0	0	0	0	0
2015		F.	Sense organ diseases			1.27083	1.26049	1.29112		0.655997	0.614834		0.0157292	0.0104137	0.0313083	0.164329	1.04905
2015			1.	Glaucoma		0.00228919	0.00224192	0.00234316		0.000588472	0.00170072		0	0	0	0	0.00228919
2015			2.	Cataracts		0	0	0		0	0		0	0	0	0	0
2015			3.	Vision disorders, age-related		0	0	0		0	0		0	0	0	0	0
2015			4.	Hearing loss, adult onset		0	0	0		0	0		0	0	0	0	0
2015		G.	Cardiovascular diseases			906.961	888.106	962.466		463.95	443.011		15.9923	4.1023	189.679	184.845	512.342
2015			1.	Rheumatic heart disease		11.4106	10.6662	12.679		5.66253	5.74805		0.446201	0.565695	7.05404	1.07512	2.26953
2015			2.	Hypertensive heart disease		101.664	98.7552	107.83		51.3137	50.3506		0.347371	0.150755	17.185	21.1185	62.8627
2015			3.	Ischaemic heart disease		435.152	425.74	463.915		242.055	193.097		0.512176	0.190618	102.66	102.379	229.41
2015			4.	Cerebrovascular disease		177.058	174.18	186.246		85.1055	91.9525		2.79441	1.7665	30.0489	34.1959	108.252
2015			5.	Inflammatory heart diseases		34.2251	33.6178	36.4449		17.8734	16.3517		1.31702	0.310338	7.22416	5.68881	19.6848
2015		H.	Respiratory diseases			116.067	109.692	125.873		67.0262	49.041		6.18754	0.800385	25.7777	23.8136	59.488
2015			1.	Chronic obstructive pulmonary disease		62.642	59.4717	69.3006		36.6054	26.0367		0.498954	0.106546	10.1439	14.5556	37.3371
2015			2.	Asthma		8.81425	8.10354	9.58736		5.41433	3.39992		0.148446	0.190538	6.87305	0.699082	0.903134
2015		I.	Digestive diseases			101.95	95.0085	110.823		53.3514	48.5989		2.38182	0.783527	32.8797	25.8134	40.0918
2015			1.	Peptic ulcer disease		6.24311	5.83897	6.71615		3.80567	2.43744		0.0339763	0.0233743	1.82994	1.22633	3.12949
2015			2.	Cirrhosis of the liver		41.799	38.6526	46.1002		23.7391	18.0598		0.767875	0.264824	14.6543	11.2853	14.8266
2015		J.	Genitourinary diseases			75.3028	73.4587	78.1021		41.9502	33.3526		0.949954	0.620603	20.8652	17.6759	35.1911
2015			1.	Nephritis and nephrosis		55.5827	54.3103	57.4755		30.9083	24.6744		0.475223	0.393661	15.664	13.8449	25.2048
2015			2.	Benign prostatic hypertrophy		2.28051	2.28279	2.27929		2.28051	0		0	0	0.0994456	0.385152	1.79591
2015		K.	Skin diseases			5.16243	4.98838	5.28602		1.8198	3.34263		0.0623573	0.0290598	1.08757	1.12349	2.85995
2015		L.	Musculoskeletal diseases			2.39231	2.32221	2.50974		1.0499	1.34242		0.143737	0.0893599	0.838235	0.329197	0.991783
2015			1.	Rheumatoid arthritis		0.545249	0.534661	0.563459		0.182964	0.362285		0	0.00443273	0.15047	0.0917431	0.298603
2015			2.	Osteoarthritis		0.124373	0.122594	0.127878		0.0581769	0.0661962		0.00511146	0	0.0227716	0.0166218	0.0798683
2015		M.	Congenital anomalies			40.7782	37.5587	43.9497		22.0912	18.687		36.3235	1.69316	2.08888	0.279291	0.393399
2015		N.	Oral conditions			0.0672336	0.0650599	0.0703415		0.0247656	0.042468		0.00677061	0.00225392	0.0155768	0.0153905	0.0272418
2015	III.	Injuries				276.946	275.963	287.557		196.616	80.3308		27.1243	23.0846	172.304	24.5117	29.9222
2015		A.	Unintentional injuries			232.634	233.789	236.058		163.861	68.7732		26.4747	22.2016	134.92	21.3269	27.7107
2015			1.	Road traffic accidents		138.436	144.535	134.84		101.772	36.6644		11.0755	13.3925	86.7704	12.9353	14.2623
2015			2.	Poisonings		8.8701	8.51782	9.67027		6.30576	2.56434		1.00795	0.174845	6.2577	0.662655	0.766946
2015			3.	Falls		14.8135	14.4049	15.4435		10.5946	4.21893		1.85321	1.02939	6.84108	1.60804	3.48179
2015			4.	Fires		14.8022	14.3498	16.1311		6.14642	8.65578		2.68945	0.971334	8.06418	0.962006	2.11523
2015			5.	Drownings		14.0729	12.9414	15.4795		11.2098	2.86304		2.96077	2.35955	7.6957	0.53943	0.51743
2015			6.	Other unintentional injuries		41.6397	39.0402	44.4939		27.8331	13.8066		6.88785	4.27397	19.2914	4.61949	6.56706
2015		B.	Intentional injuries			44.3119	42.1741	51.499		32.7542	11.5576		0.64958	0.88293	37.3831	3.18481	2.21147
2015			1.	Self-inflicted injuries		18.661	18.3419	19.4119		11.5561	7.10488		0.119403	0.342802	15.9692	1.30382	0.925756
2015			2.	Violence		13.6445	13.1965	14.5621		10.4722	3.17232		0.417758	0.353174	10.9754	1.05754	0.84065
2015			3.	War		9.81526	8.46252	15.2127		8.76881	1.04644		0.0163976	0.0970045	8.62334	0.702185	0.376336
2030	Population (millions)					481.891	486.251	476.296		237.232	244.658		42.9658	86.2374	305.878	28.0853	18.724
2030		All Causes				3028.96	2773.82	3309.25		1630.04	1398.92		224.977	42.0809	906.819	523.48	1331.6
2030	I.	Communicable, maternal, perinatal and nutritional conditions				348.908	206.671	441.631		207.893	141.015		140.15	5.70802	137.725	18.963	46.3614
2030		A.	Infectious and parasitic diseases			210.404	114.942	260.058		131.989	78.4152		44.6689	2.85504	124.804	13.3623	24.7138
2030			1.	Tuberculosis		10.1877	4.1844	19.8294		5.4977	4.69002		0.610771	0.19117	5.56275	1.73697	2.08606
2030			2.	STDs excluding HIV		3.67547	2.09088	4.91005		1.97938	1.69608		0.0299062	0.00304984	1.91647	0.802769	0.923272
2030			3.	HIV/AIDS		115.511	64.0935	119.797		80.1831	35.328		1.26952	1.6003	108.116	4.04677	0.478716
2030			4.	Diarrhoeal diseases		28.3749	14.4785	42.7535		15.4825	12.8925		21.8614	0.0992022	1.11312	0.834674	4.46654
2030			5.	Childhood-cluster diseases		4.70429	2.08482	7.21672		2.47413	2.23016		4.32507	0.280897	0.0566404	0.00772754	0.033955
2030				a.	Pertussis	1.56606	0.702919	2.42593		0.820674	0.745382		1.56606	0	0	0	0
2030				d.	Measles	2.3433	0.989134	3.55106		1.24322	1.10008		2.07859	0.264717	0	0	0
2030				e.	Tetanus	0.76863	0.373841	1.21042		0.40524	0.36339		0.674549	0.0161785	0.0566397	0.00772754	0.0135357
2030			6.	Meningitis		3.98171	1.99874	6.10973		1.87954	2.10218		2.96372	0.157466	0.40231	0.138139	0.320077
2030			7.	Hepatitis B and C		5.30365	3.69001	7.04311		2.68969	2.61396		0.446056	0.0791683	1.65568	1.00706	2.11568
2030			8.	Malaria		1.59334	0.904652	2.58595		0.812048	0.781292		1.17114	0.02075	0.19938	0.0437292	0.158341
2030			9.	Tropical-cluster diseases		5.39496	4.19017	6.68096		2.9483	2.44666		0.0737613	0.0946197	1.55727	0.841591	2.82772
2030			10.	Leprosy		0.151403	0.0802706	0.189132		0.063263	0.0881395		0.000483317	0	0.0254091	0.0274798	0.0980303
2030			11.	Dengue		0.0754723	0.0475889	0.104714		0.050171	0.0253013		0.00724376	0.0344621	0.013601	0.00524712	0.0149183
2030			12.	Japanese encephalitis		0	0	0		0	0		0	0	0	0	0
2030			13.	Trachoma		0	0	0		0	0		0	0	0	0	0
2030			14.	Intestinal nematode infections		0.0842698	0.043514	0.113556		0.0506111	0.0336586		0.00181584	0.00155381	0.0353615	0.0263703	0.0191683
2030		B.	Respiratory infections			60.2759	35.5432	82.8276		33.4431	26.8328		26.3936	2.56912	6.8755	5.05517	19.3825
2030		C.	Maternal conditions			5.49517	2.67505	8.85124		0	5.49517		0	0.000453473	5.49472	0	0
2030		D.	Perinatal conditions			65.394	49.5649	79.1753		38.9223	26.4718		65.394	0	0	0	0
2030		E.	Nutritional deficiencies			7.33813	3.94678	10.7182		3.53822	3.79992		3.69332	0.283407	0.550777	0.545551	2.26508
2030			1.	Protein-energy malnutrition		3.36917	1.56749	5.21005		1.75981	1.60935		2.42108	0.0774286	0.101615	0.194214	0.574827
2030			2.	Iodine deficiency		0.159844	0.0884402	0.235443		0.0916187	0.0682248		0.0929508	0.00140372	0.00805112	0.0117848	0.0456531
2030			3.	Vitamin A deficiency		0.3033	0.14969	0.397833		0.180269	0.123031		0.00745212	0.00168996	0.0748075	0.0675829	0.151767
2030			4.	Iron-deficiency anaemia		2.79171	1.79822	3.76814		1.10823	1.68348		0.596612	0.180524	0.339975	0.253029	1.42157
2030	II.	Noncommunicable diseases				2317.33	2203.97	2484.76		1169.31	1148.03		58.4672	12.832	546.082	466.447	1233.51
2030		A.	Malignant neoplasms			339.199	328.72	354.341		195.34	143.86		3.70194	4.53872	125.779	84.8666	120.313
2030			1.	Mouth and oropharynx cancers		9.99564	9.57459	10.2883		6.89564	3.1		0.0372275	0.0506648	4.10048	2.68747	3.1198
2030			2.	Oesophagus cancer		10.361	10.2104	10.2564		5.79088	4.57012		0.0071789	0.011275	3.1259	2.88864	4.328
2030			3.	Stomach cancer		34.9039	34.1799	34.4624		21.1692	13.7346		0.019388	0.069592	10.6722	9.23336	14.9093
2030			4.	Colon and rectum cancers		20.3091	19.5351	20.451		11.2863	9.02276		0.0051821	0.0459516	7.8111	4.69343	7.7534
2030			5.	Liver cancer		17.5362	17.3966	17.4392		10.6493	6.88691		0.07641	0.0609353	6.08686	4.93117	6.38083
2030			6.	Pancreas cancer		7.94206	7.67257	7.96661		4.62458	3.31748		0.0010652	0.00413717	2.45586	2.19732	3.28368
2030			7.	Trachea, bronchus, lung cancers		54.7684	52.4756	68.9946		42.54	12.2284		0	0	18.7316	17.4907	18.546
2030			8.	Melanoma and other skin cancers		2.4311	2.33841	2.41684		1.2918	1.1393		0.00539911	0.00632954	0.820177	0.531075	1.06812
2030			9.	Breast cancer		27.6983	26.1095	28.2621		0.0114225	27.6869		0.00115756	0.0100599	16.1643	5.59607	5.9267
2030			10.	Cervix uteri cancer		9.49673	9.0086	9.59842		0	9.49673		0.00237556	0.0125253	4.42871	2.65339	2.39972
2030			11.	Corpus uteri cancer		2.18318	2.11909	2.16384		0	2.18318		2.17747e-05	0.00337211	0.686944	0.466443	1.0264
2030			12.	Ovary cancer		4.24372	3.86425	4.37944		0	4.24372		0.00366613	0.0385395	2.07735	0.939095	1.18507
2030			13.	Prostate cancer		12.6134	12.6497	12.1634		12.6134	0		0.00490193	0.0101669	1.57561	2.92106	8.10165
2030			14.	Bladder cancer		29.283	28.9865	28.9085		23.8932	5.38981		0.00665867	0.0104611	8.38712	7.66471	13.2141
2030			15.	Lymphomas, multiple myeloma		22.794	21.6904	23.4233		13.1212	9.67283		0.523121	1.31611	10.4781	4.6991	5.77757
2030			16.	Leukaemia		22.1057	21.505	22.3819		12.9139	9.19176		1.44613	1.91395	10.7691	3.39181	4.58472
2030		B.	Other neoplasms			36.5924	35.7877	36.7774		19.6963	16.8961		0.442985	0.58306	14.8563	8.39936	12.3106
2030		C.	Diabetes mellitus			84.2377	76.2975	89.2839		30.747	53.4907		0.0967194	0.0578583	19.147	22.4252	42.5109
2030		D.	Endocrine disorders			31.9786	30.6144	33.2458		15.0666	16.9121		1.32159	0.31951	8.53272	7.13907	14.6657
2030		E.	Neuropsychiatric conditions			80.535	76.3518	86.2748		53.275	27.26		1.91866	1.66591	45.4045	8.26126	23.2847
2030			1.	Unipolar depressive disorders		0.156145	0.145886	0.16958		0.0657113	0.0904341		0.007294	0.00621903	0.0778837	0.0103576	0.054391
2030			2.	Bipolar disorder		0.0272498	0.0256038	0.0294992		0.00985124	0.0173986		0.00162609	0.00139288	0.0101361	0.00229885	0.0117959
2030			3.	Schizophrenia		0.494639	0.47462	0.521178		0.284407	0.210233		0	0.00492817	0.192993	0.146876	0.149843
2030			4.	Epilepsy		6.40784	5.87513	6.9496		3.84868	2.55916		0.326073	0.378827	3.83433	0.700252	1.16836
2030			5.	Alcohol use disorders		4.87475	4.59339	5.43813		4.47049	0.404261		0	0.000219505	4.1574	0.349497	0.36763
2030			6.	Alzheimer and other dementias		7.78403	7.7063	7.74718		3.46535	4.31867		0.0311099	0.0223606	0.448497	0.870911	6.41115
2030			7.	Parkinson disease		4.5812	4.47603	4.72999		2.52319	2.058		0.134335	0.10677	0.950327	0.628604	2.76116
2030			8.	Multiple sclerosis		0.923696	0.888167	0.961012		0.457567	0.466129		0	0.00731785	0.320273	0.222754	0.373351
2030			9.	Drug use disorders		29.1734	27.3454	32.4067		24.5372	4.6362		0	0.000402133	27.9441	0.727755	0.501136
2030			10.	Post-traumatic stress disorder		0.00530527	0.00498092	0.00575832		0.00241117	0.00289409		0.000329274	0.000275949	0.00219489	0.000475184	0.00202997
2030			11.	Obsessive-compulsive disorder		0	0	0		0	0		0	0	0	0	0
2030			12.	Panic disorder		0	0	0		0	0		0	0	0	0	0
2030			13.	Insomnia (primary)		0	0	0		0	0		0	0	0	0	0
2030			14.	Migraine		0	0	0		0	0		0	0	0	0	0
2030		F.	Sense organ diseases			1.80733	1.80297	1.77546		0.880856	0.92647		0.0114919	0.00819912	0.0389975	0.210089	1.53855
2030			1.	Glaucoma		0.00384522	0.0037465	0.00390599		0.00092604	0.00291918		0	0	0	0	0.00384522
2030			2.	Cataracts		0	0	0		0	0		0	0	0	0	0
2030			3.	Vision disorders, age-related		0	0	0		0	0		0	0	0	0	0
2030			4.	Hearing loss, adult onset		0	0	0		0	0		0	0	0	0	0
2030		G.	Cardiovascular diseases			1294.5	1249.36	1381		610.579	683.925		14.9825	2.75301	228.601	241.086	807.082
2030			1.	Rheumatic heart disease		13.1175	11.5934	15.3461		6.56544	6.55201		0.407776	0.337124	7.33936	1.43544	3.59775
2030			2.	Hypertensive heart disease		145.945	139.752	155.16		67.6847	78.2603		0.342349	0.113753	19.6668	26.5753	99.2468
2030			3.	Ischaemic heart disease		619.387	594.612	667.086		318.202	301.185		0.508605	0.12684	127.187	133.506	358.058
2030			4.	Cerebrovascular disease		259.327	253.208	272.285		114.106	145.22		2.80112	1.2597	35.8956	45.4516	173.919
2030			5.	Inflammatory heart diseases		47.9368	46.4405	51.1631		23.0824	24.8544		1.18363	0.195103	8.46807	7.31902	30.771
2030		H.	Respiratory diseases			171.821	155.087	199.215		98.0858	73.7348		5.16679	0.67521	35.025	36.1537	94.7998
2030			1.	Chronic obstructive pulmonary disease		97.4884	88.1194	117.911		56.3338	41.1547		0.402018	0.0886228	14.8962	22.307	59.7946
2030			2.	Asthma		11.4389	9.6689	13.4843		7.16968	4.26922		0.124073	0.159269	8.48862	1.17376	1.49318
2030		I.	Digestive diseases			126.754	109.523	144.291		65.2666	61.4878		1.60602	0.470846	38.6452	30.6615	55.3709
2030			1.	Peptic ulcer disease		8.32262	7.31511	9.19666		5.03206	3.29055		0.0236217	0.0141187	2.18937	1.58901	4.50649
2030			2.	Cirrhosis of the liver		50.1657	42.293	58.8702		28.1389	22.0268		0.56232	0.169838	16.8794	12.5049	20.0493
2030		J.	Genitourinary diseases			105.782	102.081	109.195		58.1308	47.6508		0.59923	0.373304	25.5414	24.4774	54.7903
2030			1.	Nephritis and nephrosis		76.9315	74.4032	79.2662		42.1221	34.8095		0.306793	0.238499	19.0666	18.6382	38.6814
2030			2.	Benign prostatic hypertrophy		3.26743	3.33718	3.08533		3.26743	0		0	0	0.14306	0.53823	2.58614
2030		K.	Skin diseases			7.91066	7.56827	8.14083		2.68115	5.22951		0.0438656	0.020549	1.34534	1.88217	4.61873
2030		L.	Musculoskeletal diseases			3.18619	3.03712	3.34458		1.3626	1.82359		0.0997434	0.0751314	0.986854	0.462339	1.56212
2030			1.	Rheumatoid arthritis		0.795505	0.767635	0.820714		0.254316	0.541189		0	0.00393955	0.190929	0.130074	0.470562
2030			2.	Osteoarthritis		0.180086	0.176108	0.181683		0.0802429	0.0998434		0.00368517	0	0.0310627	0.021761	0.123577
2030		M.	Congenital anomalies			32.9348	27.6519	37.7762		18.1685	14.7663		28.4708	1.28902	2.15956	0.403121	0.612227
2030		N.	Oral conditions			0.0910976	0.0861694	0.0965645		0.0293267	0.0617709		0.00482921	0.00170174	0.0197392	0.0197272	0.0451003
2030	III.	Injuries				362.715	363.176	382.864		252.839	109.876		26.3599	23.5409	223.012	38.0691	51.7332
2030		A.	Unintentional injuries			304.933	310.456	314.825		210.136	94.7967		25.7116	22.6532	175.829	32.7921	47.9472
2030			1.	Road traffic accidents		194.092	209.343	191.523		139.864	54.228		12.0485	15.3964	122.226	19.9822	24.4387
2030			2.	Poisonings		10.7664	9.84637	12.4256		7.59806	3.16832		0.859373	0.146954	7.40152	1.01811	1.34043
2030			3.	Falls		19.5704	18.7328	20.5604		13.3442	6.22621		1.71645	0.923524	8.4345	2.48813	6.00778
2030			4.	Fires		17.2287	16.225	19.2878		6.65582	10.5728		2.31562	0.852384	8.70967	1.51148	3.8395
2030			5.	Drownings		13.9372	11.8391	16.5347		11.0256	2.91156		2.6841	1.88761	7.7282	0.786894	0.850343
2030			6.	Other unintentional injuries		49.3388	44.4698	54.4934		31.6491	17.6898		6.08751	3.44635	21.3292	7.00531	11.4704
2030		B.	Intentional injuries			57.7816	52.7194	68.0389		42.7026	15.079		0.648335	0.887651	47.1827	5.27693	3.78601
2030			1.	Self-inflicted injuries		24.7539	24.2513	25.8059		15.6318	9.12208		0.125663	0.356087	20.5071	2.14746	1.61752
2030			2.	Violence		17.771	16.9796	19.512		13.6379	4.13311		0.401404	0.331971	13.8796	1.72857	1.4294
2030			3.	War		12.3395	8.59948	19.5985		10.8207	1.51875		0.0145374	0.0935138	10.3738	1.22591	0.631694

## Sheet: South Asia
Deaths by cause, scenario, sex and age for the years 2002, 2015 and 2030
Source: Mathers CD, Loncar D (2006). Projections of global mortality and burden of disease from 2002 to 2030.
South Asia
						Total deaths ('000)				Baseline deaths ('000)			Baseline projections ('000) by age group
Year		Cause				Baseline	Optimistic	Pessimistic		Male	Female		0-4	5-14	15-59	60-69	70+
2002	Population (millions)					1412.22	1412.22	1412.22		726.993	685.223		171.544	320.937	818.287	62.4834	38.9642
2002		All Causes				13730.8	13730.8	13730.8		7199.13	6531.66		3528.47	527.956	4123.8	2065.87	3484.7
2002	I.	Communicable, maternal, perinatal and nutritional conditions				5890.41	5890.41	5890.41		3025.82	2864.6		3167.61	314.496	1395.12	374.082	639.102
2002		A.	Infectious and parasitic diseases			2947.51	2947.51	2947.51		1624.4	1323.11		1351.3	168.657	997.837	180.891	248.83
2002			1.	Tuberculosis		535.074	535.074	535.074		336.506	198.568		9.234	11.1688	375.191	87.7758	51.7044
2002			2.	STDs excluding HIV		72.7967	72.7967	72.7967		34.4789	38.3178		36.2548	0.0142633	15.7735	10.5609	10.1932
2002			3.	HIV/AIDS		342.286	342.286	342.286		262.453	79.8337		18.2766	3.81346	314.587	5.00104	0.608434
2002			4.	Diarrhoeal diseases		702.878	702.878	702.878		367.05	335.828		636.238	1.85266	17.3637	10.4983	36.9254
2002			5.	Childhood-cluster diseases		431.525	431.525	431.525		215.612	215.913		406.138	20.5342	4.05932	0.389986	0.403938
2002				a.	Pertussis	138.857	138.857	138.857		69.4283	69.4283		138.857	0	0	0	0
2002				d.	Measles	191.533	191.533	191.533		95.7664	95.7664		173.92	17.613	0	0	0
2002				e.	Tetanus	98.0077	98.0077	98.0077		49.0039	49.0039		90.9486	2.32128	3.9613	0.372713	0.403772
2002			6.	Meningitis		72.5213	72.5213	72.5213		37.489	35.0323		16.9305	19.6433	22.2232	4.89495	8.82945
2002			7.	Hepatitis B and C		41.5274	41.5274	41.5274		28.559	12.9684		0.266634	0.860891	29.9887	4.22358	6.18757
2002			8.	Malaria		14.745	14.745	14.745		7.661	7.08405		13.8451	0.110628	0.481417	0.102309	0.205582
2002			9.	Tropical-cluster diseases		41.0766	41.0766	41.0766		23.1452	17.9313		3.67523	15.482	19.0086	2.09194	0.818737
2002			10.	Leprosy		2.66154	2.66154	2.66154		1.72588	0.935665		0.427902	0.0893956	1.15295	0.358607	0.632685
2002			11.	Dengue		8.42734	8.42734	8.42734		3.9664	4.46095		1.53677	5.3538	0.922062	0.204903	0.409805
2002			12.	Japanese encephalitis		10.2514	10.2514	10.2514		4.92818	5.32326		2.6091	1.82092	5.04187	0.345629	0.433917
2002			13.	Trachoma		0.0748642	0.0748642	0.0748642		0.0748642	0		0.0317398	0	0.0431244	0	0
2002			14.	Intestinal nematode infections		4.3979	4.3979	4.3979		2.14736	2.25054		0.730735	3.417	0.116807	0.0212632	0.112096
2002		B.	Respiratory infections			1505.31	1505.31	1505.31		749.562	755.749		706.706	112.481	135.013	179.664	371.447
2002		C.	Maternal conditions			198.126	198.126	198.126		0	198.126		0	0	198.126	0	0
2002		D.	Perinatal conditions			1058.24	1058.24	1058.24		581.259	476.982		1058.24	0	0	0	0
2002		E.	Nutritional deficiencies			181.225	181.225	181.225		70.5979	110.627		51.3697	33.3576	64.1462	13.5274	18.824
			1.	Protein-energy malnutrition		69.348	69.348	69.348		30.1254	39.2226		34.6405	25.2521	7.4855	0.983104	0.986748
			2.	Iodine deficiency		3.28155	3.28155	3.28155		1.36494	1.91661		2.31816	0.951222	0.0082195	0.00129473	0.00265318
			3.	Vitamin A deficiency		4.0173	4.0173	4.0173		1.89772	2.11958		1.68091	2.32682	0.0090544	0	0.000517979
			4.	Iron-deficiency anaemia		64.2185	64.2185	64.2185		20.1758	44.0426		2.49884	3.00377	49.9835	7.89214	0.84027
2002	II.	Noncommunicable diseases				6508.62	6508.62	6508.62		3414.05	3094.57		284.579	99.0891	1850.81	1585.77	2688.38
2002		A.	Malignant neoplasms			950.892	950.892	950.892		487.129	463.763		12.502	12.7913	314.545	279.485	331.568
2002			1.	Mouth and oropharynx cancers		144.193	144.193	144.193		95.9282	48.265		0.246549	0.296514	43.8616	50.1056	49.6831
2002			2.	Oesophagus cancer		82.4881	82.4881	82.4881		44.9911	37.497		0.051781	0.082893	23.5333	29.095	29.7252
2002			3.	Stomach cancer		46.6637	46.6637	46.6637		29.1378	17.5259		0.01595	0.0604547	14.1021	14.2651	18.2201
2002			4.	Colon and rectum cancers		36.0699	36.0699	36.0699		20.6874	15.3825		0.00737295	0.061748	11.5429	9.72221	14.7356
2002			5.	Liver cancer		28.0376	28.0376	28.0376		17.2539	10.7837		0.389056	0.34625	12.9441	6.96615	7.39197
2002			6.	Pancreas cancer		13.1367	13.1367	13.1367		7.67043	5.46623		1.7759e-06	5.893e-06	3.93982	4.05343	5.1434
2002			7.	Trachea, bronchus, lung cancers		132.526	132.526	132.526		108.6	23.9257		0.0105657	0.0611841	41.378	45.8723	45.2042
2002			8.	Melanoma and other skin cancers		2.80624	2.80624	2.80624		1.47053	1.33571		0.0401277	0.0721347	0.87531	0.733666	1.085
2002			9.	Breast cancer		77.9697	77.9697	77.9697		0.00176937	77.9679		0.00231857	0.00682109	33.5086	20.7298	23.7221
2002			10.	Cervix uteri cancer		85.574	85.574	85.574		0	85.574		0.000464745	0.0163305	37.0042	26.365	22.1879
2002			11.	Corpus uteri cancer		4.44156	4.44156	4.44156		0	4.44156		0.0123591	0.0180692	0.899076	1.13155	2.3805
2002			12.	Ovary cancer		21.3555	21.3555	21.3555		0	21.3555		0.0233353	0.192737	7.44052	5.78372	7.91522
2002			13.	Prostate cancer		21.4734	21.4734	21.4734		21.4734	0		0.00362725	0.00792878	1.15377	5.8329	14.4752
2002			14.	Bladder cancer		30.7526	30.7526	30.7526		16.324	14.4286		0.528142	0.206254	6.512	8.17739	15.3288
2002			15.	Lymphomas, multiple myeloma		83.7842	83.7842	83.7842		29.2491	54.5352		2.31448	4.51196	30.1078	19.2739	27.5762
2002			16.	Leukaemia		38.0084	38.0084	38.0084		21.867	16.1414		4.57339	4.76487	18.153	4.4881	6.02909
2002		B.	Other neoplasms			18.549	18.549	18.549		9.57219	8.97685		1.11035	1.06059	9.38515	2.50609	4.48687
2002		C.	Diabetes mellitus			201.004	201.004	201.004		107.024	93.9801		2.00635	1.48674	58.2089	55.6732	83.6286
2002		D.	Endocrine disorders			25.707	25.707	25.707		12.4482	13.2588		9.93479	1.33947	6.65959	3.09759	4.67555
2002		E.	Neuropsychiatric conditions			239.772	239.772	239.772		134.3	105.471		13.6278	10.5398	70.5913	10.6882	134.325
2002			1.	Unipolar depressive disorders		8.92791	8.92791	8.92791		4.33736	4.59055		0	0	7.15872	1.76743	0.00176482
2002			2.	Bipolar disorder		0.069867	0.069867	0.069867		0.0247758	0.0450911		0.00219718	0.0013873	0.0267482	0.0137164	0.0258179
2002			3.	Schizophrenia		13.2861	13.2861	13.2861		6.69101	6.59505		0.0177871	0.00207679	8.47202	1.77626	3.01792
2002			4.	Epilepsy		32.1208	32.1208	32.1208		14.7163	17.4045		12.4756	6.95027	9.43548	0.992813	2.2666
2002			5.	Alcohol use disorders		13.0018	13.0018	13.0018		11.9186	1.08328		0	8.65963e-05	9.25409	2.59137	1.15629
2002			6.	Alzheimer and other dementias		84.2222	84.2222	84.2222		42.5955	41.6267		0.0800416	0.0186878	0.142829	0.155285	83.8254
2002			7.	Parkinson disease		9.29296	9.29296	9.29296		5.25189	4.04108		0.0133542	0.00283047	0.033128	0.053894	9.18976
2002			8.	Multiple sclerosis		1.24276	1.24276	1.24276		0.739043	0.503718		0.0292513	0.0798521	0.607594	0.187436	0.338628
2002			9.	Drug use disorders		29.2455	29.2455	29.2455		24.2709	4.97453		0	0.000994286	28.2474	0.635044	0.362042
2002			10.	Post-traumatic stress disorder		0.00452784	0.00452784	0.00452784		0.00294768	0.00158016		0	0	0.0030856	0.000731921	0.000710315
2002			11.	Obsessive-compulsive disorder		0	0	0		0	0		0	0	0	0	0
2002			12.	Panic disorder		0	0	0		0	0		0	0	0	0	0
2002			13.	Insomnia (primary)		0	0	0		0	0		0	0	0	0	0
2002			14.	Migraine		0	0	0		0	0		0	0	0	0	0
2002		F.	Sense organ diseases			1.00871	1.00871	1.00871		0.464934	0.543772		0.0852617	0.0506433	0.308431	0.106168	0.458202
2002			1.	Glaucoma		0.0372865	0.0372865	0.0372865		0.034835	0.00245151		0.000700868	0	0.0190421	0.0175436	0
2002			2.	Cataracts		0	0	0		0	0		0	0	0	0	0
2002			3.	Vision disorders, age-related		0	0	0		0	0		0	0	0	0	0
2002			4.	Hearing loss, adult onset		0	0	0		0	0		0	0	0	0	0
2002		G.	Cardiovascular diseases			3521	3521	3521		1842.17	1678.83		38.4259	23.9492	840.96	942.617	1675.04
2002			1.	Rheumatic heart disease		129.742	129.742	129.742		62.2957	67.4466		12.073	6.94066	55.9215	21.1169	33.6902
2002			2.	Hypertensive heart disease		92.7746	92.7746	92.7746		48.2445	44.5301		0.675848	0.855908	27.5495	24.548	39.1454
2002			3.	Ischaemic heart disease		1891.6	1891.6	1891.6		1059.5	832.102		3.72159	4.06335	488.97	537.286	857.56
2002			4.	Cerebrovascular disease		952.459	952.459	952.459		479.514	472.945		4.52601	2.66482	152.931	272.159	520.178
2002			5.	Inflammatory heart diseases		72.2895	72.2895	72.2895		34.5468	37.7426		4.54389	1.78999	21.7605	14.1975	29.9976
2002		H.	Respiratory diseases			765.608	765.608	765.608		415.417	350.191		16.3523	8.66244	261.785	184.832	293.975
2002			1.	Chronic obstructive pulmonary disease		594.32	594.32	594.32		326.89	267.429		0.159156	0.0285363	180.511	164.095	249.527
2002			2.	Asthma		78.8446	78.8446	78.8446		39.2659	39.5786		0.486442	4.8856	59.7478	5.89939	7.82538
2002		I.	Digestive diseases			450.273	450.273	450.273		226.903	223.371		41.2429	28.3596	208.752	70.4435	101.476
2002			1.	Peptic ulcer disease		83.6974	83.6974	83.6974		51.0983	32.5991		3.61006	2.39345	43.5169	13.2755	20.9015
2002			2.	Cirrhosis of the liver		188.266	188.266	188.266		109.021	79.2454		19.5826	8.88061	90.2434	32.6033	36.9562
2002		J.	Genitourinary diseases			159.472	159.472	159.472		94.9688	64.5032		8.38728	4.98911	63.4532	32.7915	49.8509
2002			1.	Nephritis and nephrosis		134.429	134.429	134.429		75.8675	58.5613		7.50019	4.67792	53.7103	27.0577	41.4826
2002			2.	Benign prostatic hypertrophy		11.897	11.897	11.897		11.897	0		0	0	4.38984	2.89853	4.60861
2002		K.	Skin diseases			9.73072	9.73072	9.73072		4.82685	4.90388		0.852673	0.315737	2.66815	1.85947	4.03469
2002		L.	Musculoskeletal diseases			11.2602	11.2602	11.2602		5.42191	5.83832		1.21738	0.545336	3.70551	1.4105	4.3815
2002			1.	Rheumatoid arthritis		2.91815	2.91815	2.91815		1.04971	1.86845		0.0109598	0.0542024	0.99942	0.520116	1.33346
2002			2.	Osteoarthritis		0.0937068	0.0937068	0.0937068		0.0491959	0.0445109		0.00111717	0	0.0147076	0.0121826	0.0656994
2002		M.	Congenital anomalies			153.843	153.843	153.843		73.1471	80.6955		138.787	4.97264	9.57743	0.177161	0.328043
2002		N.	Oral conditions			0.508115	0.508115	0.508115		0.259823	0.248292		0.047245	0.0265132	0.210659	0.0811983	0.142499
2002	III.	Injuries				1331.76	1331.76	1331.76		759.262	572.494		76.2808	114.371	877.865	106.016	157.222
2002		A.	Unintentional injuries			1001.45	1001.45	1001.45		553.939	447.514		72.8519	105.097	602.493	88.3302	132.682
2002			1.	Road traffic accidents		240.149	240.149	240.149		177.758	62.3911		10.0477	21.857	169.99	17.0137	21.2403
2002			2.	Poisonings		91.6389	91.6389	91.6389		47.9806	43.6583		1.63877	6.84421	53.8141	19.1374	10.2044
2002			3.	Falls		114.073	114.073	114.073		67.8506	46.2223		7.79973	7.865	39.3996	14.5212	44.4873
2002			4.	Fires		182.772	182.772	182.772		51.9599	130.812		13.6964	13.6283	134.633	8.81511	11.9992
2002			5.	Drownings		90.4547	90.4547	90.4547		54.8678	35.5869		10.9329	20.5465	46.4925	4.91721	7.56567
2002			6.	Other unintentional injuries		282.366	282.366	282.366		153.522	128.844		28.7365	34.356	158.163	23.9255	37.1847
2002		B.	Intentional injuries			330.302	330.302	330.302		205.323	124.979		3.42887	9.27429	275.372	17.6863	24.5401
2002			1.	Self-inflicted injuries		226.001	226.001	226.001		130.988	95.0131		0.00145898	5.51005	197.291	9.3082	13.8902
2002			2.	Violence		79.8037	79.8037	79.8037		53.0705	26.7333		2.83637	3.05557	58.2064	6.52678	9.17859
2002			3.	War		18.2911	18.2911	18.2911		16.489	1.80206		0.0386901	0.238468	16.2762	1.10695	0.630746
2015	Population (millions)					1705.72	1711.64	1693.61		866.885	838.839		178.073	340.756	1048.13	83.2277	55.5404
2015		All Causes				14363.7	13460.1	15967.6		7777.07	6586.61		2254.28	322.007	4749.33	2388.39	4649.69
2015	I.	Communicable, maternal, perinatal and nutritional conditions				4322.47	3529.26	5554.2		2436.41	1886.06		1937.52	145.075	1378.97	273.728	587.169
2015		A.	Infectious and parasitic diseases			2258.58	1807.85	2958.92		1378.97	879.614		701.239	78.2739	1130.27	124.633	224.16
2015			1.	Tuberculosis		273.577	203.572	389.016		167.911	105.666		5.1696	5.14135	188.665	45.5816	29.0194
2015			2.	STDs excluding HIV		49.6498	38.2703	66.1007		27.3848	22.2651		20.5761	0.00668589	11.5721	7.48164	10.0133
2015			3.	HIV/AIDS		772.75	673.798	887.947		564.285	208.465		9.73476	9.03572	733.202	17.8161	2.96143
2015			4.	Diarrhoeal diseases		380.277	285.037	537.346		210.399	169.878		320.827	0.803367	12.2848	7.51724	38.8443
2015			5.	Childhood-cluster diseases		215.716	159.221	311.683		115.324	100.392		203.455	8.94326	2.62299	0.283396	0.411539
2015				a.	Pertussis	69.538	51.5425	101.193		37.2088	32.3292		69.538	0	0	0	0
2015				d.	Measles	94.2477	69.0629	136.144		50.5059	43.7418		86.5681	7.67959	0	0	0
2015				e.	Tetanus	50.4472	37.5119	72.1726		26.8661	23.5811		46.1906	1.02265	2.55218	0.27046	0.411345
2015			6.	Meningitis		43.8219	34.7323	61.2956		25.4828	18.3391		9.39301	8.02917	14.3153	3.43667	8.64782
2015			7.	Hepatitis B and C		30.3214	24.2433	40.8958		22.0521	8.26937		0.170777	0.346761	20.743	2.99974	6.06111
2015			8.	Malaria		7.18243	5.41428	10.4655		3.93755	3.24488		6.5798	0.0447044	0.284442	0.0700082	0.203475
2015			9.	Tropical-cluster diseases		22.6251	17.5366	33.014		13.9293	8.69585		2.0717	6.48309	11.9251	1.45318	0.692023
2015			10.	Leprosy		2.01593	1.59257	2.64732		1.36901	0.646917		0.265313	0.0397423	0.848325	0.250304	0.612245
2015			11.	Dengue		4.04845	3.11375	5.86877		2.08849	1.95996		0.714713	2.17192	0.600246	0.147487	0.414086
2015			12.	Japanese encephalitis		6.14142	4.76905	8.56402		3.37882	2.76261		1.45505	0.734851	3.28739	0.240443	0.423691
2015			13.	Trachoma		0.055484	0.0415112	0.0750231		0.055484	0		0.0225617	0	0.0329224	0	0
2015			14.	Intestinal nematode infections		2.05757	1.54093	3.06997		1.09699	0.960576		0.353582	1.50434	0.0769644	0.0152607	0.107423
2015		B.	Respiratory infections			996.338	785.215	1324.18		534.747	461.591		350.255	51.0239	106.356	141.011	347.692
2015		C.	Maternal conditions			98.2942	75.8178	146.402		0	98.2942		0	0	98.2942	0	0
2015		D.	Perinatal conditions			859.051	774.183	971.508		474.746	384.306		859.051	0	0	0	0
2015		E.	Nutritional deficiencies			110.206	86.1966	153.198		47.9545	62.252		26.9782	15.7767	44.0511	8.08378	15.3167
2015			1.	Protein-energy malnutrition		35.761	27.641	51.4768		17.1422	18.6187		17.4133	11.8069	5.13165	0.591785	0.817409
2015			2.	Iodine deficiency		1.8423	1.34398	2.55528		0.82161	1.02069		1.33557	0.499177	0.00484554	0.000771962	0.00193058
2015			3.	Vitamin A deficiency		2.15563	1.59599	3.02882		1.09532	1.06031		0.976892	1.17091	0.00732119	0	0.000510966
2015			4.	Iron-deficiency anaemia		41.8634	33.8674	57.8916		15.5918	26.2715		1.31697	1.41812	33.883	4.575	0.670287
2015	II.	Noncommunicable diseases				8389.44	8198.08	8775.7		4365.83	4023.62		239.451	73.3915	2285.38	1970.2	3821.02
2015		A.	Malignant neoplasms			1388.59	1321.05	1398.28		693.89	694.699		15.3886	15.0418	429.377	387.355	541.427
2015			1.	Mouth and oropharynx cancers		205.468	194.817	207.099		130.753	74.7153		0.314637	0.377035	58.3951	66.5886	79.7925
2015			2.	Oesophagus cancer		119.209	113.006	119.562		61.5994	57.6095		0.0650476	0.102026	32.1101	38.9633	47.9683
2015			3.	Stomach cancer		67.1058	63.7291	67.1324		40.2053	26.9005		0.0197197	0.0752354	18.4838	18.7094	29.8177
2015			4.	Colon and rectum cancers		53.557	49.8384	53.5464		29.4237	24.1333		0.00992861	0.0811809	15.0644	12.9589	25.4427
2015			5.	Liver cancer		38.1634	36.2301	38.7774		22.8529	15.3104		0.477872	0.397617	16.3788	9.25514	11.6539
2015			6.	Pancreas cancer		18.9953	17.7976	19.0219		10.5865	8.40881		2.38907e-06	8.14819e-06	5.20413	5.33933	8.45183
2015			7.	Trachea, bronchus, lung cancers		209.598	205.9	217.735		173.528	36.0699		0	0	66.3921	70.7907	72.4151
2015			8.	Melanoma and other skin cancers		4.08296	3.84736	4.09579		2.04913	2.03383		0.0525523	0.0910007	1.16361	1.01755	1.75825
2015			9.	Breast cancer		116.986	109.715	117.242		0.00138796	116.985		0.00274863	0.00745592	46.8239	29.941	40.211
2015			10.	Cervix uteri cancer		124.299	117.019	124.595		0	124.299		0.000555237	0.018192	50.5319	37.5458	36.2025
2015			11.	Corpus uteri cancer		6.91624	6.55425	6.86292		0	6.91624		0.0188076	0.0269287	1.24544	1.62398	4.00107
2015			12.	Ovary cancer		32.5095	29.7269	32.605		0	32.5095		0.0304812	0.23882	10.2842	8.44976	13.5062
2015			13.	Prostate cancer		32.462	30.5664	31.5684		32.462	0		0.00401139	0.00856823	1.49811	7.38771	23.5636
2015			14.	Bladder cancer		45.4534	43.3841	45.0715		24.1998	21.2536		0.624386	0.224364	8.54023	10.8924	25.172
2015			15.	Lymphomas, multiple myeloma		120.15	111.821	119.991		39.8094	80.3407		2.86922	5.34908	38.7722	26.3482	46.8114
2015			16.	Leukaemia		49.2347	47.2433	49.2765		27.383	21.8517		5.51591	5.54583	22.2129	5.93371	10.0264
2015		B.	Other neoplasms			25.7722	24.5932	25.8956		12.6899	13.0823		1.36903	1.26397	12.0772	3.45133	7.61071
2015		C.	Diabetes mellitus			301.593	293.693	309.336		158.26	143.333		1.70328	1.19718	89.0076	78.1305	131.554
2015		D.	Endocrine disorders			26.4349	25.3004	28.5567		13.0393	13.3956		6.95979	1.04094	7.88735	3.89706	6.64981
2015		E.	Neuropsychiatric conditions			301.837	301.046	309.785		168.355	133.482		10.5918	8.49592	84.3849	13.1234	185.241
2015			1.	Unipolar depressive disorders		11.1289	11.025	11.4911		5.34569	5.78321		0	0	8.96482	2.16146	0.00262617
2015			2.	Bipolar disorder		0.0872086	0.086281	0.0904506		0.0277003	0.0595084		0.00165272	0.000910769	0.0321504	0.0167804	0.0357143
2015			3.	Schizophrenia		16.9201	16.8647	17.3711		8.38408	8.53598		0.0131473	0.00192489	10.5837	2.17291	4.14842
2015			4.	Epilepsy		29.697	27.9414	32.6486		13.6047	16.0923		9.58783	5.53624	10.282	1.20803	3.08291
2015			5.	Alcohol use disorders		15.5792	15.5789	16.0255		14.17	1.40924		0	0.000101579	10.906	3.15983	1.51327
2015			6.	Alzheimer and other dementias		116.281	117.472	117.072		58.7064	57.5748		0.0632813	0.0160712	0.182637	0.196126	115.823
2015			7.	Parkinson disease		12.8203	12.9576	12.8827		7.23115	5.58919		0.0111648	0.00291446	0.0446579	0.0719005	12.6897
2015			8.	Multiple sclerosis		1.52407	1.51014	1.57218		0.893841	0.630231		0.0221881	0.064794	0.737035	0.231603	0.468452
2015			9.	Drug use disorders		35.5784	35.4887	36.942		29.5397	6.03864		0	0.00116632	34.2575	0.808341	0.511374
2015			10.	Post-traumatic stress disorder		0.00587351	0.00578848	0.00605815		0.00366189	0.00221162		0	0	0.00364724	0.000989044	0.00123722
2015			11.	Obsessive-compulsive disorder		0	0	0		0	0		0	0	0	0	0
2015			12.	Panic disorder		0	0	0		0	0		0	0	0	0	0
2015			13.	Insomnia (primary)		0	0	0		0	0		0	0	0	0	0
2015			14.	Migraine		0	0	0		0	0		0	0	0	0	0
2015		F.	Sense organ diseases			1.24151	1.227	1.28812		0.573887	0.667621		0.0639042	0.0401345	0.355563	0.13311	0.648797
2015			1.	Glaucoma		0.0436407	0.0436503	0.044649		0.0413493	0.00229141		0.000523602	0	0.0215713	0.0215458	0
2015			2.	Cataracts		0	0	0		0	0		0	0	0	0	0
2015			3.	Vision disorders, age-related		0	0	0		0	0		0	0	0	0	0
2015			4.	Hearing loss, adult onset		0	0	0		0	0		0	0	0	0	0
2015		G.	Cardiovascular diseases			4468.55	4429.75	4682.8		2283	2185.55		37.6148	15.0235	995.616	1110.31	2309.99
2015			1.	Rheumatic heart disease		146.555	143.344	157.798		71.46	75.0953		10.8689	4.05488	59.8509	24.886	46.8946
2015			2.	Hypertensive heart disease		119.045	116.93	124.995		60.7398	58.3051		0.707827	0.650103	32.911	29.6327	55.1432
2015			3.	Ischaemic heart disease		2380.53	2355.5	2510.69		1304.77	1075.76		3.57656	2.49136	586.365	630.214	1157.88
2015			4.	Cerebrovascular disease		1247.57	1243.11	1287.93		608.696	638.874		4.89944	2.00558	187.876	322.331	730.457
2015			5.	Inflammatory heart diseases		88.0473	87.0573	93.1341		41.276	46.7713		4.21868	1.06452	23.6934	16.7712	42.2995
2015		H.	Respiratory diseases			1086.56	1042.7	1154.82		606.675	479.888		14.2626	7.04726	370.444	254.699	440.11
2015			1.	Chronic obstructive pulmonary disease		874.818	842.073	929.852		494.737	380.081		0.1257	0.021588	269.773	228.05	376.848
2015			2.	Asthma		96.2923	90.3625	103.98		49.8113	46.481		0.425149	3.95432	73.3049	7.67837	10.9296
2015		I.	Digestive diseases			444.774	426.539	497.526		239.705	205.069		28.526	16.5841	207.778	74.4968	117.389
2015			1.	Peptic ulcer disease		89.0927	86.935	97.1986		56.5293	32.5633		2.63206	1.42886	45.498	14.5373	24.9964
2015			2.	Cirrhosis of the liver		183.048	175.511	206.17		112.165	70.8834		14.5203	5.52954	89.0954	33.0433	40.8599
2015		J.	Genitourinary diseases			188.827	186.373	197.572		113.962	74.865		5.58235	3.07057	71.6038	40.2808	68.2897
2015			1.	Nephritis and nephrosis		158.055	155.681	165.958		89.9236	68.1315		4.99193	2.8755	60.1543	33.2119	56.8215
2015			2.	Benign prostatic hypertrophy		15.4996	15.718	15.5177		15.4996	0		0	0	5.63656	3.56703	6.29605
2015		K.	Skin diseases			11.9165	11.7905	12.3128		5.85963	6.05691		0.61669	0.239244	3.21219	2.28672	5.56169
2015		L.	Musculoskeletal diseases			13.2738	13.0647	13.8467		6.28087	6.99292		0.882049	0.455732	4.2962	1.72585	5.91395
2015			1.	Rheumatoid arthritis		3.79162	3.76824	3.88996		1.36702	2.4246		0.00828049	0.0452985	1.26664	0.646066	1.82533
2015			2.	Osteoarthritis		0.141157	0.141044	0.141151		0.0742849	0.0668719		0.000777642	0	0.0211865	0.0170461	0.102146
2015		M.	Congenital anomalies			129.477	120.365	143.059		63.2323	66.2449		115.855	3.87083	9.09763	0.216557	0.437327
2015		N.	Oral conditions			0.592923	0.58026	0.62251		0.299249	0.293673		0.0352807	0.0203002	0.241008	0.0999001	0.196434
2015	III.	Injuries				1651.77	1732.74	1637.67		974.832	676.941		77.3045	103.541	1084.97	144.454	241.499
2015		A.	Unintentional injuries			1254.87	1316.68	1234.75		728.531	526.336		73.7254	95.0053	759.738	121.14	205.258
2015			1.	Road traffic accidents		405.185	452.444	342.254		305.95	99.235		14.2672	29.8012	295.888	27.6359	37.5927
2015			2.	Poisonings		110.096	114.169	113.572		57.0262	53.0701		1.5646	5.45378	62.4147	25.363	15.3002
2015			3.	Falls		146.381	148.529	147.026		85.6855	60.6958		7.5857	6.60125	46.4914	18.8755	66.8275
2015			4.	Fires		194.694	198.303	207.142		56.8485	137.845		12.8541	11.4219	140.413	11.7692	18.2356
2015			5.	Drownings		89.6251	89.5538	97.9004		55.5156	34.1095		10.4981	15.168	46.3248	6.38533	11.2488
2015			6.	Other unintentional injuries		308.886	313.682	326.852		167.506	141.38		26.9556	26.5592	168.207	31.1106	56.0535
2015		B.	Intentional injuries			396.906	416.055	402.919		246.301	150.605		3.5791	8.53567	325.237	23.314	36.2406
2015			1.	Self-inflicted injuries		266.704	280.868	272.284		154.118	112.587		0.00240406	4.94736	229.391	12.1164	20.2468
2015			2.	Violence		97.4188	105.37	97.9996		63.8062	33.6126		2.93749	2.83297	69.1606	8.73176	13.7559
2015			3.	War		25.2598	21.7781	25.121		22.6227	2.63707		0.0489596	0.310797	22.393	1.49678	1.01022
2030	Population (millions)					1974.42	2004.07	1927.77		981.501	992.917		167.71	345.655	1255.96	121.749	83.3466
2030		All Causes				16546.6	14827	18707.5		8810.29	7736.33		1354.86	224.975	5498.09	3110.61	6358.08
2030	I.	Communicable, maternal, perinatal and nutritional conditions				3567.38	2092.72	5124.53		2132.94	1434.44		1102.15	77.1936	1582.06	253.362	552.611
2030		A.	Infectious and parasitic diseases			2122.6	1163.11	2911.11		1351.21	771.397		323.652	46.0048	1421.51	121.771	209.67
2030			1.	Tuberculosis		125.973	59.6327	288.23		75.671	50.3018		2.03762	2.06695	83.869	22.557	15.4423
2030			2.	STDs excluding HIV		34.1013	19.1547	58.2121		21.3927	12.7086		9.72235	0.00260133	8.49001	6.09277	9.79356
2030			3.	HIV/AIDS		1279.35	713.344	1299.76		866.217	413.13		11.2957	16.053	1195.41	50.1339	6.45207
2030			4.	Diarrhoeal diseases		198.164	99.7355	388.322		116.177	81.987		144.384	0.355661	8.93136	6.05327	38.4402
2030			5.	Childhood-cluster diseases		97.8067	44.7235	208.916		56.6593	41.1474		91.4849	3.96422	1.71978	0.229336	0.408538
2030				a.	Pertussis	31.5077	14.3264	68.0052		18.2744	13.2333		31.5077	0	0	0	0
2030				d.	Measles	42.1802	19.0395	90.3386		24.5064	17.6739		38.7701	3.41011	0	0	0
2030				e.	Tetanus	23.4456	11.0412	49.123		13.4993	9.94635		20.6967	0.452944	1.66911	0.218456	0.40838
2030			6.	Meningitis		28.1413	16.3166	50.7989		18.2262	9.91505		4.16261	3.48074	9.28689	2.7812	8.42981
2030			7.	Hepatitis B and C		23.209	13.8947	39.6943		17.6166	5.59249		0.0754812	0.13781	14.6094	2.4356	5.95072
2030			8.	Malaria		3.32638	1.6089	7.02302		1.94892	1.37746		2.87645	0.0190843	0.177496	0.054654	0.198697
2030			9.	Tropical-cluster diseases		13.2586	7.23516	26.4607		8.8501	4.40851		0.963825	2.91201	7.55525	1.1672	0.660317
2030			10.	Leprosy		1.58948	0.945633	2.6047		1.1126	0.476882		0.130466	0.0184574	0.637774	0.201598	0.601182
2030			11.	Dengue		2.1307	1.16161	4.19067		1.19296	0.937739		0.304399	0.902526	0.390788	0.120754	0.412236
2030			12.	Japanese encephalitis		3.80109	2.11383	7.14337		2.41523	1.38587		0.664157	0.308345	2.2181	0.193515	0.416976
2030			13.	Trachoma		0.0373042	0.0199628	0.0681017		0.0373042	0		0.0122515	0	0.0250527	0	0
2030			14.	Intestinal nematode infections		1.00942	0.511695	2.13414		0.588212	0.42121		0.15076	0.688639	0.0511842	0.0121377	0.106702
2030		B.	Respiratory infections			717.985	423.051	1174.05		404.479	313.506		156.686	23.4952	81.9493	125.873	329.981
2030		C.	Maternal conditions			48.1939	24.7777	104.972		0	48.1939		0	0	48.1939	0	0
2030		D.	Perinatal conditions			610.013	443.639	806.997		344.319	265.695		610.013	0	0	0	0
2030		E.	Nutritional deficiencies			68.5863	38.1388	127.4		32.9379	35.6483		11.803	7.69357	30.4133	5.71743	12.959
2030			1.	Protein-energy malnutrition		17.7596	9.35075	36.2253		9.44093	8.31863		7.47859	5.69841	3.46434	0.423776	0.694447
2030			2.	Iodine deficiency		0.883535	0.413871	1.77338		0.438775	0.44476		0.613144	0.2661	0.002687	0.00046148	0.00114275
2030			3.	Vitamin A deficiency		1.06242	0.521557	2.12627		0.595055	0.467366		0.453487	0.602379	0.00622176	0	0.000333841
2030			4.	Iron-deficiency anaemia		28.1306	16.7106	51.7433		12.1114	16.0192		0.555966	0.693368	23.1169	3.1582	0.606176
2030	II.	Noncommunicable diseases				10977.4	10508	11653.5		5500.48	5476.95		179.83	54.6431	2660.75	2646.24	5435.96
2030		A.	Malignant neoplasms			1949.46	1764.09	1976.79		953.999	995.462		16.1999	16.2427	539.888	559.884	817.247
2030			1.	Mouth and oropharynx cancers		285.799	257.455	287.386		174.307	111.492		0.340738	0.430664	72.0027	93.0154	120.009
2030			2.	Oesophagus cancer		167.369	150.163	167.926		82.4425	84.9264		0.072239	0.111933	40.2997	54.7021	72.1829
2030			3.	Stomach cancer		91.9782	83.363	91.228		52.8744	39.1038		0.0213553	0.0848452	22.4144	25.6532	43.8044
2030			4.	Colon and rectum cancers		74.1001	63.971	74.2932		39.1348	34.9653		0.0116277	0.0972696	18.4014	17.7908	37.799
2030			5.	Liver cancer		50.2399	45.0935	51.5161		29.3823	20.8576		0.499867	0.417746	19.1513	12.8101	17.361
2030			6.	Pancreas cancer		25.8866	22.7058	26.0141		13.8842	12.0023		2.30465e-06	8.72787e-06	6.28841	7.27165	12.3265
2030			7.	Trachea, bronchus, lung cancers		323.324	318.716	338.575		266.537	56.787		0	0	98.7073	112.743	111.874
2030			8.	Melanoma and other skin cancers		5.65782	4.97719	5.72314		2.72791	2.92991		0.0575598	0.103093	1.40701	1.4382	2.65196
2030			9.	Breast cancer		167.32	142.846	173.453		0.00114069	167.318		0.00279702	0.00746377	59.6021	44.1751	63.5321
2030			10.	Cervix uteri cancer		172.786	149.277	179.467		0	172.786		0.000572637	0.0184124	60.3749	55.6379	56.7541
2030			11.	Corpus uteri cancer		10.3751	9.17579	10.3714		0	10.3751		0.0223372	0.0345966	1.5557	2.39724	6.36524
2030			12.	Ovary cancer		46.1363	37.0242	48.6549		0	46.1363		0.0335136	0.268262	12.5655	12.2187	21.0503
2030			13.	Prostate cancer		44.9163	40.9503	41.2532		44.9163	0		0.00381366	0.00834098	1.83254	9.74351	33.3281
2030			14.	Bladder cancer		63.8566	58.7127	62.0406		33.7491	30.1075		0.630942	0.22357	10.25	15.1333	37.6189
2030			15.	Lymphomas, multiple myeloma		161.645	137.73	164.954		51.3491	110.296		3.01816	5.78549	45.5744	37.2835	69.9834
2030			16.	Leukaemia		59.3656	54.005	59.8854		31.9801	27.3855		5.69642	5.92113	24.8212	8.19357	14.7333
2030		B.	Other neoplasms			33.6277	30.3545	34.058		15.7044	17.9233		1.43111	1.36989	14.4031	4.9205	11.5031
2030		C.	Diabetes mellitus			400.194	381.545	409.566		202.93	197.264		1.32529	0.940571	106.723	106.123	185.082
2030		D.	Endocrine disorders			28.9291	27.2318	31.9695		14.1059	14.8232		4.47908	0.773407	9.02405	5.22258	9.42997
2030		E.	Neuropsychiatric conditions			385.598	390.009	388.29		206.881	178.717		7.55266	6.60674	98.011	17.358	256.069
2030			1.	Unipolar depressive disorders		13.58	13.1142	14.5197		6.53338	7.04657		0	0	10.7082	2.86758	0.00417771
2030			2.	Bipolar disorder		0.112947	0.110725	0.118521		0.0310018	0.0819449		0.00113185	0.000607252	0.036656	0.0223141	0.0522375
2030			3.	Schizophrenia		21.382	21.1461	22.2508		10.3385	11.0436		0.0089515	0.00158193	12.6566	2.883	5.83188
2030			4.	Epilepsy		27.4012	24.2034	32.0351		12.4081	14.9931		6.79638	4.26302	10.4681	1.59971	4.27395
2030			5.	Alcohol use disorders		18.4945	18.5792	19.1049		16.6313	1.86323		0	0.00010338	12.3544	4.12081	2.01916
2030			6.	Alzheimer and other dementias		160.697	167.248	154.507		76.5062	84.1909		0.044868	0.0124933	0.222214	0.265692	160.152
2030			7.	Parkinson disease		17.6077	18.3656	16.842		9.43489	8.17278		0.0081434	0.00266172	0.0567885	0.10413	17.4359
2030			8.	Multiple sclerosis		1.86632	1.84628	1.92752		1.07593	0.790393		0.0154928	0.050854	0.847862	0.303738	0.648372
2030			9.	Drug use disorders		43.1702	42.9046	45.9616		36.0467	7.12357		0	0.00118699	41.3605	1.08349	0.725052
2030			10.	Post-traumatic stress disorder		0.00759257	0.00741482	0.0079415		0.00443601	0.00315656		0	0	0.00416977	0.00147641	0.00194639
2030			11.	Obsessive-compulsive disorder		0	0	0		0	0		0	0	0	0	0
2030			12.	Panic disorder		0	0	0		0	0		0	0	0	0	0
2030			13.	Insomnia (primary)		0	0	0		0	0		0	0	0	0	0
2030			14.	Migraine		0	0	0		0	0		0	0	0	0	0
2030		F.	Sense organ diseases			1.55685	1.54768	1.60155		0.701436	0.855416		0.0435402	0.0302014	0.391392	0.177269	0.914449
2030			1.	Glaucoma		0.0522738	0.0528356	0.0531495		0.0505259	0.0017479		0.000356163	0	0.0238184	0.0280992	0
2030			2.	Cataracts		0	0	0		0	0		0	0	0	0	0
2030			3.	Vision disorders, age-related		0	0	0		0	0		0	0	0	0	0
2030			4.	Hearing loss, adult onset		0	0	0		0	0		0	0	0	0	0
2030		G.	Cardiovascular diseases			5845.28	5753.22	6199.82		2793.79	3051.49		29.0063	9.30707	1112.43	1439.52	3255.02
2030			1.	Rheumatic heart disease		169.76	161.45	190.812		80.3092	89.4507		7.7934	2.34275	60.5503	32.3555	66.7179
2030			2.	Hypertensive heart disease		157.526	152.333	168.971		76.5003	81.0254		0.598632	0.478957	36.9503	39.2156	80.2822
2030			3.	Ischaemic heart disease		3080.19	3009.02	3312.29		1587.92	1492.27		2.82563	1.51509	663.25	813.243	1599.36
2030			4.	Cerebrovascular disease		1686.87	1686.42	1735.34		763.143	923.725		4.21056	1.42661	215.193	420.137	1045.9
2030			5.	Inflammatory heart diseases		110.776	108.405	119.513		48.478	62.2983		3.10241	0.627095	24.5681	21.7804	60.6983
2030		H.	Respiratory diseases			1528.39	1417.29	1678.43		857.289	671.1		11.3263	5.58945	487.945	371.75	651.779
2030			1.	Chronic obstructive pulmonary disease		1264.08	1176.49	1389.01		716.736	547.34		0.0931726	0.0156249	368.487	334.81	560.67
2030			2.	Asthma		116.635	102.908	133.564		62.591	54.0441		0.339241	3.12394	86.3582	10.8142	15.9996
2030		I.	Digestive diseases			441.52	399.869	536.003		251.608	189.912		15.9323	8.46527	196.732	82.375	138.015
2030			1.	Peptic ulcer disease		95.2864	89.6377	110.095		62.2841	33.0022		1.54622	0.747161	45.8598	16.7595	30.3738
2030			2.	Cirrhosis of the liver		177.096	159.086	219.413		114.873	62.2224		8.78213	3.02006	83.9543	34.6223	46.7168
2030		J.	Genitourinary diseases			231.19	228.191	242.665		138.531	92.6594		3.45588	1.86159	78.7175	53.1608	93.9946
2030			1.	Nephritis and nephrosis		192.863	189.43	203.859		108.355	84.5074		3.09223	1.7426	65.6624	43.8259	78.5397
2030			2.	Benign prostatic hypertrophy		19.7669	20.6786	19.0304		19.7669	0		0	0	6.86967	4.65929	8.23796
2030		K.	Skin diseases			15.1225	15.0032	15.5449		7.14986	7.97262		0.4118	0.17489	3.69153	3.04253	7.80172
2030		L.	Musculoskeletal diseases			16.2284	15.8829	16.9643		7.37426	8.85413		0.590804	0.366231	4.74888	2.28866	8.23381
2030			1.	Rheumatoid arthritis		5.07984	5.03557	5.23639		1.77779	3.30205		0.00576527	0.0363791	1.51642	0.879296	2.64198
2030			2.	Osteoarthritis		0.218385	0.224761	0.215308		0.114774	0.103612		0.000484616	0	0.0292357	0.0261498	0.162515
2030		M.	Congenital anomalies			99.6214	83.0439	121.062		50.0729	49.5484		88.0515	2.90019	7.7873	0.281825	0.600583
2030		N.	Oral conditions			0.705284	0.681776	0.749871		0.341694	0.36359		0.0239807	0.0149202	0.261787	0.134445	0.270151
2030	III.	Injuries				2001.81	2226.37	1929.47		1176.87	824.94		72.8777	93.1387	1255.28	211.007	369.508
2030		A.	Unintentional injuries			1546.67	1738.69	1465.03		898.571	648.099		69.5009	85.8789	896.924	177.495	316.872
2030			1.	Road traffic accidents		599.497	771.278	447.639		447.325	152.173		17.9416	35.4616	435.6	45.9008	64.5929
2030			2.	Poisonings		129.307	134.601	137.911		61.3611	67.9461		1.36985	4.26075	64.0228	36.4557	23.1982
2030			3.	Falls		188.672	196.934	183.501		103.661	85.0116		6.72593	5.4076	51.3525	26.2005	98.9859
2030			4.	Fires		203.341	205.884	225.825		58.534	144.807		11.0438	9.3284	137.377	17.2039	28.3883
2030			5.	Drownings		88.9575	87.4841	102.689		53.7139	35.2435		9.22313	11.1318	42.9956	8.78708	16.8198
2030			6.	Other unintentional injuries		336.895	342.513	367.466		173.976	162.919		23.1966	20.2887	165.576	42.947	84.887
2030		B.	Intentional injuries			455.141	487.678	464.435		278.3	176.841		3.37679	7.25976	358.356	33.5123	52.6362
2030			1.	Self-inflicted injuries		297.322	323.788	306.951		169.664	127.658		0.00295413	4.14501	246.524	17.1428	29.5074
2030			2.	Violence		114.159	129.709	114.845		71.1286	43.0306		2.75415	2.36007	76.2995	12.912	19.8335
2030			3.	War		34.8773	24.3223	33.9587		30.9857	3.89153		0.0524849	0.375067	30.8192	2.09425	1.53631

## Sheet: Sub-Saharan Africa
Deaths by cause, scenario, sex and age for the years 2002, 2015 and 2030
Source: Mathers CD, Loncar D (2006). Projections of global mortality and burden of disease from 2002 to 2030.
Sub-Saharan Africa
						Total deaths ('000)				Baseline deaths ('000)			Baseline projections ('000) by age group
Year		Cause				Baseline	Optimistic	Pessimistic		Male	Female		0-4	5-14	15-59	60-69	70+
2002	Population (millions)					683.33	683.33	683.33		339.224	344.106		115.416	185.984	349.695	20.4622	11.7733
2002		All Causes				11105.1	11105.1	11105.1		5663.8	5441.26		4540.06	589.967	4012.41	782.339	1180.27
2002	I.	Communicable, maternal, perinatal and nutritional conditions				7978.98	7978.98	7978.98		3935.59	4043.4		4332.36	417.346	2809.72	224.318	195.242
2002		A.	Infectious and parasitic diseases			5829.26	5829.26	5829.26		2898.24	2931.02		2843.92	277.786	2413.95	171.936	121.662
2002			1.	Tuberculosis		375.66	375.66	375.66		257.77	117.89		26.8709	15.1841	279.33	34.0632	20.2112
2002			2.	STDs excluding HIV		90.807	90.807	90.807		48.5564	42.2506		29.1368	0.00107989	55.4267	4.61888	1.62345
2002			3.	HIV/AIDS		2215.82	2215.82	2215.82		1016.26	1199.56		304.147	108.534	1753.03	45.8478	4.26191
2002			4.	Diarrhoeal diseases		793.372	793.372	793.372		406.528	386.843		721.96	2.02186	20.0993	12.3444	36.9463
2002			5.	Childhood-cluster diseases		568.529	568.529	568.529		284.608	283.921		531.308	33.9105	2.77897	0.265229	0.26575
2002				a.	Pertussis	141.845	141.845	141.845		70.9296	70.9154		141.845	0	0	0	0
2002				d.	Measles	333.675	333.675	333.675		167.058	166.618		302.08	31.5953	0	0	0
2002				e.	Tetanus	91.4828	91.4828	91.4828		45.7418	45.7409		85.8582	2.31476	2.77879	0.265229	0.26575
2002			6.	Meningitis		22.8481	22.8481	22.8481		11.6968	11.1512		8.21053	6.7246	6.70326	0.728517	0.481186
2002			7.	Hepatitis B and C		29.5313	29.5313	29.5313		17.2457	12.2856		7.73286	5.72315	13.1702	2.14003	0.76501
2002			8.	Malaria		858.286	858.286	858.286		426.193	432.092		773.722	10.7513	47.264	10.6426	15.9055
2002			9.	Tropical-cluster diseases		85.9453	85.9453	85.9453		53.4705	32.4748		4.46563	19.0429	47.6042	9.04178	5.79075
2002			10.	Leprosy		0.811886	0.811886	0.811886		0.500268	0.311617		2.45901e-05	0	0.410629	0.211293	0.189939
2002			11.	Dengue		0.147492	0.147492	0.147492		0.0560004	0.0914918		0.0263657	0.0943457	0.0162346	0.00351542	0.00703085
2002			12.	Japanese encephalitis		0	0	0		0	0		0	0	0	0	0
2002			13.	Trachoma		0	0	0		0	0		0	0	0	0	0
2002			14.	Intestinal nematode infections		3.72404	3.72404	3.72404		1.85783	1.86621		0.0488952	1.06257	1.55297	0.569398	0.490208
2002		B.	Respiratory infections			1180.59	1180.59	1180.59		624.813	555.774		797.901	131.494	144.98	42.7633	63.4485
2002		C.	Maternal conditions			241.093	241.093	241.093		0	241.093		0	3.36407e-05	241.093	0	0
2002		D.	Perinatal conditions			579.449	579.449	579.449		335.541	243.908		579.449	0	0	0	0
2002		E.	Nutritional deficiencies			148.592	148.592	148.592		76.9886	71.6039		111.083	8.06709	9.6923	9.61908	10.1311
			1.	Protein-energy malnutrition		107.265	107.265	107.265		58.4084	48.8566		81.1121	3.32423	5.45955	8.19368	9.17548
			2.	Iodine deficiency		2.71291	2.71291	2.71291		1.40766	1.30525		2.16895	0.212279	0.200133	0.0805592	0.0509924
			3.	Vitamin A deficiency		18.3678	18.3678	18.3678		8.45722	9.91055		14.2309	1.6582	1.61511	0.532276	0.331305
			4.	Iron-deficiency anaemia		18.5306	18.5306	18.5306		7.85684	10.6737		12.2137	2.76533	2.27789	0.752374	0.521315
2002	II.	Noncommunicable diseases				2341.51	2341.51	2341.51		1150.03	1191.48		119.565	35.9916	712.053	519.362	954.541
2002		A.	Malignant neoplasms			418.514	418.514	418.514		219.533	198.981		3.52424	5.98339	151.855	106.659	150.493
2002			1.	Mouth and oropharynx cancers		19.3574	19.3574	19.3574		13.1474	6.21002		0.0444918	0.0802919	7.15158	5.53457	6.54649
2002			2.	Oesophagus cancer		24.09	24.09	24.09		15.0211	9.06886		0.00284452	0.00509217	8.84553	7.13415	8.10234
2002			3.	Stomach cancer		33.9028	33.9028	33.9028		18.5106	15.3922		0.0257744	0.119116	12.667	8.62508	12.4658
2002			4.	Colon and rectum cancers		20.2455	20.2455	20.2455		11.3999	8.8457		0.00437902	0.0474361	7.50801	4.66434	8.02138
2002			5.	Liver cancer		47.015	47.015	47.015		31.7997	15.2153		0.186628	0.151027	23.332	11.6203	11.7251
2002			6.	Pancreas cancer		7.91648	7.91648	7.91648		3.73906	4.17742		0.000291499	0.00428083	3.13827	2.22595	2.54769
2002			7.	Trachea, bronchus, lung cancers		15.2466	15.2466	15.2466		11.1762	4.07036		0.0119897	0.0485176	6.03614	5.01646	4.13349
2002			8.	Melanoma and other skin cancers		8.49205	8.49205	8.49205		3.75838	4.73367		0.00670573	0.0209884	2.52099	2.36096	3.58241
2002			9.	Breast cancer		35.2869	35.2869	35.2869		0.0497595	35.2371		0.0065629	0.0428292	15.7163	8.77143	10.7498
2002			10.	Cervix uteri cancer		38.4601	38.4601	38.4601		0	38.4601		0.000242726	0.0149622	16.0466	10.692	11.7063
2002			11.	Corpus uteri cancer		2.73485	2.73485	2.73485		0	2.73485		0.00186016	0.00473111	0.731536	0.652726	1.344
2002			12.	Ovary cancer		8.94397	8.94397	8.94397		0	8.94397		0.00551158	0.0858154	4.05336	2.2312	2.56808
2002			13.	Prostate cancer		41.0021	41.0021	41.0021		41.0021	0		0.00625077	0.015274	2.96621	10.767	27.2473
2002			14.	Bladder cancer		10.5063	10.5063	10.5063		7.37341	3.13293		0.0114182	0.0149572	2.38846	2.87631	5.2152
2002			15.	Lymphomas, multiple myeloma		34.6733	34.6733	34.6733		21.8947	12.7785		1.13036	3.39414	13.8643	6.59344	9.69102
2002			16.	Leukaemia		13.856	13.856	13.856		7.37777	6.47822		0.443696	0.799072	6.23745	2.48183	3.89392
2002		B.	Other neoplasms			10.158	10.158	10.158		4.948	5.21004		0.707599	1.01638	4.10364	1.95478	2.37565
2002		C.	Diabetes mellitus			84.138	84.138	84.138		30.6387	53.4993		0.156932	0.297232	26.7739	24.3371	32.5728
2002		D.	Endocrine disorders			28.4291	28.4291	28.4291		12.4535	15.9756		7.27839	0.955686	9.88958	4.3952	5.91029
2002		E.	Neuropsychiatric conditions			94.6249	94.6249	94.6249		56.6562	37.9688		14.8801	8.52177	44.0263	9.835	17.3617
2002			1.	Unipolar depressive disorders		0.00131602	0.00131602	0.00131602		0.000848019	0.000468006		0	0	0.00131602	0	0
2002			2.	Bipolar disorder		0	0	0		0	0		0	0	0	0	0
2002			3.	Schizophrenia		0.00778395	0.00778395	0.00778395		0.00395028	0.00383367		0	0.00161455	0.00258708	0.00254339	0.00103893
2002			4.	Epilepsy		39.0081	39.0081	39.0081		23.9446	15.0635		4.34437	3.67815	23.3855	3.63075	3.96931
2002			5.	Alcohol use disorders		6.88461	6.88461	6.88461		4.92852	1.95609		0	0	4.88859	0.906261	1.08976
2002			6.	Alzheimer and other dementias		6.87826	6.87826	6.87826		3.61636	3.2619		0.340383	0.0501004	0.734008	1.05842	4.69535
2002			7.	Parkinson disease		4.97241	4.97241	4.97241		2.86741	2.105		0.00291775	0.000469644	0.184692	0.954763	3.82957
2002			8.	Multiple sclerosis		0.353642	0.353642	0.353642		0.118098	0.235544		0	0.045751	0.174228	0.0796893	0.0539743
2002			9.	Drug use disorders		3.80739	3.80739	3.80739		3.10501	0.702382		0	0	3.70114	0.067675	0.0385823
2002			10.	Post-traumatic stress disorder		0	0	0		0	0		0	0	0	0	0
2002			11.	Obsessive-compulsive disorder		0	0	0		0	0		0	0	0	0	0
2002			12.	Panic disorder		0	0	0		0	0		0	0	0	0	0
2002			13.	Insomnia (primary)		0	0	0		0	0		0	0	0	0	0
2002			14.	Migraine		0	0	0		0	0		0	0	0	0	0
2002		F.	Sense organ diseases			0.16078	0.16078	0.16078		0.0835137	0.0772663		0.00526605	0.00300095	0.00451722	0.0219519	0.126044
2002			1.	Glaucoma		0.000319081	0.000319081	0.000319081		0.000319081	0		0	0	0.000319081	0	0
2002			2.	Cataracts		0	0	0		0	0		0	0	0	0	0
2002			3.	Vision disorders, age-related		0	0	0		0	0		0	0	0	0	0
2002			4.	Hearing loss, adult onset		0	0	0		0	0		0	0	0	0	0
2002		G.	Cardiovascular diseases			1077.47	1077.47	1077.47		481.838	595.636		9.06754	7.17046	275.241	250.703	535.293
2002			1.	Rheumatic heart disease		19.4437	19.4437	19.4437		6.39902	13.0447		0.833996	2.46661	12.136	1.75252	2.25452
2002			2.	Hypertensive heart disease		67.9187	67.9187	67.9187		24.4519	43.4668		0.0772039	0.1161	16.9682	16.6294	34.1278
2002			3.	Ischaemic heart disease		351.987	351.987	351.987		183.911	168.076		0.121733	0.205124	78.6986	100.183	172.779
2002			4.	Cerebrovascular disease		364.403	364.403	364.403		149.049	215.354		0.727912	1.69006	92.1891	90.2201	179.576
2002			5.	Inflammatory heart diseases		44.1184	44.1184	44.1184		22.3985	21.7199		3.87175	1.24871	17.5264	7.54938	13.9222
2002		H.	Respiratory diseases			259.648	259.648	259.648		152.7	106.948		16.2827	2.93419	74.4933	57.9413	107.996
2002			1.	Chronic obstructive pulmonary disease		118.939	118.939	118.939		75.87	43.0687		0.858638	0.0940318	24.9797	30.2797	62.7266
2002			2.	Asthma		26.5282	26.5282	26.5282		13.7264	12.8018		0.83457	0.458922	10.1351	6.14641	8.95311
2002		I.	Digestive diseases			167.894	167.894	167.894		97.4041	70.4904		4.46643	3.85915	82.1273	33.8195	43.6221
2002			1.	Peptic ulcer disease		15.6004	15.6004	15.6004		8.5922	7.00817		0.00221368	0.0598831	7.42003	2.95122	5.16702
2002			2.	Cirrhosis of the liver		60.7506	60.7506	60.7506		38.6707	22.08		0.29044	0.300434	29.8153	14.9921	15.3523
2002		J.	Genitourinary diseases			110.117	110.117	110.117		49.7969	60.3203		4.23628	1.96328	31.4909	24.7009	47.7259
2002			1.	Nephritis and nephrosis		103.721	103.721	103.721		45.7993	57.9215		3.82668	1.9148	30.7031	23.7178	43.5584
2002			2.	Benign prostatic hypertrophy		2.27123	2.27123	2.27123		2.27123	0		0	0	0.1148	0.388139	1.76829
2002		K.	Skin diseases			20.1875	20.1875	20.1875		6.50771	13.6798		0.230749	0.159667	6.91125	4.08846	8.79739
2002		L.	Musculoskeletal diseases			6.76526	6.76526	6.76526		2.63182	4.13344		0.00466445	0.415715	3.35632	0.846881	2.14168
2002			1.	Rheumatoid arthritis		1.08377	1.08377	1.08377		0.264056	0.819718		0	0.000862015	0.332086	0.249455	0.501371
2002			2.	Osteoarthritis		0.00988231	0.00988231	0.00988231		0.00268843	0.00719388		0	0	0.00214135	0.00158725	0.0061537
2002		M.	Congenital anomalies			63.39	63.39	63.39		34.8356	28.5544		58.7216	2.71121	1.77717	0.0573873	0.122615
2002		N.	Oral conditions			0.0111697	0.0111697	0.0111697		0.00545722	0.00571246		0.00221368	0.000469644	0.00339115	0.00223671	0.00285849
2002	III.	Injuries				784.56	784.56	784.56		578.18	206.38		88.1407	136.629	490.641	38.6588	30.49
2002		A.	Unintentional injuries			502.64	502.64	502.64		345.208	157.432		82.5226	124.207	249.464	24.8663	21.5799
2002			1.	Road traffic accidents		203.067	203.067	203.067		139.135	63.9319		18.5835	66.3143	99.6254	11.0017	7.54196
2002			2.	Poisonings		38.0937	38.0937	38.0937		23.316	14.7776		6.724	6.43584	20.7988	2.77342	1.36161
2002			3.	Falls		20.0778	20.0778	20.0778		13.7957	6.28214		1.79311	5.33579	7.1919	2.07722	3.67977
2002			4.	Fires		44.6353	44.6353	44.6353		24.3088	20.3265		18.1885	15.2936	7.79998	1.35392	1.99926
2002			5.	Drownings		66.8554	66.8554	66.8554		51.1589	15.6965		11.3674	14.6494	38.734	1.95484	0.149779
2002			6.	Other unintentional injuries		129.911	129.911	129.911		93.4938	36.4172		25.8662	16.1785	75.3136	5.70524	6.84754
2002		B.	Intentional injuries			281.92	281.92	281.92		232.972	48.9483		5.61807	12.4219	241.177	13.7925	8.91004
2002			1.	Self-inflicted injuries		36.665	36.665	36.665		28.3423	8.32278		0.00128777	2.08011	29.4912	2.73587	2.35657
2002			2.	Violence		143.5	143.5	143.5		112.91	30.5897		5.3747	8.99925	121.192	4.89409	3.0405
2002			3.	War		101.634	101.634	101.634		91.6209	10.0131		0.214981	1.32504	90.4385	6.15077	3.50473
2015	Population (millions)					916.858	928.519	902.924		455.282	461.576		139.991	237.086	496.616	26.5733	16.5918
2015		All Causes				12551	10763.2	13821.8		6484.54	6066.5		4207.23	602.286	5041.71	1006.62	1693.19
2015	I.	Communicable, maternal, perinatal and nutritional conditions				8216.86	6509.67	9427.53		4061.58	4155.28		3962.43	378.386	3377.68	264.23	234.135
2015		A.	Infectious and parasitic diseases			6047.6	4799.49	6916.4		2999.6	3048		2448.82	255.469	2980.78	211.975	150.556
2015			1.	Tuberculosis		388.868	298.588	455.175		263.259	125.609		24.2011	14.5803	296.576	31.9653	21.5459
2015			2.	STDs excluding HIV		87.5101	63.8681	109.484		47.3325	40.1777		25.1809	0.000880853	56.1714	4.40666	1.75026
2015			3.	HIV/AIDS		2595.69	2283.06	2786.58		1175.68	1420.01		80.7603	110.685	2297.38	91.531	15.3398
2015			4.	Diarrhoeal diseases		757.083	554.712	897.659		392.882	364.201		676.835	1.73058	20.9631	12.0641	45.49
2015			5.	Childhood-cluster diseases		529.275	379.284	626.533		268.15	261.126		495.961	29.7327	2.99433	0.267591	0.319491
2015				a.	Pertussis	132.045	95.871	155.901		66.7585	65.2863		132.045	0	0	0	0
2015				d.	Measles	308.834	219.786	366.074		156.551	152.283		281.152	27.6821	0	0	0
2015				e.	Tetanus	86.9446	62.566	102.846		43.9953	42.9493		81.3131	2.05028	2.99414	0.267591	0.319491
2015			6.	Meningitis		21.2947	14.7815	26.7766		11.198	10.0967		7.50647	5.73148	6.80405	0.706557	0.546188
2015			7.	Hepatitis B and C		28.3202	20.0351	35.4161		16.9322	11.388		7.05858	4.86804	13.5376	2.0176	0.838318
2015			8.	Malaria		798.66	579.979	949.914		402.403	396.256		711.054	9.19724	49.1496	10.4069	18.8517
2015			9.	Tropical-cluster diseases		83.4353	59.0101	105.18		52.82	30.6153		3.98143	15.6438	48.5774	8.78337	6.44938
2015			10.	Leprosy		0.800549	0.59438	0.945751		0.497328	0.303221		2.66949e-05	0	0.401193	0.198416	0.200913
2015			11.	Dengue		0.131215	0.0881298	0.172192		0.0512919	0.0799228		0.024185	0.0789837	0.0160864	0.00332608	0.00863343
2015			12.	Japanese encephalitis		0	0	0		0	0		0	0	0	0	0
2015			13.	Trachoma		0	0	0		0	0		0	0	0	0	0
2015			14.	Intestinal nematode infections		3.58095	2.55676	4.56398		1.883	1.69794		0.0358963	0.846694	1.56138	0.545171	0.591802
2015		B.	Respiratory infections			1133.42	831.827	1356.97		605.539	527.886		743.963	115.59	157.899	43.4099	72.563
2015		C.	Maternal conditions			229.322	144.184	305.652		0	229.322		0	3.04137e-05	229.322	0	0
2015		D.	Perinatal conditions			669.455	636.258	681.062		384.38	285.075		669.455	0	0	0	0
2015		E.	Nutritional deficiencies			137.056	97.9055	167.448		72.0595	64.9969		100.186	7.32657	9.68326	8.84463	11.0161
2015			1.	Protein-energy malnutrition		98.9244	70.7761	120.67		54.6929	44.2315		72.9468	2.91453	5.46844	7.56681	10.0279
2015			2.	Iodine deficiency		2.39422	1.75761	3.02706		1.24737	1.14686		1.89627	0.182261	0.192423	0.0703515	0.0529168
2015			3.	Vitamin A deficiency		17.044	12.0868	20.7035		7.94302	9.10102		13.1176	1.49934	1.61261	0.47591	0.338595
2015			4.	Iron-deficiency anaemia		17.1117	12.1689	21.1329		7.38512	9.7266		10.9815	2.63671	2.2746	0.677689	0.541272
2015	II.	Noncommunicable diseases				3235.15	3148.76	3320.49		1600.96	1634.19		132.72	40.5512	955.529	691.68	1414.67
2015		A.	Malignant neoplasms			620.313	611.126	617.965		324.684	295.63		4.99096	8.16086	214.251	150.684	242.226
2015			1.	Mouth and oropharynx cancers		28.7232	27.9419	28.7604		19.1599	9.56335		0.0672042	0.113781	9.9921	7.68955	10.8606
2015			2.	Oesophagus cancer		33.3265	32.6267	33.5014		20.4578	12.8687		0.00340033	0.00497802	11.4478	9.71838	12.1519
2015			3.	Stomach cancer		49.8088	49.2297	49.6211		26.867	22.9419		0.0357042	0.164846	17.8069	11.9099	19.8916
2015			4.	Colon and rectum cancers		31.4707	30.4907	31.0969		18.0668	13.4039		0.00624278	0.0666006	10.6539	6.76907	13.9749
2015			5.	Liver cancer		68.2229	66.725	69.5941		45.7133	22.5095		0.267428	0.211451	33.4363	15.8867	18.421
2015			6.	Pancreas cancer		11.7056	11.4781	11.4609		5.44338	6.26225		0.000376939	0.00428509	4.3523	3.14139	4.20727
2015			7.	Trachea, bronchus, lung cancers		23.7162	23.391	28.0764		17.6879	6.02827		0	0	8.74075	7.75215	7.22328
2015			8.	Melanoma and other skin cancers		12.6707	12.464	12.3833		5.34914	7.32161		0.00921394	0.0257833	3.55398	3.43013	5.65163
2015			9.	Breast cancer		52.3863	52.0222	50.0526		0.0725964	52.3137		0.00888838	0.0575186	22.5053	13.014	16.8007
2015			10.	Cervix uteri cancer		56.3478	55.9818	53.5755		0	56.3478		0.000355453	0.0204848	22.5116	15.7592	18.0562
2015			11.	Corpus uteri cancer		3.98495	3.93974	3.83144		0	3.98495		0.00302369	0.00704327	0.998086	0.932845	2.04395
2015			12.	Ovary cancer		14.1656	13.8199	12.904		0	14.1656		0.00793388	0.118898	6.11674	3.62748	4.29455
2015			13.	Prostate cancer		62.1038	61.6356	62.9712		62.1038	0		0.00861292	0.0203583	3.86971	14.1751	44.0301
2015			14.	Bladder cancer		15.6517	15.4722	15.6083		11.1275	4.5242		0.0167179	0.0212376	3.28695	3.91773	8.40905
2015			15.	Lymphomas, multiple myeloma		51.6853	50.9064	51.4466		32.6207	19.0646		1.65472	4.7702	19.8182	9.16734	16.2749
2015			16.	Leukaemia		20.3831	20.14	20.0718		10.8858	9.49728		0.626413	1.04652	8.72886	3.48914	6.49215
2015		B.	Other neoplasms			14.8355	14.7276	14.5101		7.12622	7.7093		1.03625	1.4005	5.85299	2.7835	3.76228
2015		C.	Diabetes mellitus			133.916	130.167	134.86		47.2074	86.7087		0.172973	0.329249	44.5107	36.3277	52.5754
2015		D.	Endocrine disorders			35.2685	33.1624	36.7275		15.6182	19.6503		7.30596	1.03693	12.9291	5.68863	8.30783
2015		E.	Neuropsychiatric conditions			120.306	114.178	124.478		72.8905	47.4155		15.7827	9.47423	58.0247	12.4611	24.5632
2015			1.	Unipolar depressive disorders		0.00175847	0.00165212	0.00184379		0.00115192	0.000606551		0	0	0.00175847	0	0
2015			2.	Bipolar disorder		0	0	0		0	0		0	0	0	0	0
2015			3.	Schizophrenia		0.00999637	0.00954178	0.0103847		0.00463903	0.00535733		0	0.00186858	0.00347051	0.0035427	0.00111458
2015			4.	Epilepsy		49.5993	46.7085	51.578		30.8534	18.7459		4.61178	4.08733	30.7452	4.56763	5.58726
2015			5.	Alcohol use disorders		9.14137	8.96842	9.26303		6.55866	2.58271		0	0	6.54057	1.14147	1.45932
2015			6.	Alzheimer and other dementias		9.47813	9.43911	9.53611		5.1236	4.35452		0.361286	0.0555644	0.959214	1.34669	6.75537
2015			7.	Parkinson disease		6.95428	7.00946	6.94203		4.07055	2.88373		0.0029417	0.000560237	0.232338	1.2054	5.51304
2015			8.	Multiple sclerosis		0.456836	0.440093	0.463992		0.149065	0.307771		0	0.0514427	0.22778	0.10393	0.0736829
2015			9.	Drug use disorders		5.15519	4.95209	5.31232		4.20174	0.953453		0	0	5.01523	0.0860405	0.0539229
2015			10.	Post-traumatic stress disorder		0	0	0		0	0		0	0	0	0	0
2015			11.	Obsessive-compulsive disorder		0	0	0		0	0		0	0	0	0	0
2015			12.	Panic disorder		0	0	0		0	0		0	0	0	0	0
2015			13.	Insomnia (primary)		0	0	0		0	0		0	0	0	0	0
2015			14.	Migraine		0	0	0		0	0		0	0	0	0	0
2015		F.	Sense organ diseases			0.238106	0.237154	0.24042		0.127068	0.111037		0.00519638	0.00335814	0.00555619	0.0298365	0.194159
2015			1.	Glaucoma		0.000291879	0.000285443	0.000313143		0.000291879	0		0	0	0.000291879	0	0
2015			2.	Cataracts		0	0	0		0	0		0	0	0	0	0
2015			3.	Vision disorders, age-related		0	0	0		0	0		0	0	0	0	0
2015			4.	Hearing loss, adult onset		0	0	0		0	0		0	0	0	0	0
2015		G.	Cardiovascular diseases			1495.38	1476.89	1533.78		681.454	813.927		11.2904	7.14879	361.936	328.097	786.909
2015			1.	Rheumatic heart disease		25.3427	23.2719	26.6377		8.51028	16.8324		1.08196	2.448	16.1941	2.32009	3.29858
2015			2.	Hypertensive heart disease		94.0642	93.1378	96.1511		34.6779	59.3863		0.0888581	0.12605	21.9319	21.8755	50.0419
2015			3.	Ischaemic heart disease		487.07	480.568	504.424		256.64	230.43		0.139058	0.200679	103.291	131.384	252.056
2015			4.	Cerebrovascular disease		503.129	499.113	512.549		209.248	293.88		0.83214	1.78394	121.284	117.781	261.447
2015			5.	Inflammatory heart diseases		59.9763	58.1384	62.0799		31.0198	28.9565		5.00243	1.21732	23.2197	9.85321	20.6836
2015		H.	Respiratory diseases			359.694	347.884	381.731		215.788	143.906		18.1433	3.32026	102.082	77.3902	158.758
2015			1.	Chronic obstructive pulmonary disease		173.328	169.594	190.217		113.196	60.1315		0.956802	0.10687	35.778	41.8498	94.636
2015			2.	Asthma		35.3448	34.1331	36.2006		18.6868	16.658		0.936637	0.501459	13.0415	7.92913	12.9361
2015		I.	Digestive diseases			204.311	180.688	217.9		118.726	85.5855		5.30503	4.18624	100.37	40.0869	54.363
2015			1.	Peptic ulcer disease		19.3214	17.3026	20.5519		10.8163	8.50501		0.00243335	0.0623701	9.00654	3.51504	6.73498
2015			2.	Cirrhosis of the liver		72.3719	63.4549	77.8527		45.7066	26.6654		0.34312	0.335711	35.5694	17.4118	18.7119
2015		J.	Genitourinary diseases			144.321	140.049	147.251		66.3412	77.9794		4.15144	1.88611	39.5133	31.592	67.1778
2015			1.	Nephritis and nephrosis		135.588	131.399	138.435		60.7296	74.8588		3.74786	1.83949	38.533	30.3537	61.1144
2015			2.	Benign prostatic hypertrophy		3.3417	3.41414	3.27531		3.3417	0		0	0	0.145024	0.482755	2.71392
2015		K.	Skin diseases			27.855	27.4027	28.254		9.27264	18.5824		0.228994	0.175781	9.37577	5.36416	12.7103
2015		L.	Musculoskeletal diseases			8.9814	8.63559	9.16551		3.5547	5.42671		0.00452752	0.487563	4.43794	1.09526	2.95611
2015			1.	Rheumatoid arthritis		1.44632	1.41711	1.46843		0.358424	1.0879		0	0.00101962	0.459126	0.322134	0.664045
2015			2.	Osteoarthritis		0.0141916	0.0140943	0.0143263		0.00410665	0.010085		0	0	0.00304715	0.00220344	0.00894105
2015		M.	Congenital anomalies			69.717	63.6029	73.606		38.1658	31.5513		64.2998	2.94079	2.23486	0.076427	0.165147
2015		N.	Oral conditions			0.0136908	0.0130145	0.0142522		0.00622403	0.00746681		0.00218365	0.000549525	0.00393283	0.00307669	0.00394815
2015	III.	Injuries				1099.03	1104.74	1073.78		821.998	277.032		112.078	183.35	708.501	50.7143	44.3867
2015		A.	Unintentional injuries			712.583	738.401	681.752		501.236	211.347		105.271	167.955	374.785	33.2863	31.286
2015			1.	Road traffic accidents		321.371	356.533	280.869		226.571	94.8001		26.6559	101.346	166.673	15.3742	11.3216
2015			2.	Poisonings		51.5187	50.7765	52.066		32.2064	19.3123		8.41966	7.81112	29.7384	3.64682	1.90269
2015			3.	Falls		26.3036	26.0685	26.5124		18.207	8.09654		2.19439	6.30167	9.85931	2.66413	5.28405
2015			4.	Fires		55.7375	54.5714	56.9418		30.4101	25.3274		22.3307	18.3289	10.4724	1.75157	2.85379
2015			5.	Drownings		87.7163	85.4336	89.8719		68.8851	18.8313		13.9382	16.4454	54.5732	2.50557	0.253918
2015			6.	Other unintentional injuries		169.936	165.018	175.491		124.957	44.9791		31.7324	17.7215	103.468	7.34403	9.67003
2015		B.	Intentional injuries			386.447	366.34	392.023		320.762	65.6852		6.80714	15.3952	333.716	17.4279	13.1007
2015			1.	Self-inflicted injuries		48.9868	49.1836	49.4485		37.8375	11.1492		0.00151057	2.6021	39.596	3.43593	3.35121
2015			2.	Violence		187.796	187.523	194.295		147.771	40.0249		6.48746	10.8794	159.892	6.2211	4.31521
2015			3.	War		149.51	129.477	148.123		135.028	14.4812		0.286287	1.89103	134.156	7.75511	5.42165
2030	Population (millions)					1209.89	1275.45	1158.09		599.447	610.441		155.42	285.818	710.839	35.4828	22.3283
2030		All Causes				14608.4	10895.8	16722.9		7605.25	7003.16		3530.06	591.346	6949.05	1318.84	2219.11
2030	I.	Communicable, maternal, perinatal and nutritional conditions				8596.87	4873.01	10666.3		4238.1	4358.77		3265.64	309.133	4448.95	327.813	245.33
2030		A.	Infectious and parasitic diseases			6638.48	3642.75	8035.66		3260.72	3377.76		1915.87	219.365	4068.47	276.415	158.359
2030			1.	Tuberculosis		362.594	172.045	533.866		245.289	117.305		17.2411	11.4202	288.502	27.3639	18.0667
2030			2.	STDs excluding HIV		84.3484	43.9474	130.738		48.4197	35.9287		18.8464	0.000561043	59.4316	4.21929	1.8506
2030			3.	HIV/AIDS		3766.6	2204.94	3805.53		1686.88	2079.72		84.1428	117.645	3380.2	164.593	20.0207
2030			4.	Diarrhoeal diseases		611.852	312.764	879.319		326.173	285.679		527.31	1.21471	22.6874	11.6675	48.9723
2030			5.	Childhood-cluster diseases		405.146	197.878	591.21		210.992	194.154		381.069	20.5384	2.93221	0.261998	0.343764
2030				a.	Pertussis	101.902	50.633	147.464		52.969	48.9332		101.902	0	0	0	0
2030				d.	Measles	233.136	112.84	341.34		121.518	111.618		214.018	19.1182	0	0	0
2030				e.	Tetanus	68.9697	33.8326	100.769		35.8256	33.144		64.0118	1.42006	2.93206	0.261998	0.343764
2030			6.	Meningitis		17.9549	8.54214	28.5538		10.0028	7.95212		5.86815	4.06591	6.80412	0.641744	0.574967
2030			7.	Hepatitis B and C		25.5989	12.7775	40.1115		16.1241	9.47483		5.40231	3.52028	13.9367	1.88684	0.852766
2030			8.	Malaria		629.268	316.764	917.185		326.666	302.602		542.447	6.34224	49.9395	10.1733	20.366
2030			9.	Tropical-cluster diseases		79.4395	40.4041	124.15		51.4873	27.9521		2.99473	10.8221	50.1946	8.57391	6.85409
2030			10.	Leprosy		0.855347	0.483263	1.19252		0.578965	0.276381		2.36004e-05	0	0.485297	0.17152	0.198506
2030			11.	Dengue		0.101535	0.0463654	0.172358		0.0417612	0.0597736		0.0184742	0.0546437	0.0160786	0.00313162	0.0092067
2030			12.	Japanese encephalitis		0	0	0		0	0		0	0	0	0	0
2030			13.	Trachoma		0	0	0		0	0		0	0	0	0	0
2030			14.	Intestinal nematode infections		3.39407	1.74503	5.29384		1.88929	1.50478		0.0226121	0.606225	1.60331	0.532889	0.629033
2030		B.	Respiratory infections			959.73	504.262	1385.89		519.593	440.137		581.575	84.1501	174.409	43.3258	76.2701
2030		C.	Maternal conditions			195.57	76.0689	355.515		0	195.57		0	1.74937e-05	195.57	0	0
2030		D.	Perinatal conditions			692.704	596.28	723.163		397.718	294.986		692.704	0	0	0	0
2030		E.	Nutritional deficiencies			110.387	53.6461	166.078		60.0684	50.3184		75.4915	5.6173	10.5044	8.07174	10.7018
2030			1.	Protein-energy malnutrition		79.6673	38.8293	119.033		45.4782	34.1891		54.6893	2.21659	6.0129	6.98304	9.76538
2030			2.	Iodine deficiency		1.8696	0.930596	2.94675		1.00184	0.867755		1.41656	0.138275	0.208036	0.0580439	0.048686
2030			3.	Vitamin A deficiency		13.7016	6.56774	20.7725		6.6583	7.04334		10.1255	1.13827	1.71231	0.409644	0.31594
2030			4.	Iron-deficiency anaemia		13.8764	6.72096	21.4076		6.28292	7.59352		8.29614	2.05404	2.43093	0.576521	0.518806
2030	II.	Noncommunicable diseases				4434.05	4378.01	4580.21		2161.72	2272.33		133.744	42.3822	1423.94	920.48	1913.5
2030		A.	Malignant neoplasms			942.983	938.309	911.028		477.097	465.886		6.7726	10.8167	347.235	217.33	360.828
2030			1.	Mouth and oropharynx cancers		43.2095	42.3788	42.2113		28.0763	15.1332		0.0981422	0.154534	15.9051	10.9234	16.1283
2030			2.	Oesophagus cancer		48.435	47.9482	47.9218		29.3288	19.1063		0.00322562	0.00526808	18.0127	12.8912	17.5226
2030			3.	Stomach cancer		76.4777	76.666	73.4425		39.5169	36.9608		0.0476505	0.216257	29.6427	17.2632	29.3079
2030			4.	Colon and rectum cancers		48.7643	47.2672	46.0008		27.456	21.3083		0.0087619	0.0915177	17.1122	9.80889	21.7429
2030			5.	Liver cancer		105.276	103.233	106.006		69.2508	36.025		0.367288	0.287176	54.4139	23.0486	27.1587
2030			6.	Pancreas cancer		18.2168	17.981	17.0534		7.94498	10.2718		0.0004321	0.00523414	7.36015	4.50693	6.34407
2030			7.	Trachea, bronchus, lung cancers		34.8239	34.4205	49.3722		26.4843	8.33955		0	0	14.3741	10.6653	9.78444
2030			8.	Melanoma and other skin cancers		19.535	19.2832	18.2324		7.72754	11.8074		0.011996	0.0316925	5.80112	5.15053	8.53965
2030			9.	Breast cancer		83.5278	82.7463	75.7759		0.0890798	83.4388		0.0118009	0.0724324	36.8888	19.9726	26.5822
2030			10.	Cervix uteri cancer		88.5387	88.3884	79.8171		0	88.5387		0.000466066	0.0271417	37.185	23.5079	27.8181
2030			11.	Corpus uteri cancer		5.96742	5.92817	5.46368		0	5.96742		0.00433822	0.00999164	1.54502	1.31326	3.0948
2030			12.	Ovary cancer		23.5425	22.6158	20.0217		0	23.5425		0.0111071	0.160944	10.4317	5.83049	7.10828
2030			13.	Prostate cancer		90.0733	92.3118	85.0639		90.0733	0		0.0110717	0.0253387	6.43	19.7266	63.8804
2030			14.	Bladder cancer		23.2905	23.6245	22.1442		16.3745	6.91604		0.0227425	0.028802	5.42885	5.51615	12.294
2030			15.	Lymphomas, multiple myeloma		77.9006	77.1888	74.5002		48.2729	29.6277		2.32441	6.37901	30.6246	13.2537	25.3188
2030			16.	Leukaemia		30.5699	30.4787	28.8811		15.752	14.8179		0.829828	1.37769	13.2822	5.00807	10.072
2030		B.	Other neoplasms			22.1685	22.232	20.8654		10.2302	11.9383		1.4433	1.86754	9.10938	4.0872	5.66111
2030		C.	Diabetes mellitus			182.416	178.252	182.902		63.6985	118.717		0.17333	0.336797	66.033	46.9817	68.8908
2030		D.	Endocrine disorders			44.1641	41.13	46.9033		19.6072	24.557		6.44821	1.01412	18.4318	7.47967	10.7903
2030		E.	Neuropsychiatric conditions			152.064	143.344	160.124		93.0278	59.0361		14.9224	9.54391	79.9192	16.1612	31.5171
2030			1.	Unipolar depressive disorders		0.0023592	0.0021294	0.0025928		0.00160423	0.000754972		0	0	0.0023592	0	0
2030			2.	Bipolar disorder		0	0	0		0	0		0	0	0	0	0
2030			3.	Schizophrenia		0.0135267	0.0125686	0.0143027		0.00564678	0.00787993		0	0.00186437	0.0048145	0.00498991	0.00185794
2030			4.	Epilepsy		63.3318	58.6375	67.5597		39.9854	23.3464		4.36995	4.11354	41.7842	5.92308	7.14097
2030			5.	Alcohol use disorders		12.9449	12.9038	13.2667		9.31519	3.62968		0	0	9.65484	1.46488	1.82515
2030			6.	Alzheimer and other dementias		12.2248	12.8018	11.9787		6.50979	5.71501		0.343062	0.0563114	1.38835	1.73427	8.7028
2030			7.	Parkinson disease		9.02484	9.69885	8.67617		5.18374	3.8411		0.00285	0.000574478	0.366718	1.558	7.0967
2030			8.	Multiple sclerosis		0.611852	0.585929	0.626707		0.178982	0.43287		0	0.0523158	0.331039	0.134116	0.094381
2030			9.	Drug use disorders		7.17631	6.80932	7.61649		5.84497	1.33134		0	0	6.99459	0.112945	0.0687745
2030			10.	Post-traumatic stress disorder		0	0	0		0	0		0	0	0	0	0
2030			11.	Obsessive-compulsive disorder		0	0	0		0	0		0	0	0	0	0
2030			12.	Panic disorder		0	0	0		0	0		0	0	0	0	0
2030			13.	Insomnia (primary)		0	0	0		0	0		0	0	0	0	0
2030			14.	Migraine		0	0	0		0	0		0	0	0	0	0
2030		F.	Sense organ diseases			0.325791	0.337453	0.319003		0.166199	0.159592		0.00489358	0.00321092	0.00699385	0.0429181	0.267774
2030			1.	Glaucoma		0.000267648	0.000258904	0.000297256		0.000267648	0		0	0	0.000267648	0	0
2030			2.	Cataracts		0	0	0		0	0		0	0	0	0	0
2030			3.	Vision disorders, age-related		0	0	0		0	0		0	0	0	0	0
2030			4.	Hearing loss, adult onset		0	0	0		0	0		0	0	0	0	0
2030		G.	Cardiovascular diseases			2032.43	2077.46	2091.99		908.744	1123.69		13.1736	6.20434	532.027	424.335	1056.69
2030			1.	Rheumatic heart disease		32.704	28.6185	36.0242		10.7675	21.9366		1.27565	2.08044	21.8352	3.07323	4.43951
2030			2.	Hypertensive heart disease		128.321	131.052	131.54		46.5368	81.7839		0.104069	0.121951	31.7293	28.1689	68.1965
2030			3.	Ischaemic heart disease		661.938	675.372	691.646		341.792	320.146		0.161594	0.167894	156.625	170.222	334.761
2030			4.	Cerebrovascular disease		687.522	708.109	699.463		280.259	407.263		0.968339	1.64501	181.013	152.143	351.752
2030			5.	Inflammatory heart diseases		80.1339	78.2625	85.1176		41.0533	39.0806		5.84826	1.03078	32.7904	12.7391	27.7254
2030		H.	Respiratory diseases			494.763	480.784	555.249		299.933	194.83		18.2309	3.4345	158.571	105.484	209.043
2030			1.	Chronic obstructive pulmonary disease		245.952	243.536	293.383		162.171	83.7815		0.960625	0.111644	60.0396	58.7863	126.054
2030			2.	Asthma		46.7437	45.251	49.1002		25.0217	21.7221		0.962045	0.515877	18.4774	9.93051	16.8579
2030		I.	Digestive diseases			253.745	201.351	289.72		148.387	105.359		5.59643	4.03278	133.277	48.4635	62.3761
2030			1.	Peptic ulcer disease		24.1679	19.8253	27.2403		13.6897	10.4782		0.00264722	0.0578533	11.9016	4.22534	7.98048
2030			2.	Cirrhosis of the liver		89.9608	69.8033	104.653		56.7355	33.2253		0.367744	0.331052	47.6199	20.6738	20.9683
2030		J.	Genitourinary diseases			188.422	186.943	192.107		85.0025	103.419		3.57867	1.58092	56.0006	41.1024	86.159
2030			1.	Nephritis and nephrosis		177.297	175.304	181.182		77.862	99.435		3.2307	1.54224	54.6433	39.4942	78.3866
2030			2.	Benign prostatic hypertrophy		4.28252	4.774	3.90354		4.28252	0		0	0	0.232169	0.634631	3.41572
2030		K.	Skin diseases			39.4583	39.4948	39.8956		13.1476	26.3107		0.213155	0.172594	14.2979	7.45114	17.3235
2030		L.	Musculoskeletal diseases			12.0113	11.5902	12.3457		4.6322	7.37911		0.00421144	0.509838	6.31294	1.45361	3.73071
2030			1.	Rheumatoid arthritis		1.99253	1.97576	2.0436		0.522128	1.4704		0	0.0010466	0.699031	0.42785	0.864605
2030			2.	Osteoarthritis		0.0200199	0.0202542	0.019832		0.00545024	0.0145696		0	0	0.00449093	0.00318089	0.0123481
2030		M.	Congenital anomalies			69.0771	56.764	76.7486		38.0362	31.0409		63.1802	2.86443	2.71072	0.103721	0.217954
2030		N.	Oral conditions			0.0172778	0.0161784	0.0184719		0.0072923	0.00998554		0.00205012	0.000549607	0.00460972	0.00443373	0.00563467
2030	III.	Injuries				1577.5	1644.79	1476.33		1205.44	372.062		130.679	239.832	1076.16	70.5494	60.2801
2030		A.	Unintentional injuries			1039.59	1163.81	929.927		757.137	282.454		123.099	222.083	603.603	47.6507	43.1547
2030			1.	Road traffic accidents		541.556	673.638	410.443		397.51	144.046		37.1229	154.284	310.32	23.3547	16.4744
2030			2.	Poisonings		68.3763	68.4126	70.1068		43.9012	24.4751		9.20099	8.14015	43.3837	5.01472	2.63673
2030			3.	Falls		34.4413	35.3026	34.371		24.1891	10.2522		2.43849	6.62959	14.722	3.55668	7.09454
2030			4.	Fires		65.1425	64.2092	67.3776		35.7597	29.3828		24.3939	19.7776	14.7586	2.34794	3.86451
2030			5.	Drownings		114.727	112.889	119.64		93.4552	21.272		15.2727	16.2444	79.4847	3.38278	0.342616
2030			6.	Other unintentional injuries		215.347	209.359	227.989		162.321	53.0264		34.6705	17.0072	140.934	9.99396	12.7419
2030		B.	Intentional injuries			537.907	480.98	546.404		448.299	89.608		7.57914	17.7486	472.556	22.8986	17.1254
2030			1.	Self-inflicted injuries		66.9063	69.4143	67.5212		51.7953	15.111		0.00177367	3.07997	55.0969	4.38809	4.33959
2030			2.	Violence		244.809	249.011	259.575		192.694	52.115		7.1986	12.1773	211.773	7.9925	5.66733
2030			3.	War		225.996	162.352	219.108		203.653	22.3431		0.341097	2.46518	205.594	10.4949	7.10079
