# Supplementary material for: Projections of Global Mortality and Burden of Disease from 2002 to 2030
Source: PLoS Med. 2006 Nov 28;3(11):e442. doi: 10.1371/journal.pmed.0030442 (PMC1664601; doi:10.1371/journal.pmed.0030442)
Supplement: Dataset S2 — (1 MB XLS) [file pmed.0030442.sd003.xls]

## Sheet: World
DALYs by cause, scenario, sex and age for the years 2002, 2015 and 2030
Source: Mathers CD, Loncar D (2006). Projections of global mortality and burden of disease from 2002 to 2030.
World
						Total DALYs ('000)				Baseline DALYs ('000)			Baseline projections ('000) by age group
Year		Cause				Baseline	Optimistic	Pessimistic		Male	Female		0-4	5-14	15-59	60-69	70+
2002	Population (millions)					6213.87	6213.87	6213.87		3125.56	3088.31		616.908	1209.7	3758.5	347.44	281.324
2002		All Causes				1.48625e+06	1.48625e+06	1.48625e+06		771906	714343		432864	111758	725295	113775	102558
2002	I.	Communicable, maternal, perinatal and nutritional conditions				609047	609047	609047		297136	311911		357838	45379.8	187783	10162.2	7885.24
2002		A.	Infectious and parasitic diseases			346406	346406	346406		178412	167995		174232	27483.7	134656	6397.31	3637.26
2002			1.	Tuberculosis		34602.3	34602.3	34602.3		21829.9	12772.4		1553.62	1608.33	27701.7	2620.69	1118.02
2002			2.	STDs excluding HIV		11246.7	11246.7	11246.7		3867.28	7379.46		3260.93	123.399	7627.73	167.767	66.9252
2002			3.	HIV/AIDS		82379.7	82379.7	82379.7		42348.9	40030.8		11430.5	4524	65823.3	567.372	34.5476
2002			4.	Diarrhoeal diseases		64759.4	64759.4	64759.4		33530.7	31228.7		58857	1549.59	3537.63	400.221	414.975
2002			5.	Childhood-cluster diseases		41027.5	41027.5	41027.5		20461.8	20565.7		37646.1	2884.15	482.302	9.45091	5.48675
2002				a.	Pertussis	12578.3	12578.3	12578.3		6266.91	6311.42		12477	101.227	0.087029	0	0
2002				d.	Measles	20955.4	20955.4	20955.4		10455	10500.4		18259.2	2537.88	158.313	0.0228684	0
2002				e.	Tetanus	7160.12	7160.12	7160.12		3568.39	3591.72		6728.99	199.818	219.301	7.95039	4.061
2002			6.	Meningitis		6177	6177	6177		3073.81	3103.2		3178.3	1336.43	1488.45	102.75	71.0722
2002			7.	Hepatitis B and C		3145.62	3145.62	3145.62		2114.16	1031.46		392.956	281.238	2177.35	192.81	101.267
2002			8.	Malaria		34760.2	34760.2	34760.2		17445.3	17314.9		31150.1	1276.69	2103.51	141.791	88.0919
2002			9.	Tropical-cluster diseases		12634.1	12634.1	12634.1		8493.07	4141.02		576.133	3716.89	7980.71	254.864	105.49
2002			10.	Leprosy		198.667	198.667	198.667		116.841	81.826		18.1979	48.3766	111.948	12.0129	8.13164
2002			11.	Dengue		611.163	611.163	611.163		276.856	334.307		138.725	395.828	68.4954	4.58771	3.52704
2002			12.	Japanese encephalitis		712.093	712.093	712.093		341.136	370.956		261.218	223.94	219.503	4.83106	2.6001
2002			13.	Trachoma		2311.34	2311.34	2311.34		592.692	1718.65		3.81512	9.61206	1551.76	452.893	293.263
2002			14.	Intestinal nematode infections		3890.25	3890.25	3890.25		1964.83	1925.42		529.169	2474.49	825.425	41.1392	20.0296
2002		B.	Respiratory infections			96708.7	96708.7	96708.7		49031.1	47677.6		64848.1	13167.6	11667.9	3190.05	3835.06
2002		C.	Maternal conditions			33435.9	33435.9	33435.9		0	33435.9		0.0505804	226.118	33209.7	0.0187466	0.0161771
2002		D.	Perinatal conditions			98236.4	98236.4	98236.4		53653.1	44583.3		98231.7	2.5474	2.08537	0.0419447	0.0160383
2002		E.	Nutritional deficiencies			34259.8	34259.8	34259.8		16040	18219.9		20525.5	4499.87	8246.85	574.783	412.888
			1.	Protein-energy malnutrition		16838.2	16838.2	16838.2		8550.63	8287.59		14835.1	1186.61	540.916	139.275	136.298
			2.	Iodine deficiency		3498.45	3498.45	3498.45		1748.76	1749.69		2572.43	917.628	6.67234	1.06928	0.648633
			3.	Vitamin A deficiency		780.627	780.627	780.627		358.894	421.733		564.344	169.7	39.2052	5.27909	2.0981
			4.	Iron-deficiency anaemia		12171.9	12171.9	12171.9		4982.28	7189.63		2063.29	2129.61	7444.11	366.957	167.948
2002	II.	Noncommunicable diseases				697079	697079	697079		356184	340895		58490.4	34714.3	413424	98714.1	91736
2002		A.	Malignant neoplasms			75336	75336	75336		40543.3	34792.8		1272.69	1885.35	41846	17525	12807
2002			1.	Mouth and oropharynx cancers		3568.23	3568.23	3568.23		2562.01	1006.22		14.4753	22.5987	2182.55	903.453	445.159
2002			2.	Oesophagus cancer		4272.13	4272.13	4272.13		2788.23	1483.9		2.23721	3.98362	2212.58	1302.53	750.806
2002			3.	Stomach cancer		8088.62	8088.62	8088.62		5059.39	3029.24		4.16821	15.2819	4459.53	2044.38	1565.27
2002			4.	Colon and rectum cancers		5810.2	5810.2	5810.2		3124.94	2685.25		1.6636	9.21963	2921.95	1506.63	1370.74
2002			5.	Liver cancer		7088.23	7088.23	7088.23		5014.78	2073.45		58.5637	43.5508	4621.75	1498.86	865.502
2002			6.	Pancreas cancer		1966.67	1966.67	1966.67		1112.09	854.579		0.691662	3.49119	956.324	546.408	459.759
2002			7.	Trachea, bronchus, lung cancers		11248.7	11248.7	11248.7		8000.12	3248.53		9.25955	42.3547	5348.72	3518.71	2329.61
2002			8.	Melanoma and other skin cancers		687.036	687.036	687.036		380.382	306.654		2.46139	5.89081	422.501	136.173	120.01
2002			9.	Breast cancer		6145.01	6145.01	6145.01		23.0945	6121.92		0.848259	2.8513	4314.96	1099.86	726.494
2002			10.	Cervix uteri cancer		3265.71	3265.71	3265.71		0	3265.71		0.46415	1.96271	2317.92	626.356	318.999
2002			11.	Corpus uteri cancer		1113.3	1113.3	1113.3		0	1113.3		2.34638	3.29546	686.229	247.939	173.494
2002			12.	Ovary cancer		1636.27	1636.27	1636.27		0	1636.27		2.19782	23.0843	1053.85	333.33	223.814
2002			13.	Prostate cancer		1653.81	1653.81	1653.81		1653.81	0		0.675001	1.51967	266.566	557.648	827.405
2002			14.	Bladder cancer		1485.76	1485.76	1485.76		1007.26	478.508		23.4366	10.7424	569.069	427.478	455.037
2002			15.	Lymphomas, multiple myeloma		4278.99	4278.99	4278.99		2278.58	2000.41		168.545	468.586	2416.95	670.201	554.71
2002			16.	Leukaemia		4618.6	4618.6	4618.6		2615.49	2003.11		508.866	805.46	2604.24	376.558	323.468
2002		B.	Other neoplasms			1739.98	1739.98	1739.98		914.895	825.082		140.403	158.588	975.735	226.765	238.487
2002		C.	Diabetes mellitus			16165.2	16165.2	16165.2		7604.56	8560.61		113.233	201.827	10053.8	3291.1	2505.24
2002		D.	Endocrine disorders			7917.79	7917.79	7917.79		3548.46	4369.33		2437.33	589.093	3791.5	543.042	556.822
2002		E.	Neuropsychiatric conditions			192480	192480	192480		93819.4	98660.4		13808.4	16659	146275	6923.63	8813.57
2002			1.	Unipolar depressive disorders		67062.5	67062.5	67062.5		26655.8	40406.7		0.721743	6029.37	57645.1	2730.61	656.692
2002			2.	Bipolar disorder		13904.5	13904.5	13904.5		7025.4	6879.06		0.419838	715.142	13179.1	8.39739	1.35283
2002			3.	Schizophrenia		16089.5	16089.5	16089.5		8205.28	7884.17		1.53384	1638.1	14353.9	62.1464	33.8136
2002			4.	Epilepsy		7267.27	7267.27	7267.27		3851.16	3416.11		950.35	1718.34	4334.37	167.916	96.2829
2002			5.	Alcohol use disorders		20238	20238	20238		17159.8	3078.22		3.10927	250.083	19560.2	344.189	80.3858
2002			6.	Alzheimer and other dementias		10392.1	10392.1	10392.1		3990.7	6401.37		461.212	225.36	1131.81	2121.26	6452.43
2002			7.	Parkinson disease		1569.79	1569.79	1569.79		778.198	791.596		11.3813	8.98191	580.876	410.066	558.489
2002			8.	Multiple sclerosis		1469.15	1469.15	1469.15		635.411	833.74		1.98919	159.762	1255.09	35.9402	16.3715
2002			9.	Drug use disorders		7328.56	7328.56	7328.56		5742.71	1585.85		0.999081	175.964	7124.69	22.9884	3.91772
2002			10.	Post-traumatic stress disorder		3324.42	3324.42	3324.42		919.687	2404.73		0.0290706	59.0807	3243.01	13.2209	9.07175
2002			11.	Obsessive-compulsive disorder		4897.97	4897.97	4897.97		2104.05	2793.92		0	611.69	4221.6	47.3479	17.3362
2002			12.	Panic disorder		6734.87	6734.87	6734.87		2284.64	4450.23		0	228.619	6470.99	21.2827	13.9793
2002			13.	Insomnia (primary)		3464.18	3464.18	3464.18		1488.54	1975.64		0	88.3516	2968.8	286.819	120.21
2002			14.	Migraine		7639.02	7639.02	7639.02		2070.67	5568.36		238.806	3073.75	4325.91	0.486809	0.0739486
2002		F.	Sense organ diseases			69083.8	69083.8	69083.8		32316.8	36767		73.0196	382.585	48894.7	13203.4	6530.08
2002			1.	Glaucoma		3835.11	3835.11	3835.11		1703.36	2131.75		14.0218	74.687	2630.4	721.422	394.579
2002			2.	Cataracts		25155.8	25155.8	25155.8		11010.3	14145.5		37.3449	224.389	17541.8	4934.49	2417.73
2002			3.	Vision disorders, age-related		14102.2	14102.2	14102.2		6262.78	7839.46		14.9887	78.6692	9273.35	3022.54	1712.68
2002			4.	Hearing loss, adult onset		25951.9	25951.9	25951.9		13321.4	12630.5		0	0	19431.7	4521.4	1998.75
2002		G.	Cardiovascular diseases			148985	148985	148985		80401.9	68583.2		2884.59	2301.16	66538.9	35920.3	41340.2
2002			1.	Rheumatic heart disease		5837.49	5837.49	5837.49		2550.5	3286.99		508.416	523.898	3739.65	621.479	444.047
2002			2.	Hypertensive heart disease		7687.6	7687.6	7687.6		3881.79	3805.81		51.8905	57.4456	3260.37	1967.26	2350.64
2002			3.	Ischaemic heart disease		59147.1	59147.1	59147.1		34668.3	24478.8		192.318	506.753	26868.5	15529.2	16050.3
2002			4.	Cerebrovascular disease		49455.6	49455.6	49455.6		25623.1	23832.5		407.873	361.796	19069.8	13791.5	15824.6
2002			5.	Inflammatory heart diseases		5844.6	5844.6	5844.6		3429.53	2415.07		478.294	212.82	3422.93	831.472	899.081
2002		H.	Respiratory diseases			55384.5	55384.5	55384.5		30401.4	24983		4301.73	5218.9	27231.6	8640.98	9991.26
2002			1.	Chronic obstructive pulmonary disease		28048.7	28048.7	28048.7		15488.4	12560.3		124.484	55.4858	13485.2	6610.16	7773.36
2002			2.	Asthma		15240.9	15240.9	15240.9		8191.11	7049.77		1893.89	4409.37	8212.95	421.477	303.197
2002		I.	Digestive diseases			46335.5	46335.5	46335.5		25317.1	21018.4		5630.67	2499.63	28920.9	5192.63	4091.65
2002			1.	Peptic ulcer disease		4635.48	4635.48	4635.48		2934.04	1701.44		198.783	154.551	3325.98	534.295	421.866
2002			2.	Cirrhosis of the liver		13917.1	13917.1	13917.1		8592.34	5324.76		894.224	577.616	9594.68	1878.88	971.7
2002		J.	Genitourinary diseases			15171.3	15171.3	15171.3		8558.58	6612.74		895.415	852.711	9367.44	2098.75	1957.01
2002			1.	Nephritis and nephrosis		8387.35	8387.35	8387.35		4443.16	3944.19		630.957	711.504	4676.92	1241.71	1126.26
2002			2.	Benign prostatic hypertrophy		2457.88	2457.88	2457.88		2457.88	0		0	0	2020.44	258.194	179.24
2002		K.	Skin diseases			3734.88	3734.88	3734.88		1846.05	1888.83		414.704	445.187	2293.74	271.98	309.271
2002		L.	Musculoskeletal diseases			30051.3	30051.3	30051.3		13194.6	16856.6		257.394	1360.02	22287.3	3841.1	2305.47
2002			1.	Rheumatoid arthritis		4844.09	4844.09	4844.09		1380.19	3463.89		35.2795	399.977	3637.37	496.408	275.047
2002			2.	Osteoarthritis		14810.9	14810.9	14810.9		5776.36	9034.52		0.484324	9.73964	10799.5	2609.32	1391.79
2002		M.	Congenital anomalies			27363.1	27363.1	27363.1		14119.6	13243.5		25429.2	790.154	1096.57	28.1528	19.0547
2002		N.	Oral conditions			7330.79	7330.79	7330.79		3597.09	3733.7		831.613	1370.13	3850.94	1007.2	270.899
2002	III.	Injuries				180123	180123	180123		118586	61536.4		16536.3	31663.4	124088	4899.11	2936.41
2002		A.	Unintentional injuries			131883	131883	131883		83279.1	48603.9		15896.4	28720.7	81243.7	3668.17	2354.06
2002			1.	Road traffic accidents		38243.6	38243.6	38243.6		26916.9	11326.7		2497.19	7398.62	26941.3	948.946	457.515
2002			2.	Poisonings		7323.94	7323.94	7323.94		4754.33	2569.61		538.727	774.756	5404.63	472.428	133.399
2002			3.	Falls		16116.2	16116.2	16116.2		9882.03	6234.21		1976.37	4213.47	8437.71	647.443	841.25
2002			4.	Fires		11379.8	11379.8	11379.8		4559.41	6820.35		2198.3	2507.52	6367.61	181.689	124.647
2002			5.	Drownings		10659.9	10659.9	10659.9		7337.86	3322.04		1957.09	3265.63	5155.99	177.804	103.383
2002			6.	Other unintentional injuries		48159.6	48159.6	48159.6		29828.7	18330.9		6728.72	10560.7	28936.5	1239.86	693.869
2002		B.	Intentional injuries			48239.8	48239.8	48239.8		35307.3	12932.5		639.913	2942.79	42843.8	1230.93	582.352
2002			1.	Self-inflicted injuries		20475.3	20475.3	20475.3		12180.6	8294.75		4.03	1022.84	18199.9	817.432	431.067
2002			2.	Violence		21153	21153	21153		17274.2	3878.86		491.964	1528.97	18719.7	294.913	117.487
2002			3.	War		6260.22	6260.22	6260.22		5565.39	694.834		112.628	364.092	5645.96	108.7	28.8416
2015	Population (millions)					7103.3	6475.14	6418.25		3522.05	3581.25		650.275	1233.57	4380.16	470.016	369.284
2015		All Causes				1.49282e+06	1.37078e+06	1.64459e+06		790725	702099		329180	92266.7	811534	134930	124914
2015	I.	Communicable, maternal, perinatal and nutritional conditions				515598	413895	622756		265044	250554		262948	30515.8	206512	8435.24	7187.65
2015		A.	Infectious and parasitic diseases			321358	254834	386919		172601	148757		124088	19317	169387	5418.17	3147.79
2015			1.	Tuberculosis		21958.1	16726.9	28595.6		13821.7	8136.42		1152.66	1033.43	17844.9	1368.78	558.322
2015			2.	STDs excluding HIV		9696.09	7780.09	11575.3		3489.37	6206.72		2444.45	94.2199	6963.77	130.056	63.5969
2015			3.	HIV/AIDS		128852	109815	142524		72033.2	56818.5		3518.21	5001.35	118816	1387.67	128.228
2015			4.	Diarrhoeal diseases		44115.7	35318.4	57197.9		23357.7	20758		39491	1069.04	2752.16	358.74	444.741
2015			5.	Childhood-cluster diseases		28646.1	20617	36228.6		14691.3	13954.8		26545.4	1822.85	264.761	7.6403	5.38253
2015				a.	Pertussis	8726.1	6418.61	11091.3		4472.1	4254		8624.99	101.069	0.0423514	0	0
2015				d.	Measles	14892.5	10550.2	18698.4		7632.71	7259.74		13244.1	1581.8	66.5067	0.00772009	0
2015				e.	Tetanus	4870.77	3522.16	6244.37		2501.98	2368.79		4570.31	124.421	165.55	6.41714	4.07295
2015			6.	Meningitis		3527.56	2583.12	4800.53		1829.01	1698.55		1782.57	682.117	923.429	73.2832	66.1593
2015			7.	Hepatitis B and C		2151.31	1613.59	2842.4		1429.95	721.358		312.847	211.418	1392.13	141.239	93.6741
2015			8.	Malaria		30779.5	22335.2	36961.8		15576.2	15203.2		27776.6	874.232	1900.92	130.942	96.7129
2015			9.	Tropical-cluster diseases		9747.21	7080.96	12803.2		6770.94	2976.27		420.614	2385.82	6613.45	222.64	104.688
2015			10.	Leprosy		130.626	115.916	147.485		79.7621	50.8638		10.9688	26.2735	76.2735	9.29876	7.81134
2015			11.	Dengue		268.919	181.836	369.058		130.008	138.911		58.1373	165.752	37.9637	3.3828	3.6829
2015			12.	Japanese encephalitis		304.123	232.376	445.867		156.347	147.776		102.111	73.3521	122.905	3.3681	2.38715
2015			13.	Trachoma		1957.78	1482.85	2445		535.053	1422.72		2.60605	5.70526	1255.19	401.029	293.245
2015			14.	Intestinal nematode infections		2703.46	2046.18	3388.33		1406.21	1297.26		377.698	1665.27	602.287	37.214	20.9977
2015		B.	Respiratory infections			67338.8	50403.6	86079.6		36107.1	31231.7		42976.4	8377.97	9747.05	2572.01	3665.34
2015		C.	Maternal conditions			21718.1	16059.9	30131.8		0	21718.1		0.0222781	224.562	21493.5	0.0138179	0.0175807
2015		D.	Perinatal conditions			80782.1	73161.9	89562.2		44352.4	36429.7		80779.4	1.39739	1.20833	0.0346455	0.0125189
2015		E.	Nutritional deficiencies			24401	19435.8	30064.1		11983.6	12417.5		15103.9	2594.87	5882.75	445.016	374.489
2015			1.	Protein-energy malnutrition		12063.2	9600.21	14699.8		6294.36	5768.88		10832.1	604.985	384.517	111.227	130.415
2015			2.	Iodine deficiency		2559.41	2090.47	3092.84		1308.99	1250.42		1976.57	575.514	5.91017	0.865567	0.5554
2015			3.	Vitamin A deficiency		657.925	471.286	815.156		305.994	351.931		498.056	113.602	39.3151	4.84714	2.10539
2015			4.	Iron-deficiency anaemia		8495.5	6801.81	10629.4		3790.48	4705.02		1495.67	1253.7	5301.55	288.482	156.097
2015	II.	Noncommunicable diseases				782651	761412	817355		395454	387198		49864.2	32200.3	466522	120253	113812
2015		A.	Malignant neoplasms			90200.9	88393.7	91130.1		48126.2	42074.8		1362.75	1852.75	48306.3	22485.5	16193.6
2015			1.	Mouth and oropharynx cancers		4401.26	4233.63	4501.6		3046.92	1354.34		17.6647	26.1258	2582.37	1153.3	621.807
2015			2.	Oesophagus cancer		5379.94	5265.44	5402.1		3391.74	1988.2		2.74487	4.66145	2642.5	1741.31	988.729
2015			3.	Stomach cancer		9692.65	9539.13	9728.84		6034.64	3658.01		4.57179	16.7058	5050.37	2602.46	2018.55
2015			4.	Colon and rectum cancers		6608.24	6520.32	6590.33		3537.49	3070.75		1.85149	10.4242	3190.42	1762.45	1643.1
2015			5.	Liver cancer		8549.39	8380.83	8665.9		6022.93	2526.45		59.2457	42.6571	5370.45	1962.28	1114.76
2015			6.	Pancreas cancer		2192.03	2158.66	2200.76		1224.6	967.426		0.582713	2.83078	1018.63	628.712	541.273
2015			7.	Trachea, bronchus, lung cancers		14857.5	14573.4	15289.2		10371.5	4486.07		0.00249078	0.0123041	7015.1	4890.66	2951.78
2015			8.	Melanoma and other skin cancers		745.572	731.296	753.401		410.077	335.495		2.88142	6.31682	423.75	163.469	149.156
2015			9.	Breast cancer		7192.85	7024.42	7244.45		23.401	7169.45		0.959694	3.38481	4900.4	1406.58	881.526
2015			10.	Cervix uteri cancer		4153.08	4023.8	4155.03		0	4153.08		0.527523	2.44977	2825.69	880.327	444.079
2015			11.	Corpus uteri cancer		1318.7	1325.03	1280.54		0	1318.7		10.4914	20.5307	778.312	309.536	199.826
2015			12.	Ovary cancer		1872.38	1817.11	1872.89		0	1872.38		2.75495	27.0683	1163.96	411.099	267.495
2015			13.	Prostate cancer		2029.44	2021.02	2020.66		2029.44	0		0.796182	1.7363	301.592	658.671	1066.65
2015			14.	Bladder cancer		1811.08	1783.67	1805.19		1205.61	605.464		28.6359	11.5288	668.966	515.598	586.349
2015			15.	Lymphomas, multiple myeloma		5096.4	4968.41	5137		2667.31	2429.08		204.671	535.88	2806.34	846.055	703.45
2015			16.	Leukaemia		4861.89	4766.73	4924.64		2726.89	2135		515.641	741.098	2742.66	468.094	394.396
2015		B.	Other neoplasms			2035.02	1997.31	2056.1		1054.39	980.633		150.577	167.246	1131.01	288.294	297.894
2015		C.	Diabetes mellitus			25996.5	23839	27804.7		11047	14949.4		97.4442	163.43	16569.3	5145.98	4020.29
2015		D.	Endocrine disorders			7311.64	6711.26	7955.04		3336.28	3975.37		1718.98	446.33	3787.3	665.434	693.599
2015		E.	Neuropsychiatric conditions			213163	212440	214233		101757	111405		11841.3	16473.8	164003	9256.14	11587.9
2015			1.	Unipolar depressive disorders		78511.9	78672	78216.6		30369.7	48142.2		0.630667	6101.75	67765.9	3809.35	834.3
2015			2.	Bipolar disorder		14822.1	14681.3	15116.5		7479.7	7342.42		0.316665	692.016	14117.4	10.9102	1.50676
2015			3.	Schizophrenia		17353.1	17218	17622.9		8710.28	8642.77		1.18184	1519.98	15710.7	78.4698	42.7211
2015			4.	Epilepsy		7419.37	7081.94	7865.06		3948.92	3470.44		821.339	1609.05	4665.04	205.328	118.598
2015			5.	Alcohol use disorders		21152.7	21127.8	21170.3		17945.5	3207.18		2.50558	239.946	20395.9	419.809	94.4944
2015			6.	Alzheimer and other dementias		13539.7	13608.9	13449.3		5138.78	8400.88		466.915	218.709	1331.49	2868.34	8654.2
2015			7.	Parkinson disease		1762.34	1717.15	1831.67		879.984	882.361		9.86275	6.70412	628.68	463.817	653.28
2015			8.	Multiple sclerosis		1585.93	1578.04	1597.85		682.095	903.838		1.54489	157.764	1366.5	41.61	18.5096
2015			9.	Drug use disorders		8269.75	8211.61	8385.42		6489.46	1780.3		0.789132	180.463	8054.49	29.1341	4.87198
2015			10.	Post-traumatic stress disorder		3811.44	3817.76	3799.84		1040.7	2770.74		0.025673	60.3586	3721.06	18.4809	11.5131
2015			11.	Obsessive-compulsive disorder		5579.15	5578.4	5587.44		2379.01	3200.14		0	694.212	4799.94	64.5217	20.4736
2015			12.	Panic disorder		7370.21	7340.71	7432.41		2487.51	4882.71		0	227.636	7096.7	28.7805	17.0922
2015			13.	Insomnia (primary)		4121.6	4132.02	4102.9		1754.59	2367.01		0	87.5508	3494.15	389.732	150.162
2015			14.	Migraine		7736.26	7695.09	7825.48		2110.56	5625.7		245.782	3083.34	4406.41	0.65099	0.0839823
2015		F.	Sense organ diseases			86273.4	90401.5	90178.8		39708.2	46565.2		73.5365	371.827	60261.9	17219.4	8346.65
2015			1.	Glaucoma		5200.43	5228.33	5155.53		2239.69	2960.74		15.8415	85.3365	3551.89	1024.25	523.107
2015			2.	Cataracts		31316.8	34871.4	34345.9		13781.7	17535		36.8735	212.326	21622.2	6198.13	3247.22
2015			3.	Vision disorders, age-related		17937.5	18659.7	18437.9		7755.81	10181.7		16.0447	70.4686	11575.1	4100.25	2175.67
2015			4.	Hearing loss, adult onset		31779.8	31605.5	32197.8		15911.6	15868.1		0	0	23495.1	5892.58	2392.14
2015		G.	Cardiovascular diseases			160261	152162	171474		85880.2	74380.8		2889.54	1596.37	68392	38976.2	48406.9
2015			1.	Rheumatic heart disease		5486.94	5086.92	6244.35		2519.8	2967.14		470.708	345.103	3476.85	675.351	518.92
2015			2.	Hypertensive heart disease		8357.61	7846.19	9173.73		4334.34	4023.27		53.0144	43.9121	3308.89	2072.59	2879.2
2015			3.	Ischaemic heart disease		64825.1	62114.8	69019.3		37296.5	27528.6		185.117	377.221	28640.5	17025	18597.3
2015			4.	Cerebrovascular disease		53814.9	50759	56655.6		27654.1	26160.8		415.785	279.411	19869.2	14962.2	18288.3
2015			5.	Inflammatory heart diseases		5856.06	5533.16	6469.69		3398.78	2457.28		493.737	144.522	3275.12	876.51	1066.17
2015		H.	Respiratory diseases			66867.9	62394.4	72005.6		37516.5	29351.4		4155.76	5169.26	32800	11296.3	13446.5
2015			1.	Chronic obstructive pulmonary disease		36829	33937.9	40543.1		20968.1	15860.9		114.997	42.3483	17270.9	8824.91	10575.9
2015			2.	Asthma		16703.6	16357.5	17022.7		9057.73	7645.82		1964.16	4489.08	9343.79	511.142	395.383
2015		I.	Digestive diseases			42881.6	38158.3	49203.9		24149.8	18731.9		3522.77	1614.43	27462.5	5556.57	4725.37
2015			1.	Peptic ulcer disease		4454.66	4057.98	5089.35		2887.49	1567.17		132.676	90.1872	3150	584.821	496.976
2015			2.	Cirrhosis of the liver		13029.8	11592.1	15143.1		8327.55	4702.27		654.942	352.743	9065.6	1909.28	1047.27
2015		J.	Genitourinary diseases			15988.4	15073.7	17204.1		9567.01	6421.39		643.714	549.501	9796.4	2532.82	2465.97
2015			1.	Nephritis and nephrosis		8431.18	7822.55	9248.3		4575	3856.18		456.93	460.187	4566.82	1513.06	1434.19
2015			2.	Benign prostatic hypertrophy		3260.95	3276.37	3234.52		3260.95	0		0	0	2715.93	316.123	228.901
2015		K.	Skin diseases			4460.42	4441.04	4468.67		2176	2284.42		423.203	458.96	2793.41	358.981	425.862
2015		L.	Musculoskeletal diseases			34999.1	34697.9	35672.5		14728.8	20270.3		245.146	1355.92	25521	5051.8	2825.18
2015			1.	Rheumatoid arthritis		5628.34	5601.74	5694.27		1576.35	4051.98		37.2608	389.242	4205.66	660.017	336.159
2015			2.	Osteoarthritis		18020	17925.6	18247.4		6832.13	11187.9		0.358701	10.0579	12910.7	3440.48	1658.44
2015		M.	Congenital anomalies			23475.9	21928.6	25287.3		12214	11261.9		21873.1	577.546	969.687	33.005	22.5303
2015		N.	Oral conditions			8736.92	8772.93	8681.43		4191.82	4545.09		866.372	1402.96	4727.37	1386.29	353.922
2015	III.	Injuries				194575	195469	204475		130228	64347		16367.6	29550.5	138501	6242.03	3913.71
2015		A.	Unintentional injuries			138689	141059	146222		88604.1	50084.4		15649.2	26513.3	88733	4620.43	3172.66
2015			1.	Road traffic accidents		51767.9	51058.4	46857		36438.5	15329.3		3201.18	9442.93	37151.3	1345.25	627.254
2015			2.	Poisonings		6663.22	6454.13	7629.98		4174.04	2489.18		510.363	664.869	4789.38	529.633	168.973
2015			3.	Falls		15152.5	15678.8	16949.2		9180.48	5972.07		1794.27	3405.64	7983.78	823.862	1145
2015			4.	Fires		11364.2	11523	12366.8		4650.41	6713.74		2276.47	2378.09	6320.18	221.252	168.159
2015			5.	Drownings		8930.5	8356.77	10273.2		6289.7	2640.8		1663.93	2176.9	4740.95	210.698	138.018
2015			6.	Other unintentional injuries		44810.2	47988	52145.3		27871	16939.2		6202.96	8444.85	27747.4	1489.74	925.253
2015		B.	Intentional injuries			55886.2	54410.3	58253.6		41623.5	14262.7		718.477	3037.27	49767.8	1621.59	741.056
2015			1.	Self-inflicted injuries		22173.6	22272.4	23087.3		13354.8	8818.76		4.48483	910.126	19640.1	1084.82	534.008
2015			2.	Violence		25073.1	24590.6	26387.2		20595.4	4477.71		556.277	1667.24	22305.7	385.511	158.288
2015			3.	War		8235.54	7137.6	8357.82		7340.78	894.764		124.213	433.228	7498.07	138.092	41.9411
2030	Population (millions)					7917.12	7423.41	7138.35		3847.91	4069.21		629.371	1269.43	4825.63	645.856	546.827
2030		All Causes				1.54282e+06	1.33015e+06	1.77267e+06		815266	727551		241587	81506	883345	166323	170057
2030	I.	Communicable, maternal, perinatal and nutritional conditions				462953	275533	610444		242356	220597		186598	21750.6	238644	8827.26	7134.08
2030		A.	Infectious and parasitic diseases			321740	182024	407232		172777	148963		86094.6	14706.9	211649	6164.6	3124.79
2030			1.	Tuberculosis		14328.3	6790.21	24578.3		9067.34	5260.99		720.381	657.763	11860.7	766.324	323.19
2030			2.	STDs excluding HIV		8075.54	5091.06	11337.2		3080.94	4994.6		1684.23	71.0907	6142.03	113.462	64.7157
2030			3.	HIV/AIDS		185923	107633	190309		99911.3	86011.8		3790.58	5808.65	173045	3058.81	220.274
2030			4.	Diarrhoeal diseases		29369.4	19657.7	48399.4		16017.5	13352		25597.7	754.807	2193.34	340.278	483.303
2030			5.	Childhood-cluster diseases		18825.5	9169.29	30062		9977.18	8848.31		17525.6	1123.63	164.182	6.34305	5.73338
2030				a.	Pertussis	5736.32	2907.08	9145.88		3036.44	2699.88		5635.34	100.964	0.0175824	0	0
2030				d.	Measles	9837.13	4686.25	15594.1		5208.67	4628.46		8866.28	943.192	27.6509	0.0033731	0
2030				e.	Tetanus	3173.64	1532.07	5194.62		1687.14	1486.5		2962.07	73.8751	127.942	5.53475	4.21941
2030			6.	Meningitis		2038.97	1028.71	3669.59		1118.62	920.35		951.816	366.043	596.335	58.3322	66.4416
2030			7.	Hepatitis B and C		1512.22	839.75	2540.06		1015.8	496.42		219.867	144.215	947.825	107.617	92.6998
2030			8.	Malaria		23433.1	11780.7	34662.3		12184.3	11248.8		20930.7	564.562	1710.84	124.331	102.712
2030			9.	Tropical-cluster diseases		7585.14	3936.66	12626.2		5410.56	2174.58		281.359	1487.04	5507.4	200.569	108.781
2030			10.	Leprosy		83.7249	64.8201	111.585		54.7028	29.0221		5.30178	12.5332	49.7667	7.77022	8.35297
2030			11.	Dengue		114.943	56.3332	226.045		59.534	55.4095		20.7074	67.2652	20.2299	2.703	4.038
2030			12.	Japanese encephalitis		149.931	83.3364	302.817		86.9414	62.9893		41.7271	29.0336	74.0479	2.7257	2.39641
2030			13.	Trachoma		1784.33	1011.28	2708.13		518.895	1265.43		1.59198	3.29052	1109.93	357.831	311.686
2030			14.	Intestinal nematode infections		1906.92	1105.34	2927.77		1021.56	885.361		263.363	1123.36	459.379	36.3318	24.4845
2030		B.	Respiratory infections			47203.2	25619.1	74386.6		26073.2	21130		27696.7	5259.98	8323.76	2287.43	3635.37
2030		C.	Maternal conditions			14623.9	8460.65	27634.4		0	14623.9		0.00729709	223.853	14400	0.00693645	0.0196613
2030		D.	Perinatal conditions			62384.2	48847.6	75945.7		34781.6	27602.7		62382.8	0.750731	0.64985	0.0318763	0.0163681
2030		E.	Nutritional deficiencies			17002	10581.7	25244.8		8724.68	8277.31		10423.5	1559.21	4270.2	375.188	373.889
2030			1.	Protein-energy malnutrition		8313.09	5131.79	12118		4471.18	3841.91		7486.04	320.598	285.844	92.6769	127.928
2030			2.	Iodine deficiency		1789.48	1173.26	2518.42		940.994	848.488		1405.3	377.345	5.63083	0.694416	0.50759
2030			3.	Vitamin A deficiency		494.601	239.022	770.301		238.195	256.406		373.707	74.4899	39.9062	4.37211	2.12594
2030			4.	Iron-deficiency anaemia		6016.29	3825.93	9165.73		2880.88	3135.41		1004.15	762.921	3833.05	248.209	167.957
2030	II.	Noncommunicable diseases				870289	838287	936014		430864	439425		39641.9	30624.2	493667	149265	157091
2030		A.	Malignant neoplasms			105001	101138	106459		55453.6	49547.5		1315	1870.51	50434.2	28519	22862.4
2030			1.	Mouth and oropharynx cancers		5344.65	4947.32	5547.92		3570.38	1774.27		19.1388	29.069	2841.36	1538.31	916.779
2030			2.	Oesophagus cancer		6436.86	6198.3	6413.68		3923.66	2513.2		2.8835	4.97054	2682.04	2260.21	1486.75
2030			3.	Stomach cancer		11111.7	10867.7	10981.7		6772.69	4339.04		4.33736	17.8209	4883.91	3293.59	2912.07
2030			4.	Colon and rectum cancers		7254.92	7112.4	7138.31		3853.48	3401.44		1.91086	11.737	3118.95	1974.81	2147.51
2030			5.	Liver cancer		9631.59	9336.73	9735.46		6658.45	2973.13		52.8073	42.0847	5374.9	2535.35	1626.44
2030			6.	Pancreas cancer		2395.53	2344.78	2381.71		1307	1088.53		0.419659	2.3934	992.686	695.189	704.839
2030			7.	Trachea, bronchus, lung cancers		18988.4	18381.9	20028.6		13126	5862.41		0.00249078	0.0123041	8004.21	6636.04	4348.16
2030			8.	Melanoma and other skin cancers		817.513	793.367	820.562		440.791	376.722		2.9143	6.58266	415.486	188.159	204.37
2030			9.	Breast cancer		8088.51	7618.07	8247.38		23.2025	8065.31		1.00861	3.8677	5094.61	1740.64	1248.39
2030			10.	Cervix uteri cancer		5198.98	4815.27	5263.45		0	5198.98		0.470819	3.07234	3246.44	1258.71	690.285
2030			11.	Corpus uteri cancer		1491.8	1480.56	1417.17		0	1491.8		22.8623	49.1714	786.638	356.74	276.388
2030			12.	Ovary cancer		2071.03	1916.16	2093.97		0	2071.03		3.1375	31.4888	1181.43	483.268	371.701
2030			13.	Prostate cancer		2523.6	2565.23	2425.23		2523.6	0		0.886241	1.91711	347.443	779.45	1393.9
2030			14.	Bladder cancer		2227.06	2181.5	2187.55		1459.43	767.632		29.9437	11.669	756.581	629.624	799.244
2030			15.	Lymphomas, multiple myeloma		5936.57	5633.23	6028.01		3074.67	2861.89		226.504	596.835	3090.18	1061.09	961.953
2030			16.	Leukaemia		4905.99	4697.76	5034.23		2724.18	2181.81		450.981	677.834	2672.68	571.7	532.795
2030		B.	Other neoplasms			2328.64	2244.43	2362.4		1187.3	1141.34		148.369	176.871	1237.05	361.268	405.082
2030		C.	Diabetes mellitus			29715.2	25329.8	33543.1		12501.7	17213.5		77.0188	131.989	17118.1	6494.31	5893.81
2030		D.	Endocrine disorders			6960.49	6051.25	8000.12		3197.64	3762.85		1157.08	335.977	3727.19	782.096	958.15
2030		E.	Neuropsychiatric conditions			229403	230398	229270		106662	122741		9166.95	16394.8	174705	12437	16699.2
2030			1.	Unipolar depressive disorders		87821	88936.9	86593.4		33132.7	54688.3		0.460186	6219.03	74956.1	5355.1	1290.36
2030			2.	Bipolar disorder		15037.8	14928.9	15413.5		7547.47	7490.37		0.21174	683.118	14338.1	14.3543	2.06717
2030			3.	Schizophrenia		17848.9	17766.8	18180.9		8827.32	9021.61		0.793862	1453.59	16225.6	106.586	62.3598
2030			4.	Epilepsy		7441.54	6897.51	8207.65		3981.76	3459.78		664.827	1491.45	4859.06	263.586	162.611
2030			5.	Alcohol use disorders		21249.6	21381.2	21174.3		18048.8	3200.78		1.78172	238.899	20364.3	516.942	127.698
2030			6.	Alzheimer and other dementias		18394.3	18924	17737.1		6477.22	11917		437.649	217.694	1420.87	3848.41	12469.6
2030			7.	Parkinson disease		2015.07	1935.92	2135.52		990.435	1024.63		7.00542	5.33525	644.426	490.111	868.188
2030			8.	Multiple sclerosis		1648.3	1647.33	1656.46		704.099	944.204		1.07739	159.164	1418.56	44.0956	25.4109
2030			9.	Drug use disorders		9091.71	9081.35	9241.22		7143.34	1948.37		0.553705	186.259	8861.14	36.814	6.95002
2030			10.	Post-traumatic stress disorder		4168.87	4220.72	4116.17		1122.85	3046.02		0.0182758	62.1261	4063.03	26.0954	17.6044
2030			11.	Obsessive-compulsive disorder		6120.8	6195.57	6077.08		2582.39	3538.41		0	776.797	5222.33	91.8235	29.848
2030			12.	Panic disorder		7593.61	7613.05	7628.13		2538.3	5055.31		0	230.392	7297.64	39.6382	25.9479
2030			13.	Insomnia (primary)		4777.37	4851.95	4699.77		2016.37	2761		0	88.5274	3932.53	533.977	222.329
2030			14.	Migraine		7596.09	7571.97	7691.26		2065.11	5530.98		232.349	3063.28	4299.43	0.908334	0.118325
2030		F.	Sense organ diseases			106120	119306	115460		47836.2	58283.4		65.3457	357.515	69858.6	23354.5	12483.7
2030			1.	Glaucoma		6926.85	7126.32	6744.61		2878.15	4048.7		15.6037	93.0578	4479.67	1511.15	827.374
2030			2.	Cataracts		38325.9	49017	46265.9		16939.9	21386		32.8091	196.244	25121.6	8162.33	4812.91
2030			3.	Vision disorders, age-related		22138.8	24348.2	23231.1		9238.46	12900.3		13.7947	65.4948	12980.1	5723.74	3355.66
2030			4.	Hearing loss, adult onset		38687.7	38777.7	39174		18759.6	19928.1		0	0	27260.2	7952	3475.44
2030		G.	Cardiovascular diseases			176999	161123	198794		90802.6	86196.7		2473.79	1109.25	66918.1	43750.9	62747.3
2030			1.	Rheumatic heart disease		5214.7	4487.64	6584.27		2423.51	2791.18		360.681	226.481	3129.65	769.835	728.05
2030			2.	Hypertensive heart disease		9561.09	8739.09	11117.8		4818.07	4743.02		46.367	32.9785	3192.24	2331.8	3957.71
2030			3.	Ischaemic heart disease		71782.5	66016.7	80548.7		39406	32376.5		151.286	285.252	28839	19205.8	23301.1
2030			4.	Cerebrovascular disease		60864.1	54809.4	66226.5		29731.6	31132.4		368.158	206.496	19184.7	16733.8	24370.9
2030			5.	Inflammatory heart diseases		6077.77	5470.51	7196.09		3418.6	2659.17		451.526	98.6573	3140.5	969.519	1417.58
2030		H.	Respiratory diseases			81093.8	71718	92893.6		45721.2	35372.7		3734.38	5165.15	37112.4	15080.1	20001.7
2030			1.	Chronic obstructive pulmonary disease		48369	41767.2	57361.6		27604.3	20764.8		94.4978	34.9327	20207	11985.7	16046.9
2030			2.	Asthma		17782.6	17273	18359.1		9694.77	8087.79		1896.61	4594.64	10082.5	661.567	547.216
2030		I.	Digestive diseases			40855	32776	52156.8		23338.9	17516		2083.8	1032.56	25324	6079.42	6335.23
2030			1.	Peptic ulcer disease		4347.03	3655.99	5512.53		2849.84	1497.19		74.4251	50.0761	2883.95	668.454	670.128
2030			2.	Cirrhosis of the liver		12148.4	9627.75	16048.1		7958.98	4189.38		396.95	196.556	8196.35	1993.42	1365.08
2030		J.	Genitourinary diseases			17480.2	16172.9	19468		10741.4	6738.82		437.521	362.636	10132.6	3134.51	3413.02
2030			1.	Nephritis and nephrosis		8973.87	8064.13	10350.2		4865.29	4108.58		314.095	302.92	4485.62	1887.55	1983.68
2030			2.	Benign prostatic hypertrophy		3993.73	4107.35	3882.2		3993.73	0		0	0	3294.51	397.947	301.276
2030		K.	Skin diseases			5291.84	5341.54	5256.59		2529.21	2762.63		402.658	470.742	3298.74	497.34	622.363
2030		L.	Musculoskeletal diseases			39965.7	39875.3	40794.8		16198.9	23766.8		219.73	1365.87	27556.2	6736.7	4087.16
2030			1.	Rheumatoid arthritis		6302.61	6302.47	6376.66		1745.83	4556.78		35.4315	382.976	4510.34	886.157	487.704
2030			2.	Osteoarthritis		21324.2	21394.4	21566.1		7882.53	13441.7		0.231447	10.4374	14354.6	4584.6	2374.36
2030		M.	Congenital anomalies			18852.1	16392.2	21552.9		9930.22	8921.91		17544.9	435.14	804.981	35.9452	31.1918
2030		N.	Oral conditions			10222.8	10420.6	10002.3		4763.33	5459.48		815.357	1415.19	5439.68	2002.04	550.536
2030	III.	Injuries				209575	216326	226211		142046	67528.9		15347.7	29131.1	151034	8230.18	5831.62
2030		A.	Unintentional injuries			145799	156391	157935		93692	52106.5		14615.3	25995.9	94406.9	6049.36	4731.07
2030			1.	Road traffic accidents		65225.2	66846	55048.6		45747.7	19477.6		3775.88	12045.3	46612.7	1846.38	944.978
2030			2.	Poisonings		6255.71	5874.42	7842.92		3763.53	2492.17		461.404	579.972	4294.12	665.385	254.829
2030			3.	Falls		14297.3	15685.3	17432.1		8356.58	5940.71		1498.14	2806.32	7211.51	1081.13	1700.19
2030			4.	Fires		10901.8	11437.4	12780.5		4542.35	6359.49		2171.43	2204.62	5972.96	297.441	255.392
2030			5.	Drownings		7882.24	7051.11	9986.43		5654.23	2228.01		1343.22	1597.66	4470.69	264.632	206.037
2030			6.	Other unintentional injuries		41236.2	49496.7	54844.9		25627.6	15608.6		5365.25	6762.05	25844.9	1894.39	1369.64
2030		B.	Intentional injuries			63776.1	59935	68275.9		48353.7	15422.3		732.341	3135.22	56627.1	2180.82	1100.55
2030			1.	Self-inflicted injuries		23461.9	23777	24939.6		14284.4	9177.55		4.69036	856.638	20341.4	1454.89	804.306
2030			2.	Violence		28797.2	27791.2	31826.3		23806	4991.28		569.292	1752.58	25728.7	517.739	228.959
2030			3.	War		11067.5	7904.09	11027.7		9893	1174.5		125.613	501.616	10193.7	189.188	57.4326

## Sheet: East Asia and Pacific
DALYs by cause, scenario, sex and age for the years 2002, 2015 and 2030
Source: Mathers CD, Loncar D (2006). Projections of global mortality and burden of disease from 2002 to 2030.
East Asia and Pacific
						Total DALYs ('000)				Baseline DALYs ('000)			Baseline projections ('000) by age group
Year		Cause				Baseline	Optimistic	Pessimistic		Male	Female		0-4	5-14	15-59	60-69	70+
2002	Population (millions)					1866.12	1866.12	1866.12		950.425	915.694		152.932	331.794	1204.2	104.294	72.8992
2002		All Causes				321215	321215	321215		171129	150086		61616.1	19601.1	177286	33731.7	28979.7
2002	I.	Communicable, maternal, perinatal and nutritional conditions				80385.2	80385.2	80385.2		40415	39970.2		42905.4	5503.97	27532.8	2443.7	1999.32
2002		A.	Infectious and parasitic diseases			38230.6	38230.6	38230.6		22261.4	15969.2		13619.8	2975.61	18841.7	1722.08	1071.4
2002			1.	Tuberculosis		9411.89	9411.89	9411.89		5913.72	3498.17		130.093	256.786	7210.73	1189.5	624.784
2002			2.	STDs excluding HIV		1116.17	1116.17	1116.17		307.293	808.872		127.569	15.3264	948.487	15.3083	9.47513
2002			3.	HIV/AIDS		4448.24	4448.24	4448.24		3511.25	936.994		174.481	48.8541	4200.89	22.1026	1.91376
2002			4.	Diarrhoeal diseases		8995.22	8995.22	8995.22		4703.34	4291.88		6921.51	371.759	1512.01	109.145	80.7988
2002			5.	Childhood-cluster diseases		3856.77	3856.77	3856.77		1926.32	1930.45		2985.06	640.196	229.754	1.14995	0.618759
2002				a.	Pertussis	673.213	673.213	673.213		333.784	339.429		649.956	23.257	0	0	0
2002				d.	Measles	2443.99	2443.99	2443.99		1219.03	1224.96		1702.21	586.916	154.865	0	0
2002				e.	Tetanus	668.41	668.41	668.41		333.225	335.184		615.191	20.9434	30.5168	1.14004	0.618535
2002			6.	Meningitis		1131.38	1131.38	1131.38		569.73	561.648		609.413	101.416	386.487	20.0434	14.0182
2002			7.	Hepatitis B and C		919.989	919.989	919.989		749.282	170.707		46.6516	5.787	792.896	57.4938	17.1615
2002			8.	Malaria		1266.91	1266.91	1266.91		807.757	459.149		914.939	140.544	195.371	10.1831	5.86953
2002			9.	Tropical-cluster diseases		547.332	547.332	547.332		384.661	162.672		16.5132	86.1541	426.33	14.1468	4.18831
2002			10.	Leprosy		30.357	30.357	30.357		21.9586	8.3984		0.612707	3.57862	17.5875	5.514	3.06419
2002			11.	Dengue		243.954	243.954	243.954		103.24	140.714		70.862	131.338	38.1656	2.07523	1.51333
2002			12.	Japanese encephalitis		362.096	362.096	362.096		186.938	175.158		155.212	128.759	75.9449	1.4453	0.734606
2002			13.	Trachoma		410.905	410.905	410.905		96.7133	314.192		0.201097	0.665201	255.754	87.3111	66.9733
2002			14.	Intestinal nematode infections		1346.7	1346.7	1346.7		686.21	660.493		170.508	682.152	460.001	22.6962	11.3456
2002		B.	Respiratory infections			11558.1	11558.1	11558.1		4979.69	6578.4		6433.71	1540.2	2140.77	591.57	851.839
2002		C.	Maternal conditions			4397.27	4397.27	4397.27		0	4397.27		0	8.08629	4389.18	0	0
2002		D.	Perinatal conditions			19738.9	19738.9	19738.9		10236.9	9501.97		19738.8	0.058013	0	0	0
2002		E.	Nutritional deficiencies			6460.3	6460.3	6460.3		2936.9	3523.4		3113.07	980.011	2161.09	130.045	76.0786
			1.	Protein-energy malnutrition		2828.65	2828.65	2828.65		1507.32	1321.33		2608.33	62.3399	116.419	21.1071	20.4549
			2.	Iodine deficiency		311.895	311.895	311.895		154.585	157.309		224.246	87.4037	0.195212	0.0485846	0.000811841
			3.	Vitamin A deficiency		9.01704	9.01704	9.01704		6.34793	2.66911		2.57261	5.21759	1.22684	0	0
			4.	Iron-deficiency anaemia		3217.45	3217.45	3217.45		1223.07	1994.39		247.438	820.653	2018.83	97.3967	33.1305
2002	II.	Noncommunicable diseases				196914	196914	196914		103172	93741.6		14951.9	7454.17	118464	29879.1	26164.5
2002		A.	Malignant neoplasms			24959.8	24959.8	24959.8		14446.1	10513.7		393.03	555.338	15080.7	5532.59	3398.18
2002			1.	Mouth and oropharynx cancers		843.914	843.914	843.914		599.487	244.427		1.79441	2.47652	591.752	163.314	84.5769
2002			2.	Oesophagus cancer		2308.47	2308.47	2308.47		1487.97	820.501		0.00286897	0.00515447	1192	706.085	410.384
2002			3.	Stomach cancer		4532.62	4532.62	4532.62		2891.01	1641.61		0.967429	2.4691	2639.87	1100.83	788.492
2002			4.	Colon and rectum cancers		1760.72	1760.72	1760.72		930.861	829.855		0.196889	0.970388	1060.88	416.538	282.13
2002			5.	Liver cancer		4663.3	4663.3	4663.3		3424.87	1238.43		27.677	15.8729	3233.76	925.128	460.854
2002			6.	Pancreas cancer		407.562	407.562	407.562		243.267	164.295		0.37467	2.34911	251.332	91.6489	61.8566
2002			7.	Trachea, bronchus, lung cancers		3848.23	3848.23	3848.23		2567.09	1281.14		5.87068	32.5754	1911.73	1196.42	701.639
2002			8.	Melanoma and other skin cancers		49.7484	49.7484	49.7484		24.449	25.2994		0.263195	0.420442	29.3107	11.8412	7.91279
2002			9.	Breast cancer		1411.7	1411.7	1411.7		0.598988	1411.1		0.279715	0.0006	1123.84	194.151	93.4224
2002			10.	Cervix uteri cancer		621.329	621.329	621.329		0	621.329		0.297987	0.00332976	421.711	126.468	72.8484
2002			11.	Corpus uteri cancer		140.966	140.966	140.966		0	140.966		0.0153143	0.0316697	103.396	24.9187	12.604
2002			12.	Ovary cancer		380.294	380.294	380.294		0	380.294		0.625249	5.55686	284.861	57.6912	31.5593
2002			13.	Prostate cancer		104.057	104.057	104.057		104.057	0		0.000305233	0.000337758	16.9135	38.0466	49.0962
2002			14.	Bladder cancer		231.298	231.298	231.298		166.38	64.9182		0.628048	0.670634	73.0763	75.5632	81.3602
2002			15.	Lymphomas, multiple myeloma		671.571	671.571	671.571		417.378	254.193		23.4359	73.2789	447.768	77.9314	49.1563
2002			16.	Leukaemia		1659.61	1659.61	1659.61		924.892	734.716		207.826	342.2	963.36	90.0739	56.1484
2002		B.	Other neoplasms			304.734	304.734	304.734		146.05	158.684		34.0411	27.6382	182.246	35.7527	25.0568
2002		C.	Diabetes mellitus			4016.46	4016.46	4016.46		1813.16	2203.31		13.591	37.9672	2551.42	837.496	575.984
2002		D.	Endocrine disorders			1797.42	1797.42	1797.42		720.888	1076.53		711.96	128.714	795.859	82.6655	78.218
2002		E.	Neuropsychiatric conditions			50919.3	50919.3	50919.3		25459	25460.3		3482.47	3755.19	39871.6	1919.53	1890.55
2002			1.	Unipolar depressive disorders		17823.1	17823.1	17823.1		7808.55	10014.5		0.00104353	1603.72	15225.9	820.647	172.801
2002			2.	Bipolar disorder		4413.53	4413.53	4413.53		2192.13	2221.41		0.257242	209.229	4201.38	2.45283	0.217202
2002			3.	Schizophrenia		5415.54	5415.54	5415.54		2854.8	2560.73		0.103293	645.107	4741.92	19.3532	9.05846
2002			4.	Epilepsy		1497.75	1497.75	1497.75		797.911	699.836		119.738	293.225	1030.99	36.0862	17.7112
2002			5.	Alcohol use disorders		5824.92	5824.92	5824.92		5130.7	694.228		0.217747	71.437	5659.17	81.3411	12.753
2002			6.	Alzheimer and other dementias		2719	2719	2719		1138.45	1580.55		140.517	71.7431	411.388	690.485	1404.87
2002			7.	Parkinson disease		299.177	299.177	299.177		146.265	152.912		1.03368	0.230194	120.045	68.1514	109.717
2002			8.	Multiple sclerosis		411.041	411.041	411.041		172.305	238.736		0.119131	53.5519	353.103	3.11836	1.14841
2002			9.	Drug use disorders		548.361	548.361	548.361		440.519	107.842		0.00902377	35.5698	510.893	1.55329	0.335948
2002			10.	Post-traumatic stress disorder		1042.94	1042.94	1042.94		286.738	756.203		0.000173231	17.2774	1019.19	4.23607	2.23667
2002			11.	Obsessive-compulsive disorder		938.927	938.927	938.927		380.293	558.634		0	19.3105	912.606	6.04518	0.965084
2002			12.	Panic disorder		2054.19	2054.19	2054.19		693.236	1360.96		0	67.5414	1976.1	6.65253	3.90462
2002			13.	Insomnia (primary)		712.44	712.44	712.44		218.383	494.057		0	30.6593	599.119	58.432	24.2301
2002			14.	Migraine		2151.5	2151.5	2151.5		539.678	1611.83		31.4177	451.201	1668.68	0.181981	0.0201495
2002		F.	Sense organ diseases			23544.2	23544.2	23544.2		11363.6	12180.5		1.65276	39.617	16359.4	5004.94	2138.53
2002			1.	Glaucoma		1403.54	1403.54	1403.54		637.518	766.019		0.137139	5.30565	909.886	336.201	152.007
2002			2.	Cataracts		7841.92	7841.92	7841.92		3536.56	4305.36		0.309503	2.50432	4802.5	2109.08	927.525
2002			3.	Vision disorders, age-related		6527.98	6527.98	6527.98		2978.98	3549.01		0.0744639	30.5189	4541.55	1333.12	622.73
2002			4.	Hearing loss, adult onset		7762.92	7762.92	7762.92		4206.78	3556.14		0	0	6101.15	1226.1	435.673
2002		G.	Cardiovascular diseases			37704.2	37704.2	37704.2		20393.4	17310.8		400.756	432.76	16728.6	9409.27	10732.8
2002			1.	Rheumatic heart disease		1930.67	1930.67	1930.67		787.835	1142.83		49.6862	87.6023	1302.76	288.248	202.374
2002			2.	Hypertensive heart disease		2897.25	2897.25	2897.25		1559.65	1337.6		10.4524	7.78698	1175.65	810.149	893.207
2002			3.	Ischaemic heart disease		10235.4	10235.4	10235.4		5771.72	4463.66		41.696	143.006	4827.39	2539.56	2683.73
2002			4.	Cerebrovascular disease		17841.5	17841.5	17841.5		9865.78	7975.74		89.0574	52.9979	6969.83	5007.99	5721.66
2002			5.	Inflammatory heart diseases		884.107	884.107	884.107		476.624	407.482		43.2523	23.8022	429.708	153.894	233.45
2002		H.	Respiratory diseases			17527.3	17527.3	17527.3		9669.72	7857.63		832.902	1069.05	6970.9	3491.28	5163.21
2002			1.	Chronic obstructive pulmonary disease		11545.1	11545.1	11545.1		6397.24	5147.88		12.5243	2.63639	3922.96	3012.59	4594.41
2002			2.	Asthma		3671.9	3671.9	3671.9		1988.23	1683.67		442.648	962.961	2093.3	114.544	58.4498
2002		I.	Digestive diseases			12075.4	12075.4	12075.4		7032.49	5042.9		2353.95	318.982	7018.44	1304.72	1079.3
2002			1.	Peptic ulcer disease		1597.51	1597.51	1597.51		1007.87	589.646		71.7132	26.8834	1111.84	225.745	161.332
2002			2.	Cirrhosis of the liver		3355.98	3355.98	3355.98		2190.69	1165.29		96.6429	54.7044	2456.68	471.864	276.092
2002		J.	Genitourinary diseases			4558.76	4558.76	4558.76		2655.37	1903.39		149.392	211.51	3077.86	644.498	475.5
2002			1.	Nephritis and nephrosis		2591.82	2591.82	2591.82		1367.56	1224.26		99.7405	172.538	1649.09	390.557	279.892
2002			2.	Benign prostatic hypertrophy		836.343	836.343	836.343		836.343	0		0	0	726.189	65.5351	44.6188
2002		K.	Skin diseases			996.271	996.271	996.271		455.715	540.556		85.3746	127.159	674.71	61.1426	47.8859
2002		L.	Musculoskeletal diseases			9911.92	9911.92	9911.92		4557.45	5354.47		61.583	329.289	7818.57	1221.48	480.997
2002			1.	Rheumatoid arthritis		1203.14	1203.14	1203.14		371.474	831.668		3.10846	53.125	916.378	164.813	65.7175
2002			2.	Osteoarthritis		5101.39	5101.39	5101.39		1908.65	3192.74		0.128228	2.52239	4083.61	796.547	218.588
2002		M.	Congenital anomalies			6712.99	6712.99	6712.99		3540.97	3172.02		6074.78	274.366	354.92	5.62376	3.2951
2002		N.	Oral conditions			1885.21	1885.21	1885.21		918.421	966.793		356.457	146.588	979.143	328.095	74.9303
2002	III.	Injuries				43915.4	43915.4	43915.4		27541.3	16374.2		3758.77	6642.99	31288.8	1408.96	815.886
2002		A.	Unintentional injuries			32851.5	32851.5	32851.5		20718.9	12132.6		3688.27	6057.22	21583.3	940.417	582.283
2002			1.	Road traffic accidents		10909.7	10909.7	10909.7		7765.21	3144.48		417.628	1184.13	8866.56	313.28	128.099
2002			2.	Poisonings		1744.37	1744.37	1744.37		1041.12	703.247		166.399	210.736	1212.06	107.426	47.7478
2002			3.	Falls		5014.83	5014.83	5014.83		3081.91	1932.91		529.296	1034.48	3025.39	201.69	223.972
2002			4.	Fires		1211.64	1211.64	1211.64		437.585	774.052		165.588	219.054	775.892	26.8693	24.2338
2002			5.	Drownings		4150.26	4150.26	4150.26		2702.62	1447.63		925.128	1597.56	1528.13	58.4627	40.9711
2002			6.	Other unintentional injuries		9820.74	9820.74	9820.74		5690.48	4130.26		1484.24	1811.25	6175.31	232.688	117.26
2002		B.	Intentional injuries			11063.9	11063.9	11063.9		6822.34	4241.57		70.4985	585.768	9705.5	468.541	233.603
2002			1.	Self-inflicted injuries		6911.6	6911.6	6911.6		3374.68	3536.92		0	318.573	5982.6	398.72	211.7
2002			2.	Violence		3407.37	3407.37	3407.37		2802.31	605.068		59.9674	219.749	3053.17	56.4232	18.0679
2002			3.	War		660.02	660.02	660.02		574.324	85.6965		8.46271	44.6793	592.223	11.5176	3.13746
2015	Population (millions)					2038.19	1892.21	1878.42		1019.14	1019.05		151.355	296.994	1331.81	156.57	101.459
2015		All Causes				310717	291947	341394		170490	140227		31937.8	12554.3	187076	42344.7	36803.9
2015	I.	Communicable, maternal, perinatal and nutritional conditions				50598.7	40998.4	65346.2		29488.7	21110		18756.9	2252.14	26480	1502.2	1607.4
2015		A.	Infectious and parasitic diseases			29963.6	24604.1	38660.5		19783.7	10179.9		4568.75	1269.45	22483.9	962.768	678.776
2015			1.	Tuberculosis		3181.17	2630.86	5044.34		1936.44	1244.74		37.1098	70.0572	2404.34	449.584	220.079
2015			2.	STDs excluding HIV		748.067	561.265	851.632		216.994	531.073		78.6806	8.95857	640.758	10.0339	9.63593
2015			3.	HIV/AIDS		16449.5	13669.3	18957.5		12330	4119.57		218.478	132.831	15959.1	129.993	9.08482
2015			4.	Diarrhoeal diseases		3361.52	3500.66	5307.77		1793.87	1567.64		2042.96	178.522	952.725	101.571	85.7416
2015			5.	Childhood-cluster diseases		1214.85	736.783	1725.72		625.458	589.388		893.919	230.825	88.6648	0.794469	0.641648
2015				a.	Pertussis	201.294	132.733	302.097		102.401	98.8924		178.037	23.257	0	0	0
2015				d.	Measles	794.085	464.528	1107.19		409.779	384.306		532.073	198.735	63.2768	0	0
2015				e.	Tetanus	198.425	121.418	292.223		101.127	97.2985		177.109	6.54649	13.3415	0.787196	0.641349
2015			6.	Meningitis		467.951	307.457	666.658		238.668	229.283		226.974	36.1337	177.307	13.2294	14.307
2015			7.	Hepatitis B and C		446.65	328.966	632.178		365.205	81.445		19.3086	2.19335	370.783	37.2649	17.1005
2015			8.	Malaria		534.767	335.215	727.317		335.703	199.064		357.263	56.9429	107.256	7.37744	5.92859
2015			9.	Tropical-cluster diseases		309.922	201.361	392.924		223.995	85.9261		8.14517	35.2126	252.835	9.61501	4.11387
2015			10.	Leprosy		20.2918	15.9195	23.7315		15.5683	4.72355		0.307173	1.74822	11.118	4.15991	2.95849
2015			11.	Dengue		100.576	54.5418	127.803		43.8623	56.7136		25.8118	52.9698	18.4632	1.529	1.80203
2015			12.	Japanese encephalitis		110.713	82.7026	172.279		58.9004	51.8129		42.8458	34.2602	31.9163	1.00757	0.683433
2015			13.	Trachoma		243.303	207.132	320.493		56.7307	186.572		0.077933	0.176779	119.831	64.6569	58.5602
2015			14.	Intestinal nematode infections		676.737	511.416	876.857		355.797	320.94		86.8033	293.143	265.564	19.613	11.6138
2015		B.	Respiratory infections			4862.31	3627.47	6629.34		2460.21	2402.11		1662.38	539.435	1357.28	446.018	857.203
2015		C.	Maternal conditions			1473.13	1107.57	2247.9		0	1473.13		0	8.08629	1465.05	0	0
2015		D.	Perinatal conditions			10937	9086.2	13540.7		5664.94	5272.04		10937	0.0224764	0	0	0
2015		E.	Nutritional deficiencies			3362.64	2573.04	4267.69		1579.89	1782.76		1588.82	435.145	1173.85	93.4143	71.4167
2015			1.	Protein-energy malnutrition		1416.63	1094.74	1781.64		755.396	661.234		1303.22	24.9671	57.4335	11.2084	19.8012
2015			2.	Iodine deficiency		187.099	137.104	224.747		94.154	92.9447		143.493	43.4598	0.11481	0.0301962	0.000965018
2015			3.	Vitamin A deficiency		4.12201	2.86008	5.7118		3.01108	1.11093		1.21342	2.09502	0.813577	0	0
2015			4.	Iron-deficiency anaemia		1695.68	1295.59	2178.83		699.261	996.419		126.141	362.77	1099.55	75.2922	31.9249
2015	II.	Noncommunicable diseases				218157	210601	230027		114444	103714		10505	5986.57	128793	38815.2	34057.6
2015		A.	Malignant neoplasms			31845.9	31328.5	31924.9		18702.4	13143.5		348.674	424.032	18094.6	8142.46	4836.15
2015			1.	Mouth and oropharynx cancers		1053.85	1027.62	1069.67		736.876	316.976		1.94916	2.36129	703.586	227.183	118.774
2015			2.	Oesophagus cancer		2976.68	2942.96	2959.9		1883.88	1092.8		0.00329602	0.00484701	1424.38	1005.44	546.849
2015			3.	Stomach cancer		5686.63	5609.49	5676.81		3658.03	2028.6		0.853809	2.16266	3049.94	1554.97	1078.71
2015			4.	Colon and rectum cancers		2216.53	2196.85	2196.35		1179.2	1037.33		0.217137	1.05005	1228.98	578.994	407.285
2015			5.	Liver cancer		5643.6	5541.74	5703.58		4152.75	1490.85		24.2994	12.3715	3688.25	1295.27	623.417
2015			6.	Pancreas cancer		510.297	502.898	511.271		308.819	201.478		0.332698	1.86831	295.377	125.728	86.9907
2015			7.	Trachea, bronchus, lung cancers		6149.72	6032.97	6134.24		4201.86	1947.86		2.71972e-05	0.000911956	2987.81	2055.87	1106.04
2015			8.	Melanoma and other skin cancers		61.3969	60.5093	61.8654		31.4987	29.8982		0.248755	0.350142	33.4514	15.7102	11.6365
2015			9.	Breast cancer		1703.05	1673.21	1718.82		0.80455	1702.25		0.294927	0.000685782	1300.52	272.793	129.447
2015			10.	Cervix uteri cancer		786.743	767.289	788.424		0	786.743		0.316067	0.00381252	504.493	182.941	98.9884
2015			11.	Corpus uteri cancer		194.057	198.986	189.09		0	194.057		0.026493	0.0422865	138.495	37.0392	18.4534
2015			12.	Ovary cancer		443.194	432.856	445.721		0	443.194		0.656261	5.35833	315.736	78.2649	43.1784
2015			13.	Prostate cancer		149.994	154.304	146.625		149.994	0		0.000437885	0.000412383	23.4322	49.9634	76.5977
2015			14.	Bladder cancer		316.51	316.391	309.316		229.476	87.0337		0.712756	0.578925	92.9879	103.855	118.375
2015			15.	Lymphomas, multiple myeloma		751.481	734.968	761.686		463.577	287.904		22.2316	61.3871	493.402	103.001	71.4589
2015			16.	Leukaemia		1611.44	1578.55	1644.3		894.816	716.625		184.458	271.485	949.763	125.988	79.7469
2015		B.	Other neoplasms			341.954	335.165	346.686		159.592	182.362		29.8158	21.2895	205.444	50.6011	34.8043
2015		C.	Diabetes mellitus			6023.89	5289.53	6584.6		2547.5	3476.39		10.5	25.517	3814.52	1276.41	896.946
2015		D.	Endocrine disorders			1383.1	1230.42	1562.84		573.055	810.046		377.591	79.8633	720.221	101.198	104.227
2015		E.	Neuropsychiatric conditions			53404.9	53163.4	53699.3		26079.3	27325.6		2730.29	3309.68	41860.5	2844.16	2660.19
2015			1.	Unipolar depressive disorders		19986.1	20022.8	19923.2		8405.92	11580.1		0.000853402	1444.29	17046.5	1261.73	233.563
2015			2.	Bipolar disorder		4187.01	4128.65	4293.7		2080.24	2106.77		0.180939	173.597	4009.5	3.48225	0.251264
2015			3.	Schizophrenia		5255.61	5191.07	5357.69		2735.91	2519.7		0.077442	568.322	4649.22	26.2692	11.7198
2015			4.	Epilepsy		1341.75	1264.07	1434.63		713.207	628.541		88.6993	231.607	952.999	46.1849	22.258
2015			5.	Alcohol use disorders		6014.44	6013.12	6008.66		5299.49	714.95		0.178074	63.6245	5822.78	112.146	15.7107
2015			6.	Alzheimer and other dementias		3739.77	3765.98	3700.21		1513.97	2225.8		133.785	62.7538	492.903	1031.73	2018.6
2015			7.	Parkinson disease		356.24	344.465	376.219		174.366	181.874		0.756147	0.172986	138.367	85.0197	131.924
2015			8.	Multiple sclerosis		416.288	415.843	417.086		174.808	241.48		0.0827045	47.7073	363.072	3.92577	1.49999
2015			9.	Drug use disorders		603.989	591.429	611.76		486.507	117.482		0.00737965	33.0848	568.285	2.1656	0.445682
2015			10.	Post-traumatic stress disorder		1110.93	1112.34	1108.75		303.866	807.068		0.000141668	15.466	1085.72	6.67357	3.07676
2015			11.	Obsessive-compulsive disorder		971.968	969.073	976.885		390.174	581.794		0	17.0397	944.704	8.97696	1.24724
2015			12.	Panic disorder		2046.64	2033.02	2070.08		689.591	1357.05		0	58.58	1973.1	9.92712	5.0403
2015			13.	Insomnia (primary)		819.466	821.675	816.571		245.544	573.922		0	27.2371	667.78	90.0455	34.403
2015			14.	Migraine		2054.26	2033.16	2091.43		525.914	1528.35		30.1685	405.754	1618.05	0.266695	0.0250471
2015		F.	Sense organ diseases			28815.2	30773	30749.8		13669.6	15145.6		1.15685	31.4063	19159.2	6747.18	2876.32
2015			1.	Glaucoma		1919.18	1928.45	1905.24		828.775	1090.4		0.0922342	5.25002	1195.66	508.614	209.564
2015			2.	Cataracts		9436.05	11072.3	10913.6		4334.47	5101.58		0.216726	1.6388	5580.83	2588.25	1265.12
2015			3.	Vision disorders, age-related		8186.45	8595.28	8498.43		3632.6	4553.85		0.0665204	23.5931	5400.36	1923.61	838.821
2015			4.	Hearing loss, adult onset		9265.73	9170.12	9424.22		4869.74	4396		0	0	6977.62	1726.16	561.958
2015		G.	Cardiovascular diseases			39600.2	36064.3	43442.4		21767.2	17833		335.77	251.599	16102.9	10229	12681
2015			1.	Rheumatic heart disease		1593.25	1431.56	1902.41		690.222	903.026		40.8595	43.8501	971.592	312.719	224.227
2015			2.	Hypertensive heart disease		3019.44	2740.73	3377.89		1714.32	1305.12		8.89742	4.84766	1099.69	815.095	1090.91
2015			3.	Ischaemic heart disease		11004.2	9940.03	11952		6233.17	4770.98		36.9542	97.4842	4905.25	2794.1	3170.37
2015			4.	Cerebrovascular disease		19241.2	17671.2	20916.8		10717.2	8524		76.5093	32.33	6948.53	5500.35	6683.46
2015			5.	Inflammatory heart diseases		861.616	791.805	972.334		465.505	396.111		35.4348	11.4608	377.018	162.813	274.89
2015		H.	Respiratory diseases			22548.3	20598.6	24224.9		12901.4	9646.93		719.931	923.927	8715.29	4895.71	7293.44
2015			1.	Chronic obstructive pulmonary disease		16237.2	14730.4	17576.2		9383.04	6854.15		9.98506	2.02494	5465.3	4265.69	6494.2
2015			2.	Asthma		3716.36	3573.68	3813.87		2037.41	1678.95		426.148	851.133	2194.43	154.426	90.2224
2015		I.	Digestive diseases			10000.1	8493.73	12026.1		6064.28	3935.86		1037.65	128.786	6161.92	1417.35	1254.43
2015			1.	Peptic ulcer disease		1475.99	1287.31	1739.31		957.163	518.829		39.7488	10.6475	975.324	255.473	194.799
2015			2.	Cirrhosis of the liver		3006.77	2564.09	3659.41		2017.29	989.474		59.9044	25.3963	2141.15	483.683	296.638
2015		J.	Genitourinary diseases			4568.52	4251.91	4982.71		2892.39	1676.12		77.9915	95.3549	2996.35	790.149	608.675
2015			1.	Nephritis and nephrosis		2348.85	2127.05	2644.79		1287.56	1061.29		51.5766	77.197	1389.91	472.758	357.401
2015			2.	Benign prostatic hypertrophy		1150.34	1153.82	1143.62		1150.34	0		0	0	1000.86	89.1813	60.2996
2015		K.	Skin diseases			1116.24	1106.66	1118.8		497.822	618.42		77.9021	114.552	763.458	86.9538	73.3747
2015		L.	Musculoskeletal diseases			11390.3	11229.9	11704.5		4949.54	6440.77		52.5137	288.414	8676.99	1741.81	630.578
2015			1.	Rheumatoid arthritis		1431.65	1421.57	1457.36		422.128	1009.52		2.92307	45.1061	1059.27	238.835	85.5176
2015			2.	Osteoarthritis		6257.06	6199.5	6368.08		2323.04	3934.02		0.083407	2.1244	4834.36	1143.82	276.677
2015		M.	Congenital anomalies			4804.49	4412.3	5358.22		2546.16	2258.33		4353.68	159.614	280.113	6.94018	4.14389
2015		N.	Oral conditions			2314.04	2323.52	2301.58		1093.32	1220.72		351.503	132.532	1241.43	485.212	103.366
2015	III.	Injuries				41960.9	40347.9	46020.3		26557.3	15403.6		2675.94	4315.55	31803.2	2027.37	1138.87
2015		A.	Unintentional injuries			30211.3	29253.2	33421.4		19139	11072.3		2606.18	3833.72	21619.7	1323.23	828.528
2015			1.	Road traffic accidents		13775.4	12844.9	12993.5		9672.31	4103.09		446.776	1111.81	11534	491.027	191.809
2015			2.	Poisonings		1360.66	1243.48	1687.89		799.326	561.336		97.7893	121.969	946.491	131.672	62.7398
2015			3.	Falls		4219.92	4301.14	4962.57		2539.28	1680.63		384.599	647.949	2585.72	282.018	319.635
2015			4.	Fires		1044.23	969.999	1178.35		365.812	678.419		120.634	160.628	694.506	34.5611	33.9014
2015			5.	Drownings		2587.52	2292.96	3258.84		1679.54	907.975		595.887	761.592	1096.42	76.9804	56.6402
2015			6.	Other unintentional injuries		7223.59	7600.63	9340.29		4082.77	3140.82		960.492	1029.77	4762.55	306.971	163.802
2015		B.	Intentional injuries			11749.6	11094.8	12598.9		7418.26	4331.31		69.7669	481.833	10183.5	704.138	310.338
2015			1.	Self-inflicted injuries		7186.51	6976.53	7666.69		3575.78	3610.73		0	247.298	6054.86	606.294	278.061
2015			2.	Violence		3705.47	3369.67	4068.88		3098.35	607.115		59.486	187.868	3352.47	79.4251	26.2232
2015			3.	War		768.218	664.715	765.448		668.707	99.5119		8.21486	44.1441	694.993	15.7906	5.07577
2030	Population (millions)					2138.75	2033.93	1969.74		1039.48	1099.26		133.617	285.309	1310.72	238.589	170.513
2030		All Causes				316507	289059	360547		170489	146018		16964	9676.78	177354	56419.1	56093.1
2030	I.	Communicable, maternal, perinatal and nutritional conditions				40999.5	25846.9	54453		25174.4	15825.1		8388.29	1279.98	28159.2	1542.29	1629.71
2030		A.	Infectious and parasitic diseases			30497.2	18700.2	37381.6		19986.8	10510.4		1781.69	832.751	26171.4	1065.79	645.621
2030			1.	Tuberculosis		1078.94	635.22	2759.86		645.562	433.379		9.85659	20.0091	756.221	192.63	100.224
2030			2.	STDs excluding HIV		485.214	303.443	651.739		151.69	333.523		45.2038	5.3808	415.585	8.67693	10.3674
2030			3.	HIV/AIDS		24273.7	13536.1	24641.2		16586.4	7687.38		262.976	318.87	23116.9	540.668	34.3665
2030			4.	Diarrhoeal diseases		1577.7	2493.05	3688.89		855.778	721.922		678.486	99.2611	592.812	101.76	105.381
2030			5.	Childhood-cluster diseases		389.158	175.655	842.497		209.947	179.212		261.185	93.3553	33.2812	0.612229	0.72417
2030				a.	Pertussis	74.5738	43.6753	153.927		39.3593	35.2144		51.3168	23.257	0	0	0
2030				d.	Measles	248.074	101.9	539.254		134.966	113.108		156.365	67.1812	24.5279	0	0
2030				e.	Tetanus	60.9897	26.2111	140.287		32.276	28.7137		51.0872	2.34231	6.2295	0.606895	0.723793
2030			6.	Meningitis		209.209	103.419	424.887		110.759	98.4499		87.3482	14.9216	80.7185	10.948	15.2727
2030			7.	Hepatitis B and C		231.456	139.007	437.29		189.273	42.183		8.39262	0.934687	175.58	28.1009	18.4481
2030			8.	Malaria		235.434	118.568	459.427		139.113	96.3208		133.773	27.4431	61.4732	6.18948	6.55485
2030			9.	Tropical-cluster diseases		169.922	90.5235	291.656		125.046	44.876		3.64589	14.6369	139.515	7.67202	4.45135
2030			10.	Leprosy		14.0433	9.70102	20.0461		11.5611	2.48227		0.131868	0.789271	6.31611	3.48222	3.32386
2030			11.	Dengue		37.9456	16.5303	69.8971		17.0043	20.9413		6.7962	19.7457	8.05573	1.18462	2.16331
2030			12.	Japanese encephalitis		42.2862	24.7439	92.1349		23.4329	18.8534		13.7112	12.2249	14.7985	0.819933	0.731774
2030			13.	Trachoma		173.764	130.159	262.299		38.2906	135.473		0.0310073	0.0667206	56.9099	50.968	65.7879
2030			14.	Intestinal nematode infections		377.419	240.348	621.939		203.97	173.449		44.1538	146.811	153.554	18.7342	14.1652
2030		B.	Respiratory infections			2814.81	1892.45	4505.78		1485.48	1329.33		461.348	231.006	816.164	396.454	909.837
2030		C.	Maternal conditions			548.444	452.845	1287.4		0	548.444		0	8.08629	540.358	0	0
2030		D.	Perinatal conditions			5358.15	3643.74	8413.76		2842.67	2515.48		5358.15	0.0078596	0	0	0
2030		E.	Nutritional deficiencies			1780.87	1157.58	2864.45		859.412	921.46		787.106	208.13	631.337	80.0492	74.25
2030			1.	Protein-energy malnutrition		701.015	461.265	1112.13		376.354	324.662		636.082	10.6818	28.4579	7.1704	18.6234
2030			2.	Iodine deficiency		105.134	63.1458	160.498		54.0963	51.0374		81.9246	23.1214	0.0645102	0.0221195	0.00111595
2030			3.	Vitamin A deficiency		1.99422	1.06173	3.88398		1.51221	0.48201		0.534878	0.978328	0.481011	0	0
2030			4.	Iron-deficiency anaemia		931.529	607.533	1520.28		409.241	522.288		62.0576	172.472	592.56	67.5946	36.8447
2030	II.	Noncommunicable diseases				236942	227513	259187		121500	115442		6917.51	5295.25	120114	52027.8	52586.9
2030		A.	Malignant neoplasms			37434.7	36368.6	37123.7		22007.9	15426.8		246.397	337.437	17140.5	11685.1	8025.28
2030			1.	Mouth and oropharynx cancers		1197.08	1148.93	1219.42		820.404	376.673		1.88545	2.17478	676.37	321.731	194.917
2030			2.	Oesophagus cancer		3443.31	3400.91	3331.47		2136.69	1306.61		0.00351406	0.00501022	1236.32	1332.81	874.162
2030			3.	Stomach cancer		6458.35	6346.57	6291.7		4097.51	2360.84		0.606033	1.73476	2663.01	2082.03	1710.97
2030			4.	Colon and rectum cancers		2551.37	2517.86	2469.62		1360.66	1190.71		0.199377	1.09439	1129.15	775.713	645.211
2030			5.	Liver cancer		6054.36	5895.48	6060.99		4391.87	1662.49		16.0842	9.50201	3277.25	1750.91	1000.61
2030			6.	Pancreas cancer		578.404	566.329	570.709		346.707	231.696		0.250077	1.54252	269.048	169.807	137.756
2030			7.	Trachea, bronchus, lung cancers		9007.73	8646.86	8900.24		6081.65	2926.09		2.71972e-05	0.000911956	3527.18	3420.82	2059.74
2030			8.	Melanoma and other skin cancers		70.8348	69.518	70.8277		37.1261	33.7086		0.185513	0.296411	30.4525	21.2763	18.624
2030			9.	Breast cancer		1796.6	1721.85	1840.29		1.03597	1795.56		0.275772	0.000791772	1206.18	378.992	211.153
2030			10.	Cervix uteri cancer		923.197	871.262	935.997		0	923.197		0.296777	0.00440663	492.359	264.597	165.939
2030			11.	Corpus uteri cancer		234.079	227.867	225.789		0	234.079		0.0297061	0.0519386	148.424	54.8712	30.7024
2030			12.	Ovary cancer		456.145	427.733	469.752		0	456.145		0.579799	4.61917	279.294	103.687	67.9653
2030			13.	Prostate cancer		222.424	236.261	204.468		222.424	0		0.000467848	0.000506499	26.5444	72.8871	122.992
2030			14.	Bladder cancer		423.667	428.269	395.939		304.353	119.314		0.623475	0.487402	91.1998	143.889	187.467
2030			15.	Lymphomas, multiple myeloma		796.535	765.928	815.341		488.377	308.158		17.2865	49.881	467.165	149.553	112.649
2030			16.	Leukaemia		1442.99	1377.13	1517.24		800.995	641.991		126.126	212.286	802.392	176.395	125.787
2030		B.	Other neoplasms			346.357	332.896	355.619		159.124	187.232		19.6245	16.1266	184.647	69.8203	56.138
2030		C.	Diabetes mellitus			6608.14	5334.32	7806.41		2742.79	3865.36		7.50405	18.1478	3472.41	1697.95	1412.13
2030		D.	Endocrine disorders			1121.59	947.489	1386.92		471.551	650.043		192.509	52.6589	591.916	128.298	156.212
2030		E.	Neuropsychiatric conditions			53443	53598.9	53518.8		25187.9	28255.1		1874.4	3106.95	39796.9	4286.27	4378.47
2030			1.	Unipolar depressive disorders		20585.1	20788.4	20344.1		8343.39	12241.7		0.000581249	1386.34	16844.5	1946.28	407.924
2030			2.	Bipolar disorder		3718.97	3663.41	3866.78		1834.66	1884.31		0.116377	160.43	3552.9	5.12732	0.39553
2030			3.	Schizophrenia		4790.68	4731.76	4936.31		2474.03	2316.65		0.0502261	527.156	4205.74	38.5575	19.172
2030			4.	Epilepsy		1186.25	1093.98	1343.26		625.618	560.635		61.3304	196.08	830.524	64.1982	34.1205
2030			5.	Alcohol use disorders		5711.59	5753.51	5674.09		5032.47	679.123		0.121285	61.2719	5469.53	156.961	23.708
2030			6.	Alzheimer and other dementias		5556.74	5756.55	5302.17		2033.37	3523.37		115.045	59.208	484.78	1559.81	3337.9
2030			7.	Parkinson disease		433.077	413.203	474.805		202.046	231.032		0.492335	0.127336	130.993	104.944	196.521
2030			8.	Multiple sclerosis		397.842	398.8	398.094		166.093	231.749		0.0513354	45.825	344.638	4.95605	2.37211
2030			9.	Drug use disorders		620.654	608.733	637.186		501.417	119.237		0.00502625	32.1944	584.614	3.12742	0.713327
2030			10.	Post-traumatic stress disorder		1089.52	1097.13	1081.09		293.632	795.892		9.64896e-05	14.8418	1058.85	10.406	5.42247
2030			11.	Obsessive-compulsive disorder		936.859	938.405	940.808		372.386	564.474		0	16.213	904.891	13.6988	2.05602
2030			12.	Panic disorder		1862.01	1853.15	1890.12		621.043	1240.96		0	55.2145	1782.98	15.1031	8.70744
2030			13.	Insomnia (primary)		895.657	907.57	882.925		260.77	634.887		0	26.1369	668.145	141.767	59.6087
2030			14.	Migraine		1844.39	1824.81	1894.12		472.241	1372.15		26.3357	380.357	1437.26	0.398765	0.0387615
2030		F.	Sense organ diseases			33198.3	38713.6	37502.6		15359.8	17838.5		0.729982	27.2701	18886	9609.08	4675.2
2030			1.	Glaucoma		2367.05	2419.14	2304.16		962.994	1404.06		0.0566177	4.97903	1219.99	784.108	357.918
2030			2.	Cataracts		10687.6	15080.2	14264.9		4977.43	5710.21		0.13937	1.05359	5303.43	3401.97	1981.04
2030			3.	Vision disorders, age-related		9483.42	10554.6	10077.4		4062.27	5421.16		0.0558937	20.5705	5229.08	2831.71	1402.01
2030			4.	Hearing loss, adult onset		10652.4	10653	10847.4		5352.98	5299.46		0	0	7128.96	2590.53	932.94
2030		G.	Cardiovascular diseases			42832.1	37246.5	50682.7		22460.6	20371.6		242.345	157.71	12813.4	11543	18075.7
2030			1.	Rheumatic heart disease		1353.92	1148.76	1871.4		581.789	772.126		28.207	22.9711	638.383	336.658	327.697
2030			2.	Hypertensive heart disease		3268.29	2901.18	4011.62		1810.71	1457.59		6.66477	3.15058	857.857	860.399	1540.22
2030			3.	Ischaemic heart disease		11987.7	10379.9	14230.4		6490.93	5496.75		28.4302	70.8499	4211.79	3292.18	4384.43
2030			4.	Cerebrovascular disease		21359.5	18544.3	24563.4		11238.2	10121.3		56.8933	20.1331	5432.05	6157.89	9692.57
2030			5.	Inflammatory heart diseases		871.643	777.038	1091.52		439.937	431.706		24.8203	6.08347	281.761	177.576	381.402
2030		H.	Respiratory diseases			28975.6	24869.3	32558.1		16177.7	12797.9		573.015	863.917	8925.08	6897.01	11716.6
2030			1.	Chronic obstructive pulmonary disease		22385.6	18989.5	25296.4		12524.2	9861.41		7.39773	1.52433	5858.83	6031.29	10486.6
2030			2.	Asthma		3617.57	3395.42	3820.7		1983.38	1634.19		368.82	811.306	2065.62	226.018	145.806
2030		I.	Digestive diseases			8826.13	6795.09	12325.7		5325.08	3501.05		402.536	54.1707	4914.07	1628.12	1827.22
2030			1.	Peptic ulcer disease		1395.48	1116.91	1877.1		901.709	493.77		19.2963	4.3993	784.01	302.529	285.246
2030			2.	Cirrhosis of the liver		2665.84	2015.5	3891.51		1775.42	890.42		30.6366	11.5543	1675.13	520.474	428.043
2030		J.	Genitourinary diseases			4566.84	4191.01	5260.57		2950.77	1616.08		38.7944	48.4515	2560.76	1004.26	914.576
2030			1.	Nephritis and nephrosis		2264.44	1984.67	2768.8		1242.58	1021.86		25.3923	39.0363	1069.52	592.947	537.546
2030			2.	Benign prostatic hypertrophy		1243.05	1273.03	1211.8		1243.05	0		0	0	1028.05	126.45	88.5533
2030		K.	Skin diseases			1200.6	1202.65	1198.59		517.469	683.136		66.5031	108.4	771.059	132.529	122.114
2030		L.	Musculoskeletal diseases			12438.2	12355.2	12842.7		5176.73	7261.51		42.4722	272.991	8499.53	2581.8	1041.45
2030			1.	Rheumatoid arthritis		1579.44	1576.93	1611.75		448.212	1131.22		2.51973	42.3998	1031.89	359.937	142.686
2030			2.	Osteoarthritis		7060.12	7048.47	7201.19		2605.79	4454.33		0.0487215	1.96922	4898.79	1699.8	459.522
2030		M.	Congenital anomalies			3231.71	2787.69	3959.31		1732.12	1499.59		2905.22	103.985	207.56	8.57828	6.36653
2030		N.	Oral conditions			2718.17	2769.42	2665.51		1230.42	1487.75		305.459	127.034	1350.33	755.923	179.42
2030	III.	Injuries				38566	35699.4	46906.9		23814.4	14751.6		1658.18	3101.56	29080.8	2849.04	1876.49
2030		A.	Unintentional injuries			25936.6	24034.4	32840.4		15731.2	10205.4		1594.92	2652.32	18543.3	1792.79	1353.26
2030			1.	Road traffic accidents		13520.7	11560.8	13819.1		9116.49	4404.17		357.877	948.851	11272.8	646.81	294.34
2030			2.	Poisonings		1060.56	890.231	1626.19		568.891	491.666		49.419	81.2876	654.668	170.646	104.536
2030			3.	Falls		3617.19	3686.8	4872.09		2004.26	1612.93		241.706	449.449	1993.79	400.123	532.124
2030			4.	Fires		867.105	807.767	1140.82		287.003	580.102		76.9641	122.261	563.359	49.036	55.485
2030			5.	Drownings		1659.56	1315.77	2649.29		1012.76	646.799		331.445	419.167	710.624	103.786	94.5373
2030			6.	Other unintentional injuries		5211.56	5772.95	8732.91		2741.84	2469.73		537.51	631.307	3348.11	422.391	272.242
2030		B.	Intentional injuries			12629.4	11665.1	14066.5		8083.18	4546.22		63.262	449.233	10537.4	1056.24	523.225
2030			1.	Self-inflicted injuries		7594.28	7386.29	8265.02		3804.9	3789.38		0	231.679	5986.56	905.012	471.028
2030			2.	Violence		4119.02	3614.16	4880.62		3487.08	631.937		53.8212	173.577	3726.44	122.694	42.4941
2030			3.	War		821.349	577.528	810.022		710.881	110.468		7.53979	41.752	739.38	24.4544	8.22255

## Sheet: Europe and Central Asia
DALYs by cause, scenario, sex and age for the years 2002, 2015 and 2030
Source: Mathers CD, Loncar D (2006). Projections of global mortality and burden of disease from 2002 to 2030.
Europe and Central Asia
						Total DALYs ('000)				Baseline DALYs ('000)			Baseline projections ('000) by age group
Year		Cause				Baseline	Optimistic	Pessimistic		Male	Female		0-4	5-14	15-59	60-69	70+
2002	Population (millions)					477.248	477.248	477.248		229.618	247.63		29.113	71.7941	301.927	39.6171	34.7968
2002		All Causes				100913	100913	100913		57970.6	42942.8		8469.2	4142.14	59704.4	14541.2	14056.4
2002	I.	Communicable, maternal, perinatal and nutritional conditions				11779.6	11779.6	11779.6		6755.32	5024.3		5413.16	763.807	5109.52	312.834	180.297
2002		A.	Infectious and parasitic diseases			4997.21	4997.21	4997.21		3384.99	1612.22		1231.41	224.501	3334.23	146.166	60.9132
2002			1.	Tuberculosis		1458.66	1458.66	1458.66		1177	281.658		7.46742	13.1834	1320.77	91.0385	26.2009
2002			2.	STDs excluding HIV		272.682	272.682	272.682		63.0364	209.646		12.7654	3.76471	255.157	0.450952	0.544625
2002			3.	HIV/AIDS		1292.54	1292.54	1292.54		1104.56	187.975		32.6337	14.3051	1238.3	7.15318	0.152132
2002			4.	Diarrhoeal diseases		587.928	587.928	587.928		308.11	279.819		454.956	28.5457	90.0603	7.7546	6.61212
2002			5.	Childhood-cluster diseases		284.81	284.81	284.81		141.531	143.279		242.865	37.8089	3.51586	0.317481	0.302647
2002				a.	Pertussis	85.0225	85.0225	85.0225		42.1878	42.8346		82.2218	2.76045	0.0401757	0	0
2002				d.	Measles	192.509	192.509	192.509		95.926	96.5826		158.314	33.784	0.387833	0.0228684	0
2002				e.	Tetanus	2.88379	2.88379	2.88379		1.33067	1.55311		2.03792	0.0761668	0.2891	0.226982	0.253622
2002			6.	Meningitis		412.903	412.903	412.903		228.169	184.734		314.445	20.8248	66.0084	7.75961	3.86508
2002			7.	Hepatitis B and C		100.28	100.28	100.28		60.9499	39.3304		17.4187	7.05576	70.4277	3.68071	1.69736
2002			8.	Malaria		140.554	140.554	140.554		71.1286	69.4256		5.59116	48.2814	78.2537	5.16583	3.26203
2002			9.	Tropical-cluster diseases		7.37216	7.37216	7.37216		4.95149	2.42067		1.63738	2.89322	2.4316	0.210095	0.199874
2002			10.	Leprosy		0.210945	0.210945	0.210945		0.18368	0.0272658		0	0	0.0539127	0.0244301	0.132603
2002			11.	Dengue		0	0	0		0	0		0	0	0	0	0
2002			12.	Japanese encephalitis		0	0	0		0	0		0	0	0	0	0
2002			13.	Trachoma		0	0	0		0	0		0	0	0	0	0
2002			14.	Intestinal nematode infections		0.554855	0.554855	0.554855		0.351481	0.203374		0.120095	0.088107	0.157715	0.0328888	0.156049
2002		B.	Respiratory infections			2441.46	2441.46	2441.46		1479.65	961.807		1184.55	243.845	767.426	139.057	106.582
2002		C.	Maternal conditions			643.994	643.994	643.994		0	643.994		0	0.935795	643.058	0	0
2002		D.	Perinatal conditions			2286.52	2286.52	2286.52		1296.64	989.883		2286.39	0.0377381	0.0868856	0	0.00810556
2002		E.	Nutritional deficiencies			1410.43	1410.43	1410.43		594.032	816.396		710.812	294.487	364.723	27.6112	12.7943
			1.	Protein-energy malnutrition		163.501	163.501	163.501		83.7713	79.7293		142.558	1.68014	15.2065	2.2068	1.84957
			2.	Iodine deficiency		690.243	690.243	690.243		332.536	357.707		489.024	200.509	0.652027	0.0202909	0.0381965
			3.	Vitamin A deficiency		0.669765	0.669765	0.669765		0.297305	0.372459		0.249601	0.30947	0.0988064	0.0101589	0.00172801
			4.	Iron-deficiency anaemia		506.244	506.244	506.244		162.02	344.224		72.0691	79.9818	320.405	24.05	9.73795
2002	II.	Noncommunicable diseases				72262.3	72262.3	72262.3		38036.3	34226		2431.91	2042.13	40774.1	13446.7	13567.5
2002		A.	Malignant neoplasms			8962.1	8962.1	8962.1		4969.61	3992.49		59.9974	134.701	4893.15	2386.95	1487.29
2002			1.	Mouth and oropharynx cancers		330.227	330.227	330.227		279.563	50.6638		0.620177	2.17	221.504	77.2418	28.6903
2002			2.	Oesophagus cancer		202.196	202.196	202.196		156.779	45.4166		0.0612498	0.0876145	104.888	63.7033	33.456
2002			3.	Stomach cancer		949.462	949.462	949.462		585.57	363.892		0.324899	0.633506	475.178	280.662	192.664
2002			4.	Colon and rectum cancers		888.868	888.868	888.868		457.118	431.75		0.262873	0.646701	382.775	279.054	226.13
2002			5.	Liver cancer		261.528	261.528	261.528		165.271	96.2567		2.1695	1.6723	126.191	79.8551	51.6404
2002			6.	Pancreas cancer		345.196	345.196	345.196		205.481	139.715		0.067602	0.255752	171.095	103.939	69.8387
2002			7.	Trachea, bronchus, lung cancers		1659.07	1659.07	1659.07		1380.41	278.66		0.583657	1.35224	841.23	552.402	263.505
2002			8.	Melanoma and other skin cancers		126.053	126.053	126.053		65.5325	60.5202		0.0332141	0.330748	84.3578	22.993	18.3379
2002			9.	Breast cancer		785.7	785.7	785.7		6.74649	778.953		0.0501286	0.323588	514.695	167.231	103.4
2002			10.	Cervix uteri cancer		283.081	283.081	283.081		0	283.081		0	0.05181	218.224	38.5769	26.2279
2002			11.	Corpus uteri cancer		257.609	257.609	257.609		0	257.609		0.0884746	0.00801226	152.832	66.3357	38.3448
2002			12.	Ovary cancer		272.059	272.059	272.059		0	272.059		0.217719	2.06434	171.312	63.0683	35.3966
2002			13.	Prostate cancer		188.492	188.492	188.492		188.492	0		0.0443948	0.260531	38.9362	72.9782	76.2725
2002			14.	Bladder cancer		205.324	205.324	205.324		166.934	38.3906		0.78076	0.418642	72.1223	72.6652	59.3376
2002			15.	Lymphomas, multiple myeloma		315.986	315.986	315.986		181.379	134.607		4.47687	18.7488	203.149	56.3984	33.2134
2002			16.	Leukaemia		403.827	403.827	403.827		233.675	170.152		22.5096	50.3207	233.947	58.002	39.048
2002		B.	Other neoplasms			101.197	101.197	101.197		51.2251	49.9714		4.71678	4.68379	61.5783	17.6697	12.548
2002		C.	Diabetes mellitus			1115.57	1115.57	1115.57		482.797	632.774		2.45411	10.178	700.801	237.979	164.158
2002		D.	Endocrine disorders			351.177	351.177	351.177		155.631	195.546		63.3658	29.3813	227.176	17.7384	13.5152
2002		E.	Neuropsychiatric conditions			16093.4	16093.4	16093.4		7999.86	8093.5		579.114	1212.41	12732	767.39	802.498
2002			1.	Unipolar depressive disorders		5381.2	5381.2	5381.2		2013.62	3367.58		0.063364	385.153	4595.89	316.601	83.4941
2002			2.	Bipolar disorder		952.148	952.148	952.148		477.367	474.781		0.00341717	43.0768	908.201	0.858286	0.00838329
2002			3.	Schizophrenia		1041.86	1041.86	1041.86		523.438	518.419		0.819978	148.071	885.678	5.01597	2.27134
2002			4.	Epilepsy		384.252	384.252	384.252		219.452	164.8		16.1462	54.6343	290.581	15.3691	7.52073
2002			5.	Alcohol use disorders		2527.75	2527.75	2527.75		2137.62	390.139		2.00236	24.6394	2439.66	53.7577	7.69929
2002			6.	Alzheimer and other dementias		1003.74	1003.74	1003.74		327.193	676.542		30.9691	19.9921	132.836	224.246	595.692
2002			7.	Parkinson disease		170.368	170.368	170.368		71.3444	99.024		2.72215	2.17733	69.8267	55.3381	40.3042
2002			8.	Multiple sclerosis		155.018	155.018	155.018		66.7505	88.2675		0.879944	10.4026	133.74	7.0904	2.90561
2002			9.	Drug use disorders		687.795	687.795	687.795		527.738	160.058		0.871884	13.6342	670.573	2.2817	0.434911
2002			10.	Post-traumatic stress disorder		265.184	265.184	265.184		72.3746	192.809		0.0118193	2.78082	259.332	1.81411	1.24549
2002			11.	Obsessive-compulsive disorder		561.056	561.056	561.056		246.798	314.258		0	92.1453	455.367	6.63574	6.90835
2002			12.	Panic disorder		499.901	499.901	499.901		168.567	331.333		0	14.6373	481.03	2.4216	1.81198
2002			13.	Insomnia (primary)		289.326	289.326	289.326		116.396	172.93		0	5.50135	241.995	26.6405	15.1891
2002			14.	Migraine		523.899	523.899	523.899		163.638	360.261		12.1896	189.533	322.104	0.0554982	0.0168046
2002		F.	Sense organ diseases			3841.1	3841.1	3841.1		1681.73	2159.37		1.47761	3.02882	1951.69	1103.84	781.072
2002			1.	Glaucoma		196.814	196.814	196.814		86.8998	109.914		0.0260764	1.16442	68.9392	66.207	60.4772
2002			2.	Cataracts		320.073	320.073	320.073		138.194	181.879		0.00646766	0.447872	121.213	100.167	98.2381
2002			3.	Vision disorders, age-related		1234.18	1234.18	1234.18		506.889	727.287		0.345931	1.17842	413.234	443.835	375.584
2002			4.	Hearing loss, adult onset		2085	2085	2085		946.861	1138.13		0	0	1345.39	493.093	246.517
2002		G.	Cardiovascular diseases			26320.1	26320.1	26320.1		14679.6	11640.5		83.5795	78.1734	10393.9	6881.6	8882.78
2002			1.	Rheumatic heart disease		315.782	315.782	315.782		144.071	171.71		0.521865	4.2627	230.526	56.1138	24.3569
2002			2.	Hypertensive heart disease		929.44	929.44	929.44		452.556	476.884		2.18935	1.2957	363.411	263.742	298.803
2002			3.	Ischaemic heart disease		12553.3	12553.3	12553.3		7589.87	4963.42		0.648146	12.137	4863.05	3460.44	4217.02
2002			4.	Cerebrovascular disease		8393.24	8393.24	8393.24		4040.42	4352.83		26.1358	28.3197	2737.37	2432.3	3169.12
2002			5.	Inflammatory heart diseases		1049.66	1049.66	1049.66		739.367	310.298		24.3223	10.7326	714.309	153.967	146.334
2002		H.	Respiratory diseases			3431.55	3431.55	3431.55		1949.75	1481.8		169.517	220.9	1855.37	633.854	551.912
2002			1.	Chronic obstructive pulmonary disease		1768.35	1768.35	1768.35		984.535	783.811		3.21363	23.6372	982.649	400.176	358.67
2002			2.	Asthma		684.788	684.788	684.788		394.857	289.931		63.0903	143.331	325.412	83.0942	69.8607
2002		I.	Digestive diseases			5081.94	5081.94	5081.94		2926.4	2155.54		114.918	66.9115	3799.29	677.738	423.084
2002			1.	Peptic ulcer disease		367.153	367.153	367.153		264.701	102.452		0.378044	4.64716	270.648	54.4965	36.9835
2002			2.	Cirrhosis of the liver		1860.06	1860.06	1860.06		1180.79	679.274		4.10981	15.0947	1438.42	291.485	110.956
2002		J.	Genitourinary diseases			1186.14	1186.14	1186.14		603.992	582.151		25.533	36.1219	795.957	184.038	144.492
2002			1.	Nephritis and nephrosis		472.686	472.686	472.686		252.99	219.696		10.1884	21.5682	314.886	71.8605	54.1833
2002			2.	Benign prostatic hypertrophy		149.912	149.912	149.912		149.912	0		0	0	86.8617	38.2775	24.7729
2002		K.	Skin diseases			241.135	241.135	241.135		116.79	124.345		7.77372	12.8724	181.432	23.7129	15.3438
2002		L.	Musculoskeletal diseases			3511.12	3511.12	3511.12		1361.27	2149.85		10.856	122.237	2662.95	451.96	263.119
2002			1.	Rheumatoid arthritis		635.618	635.618	635.618		155.412	480.206		2.94284	57.8064	495.297	49.8575	29.7143
2002			2.	Osteoarthritis		1943.17	1943.17	1943.17		766.341	1176.83		0.076182	0.501866	1435.28	332.038	175.275
2002		M.	Congenital anomalies			1386.68	1386.68	1386.68		758.344	628.332		1268.38	40.9464	73.392	2.87874	1.07897
2002		N.	Oral conditions			639.173	639.173	639.173		299.287	339.885		40.2255	69.5812	445.396	59.337	24.6334
2002	III.	Injuries				16871.5	16871.5	16871.5		13179	3692.44		624.13	1336.21	13820.8	781.691	308.614
2002		A.	Unintentional injuries			11475.6	11475.6	11475.6		8786.46	2689.12		599.364	1160.38	8907.9	579.525	228.419
2002			1.	Road traffic accidents		2384.23	2384.23	2384.23		1740.61	643.62		57.4902	208.117	2003.29	79.6575	35.6761
2002			2.	Poisonings		1991.52	1991.52	1991.52		1540.25	451.27		33.7386	31.0266	1761.53	140.252	24.9759
2002			3.	Falls		1447.49	1447.49	1447.49		1085.24	362.251		99.7379	220.316	979.711	76.2158	71.5102
2002			4.	Fires		575.173	575.173	575.173		436.125	139.048		66.6941	61.3379	398.031	33.3249	15.7843
2002			5.	Drownings		807.177	807.177	807.177		666.383	140.794		53.4487	102.667	613.209	29.122	8.73081
2002			6.	Other unintentional injuries		4270	4270	4270		3317.86	952.141		288.255	536.918	3152.13	220.953	71.7418
2002		B.	Intentional injuries			5395.87	5395.87	5395.87		4392.56	1003.31		24.7661	175.824	4912.92	202.166	80.1951
2002			1.	Self-inflicted injuries		2502.95	2502.95	2502.95		2079.53	423.427		0.18876	88.8483	2232.18	126.319	55.4223
2002			2.	Violence		2146.76	2146.76	2146.76		1639.18	507.58		15.1273	59.522	1987.61	63.2482	21.2488
2002			3.	War		726.299	726.299	726.299		660.518	65.7805		7.66002	27.2785	675.371	12.4839	3.50568
2015	Population (millions)					457.766	430.595	425.861		211.294	246.472		28.4002	56.8565	294.096	40.8718	37.5414
2015		All Causes				89740.9	85102.6	97218		49829	39911.8		5230.85	2695	55090	12697.4	14027.6
2015	I.	Communicable, maternal, perinatal and nutritional conditions				11674.6	9312.78	14006		7469.34	4205.3		2881.13	404.092	7973.99	261.232	154.199
2015		A.	Infectious and parasitic diseases			8025.71	6419.53	9108.88		5608.04	2417.67		517.73	185.723	7099.91	167.731	54.6159
2015			1.	Tuberculosis		1440.82	910.863	1566.49		1111.51	329.314		6.24901	9.47632	1342.26	64.4903	18.3459
2015			2.	STDs excluding HIV		174.532	142.284	213.292		36.9551	137.577		6.55073	2.00939	165.2	0.308026	0.463657
2015			3.	HIV/AIDS		5462.47	4589.76	6001.95		3962.11	1500.36		39.3017	67.6167	5275.89	72.7277	6.93071
2015			4.	Diarrhoeal diseases		289.515	268.73	425.771		152.451	137.064		200.007	15.3373	62.8738	5.50761	5.78886
2015			5.	Childhood-cluster diseases		107.725	84.0389	150.482		55.8638	51.8611		90.8519	14.9766	1.50777	0.155988	0.232623
2015				a.	Pertussis	50.7011	43.8533	61.2787		26.2606	24.4405		47.9275	2.76045	0.0131733	0	0
2015				d.	Measles	54.4216	38.119	85.4172		28.4446	25.977		42.2817	11.7944	0.337832	0.00772009	0
2015				e.	Tetanus	0.984823	0.752799	1.43586		0.429753	0.55507		0.528199	0.0290358	0.113365	0.115987	0.198237
2015			6.	Meningitis		141.643	97.5172	219.305		80.248	61.3955		98.001	7.27603	29.2979	3.98295	3.08549
2015			7.	Hepatitis B and C		51.7174	35.0442	74.1408		30.4751	21.2423		10.5177	3.21356	34.4728	2.21843	1.29489
2015			8.	Malaria		133.807	128.659	139.177		67.6582	66.1488		4.23938	44.9303	76.4139	5.00855	3.21481
2015			9.	Tropical-cluster diseases		4.18273	2.68616	5.88261		2.71027	1.47246		0.690917	1.43889	1.80428	0.104509	0.144132
2015			10.	Leprosy		0.141858	0.122882	0.159567		0.121298	0.0205596		0	0	0.0229412	0.0221844	0.0967321
2015			11.	Dengue		0	0	0		0	0		0	0	0	0	0
2015			12.	Japanese encephalitis		0	0	0		0	0		0	0	0	0	0
2015			13.	Trachoma		0	0	0		0	0		0	0	0	0	0
2015			14.	Intestinal nematode infections		0.381081	0.303335	0.472066		0.253389	0.127692		0.0743737	0.0505417	0.0975868	0.0216756	0.136903
2015		B.	Respiratory infections			1238.21	903.065	1738.96		745.865	492.348		566.285	96.8333	409.207	76.0618	89.8263
2015		C.	Maternal conditions			248.163	171.029	396.897		0	248.163		0	0.935795	247.227	0	0
2015		D.	Perinatal conditions			1410.86	1203.64	1754.54		798.542	612.314		1410.81	0.0127026	0.0293664	0	0.00542393
2015		E.	Nutritional deficiencies			751.706	615.518	1006.72		316.9	434.806		386.31	120.587	217.618	17.4393	9.75172
2015			1.	Protein-energy malnutrition		98.2456	77.7689	125.938		50.2631	47.9825		85.7602	0.796551	9.25462	1.09501	1.33923
2015			2.	Iodine deficiency		331.974	286.462	452.988		161.668	170.305		255.1	76.4232	0.411855	0.0106123	0.0280401
2015			3.	Vitamin A deficiency		0.428206	0.300795	0.55027		0.194955	0.233251		0.196838	0.177586	0.0439451	0.00767567	0.002162
2015			4.	Iron-deficiency anaemia		296.098	230.631	393.38		96.9238	199.174		41.5297	38.4221	193.266	15.488	7.39177
2015	II.	Noncommunicable diseases				64393.2	62608.6	67984.4		32024	32369.2		1872.11	1480.93	35697.8	11782.3	13560.1
2015		A.	Malignant neoplasms			8031.15	7915.77	8002.9		4115.86	3915.29		50.4705	94.044	4296.63	2135.39	1454.62
2015			1.	Mouth and oropharynx cancers		269.279	264.845	269.844		219.38	49.8996		0.551178	1.52496	176.623	62.477	28.1027
2015			2.	Oesophagus cancer		176.832	173.33	175.742		128.113	48.7191		0.0751857	0.0788789	90.8703	53.5713	32.2361
2015			3.	Stomach cancer		826.898	814.672	818.334		476.993	349.906		0.331417	0.507987	407.577	235.276	183.206
2015			4.	Colon and rectum cancers		803.4	794.702	779.174		391.721	411.678		0.278229	0.469195	336.34	245.477	220.835
2015			5.	Liver cancer		236.143	232.397	234.222		141.966	94.177		1.76264	1.11976	112.711	70.6608	49.8894
2015			6.	Pancreas cancer		298.751	294.852	294.419		167.096	131.655		0.0541477	0.184425	140.919	90.6104	66.9827
2015			7.	Trachea, bronchus, lung cancers		1472.96	1452.21	1497.98		1123.82	349.138		0.000768861	0.0028304	727.774	484.492	260.693
2015			8.	Melanoma and other skin cancers		109.277	107.332	110.036		54.7196	54.5576		0.0239156	0.236941	69.0467	20.4923	19.4772
2015			9.	Breast cancer		764.329	751.733	765.856		5.44519	758.884		0.0541739	0.244953	497.301	168.941	97.7871
2015			10.	Cervix uteri cancer		259.988	254.037	264.194		0	259.988		0	0.0480927	195.681	40.1356	24.1235
2015			11.	Corpus uteri cancer		274.508	273.636	255.723		0	274.508		0.116264	0.0108668	166.953	71.5221	35.9055
2015			12.	Ovary cancer		252.115	246.65	252.284		0	252.115		0.216458	1.5498	156.309	62.0324	32.0077
2015			13.	Prostate cancer		174.684	174.234	164.129		174.684	0		0.0358369	0.210385	31.0649	58.847	84.5256
2015			14.	Bladder cancer		189.115	188.02	182.993		150.16	38.9554		0.676493	0.32999	63.567	62.2176	62.3244
2015			15.	Lymphomas, multiple myeloma		287.003	282	289.401		158.336	128.667		3.76185	13.3889	182.877	54.4765	32.4988
2015			16.	Leukaemia		351.467	345.792	355.033		197.108	154.36		19.4154	36.4727	203.962	53.6069	38.0099
2015		B.	Other neoplasms			87.3576	86.3019	87.914		41.3628	45.9947		3.96123	2.99621	51.0746	16.6874	12.6381
2015		C.	Diabetes mellitus			1063.93	968.169	1162.25		448.472	615.46		1.86391	6.71275	671.275	226.156	157.925
2015		D.	Endocrine disorders			267.333	244.834	308.346		117.741	149.592		41.2959	16.8057	180.397	15.965	12.87
2015		E.	Neuropsychiatric conditions			14722.3	14665.4	14835.6		6923.36	7798.97		465.362	919.172	11647.3	790.473	900.05
2015			1.	Unipolar depressive disorders		5294.1	5305.42	5263.78		1849.99	3444.11		0.051092	304.043	4570.3	337.868	81.836
2015			2.	Bipolar disorder		807.535	799.666	829.81		398.268	409.267		0.00272096	32.8213	773.846	0.856374	0.00803159
2015			3.	Schizophrenia		898.948	890.726	919.622		439.606	459.342		0.653817	102.687	789.205	4.18009	2.2215
2015			4.	Epilepsy		321.294	305.813	350.012		179.246	142.047		12.5385	37.6021	250.389	13.9339	6.82964
2015			5.	Alcohol use disorders		2125.99	2127.23	2124.33		1771.77	354.223		1.59913	18.1439	2053.86	45.5929	6.79317
2015			6.	Alzheimer and other dementias		1110.67	1110.49	1101.91		370.14	740.528		28.4964	14.7423	127.051	241.615	698.763
2015			7.	Parkinson disease		153.489	148.742	165.166		62.3194	91.1695		2.21042	1.40033	63.4968	49.4615	36.9198
2015			8.	Multiple sclerosis		136.569	134.568	141.995		56.3371	80.2323		0.711231	7.99778	118.058	6.80626	2.99598
2015			9.	Drug use disorders		550.279	542.777	570.881		414.454	135.825		0.685264	10.0825	536.948	2.17412	0.38905
2015			10.	Post-traumatic stress disorder		253.479	253.865	252.497		66.2527	187.226		0.00997728	2.23488	248.045	1.94536	1.24385
2015			11.	Obsessive-compulsive disorder		512.919	512.412	514.864		218.36	294.559		0	72.2817	427.02	7.16466	6.45271
2015			12.	Panic disorder		431.101	429.298	436.458		141.908	289.193		0	11.3362	415.549	2.52737	1.68777
2015			13.	Insomnia (primary)		284.232	284.976	282.034		105.832	178.401		0	4.34007	236.639	28.0505	15.203
2015			14.	Migraine		431.084	428.111	439.589		130.685	300.399		11.5674	152.309	267.141	0.0533103	0.0143313
2015		F.	Sense organ diseases			3813.01	3896.81	3906.56		1544.71	2268.31		1.00212	2.29448	1950.83	1098.3	760.588
2015			1.	Glaucoma		206.303	207.212	203.311		84.6704	121.632		0.0247845	0.989457	72.1867	69.8918	63.2101
2015			2.	Cataracts		297.251	340.325	334.007		120.892	176.359		0.00448233	0.275488	111.822	89.9664	95.1831
2015			3.	Vision disorders, age-related		1267.54	1316.05	1291.78		484.4	783.135		0.339173	0.912591	434.18	454.267	377.836
2015			4.	Hearing loss, adult onset		2038.46	2029.94	2073.49		852.781	1185.68		0	0	1330.54	483.78	224.14
2015		G.	Cardiovascular diseases			23026.7	22377.9	24802.5		12256.4	10770.2		73.2556	44.6088	8366.2	5696.07	8846.55
2015			1.	Rheumatic heart disease		237.448	217.805	284.838		106.118	131.329		0.494512	2.41555	174.504	40.0995	19.9339
2015			2.	Hypertensive heart disease		771.891	727.18	890.277		373.374	398.518		2.2402	0.743086	293.973	196.875	278.06
2015			3.	Ischaemic heart disease		11265.9	11063	11941.1		6455.33	4810.54		0.611904	10.2842	4081.12	2954.95	4218.9
2015			4.	Cerebrovascular disease		7497.15	7242.94	7916.63		3473	4024.15		22.4301	15.9297	2344.85	2021.86	3092.07
2015			5.	Inflammatory heart diseases		773.377	729.833	905.334		519.384	253.993		21.9263	5.02847	491.693	109.759	144.97
2015		H.	Respiratory diseases			3128.24	2856.34	3462.99		1648.86	1479.37		143.117	163.661	1693.37	546.906	581.178
2015			1.	Chronic obstructive pulmonary disease		1658.98	1493.51	1881.45		823.9	835.075		2.52284	13.3269	920.42	340.405	382.301
2015			2.	Asthma		609.111	592.175	626.127		341.445	267.666		60.4358	115.328	298.213	68.2062	66.928
2015		I.	Digestive diseases			3991.65	3491.31	4837.19		2236.81	1754.84		61.7926	32.1147	2949.63	552.725	395.392
2015			1.	Peptic ulcer disease		296.383	262.946	351.111		210.894	85.4893		0.21729	1.93487	214.321	44.3117	35.5977
2015			2.	Cirrhosis of the liver		1488.54	1294.03	1813.02		923.723	564.822		2.76408	8.01526	1152.99	229.981	94.7946
2015		J.	Genitourinary diseases			964.635	898.527	1096.56		521.306	443.329		15.3473	18.2231	630.697	158.971	141.397
2015			1.	Nephritis and nephrosis		397.969	362.653	457.613		215.382	182.587		6.82083	11.1095	259.908	66.6076	53.5233
2015			2.	Benign prostatic hypertrophy		152.755	153.727	150.289		152.755	0		0	0	93.245	32.3972	27.113
2015		K.	Skin diseases			220.483	219.32	222.801		98.6685	121.815		7.2837	9.92539	164.909	21.7878	16.5768
2015		L.	Musculoskeletal diseases			3417	3399.01	3479.28		1226.37	2190.63		9.83954	93.8516	2599.79	458.778	254.74
2015			1.	Rheumatoid arthritis		595.568	592.444	606.776		137.038	458.53		2.81194	43.9824	469.383	50.761	28.63
2015			2.	Osteoarthritis		1942.34	1934.8	1976.5		701.923	1240.42		0.0458833	0.415827	1440.72	336.786	164.371
2015		M.	Congenital anomalies			1033.75	961.427	1158.92		566.282	467.471		958.013	20.7686	51.7609	2.27544	0.935445
2015		N.	Oral conditions			625.587	627.512	620.567		277.707	347.88		39.5095	55.7503	443.947	61.7693	24.6108
2015	III.	Injuries				13673.1	13181.2	15227.6		10335.7	3337.33		477.603	809.979	11418.2	653.9	313.373
2015		A.	Unintentional injuries			8520.98	8231.64	9925.02		6209.94	2311.04		444.853	666.748	6710.01	466.126	233.244
2015			1.	Road traffic accidents		2258.31	2118.36	2180.07		1583.68	674.627		53.3728	155.274	1938.78	75.3956	35.4848
2015			2.	Poisonings		1313.72	1255.99	1682.45		949.776	363.947		21.512	16.4942	1151.74	101.528	22.452
2015			3.	Falls		1072.08	1048.46	1235.3		768.914	303.165		76.0493	127.531	720.487	67.2146	80.7971
2015			4.	Fires		414.591	403.207	491.179		297.033	117.558		49.0587	36.6308	287.96	25.515	15.4259
2015			5.	Drownings		506.296	472.293	645.648		406.294	100.002		42.9813	47.7875	386.159	21.3102	8.0584
2015			6.	Other unintentional injuries		2955.98	2933.33	3690.37		2204.25	751.739		201.878	283.031	2224.89	175.163	71.0252
2015		B.	Intentional injuries			5152.08	4949.55	5302.58		4125.79	1026.29		32.7502	143.231	4708.2	187.774	80.1291
2015			1.	Self-inflicted injuries		2390	2341.28	2464.56		1984.3	405.701		0.182818	67.4698	2162.63	108.217	51.5025
2015			2.	Violence		2134.93	2057.46	2217.38		1583.71	551.223		23.3794	54.1979	1963.86	68.9901	24.5088
2015			3.	War		602.525	527.174	594.183		541.586	60.9382		7.44856	21.3963	559.166	10.4158	4.09819
2030	Population (millions)					431.538	413.654	397.586		191.98	239.557		24.1289	51.2694	267.458	42.5125	46.1687
2030		All Causes				76927.3	69528.7	85233.8		40117.2	36810.2		3019.35	2124.7	45801.3	10846.8	15135.2
2030	I.	Communicable, maternal, perinatal and nutritional conditions				9273.01	5356.82	10983.6		5819.81	3453.21		1441.22	300.173	7134.26	251.335	146.028
2030		A.	Infectious and parasitic diseases			7364.26	4125.12	7914.13		4829.18	2535.08		249.197	194.842	6674.47	190.646	55.1057
2030			1.	Tuberculosis		686.269	197.383	888.069		520.763	165.506		2.70286	4.83012	635.155	31.4949	12.0855
2030			2.	STDs excluding HIV		103.73	69.9478	141.26		23.6442	80.086		3.15233	1.25013	98.6123	0.239528	0.475902
2030			3.	HIV/AIDS		6045.74	3413.2	6019.89		4010.49	2035.25		47.0436	113.349	5734.13	137.048	14.1665
2030			4.	Diarrhoeal diseases		149.049	170.954	293.068		78.0284	71.0202		87.2322	9.56227	41.7799	4.51349	5.96077
2030			5.	Childhood-cluster diseases		54.3807	42.9902	80.2543		28.9582	25.4225		45.7721	7.53756	0.779839	0.0803797	0.210864
2030				a.	Pertussis	38.3131	34.2791	46.1251		20.2826	18.0304		35.5477	2.76045	0.00491467	0	0
2030				d.	Measles	14.9812	8.01314	32.168		8.22777	6.75347		10.061	4.59441	0.322499	0.0033731	0
2030				e.	Tetanus	0.421726	0.284119	0.680753		0.153996	0.267731		0.118071	0.011936	0.0498861	0.0619689	0.179864
2030			6.	Meningitis		51.1511	25.3662	104.576		29.3461	21.8051		29.2532	3.0758	13.6287	2.28547	2.90788
2030			7.	Hepatitis B and C		25.6063	12.8185	47.9375		14.7241	10.8822		4.97457	1.53405	16.2108	1.53983	1.34706
2030			8.	Malaria		129.174	124.715	136.579		65.3019	63.8722		3.04607	43.4462	74.3683	5.06899	3.24459
2030			9.	Tropical-cluster diseases		2.50101	1.24006	4.60675		1.63608	0.864926		0.299566	0.742716	1.17362	0.124178	0.160927
2030			10.	Leprosy		0.14184	0.109247	0.17093		0.121881	0.0199589		0	0	0.01032	0.0263961	0.105124
2030			11.	Dengue		0	0	0		0	0		0	0	0	0	0
2030			12.	Japanese encephalitis		0	0	0		0	0		0	0	0	0	0
2030			13.	Trachoma		0	0	0		0	0		0	0	0	0	0
2030			14.	Intestinal nematode infections		0.286259	0.204515	0.391377		0.212372	0.0738864		0.041215	0.0306382	0.0581983	0.0171286	0.139079
2030		B.	Respiratory infections			655.736	383.958	1124.91		390.069	265.668		246.279	43.3032	236.517	47.6275	82.0096
2030		C.	Maternal conditions			98.1284	49.6456	211.427		0	98.1284		0	0.935795	97.1926	0	0
2030		D.	Perinatal conditions			756.856	528.091	1101.26		431.236	325.62		756.834	0.00564698	0.0089337	0	0.00738946
2030		E.	Nutritional deficiencies			398.034	270.001	631.878		169.32	228.714		188.912	61.0867	126.069	13.061	8.90513
2030			1.	Protein-energy malnutrition		53.9287	34.8224	82.2526		27.7254	26.2032		46.1179	0.414612	5.51201	0.748082	1.13602
2030			2.	Iodine deficiency		155.641	114.415	251.036		76.5854	79.0559		118.843	36.5214	0.240357	0.00860352	0.0276787
2030			3.	Vitamin A deficiency		0.260253	0.143975	0.419299		0.121144	0.139108		0.125054	0.107496	0.0218042	0.00361353	0.00228551
2030			4.	Iron-deficiency anaemia		175.373	111.867	277.694		60.7476	114.625		22.0883	21.7199	113.055	11.7066	6.80309
2030	II.	Noncommunicable diseases				56735.8	54191.6	61154.2		26212.3	30523.5		1272.12	1250.22	29517.5	10061.2	14634.8
2030		A.	Malignant neoplasms			7269.71	7194.99	7111.32		3525.17	3744.54		33.9182	71.7686	3650.74	1852.4	1660.89
2030			1.	Mouth and oropharynx cancers		230.952	229.647	224.895		181.873	49.0796		0.38229	1.1202	148.642	50.5674	30.241
2030			2.	Oesophagus cancer		172.09	167.946	167.041		114.261	57.8282		0.0658015	0.0766818	82.1553	51.8186	37.9732
2030			3.	Stomach cancer		751.077	744.49	720.169		406.316	344.761		0.266788	0.447813	342.606	204.505	203.251
2030			4.	Colon and rectum cancers		722.412	722.375	673.561		331.799	390.613		0.226764	0.383047	286.17	193.682	241.951
2030			5.	Liver cancer		221.738	218.304	214.669		127.156	94.5816		1.12938	0.821397	98.1077	64.0169	57.6628
2030			6.	Pancreas cancer		265.227	263.934	252.875		139.901	125.326		0.0307289	0.151045	116.539	72.9863	75.5196
2030			7.	Trachea, bronchus, lung cancers		1405.55	1425.1	1401.31		973.307	432.24		0.000768861	0.0028304	669.727	432.133	303.683
2030			8.	Melanoma and other skin cancers		91.5686	89.5998	90.9574		45.3408	46.2278		0.0135982	0.18527	52.6076	16.6076	22.1545
2030			9.	Breast cancer		695.116	671.176	699.813		4.55919	690.557		0.0509005	0.201141	420.058	152.341	122.465
2030			10.	Cervix uteri cancer		221.842	210.621	228.76		0	221.842		0	0.0462939	153.262	37.7513	30.7817
2030			11.	Corpus uteri cancer		263.956	257.734	246.64		0	263.956		0.113326	0.0132613	149.91	67.645	46.2746
2030			12.	Ovary cancer		215.724	205.8	218.747		0	215.724		0.197569	1.2227	121.826	52.8648	39.6131
2030			13.	Prostate cancer		156.756	162.774	134.369		156.756	0		0.0262428	0.151648	27.1753	45.7587	83.6442
2030			14.	Bladder cancer		178.964	182.071	164.046		137.389	41.5748		0.438861	0.299179	57.524	53.503	67.1987
2030			15.	Lymphomas, multiple myeloma		253.494	246.899	254.269		136.202	117.293		2.45889	9.63641	154.68	48.8307	37.8886
2030			16.	Leukaemia		297.39	288.928	300.788		162.813	134.577		13.363	28.0158	166.311	46.9464	42.7542
2030		B.	Other neoplasms			73.5565	72.3226	73.3035		33.2643	40.2923		2.52221	2.19319	40.121	13.8609	14.8592
2030		C.	Diabetes mellitus			1015.28	853.078	1170.12		419.138	596.14		1.36464	4.97974	585.541	227.944	195.448
2030		D.	Endocrine disorders			200.595	172.374	248.188		88.9091	111.686		23.7251	11.6923	135.719	14.1085	15.3499
2030		E.	Neuropsychiatric conditions			12993.6	13021	13011.8		5845.76	7147.85		323.691	807.004	9955.13	812.837	1094.94
2030			1.	Unipolar depressive disorders		4903.73	4958.97	4830.33		1661.43	3242.29		0.0344281	273.971	4163.38	360.3	106.043
2030			2.	Bipolar disorder		645.226	637.224	668.222		318.833	326.393		0.00180208	28.7104	615.645	0.860414	0.00905144
2030			3.	Schizophrenia		743.828	735.299	765.771		365.531	378.296		0.437337	88.9016	648.647	3.56957	2.27218
2030			4.	Epilepsy		264.076	243.463	299.768		145.25	118.826		8.73648	29.6709	204.127	13.4262	8.11519
2030			5.	Alcohol use disorders		1709.09	1729.55	1697.08		1421.04	288.048		1.13317	16.1861	1647.07	37.1173	7.57498
2030			6.	Alzheimer and other dementias		1255.71	1279.95	1195.3		374.456	881.249		23.0062	12.6171	118.448	256.422	845.212
2030			7.	Parkinson disease		143.118	135.194	158.226		55.9102	87.2081		1.50454	1.05115	55.2467	42.2383	43.0776
2030			8.	Multiple sclerosis		113.784	111.04	120.267		46.7227	67.061		0.501775	7.16515	96.3631	5.99797	3.75567
2030			9.	Drug use disorders		423.334	414.991	447.121		318.394	104.94		0.474579	9.15134	411.244	2.01823	0.445739
2030			10.	Post-traumatic stress disorder		222.407	224.244	220.158		57.817	164.59		0.00699941	2.00797	216.69	2.05117	1.65038
2030			11.	Obsessive-compulsive disorder		443.932	445.923	443.914		185.903	258.029		0	64.7099	363.219	8.07048	7.93286
2030			12.	Panic disorder		350.713	349.543	355.413		115.521	235.193		0	10.0454	335.833	2.63166	2.20285
2030			13.	Insomnia (primary)		266.85	270.569	261.247		94.4398	172.411		0	3.90194	214.599	29.2384	19.1106
2030			14.	Migraine		353.168	350.126	361.899		108.6	244.568		9.80323	135.268	208.027	0.0530924	0.0175001
2030		F.	Sense organ diseases			3902.98	4184.76	4046.08		1451.82	2451.16		0.637096	1.9609	1851.31	1120.11	928.964
2030			1.	Glaucoma		230.597	236.236	220.309		83.885	146.713		0.0223466	0.904932	73.1256	76.2667	80.278
2030			2.	Cataracts		277.649	390.551	364.571		102.103	175.546		0.00294024	0.176875	94.0464	78.1238	105.299
2030			3.	Vision disorders, age-related		1379.42	1532.54	1432.18		471.31	908.108		0.27964	0.807142	436.021	475.252	467.057
2030			4.	Hearing loss, adult onset		2012.87	2023.23	2026.05		793.113	1219.76		0	0	1246.63	490.165	276.076
2030		G.	Cardiovascular diseases			19476.5	18192.4	21726		9336.52	10140		54.7761	29.5531	6073.62	4298.39	9020.14
2030			1.	Rheumatic heart disease		183.375	154.879	241.889		82.4161	100.959		0.377573	1.51735	128.831	30.0496	22.6001
2030			2.	Hypertensive heart disease		754.15	685.664	898.134		342.73	411.42		1.65756	0.568244	239.981	194.422	317.52
2030			3.	Ischaemic heart disease		9392.82	8941.15	10367.2		4825.3	4567.52		0.516287	9.5355	2997.04	2235.81	4149.92
2030			4.	Cerebrovascular disease		6445.96	5900.46	6944.49		2675.08	3770.88		17.1642	8.84239	1722.52	1467.62	3229.82
2030			5.	Inflammatory heart diseases		609.947	548.972	759.453		385.416	224.532		16.1015	3.03894	341.121	92.397	157.289
2030		H.	Respiratory diseases			2953.01	2512.7	3479.2		1434.75	1518.26		109.065	138.186	1463.09	545.102	697.572
2030			1.	Chronic obstructive pulmonary disease		1619.14	1341.22	1982.69		714.189	904.955		1.73353	9.56029	806.991	341.115	459.745
2030			2.	Asthma		553.197	528.619	574.286		297.791	255.406		51.6722	104.367	259.064	63.1394	74.9541
2030		I.	Digestive diseases			3279.02	2574.66	4400.88		1789.12	1489.9		28.3382	16.4838	2288.59	473.064	472.541
2030			1.	Peptic ulcer disease		253.692	206.821	326.968		176.32	77.3723		0.106284	0.809409	171.67	39.3424	41.7642
2030			2.	Cirrhosis of the liver		1228.98	946.995	1682.37		753.212	475.77		1.53768	4.31273	918.133	193.365	111.634
2030		J.	Genitourinary diseases			826.652	744.619	980.402		466.453	360.199		8.53322	10.4915	500.942	147.992	158.694
2030			1.	Nephritis and nephrosis		349.854	303.178	428.894		189.536	160.317		3.98758	6.74641	207.506	66.6478	64.9659
2030			2.	Benign prostatic hypertrophy		155.933	161.625	147.568		155.933	0		0	0	100.794	28.6698	26.4692
2030		K.	Skin diseases			196.856	197.343	197.232		83.5165	113.34		5.99035	8.85679	141.943	20.0253	20.041
2030		L.	Musculoskeletal diseases			3256.46	3257.16	3298.95		1099.58	2156.88		7.931	83.0641	2378.22	465.067	322.178
2030			1.	Rheumatoid arthritis		540.013	538.016	549.752		121.193	418.82		2.31591	38.54	411.948	51.3821	35.8272
2030			2.	Osteoarthritis		1904.42	1909.45	1925.21		639.754	1264.66		0.0251516	0.36447	1353.25	340.871	209.902
2030		M.	Congenital anomalies			689.617	602.887	821.703		380.005	309.612		638.033	13.2669	35.4182	1.80473	1.09433
2030		N.	Oral conditions			601.936	611.292	589.02		258.291	343.645		33.6	50.7153	417.086	68.4827	32.0515
2030	III.	Injuries				10918.6	9980.28	13095.9		8085.05	2833.5		306	574.309	9149.62	534.246	354.38
2030		A.	Unintentional injuries			6208.86	5647.62	8173.94		4290.73	1918.13		277.888	441.014	4844.66	376.825	268.47
2030			1.	Road traffic accidents		1887.23	1652.87	1948.23		1272.46	614.769		39.6764	121.954	1620.79	65.1722	39.6447
2030			2.	Poisonings		864.183	746.566	1322.5		582.676	281.507		10.9757	10.389	742.473	75.8611	24.4837
2030			3.	Falls		802.817	748.384	1013.19		541.458	261.359		49.3698	85.1648	515.596	56.504	96.1833
2030			4.	Fires		298.832	276.201	396.721		201.023	97.8091		30.6797	26.1223	204.484	19.9692	17.5771
2030			5.	Drownings		318.411	266.586	480.791		246.114	72.2974		28.663	27.014	238.06	15.8644	8.80991
2030			6.	Other unintentional injuries		2037.38	1957.02	3012.5		1447	590.384		118.524	170.37	1523.26	143.454	81.7711
2030		B.	Intentional injuries			4709.69	4332.66	4921.99		3794.32	915.374		28.1115	133.295	4304.96	157.421	85.9105
2030			1.	Self-inflicted injuries		2170.06	2094.46	2274.77		1804.01	366.046		0.151877	61.6258	1965.54	89.4041	53.3323
2030			2.	Violence		2014.92	1849.42	2132.53		1530.11	484.814		19.8143	52.1422	1855.44	59.1865	28.3432
2030			3.	War		495.882	362.225	483.122		441.623	54.2588		6.47132	19.3711	457.236	8.58867	4.21529

## Sheet: High income
DALYs by cause, scenario, sex and age for the years 2002, 2015 and 2030
Source: Mathers CD, Loncar D (2006). Projections of global mortality and burden of disease from 2002 to 2030.
High Income
						Total DALYs ('000)				Baseline DALYs ('000)			Baseline projections ('000) by age group
Year		Cause				Baseline	Optimistic	Pessimistic		Male	Female		0-4	5-14	15-59	60-69	70+
2002	Population (millions)					932.387	932.387	932.387		458.447	473.941		55.0186	115.855	579.932	85.2012	96.3806
2002		All Causes				118093	118093	118093		62786.9	55306.5		4906.45	3983.63	67300.9	17057.7	24844.8
2002	I.	Communicable, maternal, perinatal and nutritional conditions				7162.01	7162.01	7162.01		3588.21	3573.8		1988.86	289.556	3309.41	459.604	1114.57
2002		A.	Infectious and parasitic diseases			2802.54	2802.54	2802.54		1626.71	1175.83		376.035	138.179	1782.54	215.218	290.571
2002			1.	Tuberculosis		148.813	148.813	148.813		102.766	46.0473		1.10777	1.98078	84.366	23.9902	37.3686
2002			2.	STDs excluding HIV		185.793	185.793	185.793		28.0789	157.714		2.95633	2.58376	178.382	0.721452	1.14936
2002			3.	HIV/AIDS		608.842	608.842	608.842		461.394	147.448		2.85981	3.45251	589.751	10.7788	2.00002
2002			4.	Diarrhoeal diseases		314.825	314.825	314.825		158.644	156.18		90.9359	28.4301	157.491	16.4802	21.4873
2002			5.	Childhood-cluster diseases		165.75	165.75	165.75		82.5323	83.2173		155.951	3.13588	3.85305	1.25427	1.55594
2002				a.	Pertussis	156.584	156.584	156.584		77.8467	78.7374		155.015	1.554	0.015286	0	0
2002				d.	Measles	2.55583	2.55583	2.55583		1.42078	1.13505		0.866506	1.29779	0.391527	0	0
2002				e.	Tetanus	0.731559	0.731559	0.731559		0.325565	0.405995		0.0343056	0.00101799	0.274219	0.155255	0.266761
2002			6.	Meningitis		120.068	120.068	120.068		64.004	56.0637		54.1096	11.8373	41.9927	6.68154	5.44649
2002			7.	Hepatitis B and C		209.191	209.191	209.191		136.323	72.8681		0.679938	0.280865	132.136	41.4334	34.6617
2002			8.	Malaria		2.10687	2.10687	2.10687		1.35009	0.756781		0.164385	0.133697	1.63608	0.115649	0.0570574
2002			9.	Tropical-cluster diseases		248.068	248.068	248.068		208.992	39.0754		6.08259	32.8012	206.934	1.67501	0.575378
2002			10.	Leprosy		0.452588	0.452588	0.452588		0.295141	0.157447		0.00166974	0.0250304	0.1391	0.0937275	0.193061
2002			11.	Dengue		0.261474	0.261474	0.261474		0.202709	0.0587658		0.0274889	0.110955	0.121245	0.0010143	0.000770768
2002			12.	Japanese encephalitis		6.69644	6.69644	6.69644		3.44028	3.25616		1.89889	3.2382	1.509	0.0330767	0.0172695
2002			13.	Trachoma		9.68118	9.68118	9.68118		5.02266	4.65852		0.0162339	0.0648474	8.65494	0.608776	0.336386
2002			14.	Intestinal nematode infections		23.4047	23.4047	23.4047		12.0805	11.3242		2.01666	9.65724	10.6946	0.696828	0.339413
2002		B.	Respiratory infections			1449.79	1449.79	1449.79		778.03	671.755		70.4023	100.446	338.624	187.438	752.875
2002		C.	Maternal conditions			478.685	478.685	478.685		0	478.685		0	0.0153943	478.65	0.0187466	0.00156874
2002		D.	Perinatal conditions			1438.24	1438.24	1438.24		794.419	643.819		1434.13	2.21366	1.84789	0.0419447	0.00522707
2002		E.	Nutritional deficiencies			992.762	992.762	992.762		389.048	603.714		108.297	48.7019	707.756	56.8871	71.1204
			1.	Protein-energy malnutrition		97.8655	97.8655	97.8655		49.2854	48.5801		62.686	0.179756	11.0592	5.57612	18.3644
			2.	Iodine deficiency		2.51626	2.51626	2.51626		1.25038	1.26588		1.80876	0.653573	0.0358595	0.00012939	0.0179352
			3.	Vitamin A deficiency		0.0723239	0.0723239	0.0723239		0.0306532	0.0416707		0.024882	0.0276539	0	0	0.019788
			4.	Iron-deficiency anaemia		877.339	877.339	877.339		332.05	545.288		43.0004	47.0519	689.125	49.7748	48.387
2002	II.	Noncommunicable diseases				100291	100291	100291		51693.4	48597.8		2492.78	2902.67	55719.1	16039.7	23136.9
2002		A.	Malignant neoplasms			17258.1	17258.1	17258.1		9371.42	7886.69		55.7535	120.44	7790	4534.75	4757.15
2002			1.	Mouth and oropharynx cancers		411.287	411.287	411.287		319.396	91.8907		0.385143	0.526916	250.12	97.2232	63.0315
2002			2.	Oesophagus cancer		468.729	468.729	468.729		383.811	84.9183		0.0328786	0.000253927	214.818	143.934	109.944
2002			3.	Stomach cancer		1028.05	1028.05	1028.05		656.492	371.563		0.000373898	0.232248	428.078	283.065	316.678
2002			4.	Colon and rectum cancers		2051.14	2051.14	2051.14		1129.23	921.911		0.110403	0.346793	795.985	574.792	679.907
2002			5.	Liver cancer		813.261	813.261	813.261		592.887	220.374		2.93365	1.81247	342.501	250.749	215.265
2002			6.	Pancreas cancer		781.16	781.16	781.16		437.383	343.777		0.104989	0.164227	299.397	233.469	248.026
2002			7.	Trachea, bronchus, lung cancers		3497.27	3497.27	3497.27		2359.4	1137.87		0.326577	0.439431	1379.11	1102.62	1014.77
2002			8.	Melanoma and other skin cancers		297.853	297.853	297.853		180.613	117.24		0.223187	0.459907	183.232	56.5892	57.3482
2002			9.	Breast cancer		1781.66	1781.66	1781.66		11.8724	1769.78		0.00153859	0.106563	1131.31	339.375	310.861
2002			10.	Cervix uteri cancer		250.95	250.95	250.95		0	250.95		6.42309e-07	0.0412631	195.918	31.2722	23.7189
2002			11.	Corpus uteri cancer		412.455	412.455	412.455		0	412.455		7.3294e-07	0.132525	228.967	100.762	82.5929
2002			12.	Ovary cancer		441.855	441.855	441.855		0	441.855		0.0263889	0.751538	239.489	107.898	93.6892
2002			13.	Prostate cancer		708.446	708.446	708.446		708.446	0		0.0619711	0.043201	95.2423	210.192	402.907
2002			14.	Bladder cancer		414.785	414.785	414.785		315.649	99.1362		0.0698406	0.317764	119.782	114.934	179.682
2002			15.	Lymphomas, multiple myeloma		900.948	900.948	900.948		506.378	394.57		1.86003	7.181	405.061	222.822	264.024
2002			16.	Leukaemia		668.441	668.441	668.441		390.185	278.256		19.9328	42.5721	328.019	122.211	155.706
2002		B.	Other neoplasms			371.609	371.609	371.609		199.156	172.453		12.5004	12.6933	146.153	72.2628	128
2002		C.	Diabetes mellitus			3120.75	3120.75	3120.75		1595.91	1524.83		1.59351	7.45891	1755.84	639.703	716.155
2002		D.	Endocrine disorders			1713.58	1713.58	1713.58		750.898	962.678		155.577	91.7938	1037.57	168.363	260.272
2002		E.	Neuropsychiatric conditions			32278.5	32278.5	32278.5		15625	16653.5		445.039	1639.44	24356.2	1905.86	3931.97
2002			1.	Unipolar depressive disorders		10588.2	10588.2	10588.2		3953.19	6635.05		0.277497	609.15	9227.96	545.859	204.998
2002			2.	Bipolar disorder		1467.25	1467.25	1467.25		740.823	726.424		0	52.8657	1411.23	2.21747	0.929529
2002			3.	Schizophrenia		1458.04	1458.04	1458.04		770.997	687.042		0	248.995	1198.98	5.25942	4.80232
2002			4.	Epilepsy		490.473	490.473	490.473		271.358	219.115		20.6142	76.0938	341.445	28.712	23.6077
2002			5.	Alcohol use disorders		5470.7	5470.7	5470.7		4363.67	1107.03		0.109262	48.3161	5294.46	95.5719	32.2451
2002			6.	Alzheimer and other dementias		4088.48	4088.48	4088.48		1415.71	2672.77		50.8769	27.6461	249.878	730.013	3030.06
2002			7.	Parkinson disease		657.382	657.382	657.382		341.555	315.826		0.0400576	0	150.571	198.177	308.593
2002			8.	Multiple sclerosis		307.638	307.638	307.638		135.541	172.097		0	18.7626	261.519	18.4365	8.92052
2002			9.	Drug use disorders		1631.64	1631.64	1631.64		1233.39	398.254		0.118174	23.3655	1602.49	5.28434	0.381351
2002			10.	Post-traumatic stress disorder		490.463	490.463	490.463		129.63	360.833		0	5.79064	478.266	3.031	3.37492
2002			11.	Obsessive-compulsive disorder		554.959	554.959	554.959		228.685	326.274		0	7.78909	541.271	4.12675	1.77173
2002			12.	Panic disorder		757.475	757.475	757.475		255.089	502.385		0	22.0084	726.52	4.74553	4.20031
2002			13.	Insomnia (primary)		745.383	745.383	745.383		323.574	421.809		0	9.15379	597.428	87.3011	51.5007
2002			14.	Migraine		1411.21	1411.21	1411.21		360.876	1050.33		23.6244	330.627	1056.88	0.0645497	0.0149111
2002		F.	Sense organ diseases			5676.48	5676.48	5676.48		2740.34	2936.13		1.14573	5.32809	3154.6	1484.54	1030.87
2002			1.	Glaucoma		197.757	197.757	197.757		82.3162	115.441		0.213349	0.796978	104.098	57.531	35.1175
2002			2.	Cataracts		375.792	375.792	375.792		160.238	215.554		0.225942	1.78272	211.296	101.501	60.986
2002			3.	Vision disorders, age-related		1127.16	1127.16	1127.16		466.621	660.54		0.600868	2.67022	616.689	298.615	208.585
2002			4.	Hearing loss, adult onset		3973.72	3973.72	3973.72		2029.96	1943.76		0	0	2221.3	1026.64	725.778
2002		G.	Cardiovascular diseases			18283.1	18283.1	18283.1		10431.7	7851.48		72.4441	45.7749	6353.06	3840.26	7971.58
2002			1.	Rheumatic heart disease		123.415	123.415	123.415		45.4124	78.0024		0.681761	0.592834	45.1778	32.1959	44.7665
2002			2.	Hypertensive heart disease		692.857	692.857	692.857		332.006	360.851		0.268948	0.499111	211.416	122.313	358.36
2002			3.	Ischaemic heart disease		7501.5	7501.5	7501.5		4778.04	2723.47		2.02369	6.15981	2559.22	1756.68	3177.42
2002			4.	Cerebrovascular disease		5707.68	5707.68	5707.68		2948.85	2758.83		11.1272	8.94696	1901.76	1244.17	2541.67
2002			5.	Inflammatory heart diseases		722.056	722.056	722.056		466.354	255.702		20.1547	11.1211	392.228	132.922	165.631
2002		H.	Respiratory diseases			7805.84	7805.84	7805.84		4204.98	3600.86		293.244	652.619	4053.86	1131.64	1674.48
2002			1.	Chronic obstructive pulmonary disease		3872.69	3872.69	3872.69		2051.75	1820.95		2.72093	4.24152	2155.46	716.6	993.67
2002			2.	Asthma		1908.19	1908.19	1908.19		1012.03	896.154		204.48	582.423	987.427	60.8883	72.9699
2002		I.	Digestive diseases			4800.39	4800.39	4800.39		2700.64	2099.75		110.301	45.4738	2857.9	796.244	990.467
2002			1.	Peptic ulcer disease		212.822	212.822	212.822		120.155	92.667		0.42659	1.4654	115.853	33.5885	61.4894
2002			2.	Cirrhosis of the liver		1684.59	1684.59	1684.59		1179.15	505.445		2.06696	3.24356	1209.95	306.72	162.614
2002		J.	Genitourinary diseases			1454.55	1454.55	1454.55		806.299	648.251		19.6445	9.47384	612.025	284.463	528.943
2002			1.	Nephritis and nephrosis		585.338	585.338	585.338		310.679	274.659		11.6048	6.25582	188.733	116.351	262.394
2002			2.	Benign prostatic hypertrophy		278.322	278.322	278.322		278.322	0		0	0	155.041	70.6422	52.639
2002		K.	Skin diseases			203.091	203.091	203.091		84.1282	118.963		2.46694	4.32975	80.1057	28.8651	87.3235
2002		L.	Musculoskeletal diseases			4988.84	4988.84	4988.84		1998.58	2990.27		11.4465	75.962	2906.93	998.581	995.923
2002			1.	Rheumatoid arthritis		912.32	912.32	912.32		253.869	658.451		3.63505	36.4543	615.397	144.308	112.526
2002			2.	Osteoarthritis		2647.57	2647.57	2647.57		1049.94	1597.63		0	0.252625	1288.27	691.604	667.446
2002		M.	Congenital anomalies			1490.63	1490.63	1490.63		776.917	713.717		1273.79	41.1042	153.828	12.4075	9.5008
2002		N.	Oral conditions			845.685	845.685	845.685		407.519	438.166		37.8291	150.783	461.047	141.762	54.2637
2002	III.	Injuries				10640.2	10640.2	10640.2		7505.25	3134.97		424.806	791.405	8272.33	558.389	593.295
2002		A.	Unintentional injuries			7501.17	7501.17	7501.17		5133.72	2367.45		388.125	683.862	5524.57	397.678	506.939
2002			1.	Road traffic accidents		3085.27	3085.27	3085.27		2223.26	862.011		72.2279	194.779	2628.26	111.725	78.2842
2002			2.	Poisonings		484.247	484.247	484.247		347.516	136.731		4.44623	5.95723	455.041	11.6855	7.11627
2002			3.	Falls		1239.78	1239.78	1239.78		795.831	443.948		72.0357	112.079	724.03	100.878	230.757
2002			4.	Fires		197.199	197.199	197.199		130.665	66.5336		27.3284	27.9009	120.059	10.6074	11.3035
2002			5.	Drownings		275.142	275.142	275.142		212.997	62.145		40.5593	31.1131	170.366	16.0744	17.0297
2002			6.	Other unintentional injuries		2219.53	2219.53	2219.53		1423.45	796.079		171.527	312.032	1426.81	146.707	162.448
2002		B.	Intentional injuries			3139.06	3139.06	3139.06		2371.53	767.524		36.6818	107.543	2747.76	160.711	86.3564
2002			1.	Self-inflicted injuries		2326.74	2326.74	2326.74		1749.44	577.297		0	69.0147	2026.82	150.057	80.8413
2002			2.	Violence		779.849	779.849	779.849		592.205	187.644		36.5314	37.3767	690.435	10.189	5.31646
2002			3.	War		20.3454	20.3454	20.3454		18.1869	2.15841		0.146173	0.985102	18.7356	0.371054	0.107378
2015	Population (millions)					975.884	923.692	920.299		473.468	502.416		53.769	110.487	582.332	109.15	120.145
2015		All Causes				118198	114342	122481		61515.2	56683		3463.16	3383.87	63503.4	19304.2	28543.6
2015	I.	Communicable, maternal, perinatal and nutritional conditions				5087.48	4609.86	5681.47		2634.47	2453.01		1160.02	165.423	2252.35	389.944	1119.74
2015		A.	Infectious and parasitic diseases			2046.35	1899.15	2288.22		1191.77	854.582		221.738	74.7695	1291.68	178.152	280.007
2015			1.	Tuberculosis		75.1651	68.7636	86.0297		48.8726	26.2925		0.42443	0.972189	31.0459	11.3688	31.3537
2015			2.	STDs excluding HIV		133.945	117.681	144.225		20.8179	113.127		1.86141	1.79377	128.524	0.66833	1.09711
2015			3.	HIV/AIDS		585.847	509.661	588.825		443.658	142.189		2.15564	3.20732	563.969	14.4528	2.06234
2015			4.	Diarrhoeal diseases		238.109	304.618	308.787		120.086	118.023		62.9337	19.0159	117.232	15.9915	22.9362
2015			5.	Childhood-cluster diseases		114.738	108.223	123.475		56.0943	58.6435		108.185	2.19229	1.83786	1.09253	1.43028
2015				a.	Pertussis	109.41	103.449	117.429		53.4635	55.9463		107.865	1.53638	0.0087221	0	0
2015				d.	Measles	1.1069	0.95847	1.42748		0.611814	0.49509		0.302359	0.580564	0.223981	0	0
2015				e.	Tetanus	0.488541	0.437852	0.566459		0.197059	0.291482		0.00718735	0.00101799	0.14898	0.106052	0.225304
2015			6.	Meningitis		59.427	48.7635	71.9577		31.6667	27.7603		18.6746	6.28987	24.3122	5.18926	4.96113
2015			7.	Hepatitis B and C		145.724	127.726	165.35		91.583	54.1412		0.226616	0.134581	81.8432	31.6398	31.8799
2015			8.	Malaria		1.28879	1.11429	1.51345		0.803957	0.484831		0.0716619	0.113375	0.967671	0.0828952	0.0531849
2015			9.	Tropical-cluster diseases		118.613	109.369	163.069		102.73	15.8828		2.32533	12.1695	102.258	1.18198	0.677602
2015			10.	Leprosy		0.421269	0.393759	0.440839		0.271788	0.149481		0.000691797	0.00994578	0.0837244	0.0572252	0.269682
2015			11.	Dengue		0.128951	0.108539	0.161889		0.103393	0.0255572		0.00847216	0.0413134	0.0767416	0.00161643	0.000807154
2015			12.	Japanese encephalitis		2.67973	2.42909	3.78493		1.39527	1.28446		0.721039	1.19636	0.716448	0.0254937	0.020389
2015			13.	Trachoma		6.457	5.72868	7.78211		3.20783	3.24917		0.0076218	0.0244461	5.03807	1.01878	0.368078
2015			14.	Intestinal nematode infections		12.7276	11.7975	16.2158		6.64571	6.08189		0.919237	4.24195	6.4638	0.649922	0.452696
2015		B.	Respiratory infections			1259	1146.16	1348.59		679.724	579.276		30.043	60.9267	238.781	157.526	771.723
2015		C.	Maternal conditions			237.208	197.771	292.251		0	237.208		0	0.0153943	237.176	0.0138179	0.0021121
2015		D.	Perinatal conditions			846.711	745.719	970.935		468.11	378.601		844.32	1.26497	1.08603	0.0346455	0.00500112
2015		E.	Nutritional deficiencies			698.211	621.069	781.483		294.869	403.341		63.9146	28.4462	483.629	54.2172	68.0033
2015			1.	Protein-energy malnutrition		64.4014	58.1501	72.0283		31.6438	32.7576		35.6877	0.109679	6.71391	4.57948	17.3106
2015			2.	Iodine deficiency		1.38034	1.19647	1.57931		0.679613	0.700727		0.982527	0.360598	0.0187385	9.17304e-05	0.0183852
2015			3.	Vitamin A deficiency		0.0413906	0.0381125	0.0495178		0.0156238	0.0257668		0.0113704	0.0122319	0	0	0.0177883
2015			4.	Iron-deficiency anaemia		621.461	552.06	695.753		257.858	363.602		26.8864	27.4848	472.188	48.5029	46.3986
2015	II.	Noncommunicable diseases				103642	100785	106228		52410.1	51232.4		2020.61	2654.2	53974.7	18291	26701.9
2015		A.	Malignant neoplasms			17803	17629.5	17951.4		9713.77	8089.25		36.4886	86.9911	7282.76	5131.29	5265.49
2015			1.	Mouth and oropharynx cancers		409.488	404.582	412.821		315.58	93.9079		0.245493	0.358112	232.775	105.857	70.2516
2015			2.	Oesophagus cancer		482.07	479.357	482.146		392.171	89.8987		0.0224027	0.000253927	200.94	159.552	121.556
2015			3.	Stomach cancer		1065.92	1060.88	1066.43		681.905	384.014		0.000373898	0.152934	388.758	295.351	381.656
2015			4.	Colon and rectum cancers		2108.23	2099.9	2105.91		1167.82	940.406		0.0853287	0.247427	736.885	619.489	751.521
2015			5.	Liver cancer		844.442	839.962	845.753		608.743	235.699		1.80698	1.27342	329.941	266.391	245.03
2015			6.	Pancreas cancer		808.581	804.218	809.171		454.916	353.665		0.0715241	0.107993	276.561	255.376	276.464
2015			7.	Trachea, bronchus, lung cancers		3822.39	3763.48	3895.16		2459.11	1363.28		0.00140824	0.00355884	1453.04	1317.34	1052.01
2015			8.	Melanoma and other skin cancers		290.964	287.117	293.934		182.711	108.254		0.136932	0.321652	160.318	64.7638	65.4238
2015			9.	Breast cancer		1736.79	1707.97	1767.02		12.4618	1724.32		0.0015412	0.0788552	1018.28	390.99	327.435
2015			10.	Cervix uteri cancer		223.516	216.656	231.661		0	223.516		6.80988e-07	0.0313555	159.888	36.9212	26.6756
2015			11.	Corpus uteri cancer		415.706	409.979	421.846		0	415.706		7.3294e-07	0.102154	207.234	119.29	89.0799
2015			12.	Ovary cancer		417.796	409.843	426.018		0	417.796		0.0263228	0.525564	204.321	117.216	95.7061
2015			13.	Prostate cancer		808.669	815.33	794.404		808.669	0		0.06199	0.0311336	93.8061	239.709	475.061
2015			14.	Bladder cancer		452.954	453.094	450.226		343.633	109.321		0.0509758	0.249866	114.981	128.748	208.925
2015			15.	Lymphomas, multiple myeloma		918.251	913.158	919.287		517.494	400.757		1.09042	4.8687	372.098	258.499	281.695
2015			16.	Leukaemia		650.494	643.199	658.62		383.6	266.894		13.1179	29.882	291.834	143.576	172.083
2015		B.	Other neoplasms			376.324	373.273	379.205		203.065	173.259		7.86729	8.8507	129.309	80.9633	149.334
2015		C.	Diabetes mellitus			5204.93	4758.09	5621.45		2369.83	2835.1		1.44208	6.40172	3020.64	1025.89	1150.56
2015		D.	Endocrine disorders			1551.63	1459.3	1660.93		694.857	856.774		104.231	66.3658	888.996	191.341	300.697
2015		E.	Neuropsychiatric conditions			33433.6	33331.3	33567.7		15898.2	17535.4		369.808	1549.71	24154.2	2418.56	4941.3
2015			1.	Unipolar depressive disorders		10988.6	10997.3	10976.4		4043.32	6945.25		0.233379	583.757	9412.45	748.702	243.436
2015			2.	Bipolar disorder		1395.72	1388.15	1407.41		703.002	692.716		0	49.712	1342.26	2.75919	0.983692
2015			3.	Schizophrenia		1403.89	1397.46	1414.22		737.184	666.705		0	230.716	1161.26	6.34073	5.57133
2015			4.	Epilepsy		460.841	448.21	476.54		252.85	207.991		17.824	68.7508	314.328	32.7629	27.175
2015			5.	Alcohol use disorders		5413.72	5398.81	5429.5		4313.58	1100.15		0.0918425	46.727	5219.05	111.472	36.3815
2015			6.	Alzheimer and other dementias		5149.84	5161.38	5144.1		1795.59	3354.25		48.251	25.4042	262.443	921.757	3891.99
2015			7.	Parkinson disease		709.829	687.798	737.488		373.815	336.014		0.0335711	0	138.041	218.834	352.92
2015			8.	Multiple sclerosis		297.81	292.699	303.64		132.086	165.724		0	18.1001	248.769	21.432	9.50876
2015			9.	Drug use disorders		1596.52	1578.38	1616.79		1205.79	390.728		0.0964883	21.7242	1567.52	6.72868	0.444515
2015			10.	Post-traumatic stress disorder		487.904	488.158	487.562		126.488	361.415		0	5.47428	474.496	3.91113	4.0222
2015			11.	Obsessive-compulsive disorder		540.15	539.551	541.02		221.065	319.085		0	7.59854	525.257	5.2423	2.05259
2015			12.	Panic disorder		741.701	739.867	744.491		248.607	493.094		0	20.7891	709.954	6.10803	4.84935
2015			13.	Insomnia (primary)		778.987	780.057	777.753		332.355	446.633		0	8.70385	598.401	112.331	59.551
2015			14.	Migraine		1335.98	1330.34	1343.69		340.014	995.967		23.5204	318.455	993.908	0.0808114	0.0164672
2015		F.	Sense organ diseases			6370.21	6491.71	6512.58		3019.12	3351.09		1.01274	4.48115	3282.9	1888.36	1193.46
2015			1.	Glaucoma		240.94	241.557	239.949		98.0089	142.931		0.212664	0.809965	121.987	74.2003	43.7302
2015			2.	Cataracts		399.449	474.191	470.844		167.916	231.533		0.169115	1.33813	209.572	115.402	72.9679
2015			3.	Vision disorders, age-related		1309.43	1368.85	1360.31		532.92	776.515		0.552801	2.27023	672.443	382.121	252.048
2015			4.	Hearing loss, adult onset		4418.43	4405.27	4439.42		2219.11	2199.32		0	0	2277.82	1316.37	824.24
2015		G.	Cardiovascular diseases			17451.2	16399.9	17930.2		9813.84	7637.34		63.3119	32.5904	5083.41	3689.56	8582.31
2015			1.	Rheumatic heart disease		110.489	103.51	121.069		41.836	68.653		0.610704	0.420403	33.2323	29.5924	46.6332
2015			2.	Hypertensive heart disease		671.095	637.578	732.808		327.856	343.239		0.240362	0.391039	150.806	112.52	407.138
2015			3.	Ischaemic heart disease		7283.27	6990.73	7506.27		4509.02	2774.25		1.94587	5.22878	2158.56	1728.81	3388.73
2015			4.	Cerebrovascular disease		5368.32	4875.15	5246.24		2723.68	2644.64		9.90621	6.11475	1507.02	1176.77	2668.51
2015			5.	Inflammatory heart diseases		621.941	580.484	684.922		405.666	216.275		17.4502	7.66473	299.046	126.687	171.092
2015		H.	Respiratory diseases			7414.65	6910.85	7876.68		3949.46	3465.19		273.791	617.34	3402.19	1202.59	1918.74
2015			1.	Chronic obstructive pulmonary disease		3507.77	3181.52	3808.91		1826.91	1680.86		2.21564	3.54052	1660.48	747.054	1094.48
2015			2.	Asthma		1899.71	1883.14	1914.72		1001.04	898.673		200.622	561.156	968.112	71.673	98.1477
2015		I.	Digestive diseases			4653.29	4191.87	5159.2		2577.33	2075.96		57.3343	23.7262	2525.62	833.693	1212.91
2015			1.	Peptic ulcer disease		213.396	194.869	231.962		119.122	94.2743		0.231092	0.772688	99.9124	35.5693	76.9107
2015			2.	Cirrhosis of the liver		1574.97	1386.94	1801.34		1100.87	474.101		1.13428	1.61916	1087.04	301.387	183.788
2015		J.	Genitourinary diseases			1527.44	1474.25	1602.74		887.921	639.523		13.6235	6.48039	545.511	326.108	635.721
2015			1.	Nephritis and nephrosis		618.643	594.242	655.583		333.09	285.554		7.89332	3.9083	154.388	131.842	320.611
2015			2.	Benign prostatic hypertrophy		331.143	332.312	329.599		331.143	0		0	0	178.964	86.9256	65.2532
2015		K.	Skin diseases			235.338	233.779	237.561		96.9702	138.368		2.09944	3.8016	81.0897	36.9261	111.422
2015		L.	Musculoskeletal diseases			5481.65	5452.18	5528.89		2112.29	3369.36		10.8031	72.7623	2965.38	1267.44	1165.27
2015			1.	Rheumatoid arthritis		992.14	988.096	997.976		274.57	717.569		3.75153	36.0474	637.854	183.729	130.757
2015			2.	Osteoarthritis		3003.99	2996.1	3017.46		1146.24	1857.76		0	0.228052	1353.43	882.05	768.29
2015		M.	Congenital anomalies			1230.07	1168.2	1292.08		643.672	586.398		1043.29	29.7264	131.916	14.4729	10.6674
2015		N.	Oral conditions			909.174	910.461	907.529		429.744	479.43		35.5103	144.974	480.827	183.831	64.0319
2015	III.	Injuries				9468.24	8947.15	10571.2		6470.66	2997.58		282.53	564.246	7276.25	623.231	721.985
2015		A.	Unintentional injuries			6238.82	5740.05	7198.8		3995.29	2243.53		244.753	460.679	4479.43	428.721	625.241
2015			1.	Road traffic accidents		2629.87	2383.39	2994.83		1786.79	843.077		49.1472	140.968	2255.41	108.251	76.0977
2015			2.	Poisonings		371.787	329.952	451.288		250.567	121.221		2.66678	4.19699	342.77	13.5079	8.64507
2015			3.	Falls		1131.98	1047.82	1235.64		674.47	457.511		48.0483	75.7995	593.436	117.182	297.516
2015			4.	Fires		161.337	146.848	185.584		100.571	60.7656		17.5648	21.1218	96.378	12.2277	14.0443
2015			5.	Drownings		197.334	175.769	240.918		143.889	53.4452		24.6752	17.2545	117.536	15.9223	21.9458
2015			6.	Other unintentional injuries		1746.51	1656.27	2090.54		1039	707.514		102.651	201.339	1073.9	161.63	206.992
2015		B.	Intentional injuries			3229.42	3207.1	3372.44		2475.37	754.046		37.7766	103.567	2796.82	194.51	96.7445
2015			1.	Self-inflicted injuries		2481.66	2439.62	2509.31		1900.92	580.734		0	69.9656	2138.91	181.74	91.044
2015			2.	Violence		708.662	732.088	819.077		538.339	170.323		37.6255	32.3836	621.224	12.0049	5.42372
2015			3.	War		23.7697	20.8928	28.537		21.294	2.47568		0.14684	1.04564	21.8192	0.616358	0.141608
2030	Population (millions)					1002.89	955.009	940.022		477.743	525.149		54.8615	110.984	553.497	123.823	159.727
2030		All Causes				112846	106770	119556		56893.2	55953.1		2543.9	3082.22	54526.5	18385.8	34308
2030	I.	Communicable, maternal, perinatal and nutritional conditions				3717.07	3075.25	4374.51		1943.88	1773.19		669.823	102.468	1560.67	279.779	1104.32
2030		A.	Infectious and parasitic diseases			1614.59	1328.53	1886.88		944.255	670.334		154.447	46.6316	993.702	127.966	291.842
2030			1.	Tuberculosis		45.6094	38.8808	56.4997		27.5094	18.1		0.221128	0.746201	13.728	5.97426	24.9398
2030			2.	STDs excluding HIV		92.6883	71.6641	105.304		15.3015	77.3868		1.31425	1.29257	88.3721	0.521203	1.1882
2030			3.	HIV/AIDS		598.912	332.643	595.899		448.1	150.812		2.33092	3.58062	572.919	16.9805	3.10134
2030			4.	Diarrhoeal diseases		178.219	298.505	300.368		89.0195	89.1991		44.7069	13.3632	80.6371	14.0167	25.4948
2030			5.	Childhood-cluster diseases		93.9907	90.1136	99.871		45.34	48.6507		88.9407	1.86842	0.832982	0.718874	1.62978
2030				a.	Pertussis	90.3246	86.9897	95.6097		43.6357	46.6889		88.7912	1.52959	0.00376835	0	0
2030				d.	Measles	0.591373	0.49232	0.814051		0.319504	0.271869		0.144329	0.314624	0.13242	0	0
2030				e.	Tetanus	0.352628	0.300848	0.423131		0.129991	0.222637		0.00215992	0.00101799	0.066967	0.07137	0.211113
2030			6.	Meningitis		29.9205	21.6588	40.8877		15.7904	14.1302		5.76534	3.4065	12.2595	3.44166	5.04757
2030			7.	Hepatitis B and C		92.3524	73.9266	113.052		54.5566	37.7959		0.0694943	0.0667499	43.5064	19.4962	29.2136
2030			8.	Malaria		0.790386	0.647528	1.00495		0.457062	0.333323		0.040767	0.105069	0.524577	0.0601649	0.0598074
2030			9.	Tropical-cluster diseases		59.3853	52.1645	91.2219		52.4926	6.89269		1.17454	5.65133	50.8042	1.06073	0.694523
2030			10.	Leprosy		0.382	0.341693	0.386315		0.228468	0.153532		0.000345775	0.0044954	0.0396419	0.0430532	0.294464
2030			11.	Dengue		0.0642581	0.0448982	0.0950221		0.0520911	0.0121671		0.00201987	0.01695	0.0423576	0.00165037	0.00128038
2030			12.	Japanese encephalitis		1.30301	1.10797	2.09399		0.690457	0.61255		0.364577	0.553548	0.339017	0.0232764	0.022589
2030			13.	Trachoma		4.23274	3.39369	5.6824		1.77717	2.45557		0.00322882	0.00996525	2.27712	1.12434	0.818085
2030			14.	Intestinal nematode infections		7.69104	6.76574	10.5964		4.02747	3.66358		0.553616	2.31819	3.58305	0.629862	0.606326
2030		B.	Respiratory infections			1051.28	920.636	1149.77		531.48	519.799		13.0485	37.7745	149.646	110.69	740.12
2030		C.	Maternal conditions			112.126	84.7521	162.434		0	112.126		0	0.0153943	112.102	0.00693645	0.00230968
2030		D.	Perinatal conditions			464.547	356.428	602.513		257.304	207.243		463.215	0.696861	0.596926	0.0318763	0.0067569
2030		E.	Nutritional deficiencies			474.524	384.897	572.916		210.841	263.684		39.1125	17.3498	304.626	41.0847	72.3509
2030			1.	Protein-energy malnutrition		45.2895	38.2678	53.229		20.7475	24.542		21.8299	0.0616759	3.58019	2.7059	17.1118
2030			2.	Iodine deficiency		0.798365	0.609197	1.02491		0.39167	0.406695		0.572855	0.1961	0.00948311	7.54674e-05	0.0198514
2030			3.	Vitamin A deficiency		0.0306741	0.0269255	0.0378505		0.0108656	0.0198085		0.00678444	0.00667128	0	0	0.0172184
2030			4.	Iron-deficiency anaemia		420.494	339.486	509.557		186.615	233.879		16.5443	16.7943	298.411	37.6754	51.0691
2030	II.	Noncommunicable diseases				100702	96160	104817		49395.8	51306.2		1693.72	2570.68	46650.3	17504.9	32282.4
2030		A.	Malignant neoplasms			16544.3	16452.5	16568		9079.74	7464.57		22.2334	61.202	5551.61	4775.41	6133.84
2030			1.	Mouth and oropharynx cancers		364.368	361.568	364.265		277.495	86.8722		0.142402	0.23862	176.667	103.225	84.0951
2030			2.	Oesophagus cancer		455.285	457.804	447.408		365.955	89.3302		0.0126609	0.000253927	158.898	151.446	144.929
2030			3.	Stomach cancer		1016.13	1022.13	995.713		642.898	373.236		0.000373898	0.0938615	307.383	282.483	426.174
2030			4.	Colon and rectum cancers		2010.86	2029.63	1969.47		1112.35	898.512		0.0720212	0.17644	574.611	567.36	868.643
2030			5.	Liver cancer		798.771	801.199	786.042		566.381	232.39		1.02395	0.849363	271.191	252.58	273.127
2030			6.	Pancreas cancer		776.826	781.21	763.751		434.174	342.651		0.0403786	0.0700996	212.025	238.142	326.548
2030			7.	Trachea, bronchus, lung cancers		3329.15	3258.52	3440.96		2105.97	1223.18		0.00140824	0.00355884	1056.21	1134.8	1138.14
2030			8.	Melanoma and other skin cancers		267.256	264.187	268.109		173.02	94.2357		0.080108	0.205702	122.432	60.7954	83.7432
2030			9.	Breast cancer		1536.14	1491.8	1577.54		12.1421	1523.99		0.0015413	0.0505696	765.184	368.666	402.233
2030			10.	Cervix uteri cancer		182.926	172.573	194.304		0	182.926		6.94512e-07	0.0227386	113.228	36.416	33.259
2030			11.	Corpus uteri cancer		380.657	372.263	388.227		0	380.657		7.3294e-07	0.0850043	155.193	114.804	110.575
2030			12.	Ovary cancer		356.261	345.503	365.989		0	356.261		0.0262434	0.364723	140.568	102.579	112.723
2030			13.	Prostate cancer		873.826	910.604	824.503		873.826	0		0.0619643	0.0215283	74.8246	233.827	565.09
2030			14.	Bladder cancer		470.03	479.463	455.612		350.951	119.079		0.0351697	0.192151	91.836	126.436	251.531
2030			15.	Lymphomas, multiple myeloma		880.632	884.797	867.641		497.315	383.317		0.595025	3.10131	294.724	249.499	332.713
2030			16.	Leukaemia		611.371	606.184	614.842		364.716	246.654		8.02251	20.2286	231.231	144.51	207.378
2030		B.	Other neoplasms			366.899	367.735	364.488		195.905	170.994		4.47017	5.60166	100.225	78.2934	178.308
2030		C.	Diabetes mellitus			5080.81	4226.69	5862.79		2291.84	2788.96		1.26741	5.6537	2495.57	1023.12	1555.19
2030		D.	Endocrine disorders			1358.74	1208.63	1533.33		615.365	743.377		68.5159	48.6542	681.217	172.855	387.5
2030		E.	Neuropsychiatric conditions			34292.1	34238.5	34369.6		15877	18415.1		326.397	1542.28	23228.7	2642.91	6551.82
2030			1.	Unipolar depressive disorders		11057.8	11093.9	11010.9		4047.63	7010.15		0.177439	590.646	9266.65	861.356	338.956
2030			2.	Bipolar disorder		1312.61	1298.73	1330.93		660.269	652.338		0	49.4546	1258.91	2.97218	1.2684
2030			3.	Schizophrenia		1331.07	1319.45	1346.88		698.582	632.487		0	222.364	1094.53	6.76029	7.41422
2030			4.	Epilepsy		424.689	403.802	450.178		230.196	194.493		16.2788	65.5863	274.206	34.8405	33.7779
2030			5.	Alcohol use disorders		5248.82	5233.08	5262.97		4172.07	1076.75		0.0697758	47.945	5036.77	117.846	46.1886
2030			6.	Alzheimer and other dementias		6495.11	6597.59	6394.02		2138.19	4356.92		47.9338	24.7266	240.575	1024.47	5157.4
2030			7.	Parkinson disease		747.64	707.485	795.045		390.157	357.483		0.0253969	0	105.608	197.566	444.44
2030			8.	Multiple sclerosis		275.597	266.878	285.405		123.558	152.038		0	18.4661	224.067	20.3792	12.6843
2030			9.	Drug use disorders		1534.31	1505.32	1566.46		1157.3	377.005		0.0740997	21.7832	1504.39	7.48372	0.575836
2030			10.	Post-traumatic stress disorder		469.569	470.511	468.365		121.442	348.127		0	5.43891	454.19	4.53528	5.40476
2030			11.	Obsessive-compulsive disorder		523.596	522.864	524.474		212.76	310.836		0	7.67406	507.005	6.17516	2.74185
2030			12.	Panic disorder		706.416	703.269	710.509		236.25	470.166		0	20.6784	672.366	6.90981	6.46209
2030			13.	Insomnia (primary)		785.33	789.721	780.318		330.409	454.92		0	8.72817	570.919	126.602	79.0807
2030			14.	Migraine		1281.72	1271.31	1294.72		327.692	954.031		23.7865	321.376	936.451	0.0900622	0.0190175
2030		F.	Sense organ diseases			6680.72	7013.86	6968.92		3115.58	3565.13		0.906679	3.82589	2971.35	2117.21	1587.43
2030			1.	Glaucoma		269.637	272.422	265.359		105.221	164.416		0.214098	0.815628	112.663	94.5337	61.4112
2030			2.	Cataracts		376.194	552.644	537.659		154.962	221.232		0.122636	0.944083	156.563	120.337	98.2264
2030			3.	Vision disorders, age-related		1377.41	1535.82	1497.83		546.832	830.578		0.512413	2.01576	592.59	436.471	345.822
2030			4.	Hearing loss, adult onset		4655.65	4651.33	4666.06		2307.49	2348.16		0	0	2108.69	1465.61	1081.36
2030		G.	Cardiovascular diseases			15914.7	13842.6	16907.3		8366.7	7548		53.6995	23.9486	3391.54	2978.81	9466.69
2030			1.	Rheumatic heart disease		93.9143	82.3904	110.177		33.8751	60.0392		0.528983	0.316011	19.1466	22.995	50.9277
2030			2.	Hypertensive heart disease		638.296	580.915	731.558		286.008	352.288		0.215702	0.305904	87.298	90.744	459.733
2030			3.	Ischaemic heart disease		6601.97	5892.69	7126.73		3794.8	2807.17		1.77167	4.54563	1456.1	1397.01	3742.54
2030			4.	Cerebrovascular disease		5034.7	4120.34	4896.43		2407.82	2626.88		8.74323	4.47984	1045.23	970.621	3005.62
2030			5.	Inflammatory heart diseases		507.589	438.607	605.592		323.912	183.677		14.7379	5.34897	196.887	98.7829	191.833
2030		H.	Respiratory diseases			6559.08	5779.08	7304.38		3487.45	3071.63		265.315	617.292	2518.55	970.727	2187.19
2030			1.	Chronic obstructive pulmonary disease		2785.14	2307.85	3256.47		1468.01	1317.13		1.82778	2.97771	1032.93	549.22	1198.19
2030			2.	Asthma		1888.29	1861.26	1912.92		983.85	904.441		204.654	571.649	912.137	74.7233	125.128
2030		I.	Digestive diseases			4388.03	3715	5173.15		2267.39	2120.64		26.0691	11.8062	1940.47	761.983	1647.7
2030			1.	Peptic ulcer disease		209.954	183.361	238.337		110.916	99.0381		0.119757	0.395625	75.386	33.4367	100.616
2030			2.	Cirrhosis of the liver		1343.04	1059.05	1713.46		917.174	425.862		0.548778	0.787774	834.462	270.253	236.984
2030		J.	Genitourinary diseases			1554.43	1473.47	1663.5		900.88	653.547		9.12762	4.76446	415.26	314.427	810.847
2030			1.	Nephritis and nephrosis		639.279	600.043	694.134		334.583	304.696		5.05541	2.54226	105.822	122.346	403.513
2030			2.	Benign prostatic hypertrophy		344	349.344	337.448		344	0		0	0	165.384	96.4873	82.1279
2030		K.	Skin diseases			266.35	265.722	267.571		105.023	161.327		2.00517	3.68726	73.4181	40.6646	146.575
2030		L.	Musculoskeletal diseases			5738.12	5707.42	5786.55		2121.21	3616.91		10.5779	73.8236	2721.84	1403.13	1528.75
2030			1.	Rheumatoid arthritis		1004.3	999.646	1010.75		277.366	726.938		3.82555	37.6586	589.406	203.482	169.932
2030			2.	Osteoarthritis		3239.19	3238.63	3244.53		1187.3	2051.89		0	0.216628	1249.57	981.93	1007.48
2030		M.	Congenital anomalies			1020.69	926.117	1116.86		537.291	483.398		867.282	21.8737	104.764	13.1333	13.6367
2030		N.	Oral conditions			937.035	942.606	930.131		434.438	502.597		35.8512	146.263	455.784	212.239	86.8973
2030	III.	Injuries				8427.28	7534.55	10364.4		5553.54	2873.75		180.356	409.071	6315.49	601.089	921.275
2030		A.	Unintentional injuries			4927.33	4071.73	6452.03		2836.9	2090.43		141.355	300.962	3293.69	392.804	798.522
2030			1.	Road traffic accidents		2042.99	1602.06	2684.82		1270.78	772.201		30.4605	96.5505	1755.68	86.0906	74.2028
2030			2.	Poisonings		268.696	199.057	392.354		164.2	104.496		1.42453	2.96812	239.619	12.663	12.0218
2030			3.	Falls		1032.8	887.912	1179.47		545.096	487.708		31.3592	50.696	439.37	119.139	392.24
2030			4.	Fires		125.838	102.335	162.166		70.8761	54.9614		10.0592	15.9671	69.2704	11.6635	18.8773
2030			5.	Drownings		132.497	103.444	189.831		87.5559	44.9411		13.2309	9.48964	71.6652	13.1142	24.9971
2030			6.	Other unintentional injuries		1324.51	1176.92	1843.38		698.388	626.124		54.8205	125.29	718.084	150.134	276.183
2030		B.	Intentional injuries			3499.95	3462.82	3912.39		2716.64	783.315		39.0011	108.11	3021.8	208.286	122.753
2030			1.	Self-inflicted injuries		2725.14	2647.62	2782.84		2118.63	606.508		0	73.6863	2342.69	193.961	114.802
2030			2.	Violence		728.546	777.713	1077.67		555.074	173.472		38.8484	33.2129	635.653	13.3214	7.51016
2030			3.	War		25.9152	18.8083	31.0143		23.2144	2.7008		0.148549	1.03969	23.6641	0.824482	0.238421

## Sheet: Latin America and Caribbean
DALYs by cause, scenario, sex and age for the years 2002, 2015 and 2030
Source: Mathers CD, Loncar D (2006). Projections of global mortality and burden of disease from 2002 to 2030.
Latin America and Caribbean
						Total DALYs ('000)				Baseline DALYs ('000)			Baseline projections ('000) by age group
Year		Cause				Baseline	Optimistic	Pessimistic		Male	Female		0-4	5-14	15-59	60-69	70+
2002	Population (millions)					529.932	529.932	529.932		262.249	267.683		55.5976	109.204	321.866	24.2321	19.033
2002		All Causes				100217	100217	100217		55627.8	44589.4		20423.4	7278.16	58415.9	7380.08	6719.6
2002	I.	Communicable, maternal, perinatal and nutritional conditions				24095.4	24095.4	24095.4		12415	11680.4		13003	1319.55	8784.18	456.181	532.474
2002		A.	Infectious and parasitic diseases			11100.2	11100.2	11100.2		6321.59	4778.61		3639.49	890.979	6067.79	282.318	219.626
2002			1.	Tuberculosis		912.585	912.585	912.585		560.937	351.649		39.4768	49.1596	713.029	69.7641	41.1565
2002			2.	STDs excluding HIV		650.404	650.404	650.404		185.546	464.858		56.8708	9.24266	582.585	0.861425	0.844473
2002			3.	HIV/AIDS		3019.94	3019.94	3019.94		2057.24	962.705		204.796	105.418	2692.91	15.0672	1.75403
2002			4.	Diarrhoeal diseases		2253.25	2253.25	2253.25		1172.73	1080.52		1733.16	243.364	236.661	19.8463	20.2152
2002			5.	Childhood-cluster diseases		339.257	339.257	339.257		171.316	167.942		320.514	11.0725	7.09967	0.358631	0.212151
2002				a.	Pertussis	309.784	309.784	309.784		154.289	155.495		302.829	6.92329	0.0315673	0	0
2002				d.	Measles	0.0222273	0.0222273	0.0222273		0.0111122	0.0111152		0.0111897	0.0110376	0	0	0
2002				e.	Tetanus	14.2164	14.2164	14.2164		7.5904	6.62602		11.3268	0.558318	1.89512	0.252647	0.183565
2002			6.	Meningitis		638.176	638.176	638.176		363.803	274.373		415.345	79.6518	128.107	9.0767	5.99456
2002			7.	Hepatitis B and C		123.97	123.97	123.97		80.5152	43.4552		17.5522	8.02051	83.1815	10.2343	4.98192
2002			8.	Malaria		140.396	140.396	140.396		74.6691	65.7269		54.9666	35.6985	46.4983	2.05037	1.18223
2002			9.	Tropical-cluster diseases		785.789	785.789	785.789		419.537	366.253		7.16559	23.2123	695.87	40.4241	19.1171
2002			10.	Leprosy		18.0998	18.0998	18.0998		9.85445	8.24539		0.324612	4.46243	11.6041	0.838075	0.870657
2002			11.	Dengue		68.7515	68.7515	68.7515		34.5764	34.1751		13.1823	48.4754	6.16425	0.520407	0.40918
2002			12.	Japanese encephalitis		0	0	0		0	0		0	0	0	0	0
2002			13.	Trachoma		161.648	161.648	161.648		40.4566	121.192		0.583398	1.30814	116.396	25.9693	17.3918
2002			14.	Intestinal nematode infections		188.594	188.594	188.594		93.5337	95.0604		52.8503	113.179	20.5434	1.21038	0.811062
2002		B.	Respiratory infections			2961.45	2961.45	2961.45		1599.32	1362.13		1731.21	264.753	594.49	131.378	239.617
2002		C.	Maternal conditions			1702.65	1702.65	1702.65		0	1702.65		0.0505804	8.00347	1694.58	0	0.0146084
2002		D.	Perinatal conditions			6694	6694	6694		3696.16	2997.84		6693.61	0.23799	0.150599	0	0.00270571
2002		E.	Nutritional deficiencies			1637.06	1637.06	1637.06		797.912	839.15		938.609	155.579	427.176	42.4851	73.2134
			1.	Protein-energy malnutrition		913.318	913.318	913.318		483.964	429.354		704.319	38.626	97.986	23.4207	48.966
			2.	Iodine deficiency		135.878	135.878	135.878		66.74	69.138		99.5367	36.0641	0.209386	0.0275923	0.0401261
			3.	Vitamin A deficiency		0.579368	0.579368	0.579368		0.23514	0.344228		0.439986	0	0.117506	0.00969606	0.0121799
			4.	Iron-deficiency anaemia		542.75	542.75	542.75		221.783	320.967		120.356	78.1144	309.616	15.6016	19.062
2002	II.	Noncommunicable diseases				60763.3	60763.3	60763.3		30693.8	30069.4		6392.58	4240.1	37452	6651.79	6026.79
2002		A.	Malignant neoplasms			5461.62	5461.62	5461.62		2535.24	2926.38		109.622	205.672	3212.95	1077.09	856.277
2002			1.	Mouth and oropharynx cancers		156.518	156.518	156.518		119.042	37.4761		0.618355	1.09327	99.4256	34.8793	20.5012
2002			2.	Oesophagus cancer		154.244	154.244	154.244		117.825	36.4191		0	0.0702366	85.1326	41.7542	27.2869
2002			3.	Stomach cancer		533.765	533.765	533.765		312.958	220.806		0.631786	1.97618	296.253	125.979	108.925
2002			4.	Colon and rectum cancers		350.348	350.348	350.348		168.948	181.4		0.456957	0.766178	193.991	79.5343	75.5996
2002			5.	Liver cancer		201.456	201.456	201.456		103.809	97.6469		3.84919	2.8175	106.482	49.5737	38.7341
2002			6.	Pancreas cancer		173.063	173.063	173.063		86.6413	86.422		0.101591	0.387429	82.4248	49.2282	40.9213
2002			7.	Trachea, bronchus, lung cancers		515.304	515.304	515.304		342.953	172.352		0.825893	1.61445	262.753	150.533	99.5784
2002			8.	Melanoma and other skin cancers		75.5636	75.5636	75.5636		42.3989	33.1648		0.101319	0.819857	48.1755	13.0157	13.4512
2002			9.	Breast cancer		504.811	504.811	504.811		3.25407	501.557		0.165756	0.0764717	375.48	78.9716	50.1167
2002			10.	Cervix uteri cancer		401.838	401.838	401.838		0	401.838		0	0.00307457	317.796	53.1934	30.8456
2002			11.	Corpus uteri cancer		203.633	203.633	203.633		0	203.633		0.0128844	0.000749241	148.321	34.1756	21.1223
2002			12.	Ovary cancer		122.108	122.108	122.108		0	122.108		0.142871	1.81097	85.3124	21.6951	13.1469
2002			13.	Prostate cancer		206.84	206.84	206.84		206.84	0		0.119774	0.0524297	33.63	66.7044	106.334
2002			14.	Bladder cancer		66.4064	66.4064	66.4064		45.4081	20.9984		0.26245	0.220547	25.5947	17.9091	22.4196
2002			15.	Lymphomas, multiple myeloma		322.376	322.376	322.376		190.949	131.426		8.46843	29.6979	199.23	49.0062	35.9735
2002			16.	Leukaemia		440.349	440.349	440.349		246.609	193.739		47.935	97.197	247.127	26.2397	21.8504
2002		B.	Other neoplasms			164.394	164.394	164.394		83.8596	80.5343		15.6445	15.0293	92.9531	21.4224	19.3445
2002		C.	Diabetes mellitus			2099.13	2099.13	2099.13		906.796	1192.33		5.67807	11.0313	1187.02	511.042	384.352
2002		D.	Endocrine disorders			1399.42	1399.42	1399.42		665.428	733.992		440.188	140.823	659.865	80.6602	77.8842
2002		E.	Neuropsychiatric conditions			22071.3	22071.3	22071.3		11106.8	10964.6		2088.42	1947.21	16913	574.574	548.099
2002			1.	Unipolar depressive disorders		6833.11	6833.11	6833.11		2506.25	4326.86		0.00385295	606.65	5953.34	224.928	48.186
2002			2.	Bipolar disorder		1250.39	1250.39	1250.39		610.309	640.083		0.000861403	65.0844	1184.57	0.66572	0.0664642
2002			3.	Schizophrenia		1490.44	1490.44	1490.44		727.209	763.236		0.00696711	124.236	1360.96	3.18372	2.06074
2002			4.	Epilepsy		894.32	894.32	894.32		467.602	426.718		57.9353	214.459	593.518	19.0434	9.36456
2002			5.	Alcohol use disorders		3857.29	3857.29	3857.29		3135.16	722.133		0.779893	53.708	3726.4	63.1342	13.2696
2002			6.	Alzheimer and other dementias		752.264	752.264	752.264		305.133	447.131		47.43	23.052	97.0129	168.655	416.114
2002			7.	Parkinson disease		62.4539	62.4539	62.4539		32.3963	30.0576		0.177439	0.0660888	29.6447	14.5301	18.0356
2002			8.	Multiple sclerosis		121.875	121.875	121.875		51.813	70.0624		0	12.9681	106.367	1.48078	1.05982
2002			9.	Drug use disorders		1062.12	1062.12	1062.12		794.028	268.09		0	19.3158	1041.08	1.57287	0.150488
2002			10.	Post-traumatic stress disorder		243.411	243.411	243.411		80.2641	163.147		0.000172116	3.81759	237.762	1.18666	0.644414
2002			11.	Obsessive-compulsive disorder		652.816	652.816	652.816		307.843	344.972		0	8.36384	629.443	11.1602	3.84855
2002			12.	Panic disorder		602.24	602.24	602.24		198.495	403.745		0	15.8237	584.016	1.46677	0.933794
2002			13.	Insomnia (primary)		379.573	379.573	379.573		167.628	211.945		0	8.8782	334.522	29.4738	6.69883
2002			14.	Migraine		912.443	912.443	912.443		249.156	663.287		31.4125	398.677	482.315	0.0311028	0.00831454
2002		F.	Sense organ diseases			4233.41	4233.41	4233.41		2015.18	2218.23		9.55275	34.454	2515.52	1006.77	667.106
2002			1.	Glaucoma		233.914	233.914	233.914		102.046	131.868		1.25528	3.29449	131.31	50.7689	47.2853
2002			2.	Cataracts		1425.89	1425.89	1425.89		619.681	806.211		5.62327	22.0356	846.735	331.646	219.853
2002			3.	Vision disorders, age-related		1255.78	1255.78	1255.78		568.304	687.478		2.02463	8.35446	720.429	295.93	229.044
2002			4.	Hearing loss, adult onset		1314.57	1314.57	1314.57		723.529	591.046		0	0	815.502	328.287	170.785
2002		G.	Cardiovascular diseases			8591.6	8591.6	8591.6		4679.9	3911.71		132.393	116.948	4383.94	1845.22	2113.1
2002			1.	Rheumatic heart disease		120.785	120.785	120.785		45.7679	75.017		0.918906	8.88763	91.624	11.9126	7.44175
2002			2.	Hypertensive heart disease		723.917	723.917	723.917		346.751	377.166		2.18643	3.32897	334.373	166.54	217.489
2002			3.	Ischaemic heart disease		3051.68	3051.68	3051.68		1867.06	1184.62		2.59118	29.3361	1494.49	763.839	761.419
2002			4.	Cerebrovascular disease		2889.73	2889.73	2889.73		1456.64	1433.09		20.6739	23.8795	1516.49	644.532	684.149
2002			5.	Inflammatory heart diseases		469.95	469.95	469.95		281.705	188.246		26.484	12.4475	293.125	73.7656	64.1283
2002		H.	Respiratory diseases			4780.69	4780.69	4780.69		2523.16	2257.53		637.731	725.861	2431.04	472.556	513.501
2002			1.	Chronic obstructive pulmonary disease		1646.83	1646.83	1646.83		827.345	819.484		54.6556	9.54506	987.307	294.187	301.134
2002			2.	Asthma		1867.56	1867.56	1867.56		986.982	880.579		334.955	646.639	834.967	28.0492	22.9511
2002		I.	Digestive diseases			3998.86	3998.86	3998.86		2400.02	1598.84		241.717	157.365	2712.26	496.491	391.025
2002			1.	Peptic ulcer disease		178.137	178.137	178.137		113.063	65.0745		1.06559	3.76274	118.214	26.6023	28.4922
2002			2.	Cirrhosis of the liver		1312.46	1312.46	1312.46		1025.17	287.292		6.16174	7.14223	1046.15	172.267	80.7392
2002		J.	Genitourinary diseases			1348.94	1348.94	1348.94		742.563	606.381		83.0924	93.7144	849.345	146.637	176.154
2002			1.	Nephritis and nephrosis		649.787	649.787	649.787		341.707	308.08		50.4381	70.0028	341.235	90.5059	97.6051
2002			2.	Benign prostatic hypertrophy		243.494	243.494	243.494		243.494	0		0	0	223.648	10.0767	9.76889
2002		K.	Skin diseases			395.495	395.495	395.495		176.863	218.632		32.0855	40.0671	256.173	29.9477	37.2212
2002		L.	Musculoskeletal diseases			2569.84	2569.84	2569.84		991.344	1578.5		19.1842	168.231	1839.29	319.181	223.953
2002			1.	Rheumatoid arthritis		642.869	642.869	642.869		133.642	509.227		4.60619	77.2017	511.952	30.5816	18.5274
2002			2.	Osteoarthritis		974.672	974.672	974.672		413.573	561.1		0.051243	0.125009	586.06	230.375	158.061
2002		M.	Congenital anomalies			2666.43	2666.43	2666.43		1378.27	1288.16		2503.43	67.5011	90.57	3.06072	1.8693
2002		N.	Oral conditions			982.094	982.094	982.094		488.434	493.661		73.8403	516.186	308.038	67.1292	16.9012
2002	III.	Injuries				15358.6	15358.6	15358.6		12519	2839.6		1027.9	1718.51	12179.8	272.108	160.342
2002		A.	Unintentional injuries			8309.38	8309.38	8309.38		6232.38	2077		983.944	1438.56	5549.58	202.549	134.744
2002			1.	Road traffic accidents		2943.99	2943.99	2943.99		2222.74	721.252		151.974	359.191	2336.06	66.093	30.672
2002			2.	Poisonings		80.1467	80.1467	80.1467		50.7356	29.4111		12.5166	8.4807	55.3377	2.6306	1.18107
2002			3.	Falls		789.644	789.644	789.644		547.82	241.824		108.015	168.28	449.516	27.7601	36.073
2002			4.	Fires		169.728	169.728	169.728		104.824	64.9043		52.1429	31.0782	79.6659	3.58181	3.25917
2002			5.	Drownings		533.312	533.312	533.312		429.205	104.107		86.2474	107.786	329.446	6.99145	2.84241
2002			6.	Other unintentional injuries		3792.55	3792.55	3792.55		2877.05	915.502		573.047	763.749	2299.55	95.4916	60.7161
2002		B.	Intentional injuries			7049.24	7049.24	7049.24		6286.64	762.601		43.9556	279.943	6630.18	69.5591	25.598
2002			1.	Self-inflicted injuries		749.331	749.331	749.331		556.271	193.06		0.15014	42.8439	673.506	22.4467	10.3835
2002			2.	Violence		5989.22	5989.22	5989.22		5441.5	547.716		42.1384	230.124	5661.22	41.9363	13.8015
2002			3.	War		284.76	284.76	284.76		263.442	21.3171		1.53693	6.60467	270.183	5.10008	1.33483
2015	Population (millions)					612.569	559.396	556.673		297.508	315.062		54.4634	109.56	384.433	36.5944	27.5186
2015		All Causes				106238	100902	112241		58889.5	47348.6		12786.5	6180.91	67845	10271.5	9154.12
2015	I.	Communicable, maternal, perinatal and nutritional conditions				17669	14982.8	20170.9		9755.96	7913.08		6997.42	775.242	8993.89	411.111	491.37
2015		A.	Infectious and parasitic diseases			10025.7	8560.88	11353.7		6063.68	3962.04		1647.77	540.394	7378.77	262.614	196.171
2015			1.	Tuberculosis		482.525	421.897	648.449		294.845	187.681		14.4801	18.9142	376.949	46.1898	25.9924
2015			2.	STDs excluding HIV		415.804	358.619	458.729		114.999	300.805		32.9666	5.51703	375.831	0.740472	0.749761
2015			3.	HIV/AIDS		5532.59	4683.79	5791.64		3697.99	1834.6		85.0541	104.278	5280.49	58.0148	4.74962
2015			4.	Diarrhoeal diseases		1162.6	1170.77	1523.96		613.156	549.444		765.096	163.047	194.018	19.1897	21.249
2015			5.	Childhood-cluster diseases		165.226	129.683	200.605		80.7767	84.4497		153.389	8.42102	2.95484	0.268269	0.193026
2015				a.	Pertussis	151.07	118.348	183.224		72.0167	79.0532		144.266	6.78357	0.020456	0	0
2015				d.	Measles	0.0167273	0.0160797	0.0175956		0.00834581	0.00838147		0.00758814	0.00913914	0	0	0
2015				e.	Tetanus	7.39656	5.70035	9.22412		4.15182	3.24473		5.44027	0.264018	1.30375	0.209813	0.178699
2015			6.	Meningitis		320.928	246.848	400.646		182.86	138.069		192.383	37.0173	79.2879	7.00006	5.23963
2015			7.	Hepatitis B and C		79.7184	63.8567	97.2066		51.1906	28.5278		9.03069	3.94302	53.7645	8.33593	4.64429
2015			8.	Malaria		77.9361	60.9929	93.0661		41.4277	36.5085		23.2008	19.9162	31.9424	1.76456	1.11217
2015			9.	Tropical-cluster diseases		486.179	387.931	581.111		275.908	210.272		2.65205	9.9198	424.062	32.0303	17.5148
2015			10.	Leprosy		10.5555	9.87538	11.2216		5.77995	4.77554		0.161917	2.26718	6.68861	0.639354	0.79843
2015			11.	Dengue		34.0681	25.9206	43.6		18.1824	15.8857		6.52798	22.5534	4.21141	0.412025	0.363283
2015			12.	Japanese encephalitis		0	0	0		0	0		0	0	0	0	0
2015			13.	Trachoma		117.337	97.8603	136.097		31.389	85.948		0.238518	0.575996	78.7019	21.6256	16.195
2015			14.	Intestinal nematode infections		110.638	88.3906	128.363		56.1603	54.4778		28.5094	65.4324	14.8075	1.08558	0.803209
2015		B.	Respiratory infections			1665.64	1334.9	1972.92		921.847	743.794		724.255	139.999	455.041	116.221	230.125
2015		C.	Maternal conditions			863.566	686.221	1095.16		0	863.566		0.0222781	6.5377	856.991	0	0.0154686
2015		D.	Perinatal conditions			4149.17	3620.57	4616.33		2296.22	1852.94		4148.98	0.0972351	0.0929371	0	0.00209386
2015		E.	Nutritional deficiencies			964.946	780.265	1132.74		474.211	490.735		476.394	88.2139	303.005	32.2771	65.0568
2015			1.	Protein-energy malnutrition		489.715	388.757	578.575		264.233	225.482		338.822	21.0526	68.6826	17.0055	44.1523
2015			2.	Iodine deficiency		89.0575	72.957	98.5187		44.1801	44.8774		66.5171	22.3339	0.145495	0.0234242	0.0375938
2015			3.	Vitamin A deficiency		0.305684	0.225958	0.344804		0.115716	0.189968		0.205895	0	0.083604	0.00612049	0.010065
2015			4.	Iron-deficiency anaemia		358.123	295.849	422.077		150.259	207.864		65.1881	43.3959	220.709	12.6104	16.219
2015	II.	Noncommunicable diseases				71218.4	69138.2	73908.5		34896.2	36322.3		4944.73	3948.48	44416.1	9474.57	8434.51
2015		A.	Malignant neoplasms			6692.75	6578.86	7027.31		3072.7	3620.04		92.2996	179.597	3822.75	1474.99	1123.11
2015			1.	Mouth and oropharynx cancers		191.757	188.168	201.131		144.382	47.375		0.534086	0.942204	117.311	46.3219	26.6477
2015			2.	Oesophagus cancer		192.099	189.255	199.798		145.213	46.8857		0	0.0655025	102.475	54.6549	34.9034
2015			3.	Stomach cancer		685.562	675.362	713.93		402.609	282.953		0.578935	1.83771	365.522	173.929	143.694
2015			4.	Colon and rectum cancers		427.313	421.389	439.776		204.594	222.719		0.428619	0.660511	230.427	101.989	93.8077
2015			5.	Liver cancer		254.215	250.892	263.174		129.323	124.893		3.19001	2.49529	130.611	67.1368	50.7824
2015			6.	Pancreas cancer		216.298	213.347	223.217		108.261	108.037		0.0751684	0.345334	99.7931	64.2817	51.8024
2015			7.	Trachea, bronchus, lung cancers		732.983	706.933	884.794		457.319	275.664		7.90858e-05	0.00119082	363.037	226.241	143.704
2015			8.	Melanoma and other skin cancers		90.1017	88.4881	93.6464		50.9453	39.1564		0.0976055	0.694181	54.5565	16.8682	17.8852
2015			9.	Breast cancer		622.899	613.993	634.966		3.94557	618.953		0.146757	0.0663003	452.452	107.095	63.1385
2015			10.	Cervix uteri cancer		488.154	477.072	501.037		0	488.154		0	0.00335084	371.499	75.8303	40.821
2015			11.	Corpus uteri cancer		256.013	256.653	257.698		0	256.013		0.0136426	0.000837589	180.484	48.2465	27.2678
2015			12.	Ovary cancer		143.67	140.732	147.408		0	143.67		0.117698	1.59399	97.5456	28.4089	16.0034
2015			13.	Prostate cancer		269.657	268.622	276.779		269.657	0		0.119983	0.0565964	42.9698	87.7382	138.773
2015			14.	Bladder cancer		84.3458	83.556	86.4393		56.6937	27.6521		0.224341	0.200284	31.2581	23.4398	29.2232
2015			15.	Lymphomas, multiple myeloma		371.9	365.486	385.545		217.077	154.823		7.00822	25.7519	228.878	65.7697	44.4927
2015			16.	Leukaemia		455.009	447.311	466.935		253.345	201.664		40.6377	85.3487	265.473	35.7596	27.7903
2015		B.	Other neoplasms			183.661	180.493	189.321		92.3446	91.316		12.9635	12.7263	104.069	28.5721	25.3299
2015		C.	Diabetes mellitus			4918.23	4526.81	5205.43		1696.99	3221.24		4.55118	8.6193	3036.35	1064.75	803.966
2015		D.	Endocrine disorders			1274.93	1180.99	1360.62		602.994	671.937		279.773	101.444	681.431	106.274	106.009
2015		E.	Neuropsychiatric conditions			24404.4	24336.2	24460.3		12038.1	12366.3		1632.91	1915.15	19207.5	851.596	797.312
2015			1.	Unipolar depressive disorders		8097.29	8110.44	8081.99		2889.91	5207.38		0.00246612	609.54	7075.62	343.348	68.7859
2015			2.	Bipolar disorder		1313.4	1302.56	1324.07		635.738	677.659		0.000551465	64.0213	1248.31	0.97298	0.0908673
2015			3.	Schizophrenia		1586.12	1576	1596.07		758.344	827.773		0.0044523	122.638	1456.03	4.60423	2.837
2015			4.	Epilepsy		940.101	913.247	965.323		487.439	452.662		49.8245	201.795	648.928	26.9585	12.5955
2015			5.	Alcohol use disorders		4328	4320.62	4331.89		3503.24	824.763		0.636538	53.4766	4168.67	87.9573	17.2619
2015			6.	Alzheimer and other dementias		1061.32	1066.86	1054.54		411.512	649.807		45.7092	22.7701	124.147	253.045	615.648
2015			7.	Parkinson disease		79.2864	77.354	81.3526		41.1698	38.1167		0.120723	0.0463972	36.0003	19.044	24.075
2015			8.	Multiple sclerosis		136.555	136.095	137.032		57.4209	79.134		0	13.0284	120.223	1.8878	1.41602
2015			9.	Drug use disorders		1173.51	1172.46	1174.5		872.182	301.327		0	19.4709	1151.55	2.29322	0.19919
2015			10.	Post-traumatic stress disorder		283.982	284.345	283.576		91.1839	192.798		0.000110081	3.80675	277.402	1.8414	0.93103
2015			11.	Obsessive-compulsive disorder		747.495	746.787	748.051		347.897	399.598		0	8.34386	717.133	16.6004	5.41721
2015			12.	Panic disorder		639.255	636.901	641.539		208.36	430.894		0	15.7286	619.995	2.22294	1.30755
2015			13.	Insomnia (primary)		466.765	467.758	465.556		201.004	265.761		0	8.90594	403.487	44.8155	9.55608
2015			14.	Migraine		961.82	956.258	967.239		255.197	706.623		30.5011	396.836	534.425	0.0462142	0.0111735
2015		F.	Sense organ diseases			5740.72	5898.42	5874.96		2589.55	3151.17		8.0153	29.1476	3293.81	1479.99	929.749
2015			1.	Glaucoma		323.491	324.784	321.862		134.188	189.303		1.23869	3.32801	173.408	77.6747	67.8419
2015			2.	Cataracts		1889.71	2017.87	1999.83		764.856	1124.85		4.466	17.3245	1089.38	472.317	306.223
2015			3.	Vision disorders, age-related		1727.92	1763.42	1747.57		733.59	994.325		1.87705	7.92598	949.156	445.362	323.594
2015			4.	Hearing loss, adult onset		1796.64	1789.6	1802.56		955.333	841.305		0	0	1080.28	484.46	231.898
2015		G.	Cardiovascular diseases			10054.2	9572.51	10454.7		5443.17	4611.05		118.83	81.3946	4661.73	2376.99	2815.28
2015			1.	Rheumatic heart disease		113.273	102.925	125.565		44.7245	68.5483		0.816766	5.17608	82.5591	14.7508	9.97003
2015			2.	Hypertensive heart disease		841.075	793.348	909.691		415.189	425.886		1.99878	2.35136	342.634	197.282	296.81
2015			3.	Ischaemic heart disease		3889.3	3767.55	4024.99		2314.03	1575.27		2.47307	24.6319	1723.7	1080.18	1058.31
2015			4.	Cerebrovascular disease		3237.1	3038.58	3265.58		1616.85	1620.25		18.8485	16.3877	1567.5	776.216	858.148
2015			5.	Inflammatory heart diseases		489.359	459.589	534.744		294.676	194.683		22.7877	7.43307	286.763	88.1109	84.2644
2015		H.	Respiratory diseases			5470.93	5109.01	6179.94		2902.26	2568.67		560.857	706.913	2832.69	658.291	712.177
2015			1.	Chronic obstructive pulmonary disease		2153.59	1931.15	2701.1		1106.58	1047.01		46.5568	8.15612	1250.36	422.652	425.865
2015			2.	Asthma		1951.66	1939.04	1965.01		1032.05	919.606		320.996	644.618	913.86	40.1758	32.0092
2015		I.	Digestive diseases			4164.66	3678.58	4623.26		2564.35	1600.31		134.876	86.3697	2839.11	613.851	490.453
2015			1.	Peptic ulcer disease		196.17	176.007	213.642		126.284	69.8857		0.670442	2.18993	122.848	33.7128	36.7486
2015			2.	Cirrhosis of the liver		1485.68	1295.84	1663.49		1175.56	310.113		4.25607	4.11657	1168.61	209.886	98.8066
2015		J.	Genitourinary diseases			1460.41	1380.29	1536		881.043	579.364		50.2242	56.4747	922.26	193.214	238.234
2015			1.	Nephritis and nephrosis		670.909	623.734	714.827		372.065	298.844		30.4316	41.5608	348.822	118.794	131.3
2015			2.	Benign prostatic hypertrophy		339.501	340.853	337.44		339.501	0		0	0	311.776	14.2307	13.495
2015		K.	Skin diseases			470.722	468.551	472.667		205.301	265.421		29.1077	39.0817	306.347	43.4829	52.7026
2015		L.	Musculoskeletal diseases			3233.94	3209.88	3257.13		1208	2025.95		17.4892	165.293	2260.2	477.145	313.817
2015			1.	Rheumatoid arthritis		760.708	756.252	765.085		157.514	603.194		4.45388	76.3902	608.138	45.5899	26.1361
2015			2.	Osteoarthritis		1345.58	1340.66	1350.2		540.984	804.597		0.0309626	0.122888	779.945	345.831	219.651
2015		M.	Congenital anomalies			2073.23	1940.1	2193.37		1073.18	1000.05		1930.7	48.4142	87.5221	4.0312	2.56389
2015		N.	Oral conditions			1075.59	1077.47	1073.4		526.178	549.407		72.127	517.852	360.408	101.391	23.8073
2015	III.	Injuries				17350.6	16781.1	18161.8		14237.4	3113.23		844.357	1457.19	14435	385.852	228.236
2015		A.	Unintentional injuries			8456.4	8210.58	9020.68		6260.47	2195.93		797.069	1139.93	6044.1	282.135	193.173
2015			1.	Road traffic accidents		3443.54	3279.54	3437.1		2559.22	884.32		140.255	331.481	2835.54	94.1627	42.1051
2015			2.	Poisonings		78.4079	74.1407	86.726		49.855	28.5528		9.43499	6.64789	57.1264	3.56062	1.63802
2015			3.	Falls		789.804	776.424	848.916		539.457	250.347		89.994	137.297	468.794	40.12	53.5992
2015			4.	Fires		161.276	156.045	174.599		98.8487	62.4269		42.6937	26.1512	82.9314	4.90467	4.5947
2015			5.	Drownings		457.682	415.693	505.375		370.205	87.4766		66.8457	74.1147	303.567	9.22047	3.93352
2015			6.	Other unintentional injuries		3525.69	3508.74	3967.97		2642.89	882.807		447.846	564.238	2296.14	130.166	87.3027
2015		B.	Intentional injuries			8894.2	8570.48	9141.14		7976.9	917.302		47.288	317.258	8390.88	103.717	35.0626
2015			1.	Self-inflicted injuries		963.394	946.348	979.766		733.434	229.96		0.163283	45.5426	871.987	32.0924	13.6084
2015			2.	Violence		7585.53	7322.01	7816.52		6925.49	660.037		45.4556	264.56	7193.6	62.5121	19.4077
2015			3.	War		314.066	272.533	312.371		287.357	26.7096		1.53532	6.70602	294.879	9.00735	1.93856
2030	Population (millions)					677.61	634.773	619.264		320.45	357.16		50.6418	104.12	421.222	55.6104	46.0164
2030		All Causes				110454	100589	121479		60325.4	50129		7521.18	5120.36	70334.6	13548.9	13929.3
2030	I.	Communicable, maternal, perinatal and nutritional conditions				13447.1	8788.24	16337.5		7603.83	5843.27		3347.41	481.792	8698.23	406.65	513.018
2030		A.	Infectious and parasitic diseases			9411.98	5948.39	10852.1		5598.76	3813.22		719.077	366.45	7839.6	282.959	203.894
2030			1.	Tuberculosis		192.139	121.984	368.604		114.808	77.3308		4.48502	6.31592	143.737	23.1466	14.4547
2030			2.	STDs excluding HIV		275.537	201.483	335.813		80.2218	195.315		18.1102	3.329	252.649	0.627233	0.821457
2030			3.	HIV/AIDS		7051.89	3985.52	7146.59		4372.42	2679.47		92.5597	141.074	6670.12	136.601	11.5274
2030			4.	Diarrhoeal diseases		586.262	805.759	1096.67		313.195	273.067		302.986	98.8668	140.615	18.3795	25.4153
2030			5.	Childhood-cluster diseases		77.9133	52.1528	113.853		34.9183	42.995		69.0404	7.27979	1.17699	0.201634	0.214492
2030				a.	Pertussis	71.7496	48.5408	104.002		30.832	40.9176		65.0559	6.68484	0.00889935	0	0
2030				d.	Measles	0.0146271	0.0142502	0.0152577		0.00730639	0.00732068		0.00629229	0.00833479	0	0	0
2030				e.	Tetanus	3.40531	1.94311	5.4665		2.04669	1.35862		2.17888	0.10735	0.747428	0.166602	0.205044
2030			6.	Meningitis		143.326	80.9734	231.386		83.9963	59.3295		74.4886	15.1186	43.2204	5.13883	5.35935
2030			7.	Hepatitis B and C		45.9967	29.5606	68.0281		28.4105	17.5861		3.94148	1.69957	28.7001	6.41402	5.24143
2030			8.	Malaria		42.6481	28.4232	60.5076		22.7333	19.9148		8.91662	11.2327	19.7766	1.47643	1.2458
2030			9.	Tropical-cluster diseases		270.676	173.371	390.141		160.787	109.889		0.869046	3.57859	223.821	23.6599	18.7472
2030			10.	Leprosy		5.52545	4.83684	6.27646		3.04302	2.48243		0.0692138	0.983815	3.16551	0.45634	0.85057
2030			11.	Dengue		15.2885	8.37366	25.9422		8.77956	6.5089		2.75005	9.23161	2.60952	0.32947	0.367815
2030			12.	Japanese encephalitis		0	0	0		0	0		0	0	0	0	0
2030			13.	Trachoma		79.7402	56.7415	105.443		21.792	57.9482		0.0819045	0.209717	44.0845	17.2071	18.157
2030			14.	Intestinal nematode infections		56.2231	36.5945	78.7256		29.5027	26.7204		12.1883	32.9237	9.27229	0.955917	0.882956
2030		B.	Respiratory infections			968.972	661.72	1325.13		536.16	432.812		255.337	65.8917	304.186	99.872	243.685
2030		C.	Maternal conditions			372.176	263.286	634.244		0	372.176		0.00729709	5.87657	366.274	0	0.0173516
2030		D.	Perinatal conditions			2155.41	1555.94	2776.95		1202.26	953.153		2155.32	0.0403638	0.0439904	0	0.00222173
2030		E.	Nutritional deficiencies			538.558	358.9	749.075		266.65	271.907		217.665	43.5334	188.121	23.8187	65.4203
2030			1.	Protein-energy malnutrition		253.929	166.008	355.768		137.149	116.78		146.939	9.65617	41.2056	11.6359	44.4928
2030			2.	Iodine deficiency		48.8574	33.385	62.6622		24.6393	24.2181		36.959	11.7563	0.0831087	0.0186585	0.0403363
2030			3.	Vitamin A deficiency		0.122252	0.0710262	0.175972		0.0400435	0.0822086		0.0591069	0	0.0508276	0.00348352	0.00883402
2030			4.	Iron-deficiency anaemia		218.513	147.868	306.547		95.5864	122.926		31.6361	21.4836	138.998	10.1904	16.2045
2030	II.	Noncommunicable diseases				78896	75212.4	85062.9		37820.9	41075.1		3578.54	3517.38	46146.7	12610	13043.4
2030		A.	Malignant neoplasms			8091.95	7876.67	8828.72		3763.17	4328.78		68.1507	142.379	4108.43	2045.76	1727.22
2030			1.	Mouth and oropharynx cancers		227.941	222.737	243.261		168.751	59.1894		0.39505	0.740325	124.152	61.8523	40.8009
2030			2.	Oesophagus cancer		234.412	231.614	245.791		175.159	59.2524		0	0.0529159	110.84	71.5054	52.0136
2030			3.	Stomach cancer		866.843	855.256	907.333		508.129	358.714		0.449933	1.55576	399.727	239.406	225.705
2030			4.	Colon and rectum cancers		509.964	502.015	527.892		245.36	264.604		0.385066	0.510715	243.749	130.968	134.351
2030			5.	Liver cancer		318.84	314.577	332.488		161.274	157.567		2.28036	1.99953	144.72	91.7552	78.085
2030			6.	Pancreas cancer		267.951	264.523	277.645		134.992	132.959		0.0472754	0.273476	106.61	84.0147	77.0055
2030			7.	Trachea, bronchus, lung cancers		1105.58	1047.3	1553.85		665.376	440.205		7.90858e-05	0.00119082	498.829	364.535	242.215
2030			8.	Melanoma and other skin cancers		104.197	101.742	109.533		59.7402	44.4565		0.0826979	0.527916	54.6147	21.7924	27.179
2030			9.	Breast cancer		707.426	684.67	731.291		4.63778	702.788		0.111579	0.0526232	471.319	141.072	94.8703
2030			10.	Cervix uteri cancer		558.28	529.25	584.391		0	558.28		0	0.00374766	385.297	107.692	65.2868
2030			11.	Corpus uteri cancer		300.533	295.632	305.236		0	300.533		0.0123435	0.00100913	191.687	66.4231	42.4094
2030			12.	Ovary cancer		157.462	149.708	165.191		0	157.462		0.0829475	1.25149	96.5243	35.973	23.6302
2030			13.	Prostate cancer		371.132	378.841	373.229		371.132	0		0.105079	0.0514368	49.8429	118.186	202.947
2030			14.	Bladder cancer		109.485	109.563	111.23		72.5971	36.8882		0.172564	0.179476	34.4485	31.2329	43.4518
2030			15.	Lymphomas, multiple myeloma		415.608	404.123	438.05		239.679	175.929		4.95616	20.2785	236.619	88.7191	65.035
2030			16.	Leukaemia		444.497	426.666	466.934		246.468	198.029		29.9508	67.6014	257.187	48.6645	41.0939
2030		B.	Other neoplasms			199.379	193.655	208.668		99.9326	99.4463		9.22391	9.63357	104.445	38.1612	37.9154
2030		C.	Diabetes mellitus			5963.92	5019.74	6681.15		2055.6	3908.32		3.32585	6.23846	3224.23	1436.43	1293.7
2030		D.	Endocrine disorders			1151.75	1005.83	1296.46		539.368	612.378		157.136	66.0891	631.83	134.847	161.843
2030		E.	Neuropsychiatric conditions			25692.2	25733.1	25675.8		12343.7	13348.6		1186.66	1780.72	20144.9	1266.24	1313.75
2030			1.	Unipolar depressive disorders		8927.67	9010.05	8855.89		3090.13	5837.53		0.00141693	579.37	7706.42	524.609	117.264
2030			2.	Bipolar disorder		1285.59	1270.69	1304.88		617.928	667.657		0.000316954	59.2178	1224.81	1.41948	0.136523
2030			3.	Schizophrenia		1574.19	1561.39	1591.48		740.811	833.377		0.00255143	114.202	1448.64	6.67025	4.67745
2030			4.	Epilepsy		915.312	869.713	964.182		468.57	446.742		40.388	177.078	640.337	37.7392	19.7698
2030			5.	Alcohol use disorders		4527.26	4544.06	4516.99		3647.04	880.22		0.457489	50.3717	4327.45	122.815	26.1622
2030			6.	Alzheimer and other dementias		1611.07	1654.94	1555.07		574.698	1036.37		41.9237	21.3578	144.898	381.834	1021.06
2030			7.	Parkinson disease		99.3207	94.7	103.399		51.5117	47.809		0.0762755	0.0273497	38.9653	24.1069	36.145
2030			8.	Multiple sclerosis		141.328	140.899	142		58.7282	82.5994		0	12.4042	124.42	2.32064	2.18295
2030			9.	Drug use disorders		1203.65	1210.52	1201.45		888.572	315.075		0	18.6995	1181.35	3.28691	0.312296
2030			10.	Post-traumatic stress disorder		305.364	307.671	303.581		95.6683	209.696		6.3168e-05	3.59695	297.295	2.8655	1.60635
2030			11.	Obsessive-compulsive disorder		797.689	801.28	795.758		364.899	432.79		0	7.87295	755.816	24.8239	9.1762
2030			12.	Panic disorder		639.45	637.386	642.782		206.526	432.924		0	14.7448	619.111	3.37597	2.21864
2030			13.	Insomnia (primary)		537.659	544.111	531.666		223.821	313.838		0	8.46546	444.458	68.5291	16.2062
2030			14.	Migraine		941.672	933.805	951.343		246.864	694.809		27.8836	371.919	541.783	0.0687162	0.0183832
2030		F.	Sense organ diseases			7313.9	8108.76	7855.5		3135.23	4178.67		6.30921	23.2443	3697.35	2086.5	1500.5
2030			1.	Glaucoma		441.652	450.422	431.601		169.128	272.524		1.16118	3.18936	203.369	118.656	115.276
2030			2.	Cataracts		2221.23	2818.77	2707		868.175	1353.06		3.25304	12.6007	1133.18	601.017	471.176
2030			3.	Vision disorders, age-related		2291.13	2470.32	2370.04		893.284	1397.84		1.63866	7.08558	1092.54	651.225	538.633
2030			4.	Hearing loss, adult onset		2357.21	2366.92	2343.88		1203.13	1154.09		0	0	1266.73	715.351	375.131
2030		G.	Cardiovascular diseases			11316.9	10138.1	12246.7		5972.72	5344.15		96.7387	52.2206	4278.18	2758.62	4131.11
2030			1.	Rheumatic heart disease		98.3734	81.3788	120.641		40.3126	58.0608		0.657972	2.75042	62.8736	16.8574	15.234
2030			2.	Hypertensive heart disease		959.852	868.286	1092.73		471.66	488.192		1.64895	1.48491	295.459	213.5	447.76
2030			3.	Ischaemic heart disease		4471.06	4101.02	4840.3		2559.29	1911.77		2.13995	19.0197	1640.49	1277.31	1532.09
2030			4.	Cerebrovascular disease		3691.77	3194.9	3807.11		1827.16	1864.61		15.6028	10.3471	1469.73	908.831	1287.26
2030			5.	Inflammatory heart diseases		480.148	422.803	565.296		283.68	196.468		17.9329	3.96353	238.157	96.6189	123.475
2030		H.	Respiratory diseases			6224.35	5416.45	8064.82		3338.88	2885.47		466.235	651.898	3053.04	916.069	1137.1
2030			1.	Chronic obstructive pulmonary disease		2800.65	2260.29	4293.79		1498.12	1302.53		34.0445	5.9389	1445.65	606.645	708.368
2030			2.	Asthma		1942.71	1924.44	1969.63		1024.08	918.626		292.169	607.153	934.561	57.3473	51.477
2030		I.	Digestive diseases			4238.5	3325.79	5191.99		2608.46	1630.04		62.9435	40.4709	2663.19	742.683	729.207
2030			1.	Peptic ulcer disease		213.618	175.08	250.249		135.647	77.9708		0.352445	1.10546	114.577	41.9732	55.6097
2030			2.	Cirrhosis of the liver		1544.47	1164.14	1952.51		1221.25	323.222		2.53006	1.98136	1143.93	250.598	145.431
2030		J.	Genitourinary diseases			1595.82	1477.52	1717.57		1020.14	575.682		27.2928	30.8737	928.785	248.959	359.912
2030			1.	Nephritis and nephrosis		712.539	637.439	788.644		406.795	305.743		16.3912	21.9271	324.045	153.344	196.832
2030			2.	Benign prostatic hypertrophy		431.002	441.463	419.892		431.002	0		0	0	390.486	20.1589	20.3567
2030		K.	Skin diseases			546.514	546.967	545.542		229.907	316.607		25.3271	36.3295	336.135	63.7058	85.0166
2030		L.	Musculoskeletal diseases			3912.84	3895.96	3932.63		1385.88	2526.96		15.2792	153.698	2509.76	712.581	521.52
2030			1.	Rheumatoid arthritis		845.351	839.887	852.059		173.431	671.92		4.06238	71.1881	659.025	67.8741	43.2018
2030			2.	Osteoarthritis		1805.85	1812.03	1798.6		673.632	1132.22		0.0170263	0.114131	921.74	518.597	365.384
2030		M.	Congenital anomalies			1502.85	1317.97	1683.57		781.581	721.269		1387	31.463	75.2127	5.15147	4.02285
2030		N.	Oral conditions			1145.12	1155.84	1133.87		546.356	598.768		66.9181	492.122	391.226	154.329	40.5293
2030	III.	Injuries				18111.3	16588.2	20079.1		14900.7	3210.68		595.23	1121.19	15489.7	532.259	372.945
2030		A.	Unintentional injuries			7822.88	7167.25	9121.95		5606.04	2216.84		550.134	804.77	5772.97	379.212	315.796
2030			1.	Road traffic accidents		3614.67	3143.67	3716.04		2600.15	1014.52		114.773	277.75	3030.34	126.294	65.5147
2030			2.	Poisonings		67.3087	58.7267	85.493		41.8531	25.4556		5.80272	4.64172	49.4512	4.73511	2.67797
2030			3.	Falls		738.92	705.053	864.423		479.743	259.177		64.6808	100.883	426.178	56.7908	90.3885
2030			4.	Fires		138.113	126.806	166.534		82.198	55.9147		29.6438	19.9162	74.4759	6.67968	7.39717
2030			5.	Drownings		340.285	266.616	432.245		274.286	65.9988		43.3665	43.0963	235.861	11.539	6.42148
2030			6.	Other unintentional injuries		2923.59	2866.38	3857.22		2127.82	795.772		291.867	358.484	1956.67	173.174	143.396
2030		B.	Intentional injuries			10288.4	9420.99	10957.1		9294.61	993.837		45.0959	316.418	9716.74	153.047	57.1492
2030			1.	Self-inflicted injuries		1095.48	1061.13	1133.62		845.24	250.243		0.161844	45.4459	982.94	46.2409	20.695
2030			2.	Violence		8841.53	8100.09	9474.96		8129.76	711.766		43.2891	263.766	8409.25	92.644	32.5797
2030			3.	War		315.946	226.937	310.277		284.829	31.1163		1.51801	6.72882	289.999	14.0062	3.69383

## Sheet: Middle East and North Africa
DALYs by cause, scenario, sex and age for the years 2002, 2015 and 2030
Source: Mathers CD, Loncar D (2006). Projections of global mortality and burden of disease from 2002 to 2030.
Middle East and North Africa
						Total DALYs ('000)				Baseline DALYs ('000)			Baseline projections ('000) by age group
Year		Cause				Baseline	Optimistic	Pessimistic		Male	Female		0-4	5-14	15-59	60-69	70+
2002	Population (millions)					312.593	312.593	312.593		158.58	154.013		37.282	74.1237	182.563	11.1487	7.47568
2002		All Causes				63131.2	63131.2	63131.2		33259.6	29871.6		19110	6001.93	30594.8	4147.72	3276.74
2002	I.	Communicable, maternal, perinatal and nutritional conditions				18754.8	18754.8	18754.8		8893.22	9861.54		13185.1	1355.71	3769.1	236	208.854
2002		A.	Infectious and parasitic diseases			7034.36	7034.36	7034.36		3482.63	3551.73		4647.42	502.895	1589.97	167.298	126.782
2002			1.	Tuberculosis		498.408	498.408	498.408		260.647	237.761		80.8001	32.2485	334.616	32.9269	17.816
2002			2.	STDs excluding HIV		415.448	415.448	415.448		102.941	312.507		24.1801	7.36086	370.353	9.96152	3.59236
2002			3.	HIV/AIDS		66.8277	66.8277	66.8277		51.0835	15.7443		8.31002	1.18898	57.0677	0.253804	0.00720943
2002			4.	Diarrhoeal diseases		2686.15	2686.15	2686.15		1401.15	1285		2443.18	94.4258	120.995	12.8843	14.6654
2002			5.	Childhood-cluster diseases		564.701	564.701	564.701		281.851	282.85		509.009	45.3701	10.0587	0.153798	0.109739
2002				a.	Pertussis	241.481	241.481	241.481		120.531	120.95		236.663	4.81802	0	0	0
2002				d.	Measles	215.859	215.859	215.859		107.681	108.178		179.059	36.2557	0.544373	0	0
2002				e.	Tetanus	98.5401	98.5401	98.5401		49.1515	49.3886		92.174	2.80392	3.39867	0.112118	0.0514719
2002			6.	Meningitis		356.037	356.037	356.037		159.446	196.592		290.095	31.7412	30.4633	2.14029	1.5973
2002			7.	Hepatitis B and C		145.084	145.084	145.084		83.5281	61.556		37.0206	13.4048	65.2388	17.7797	11.6403
2002			8.	Malaria		339.439	339.439	339.439		164.247	175.192		227.01	48.4129	60.1595	2.41256	1.44387
2002			9.	Tropical-cluster diseases		280.582	280.582	280.582		176.622	103.96		10.3729	62.991	167.769	21.4815	17.9677
2002			10.	Leprosy		2.01253	2.01253	2.01253		1.02172	0.990809		0.0706905	0.446122	1.02042	0.206058	0.26924
2002			11.	Dengue		9.48335	9.48335	9.48335		5.61689	3.86646		1.79952	6.76965	0.796565	0.0657683	0.0518496
2002			12.	Japanese encephalitis		0	0	0		0	0		0	0	0	0	0
2002			13.	Trachoma		243.242	243.242	243.242		66.9396	176.302		0.523211	1.89105	176.706	38.2599	25.8616
2002			14.	Intestinal nematode infections		95.7321	95.7321	95.7321		48.7314	47.0007		11.276	71.1201	12.5222	0.577024	0.236751
2002		B.	Respiratory infections			3552.12	3552.12	3552.12		1821.45	1730.67		2780.85	396.036	255.764	52.0295	67.4416
2002		C.	Maternal conditions			1625.19	1625.19	1625.19		0	1625.19		0	12.9037	1612.29	0	0
2002		D.	Perinatal conditions			4393.78	4393.78	4393.78		2560.23	1833.55		4393.78	0	0	0	0
2002		E.	Nutritional deficiencies			2149.31	2149.31	2149.31		1028.92	1120.39		1363.05	443.873	311.082	16.6723	14.631
			1.	Protein-energy malnutrition		762.867	762.867	762.867		383.898	378.969		743.436	11.4078	4.50644	1.71548	1.80187
			2.	Iodine deficiency		621.726	621.726	621.726		312.511	309.215		457.573	163.168	0.470601	0.221504	0.293376
			3.	Vitamin A deficiency		3.61158	3.61158	3.61158		1.98915	1.62243		0.96897	0.424321	1.40121	0.365922	0.451153
			4.	Iron-deficiency anaemia		709.437	709.437	709.437		303.086	406.352		115.899	264.986	303.122	13.8245	11.6056
2002	II.	Noncommunicable diseases				34505.5	34505.5	34505.5		17693.6	16811.9		4641.15	2425.4	20767	3715.68	2956.3
2002		A.	Malignant neoplasms			2279.08	2279.08	2279.08		1195.69	1083.39		99.8465	151.549	1435.34	354.881	237.469
2002			1.	Mouth and oropharynx cancers		64.9269	64.9269	64.9269		45.2144	19.7125		1.07599	1.62639	45.6315	10.7124	5.88064
2002			2.	Oesophagus cancer		52.7849	52.7849	52.7849		30.1134	22.6716		0.288204	0.509836	30.0322	12.828	9.12667
2002			3.	Stomach cancer		188.979	188.979	188.979		109.323	79.6559		0.818155	3.20004	111.675	41.3987	31.8864
2002			4.	Colon and rectum cancers		132.258	132.258	132.258		73.6283	58.6293		0.206263	2.2222	93.1875	21.475	15.1667
2002			5.	Liver cancer		105.688	105.688	105.688		62.4704	43.2175		2.26064	2.5975	64.2608	22.6081	13.9608
2002			6.	Pancreas cancer		40.1334	40.1334	40.1334		23.433	16.7004		0.0327233	0.172651	23.3641	9.80148	6.76248
2002			7.	Trachea, bronchus, lung cancers		210.934	210.934	210.934		155.455	55.4795		0.881764	2.2321	123.139	52.5713	32.11
2002			8.	Melanoma and other skin cancers		15.0461	15.0461	15.0461		7.37942	7.66672		0.245858	0.319249	10.0422	2.44337	1.99546
2002			9.	Breast cancer		225.974	225.974	225.974		0.056841	225.917		0.0396922	0.412663	187.83	25.3511	12.3403
2002			10.	Cervix uteri cancer		76.8795	76.8795	76.8795		0	76.8795		0.137656	0.598644	59.2975	11.7825	5.06312
2002			11.	Corpus uteri cancer		18.2536	18.2536	18.2536		0	18.2536		0.000411915	0.213167	13.6862	2.35114	2.00263
2002			12.	Ovary cancer		35.9807	35.9807	35.9807		0	35.9807		0.0868535	1.16035	28.3374	4.02856	2.36757
2002			13.	Prostate cancer		42.1595	42.1595	42.1595		42.1595	0		0.10738	0.278058	12.3809	12.9882	16.405
2002			14.	Bladder cancer		160.899	160.899	160.899		130.605	30.2938		0.325744	0.49165	93.5799	39.6726	26.829
2002			15.	Lymphomas, multiple myeloma		221.472	221.472	221.472		135.026	86.4457		12.2192	38.2525	140.754	18.8721	11.3735
2002			16.	Leukaemia		312.535	312.535	312.535		177.006	135.529		38.6515	62.1939	187.084	15.018	9.58803
2002		B.	Other neoplasms			274.993	274.993	274.993		148.843	126.15		11.8429	20.6313	178.741	38.1748	25.6031
2002		C.	Diabetes mellitus			739.193	739.193	739.193		330.815	408.378		5.53924	11.8794	520.574	119.113	82.0871
2002		D.	Endocrine disorders			565.089	565.089	565.089		281.853	283.236		187.933	57.8749	234.905	47.7339	36.6425
2002		E.	Neuropsychiatric conditions			9060.42	9060.42	9060.42		4510.91	4549.51		1049.35	1023.44	6648.33	191.393	147.905
2002			1.	Unipolar depressive disorders		2651.36	2651.36	2651.36		1082.66	1568.7		0.375985	280.165	2276.99	78.5338	15.2938
2002			2.	Bipolar disorder		811.429	811.429	811.429		411.703	399.726		0.0839107	45.2108	765.871	0.24657	0.0168014
2002			3.	Schizophrenia		985.986	985.986	985.986		505.784	480.203		0	64.3836	919.515	1.63893	0.449283
2002			4.	Epilepsy		291.175	291.175	291.175		157.068	134.107		26.8773	67.9694	188.287	5.13162	2.9101
2002			5.	Alcohol use disorders		79.7251	79.7251	79.7251		74.8633	4.86185		0	0.311816	77.1474	1.46375	0.802186
2002			6.	Alzheimer and other dementias		208.395	208.395	208.395		96.0336	112.361		23.9117	12.0686	38.0847	45.7013	88.6286
2002			7.	Parkinson disease		71.6718	71.6718	71.6718		39.2373	32.4346		6.85617	6.38477	42.2004	9.23704	6.9935
2002			8.	Multiple sclerosis		71.0645	71.0645	71.0645		31.2602	39.8044		0	8.59625	60.6287	1.1742	0.665385
2002			9.	Drug use disorders		944.408	944.408	944.408		783.08	161.328		0	13.6917	925.248	4.46579	1.0022
2002			10.	Post-traumatic stress disorder		178.082	178.082	178.082		48.6617	129.421		0.0169059	2.23647	175.188	0.448355	0.192378
2002			11.	Obsessive-compulsive disorder		409.705	409.705	409.705		180.812	228.893		0	112.242	293.476	3.55449	0.432435
2002			12.	Panic disorder		396.056	396.056	396.056		134.836	261.22		0	12.3988	382.665	0.625051	0.366797
2002			13.	Insomnia (primary)		86.1212	86.1212	86.1212		31.7494	54.3718		0	4.24687	72.978	6.96177	1.93457
2002			14.	Migraine		288.232	288.232	288.232		87.5	200.732		17.2308	205.411	65.5693	0.0174389	0.0036173
2002		F.	Sense organ diseases			5071.76	5071.76	5071.76		2350.2	2721.55		27.9947	149.558	3958.17	668.406	267.623
2002			1.	Glaucoma		678.951	678.951	678.951		284.263	394.688		4.60426	37.8898	532.738	72.1202	31.5993
2002			2.	Cataracts		1488.73	1488.73	1488.73		674.443	814.29		12.7095	83.6133	1152.04	157.468	82.8974
2002			3.	Vision disorders, age-related		1677.42	1677.42	1677.42		763.488	913.93		10.0423	27.6027	1302.45	242.206	95.1207
2002			4.	Hearing loss, adult onset		1221.34	1221.34	1221.34		625.247	596.088		0	0	970.407	195.448	55.4801
2002		G.	Cardiovascular diseases			7136.14	7136.14	7136.14		3918.36	3217.79		501.899	239.683	3347.77	1493.48	1553.32
2002			1.	Rheumatic heart disease		265.521	265.521	265.521		128.555	136.966		13.8684	42.4012	194.464	8.16315	6.62396
2002			2.	Hypertensive heart disease		640.038	640.038	640.038		338.976	301.062		10.453	7.26887	261.9	168.015	192.401
2002			3.	Ischaemic heart disease		3121.05	3121.05	3121.05		1922.04	1199		15.2877	21.2838	1606.07	778.481	699.927
2002			4.	Cerebrovascular disease		1462.7	1462.7	1462.7		793.547	669.152		83.0561	84.1154	626.111	320.397	349.02
2002			5.	Inflammatory heart diseases		323.69	323.69	323.69		184.043	139.647		41.8821	19.1893	152.48	49.2543	60.8848
2002		H.	Respiratory diseases			2040.44	2040.44	2040.44		1215.71	824.735		308.507	267.916	1094.14	187.804	182.071
2002			1.	Chronic obstructive pulmonary disease		678.542	678.542	678.542		460.189	218.353		16.6806	5.22147	448.802	102.837	105.001
2002			2.	Asthma		669.435	669.435	669.435		374.808	294.626		75.9334	213.271	371.471	5.93157	2.82795
2002		I.	Digestive diseases			2173.57	2173.57	2173.57		1091.82	1081.74		213	133.383	1288.8	314.444	223.939
2002			1.	Peptic ulcer disease		89.5872	89.5872	89.5872		55.4436	34.1435		1.56546	2.78974	62.3557	11.3108	11.5655
2002			2.	Cirrhosis of the liver		555.533	555.533	555.533		302.358	253.175		33.1459	21.7437	320.188	113.341	67.114
2002		J.	Genitourinary diseases			995.518	995.518	995.518		554.516	441.002		62.0137	58.6679	598.02	148.572	128.244
2002			1.	Nephritis and nephrosis		515.503	515.503	515.503		276.037	239.466		25.3893	40.9728	277.654	97.1194	74.3679
2002			2.	Benign prostatic hypertrophy		131.239	131.239	131.239		131.239	0		0	0	117.655	7.08177	6.50227
2002		K.	Skin diseases			206.441	206.441	206.441		98.8036	107.637		27.3737	27.2756	117.389	14.2395	20.1634
2002		L.	Musculoskeletal diseases			1114.95	1114.95	1114.95		508.469	606.484		23.5924	90.7186	875.579	88.231	36.832
2002			1.	Rheumatoid arthritis		210.656	210.656	210.656		62.8053	147.851		8.06823	30.7786	154.038	12.1941	5.57704
2002			2.	Osteoarthritis		486.009	486.009	486.009		184.199	301.81		0.190694	1.12744	405.799	58.0351	20.8574
2002		M.	Congenital anomalies			2183.63	2183.63	2183.63		1154.24	1029.39		2044.9	77.9936	57.4402	2.00922	1.29216
2002		N.	Oral conditions			664.276	664.276	664.276		333.354	330.921		77.3628	114.832	411.773	47.1952	13.1131
2002	III.	Injuries				9870.9	9870.9	9870.9		6672.77	3198.13		1283.71	2220.82	6058.75	196.039	111.583
2002		A.	Unintentional injuries			8636.73	8636.73	8636.73		5753.77	2882.96		1257.1	2127.37	4972.67	175.313	104.282
2002			1.	Road traffic accidents		3238.35	3238.35	3238.35		2338.62	899.73		341.721	695.931	2069.2	83.8935	47.607
2002			2.	Poisonings		191.153	191.153	191.153		129.787	61.3663		33.2134	9.72055	141.121	4.70146	2.39662
2002			3.	Falls		1038.53	1038.53	1038.53		599.785	438.743		182.651	339.579	480.918	17.6985	17.6801
2002			4.	Fires		617.097	617.097	617.097		261.584	355.513		127.249	119.087	357.46	6.82453	6.47616
2002			5.	Drownings		420.35	420.35	420.35		334.523	85.8271		92.2819	104.164	218.775	3.64957	1.48077
2002			6.	Other unintentional injuries		3131.25	3131.25	3131.25		2089.47	1041.78		479.983	858.889	1705.19	58.5458	28.6414
2002		B.	Intentional injuries			1234.16	1234.16	1234.16		918.996	315.166		26.6093	93.4492	1086.08	20.7257	7.30054
2002			1.	Self-inflicted injuries		393.418	393.418	393.418		228.338	165.08		3.5974	19.2371	359.423	8.16545	2.99515
2002			2.	Violence		504.984	504.984	504.984		407.995	96.9898		14.1444	38.6847	442.406	7.08315	2.66611
2002			3.	War		292.741	292.741	292.741		244.672	48.0696		6.26668	32.8202	247.534	4.69821	1.42258
2015	Population (millions)					396.233	352.719	351.031		198.433	197.801		44.2063	81.8053	242.709	17.027	10.4861
2015		All Causes				69597.8	66278.9	75953.3		37676.5	31921.3		15748.3	5339.01	38705.7	5563.05	4241.79
2015	I.	Communicable, maternal, perinatal and nutritional conditions				15248.4	12352.9	18410.9		7961.41	7287.03		9707.18	834.66	4312.6	206.929	187.083
2015		A.	Infectious and parasitic diseases			6493.52	5064.04	8080.22		3702.94	2790.58		3017.03	314.023	2904.01	145.083	113.367
2015			1.	Tuberculosis		375.913	252.817	479.226		186.967	188.946		51.666	21.5148	262.031	26.787	13.9135
2015			2.	STDs excluding HIV		364.171	305.075	416.166		100.939	263.232		21.1972	5.12042	326.447	8.10057	3.30582
2015			3.	HIV/AIDS		1763.39	1445.82	2165.36		1337.95	425.436		36.0541	15.897	1703.12	7.7655	0.556219
2015			4.	Diarrhoeal diseases		1705.9	1390.81	2195.84		904.846	801.055		1515.48	60.8684	102.926	11.7618	14.8613
2015			5.	Childhood-cluster diseases		356.425	250.467	441.443		180.636	175.789		323.939	27.5098	4.76763	0.105872	0.102732
2015				a.	Pertussis	154.705	110.86	191.54		78.1822	76.5225		149.887	4.81802	0	0	0
2015				d.	Measles	146.882	98.8065	181.83		74.7038	72.1778		125.465	20.8727	0.544373	0	0
2015				e.	Tetanus	51.8238	37.9091	64.9871		26.2215	25.6023		48.0669	1.37698	2.24241	0.0898189	0.0476914
2015			6.	Meningitis		237.947	167.999	297.113		108.895	129.052		199.902	15.8993	19.0524	1.72793	1.36493
2015			7.	Hepatitis B and C		100.277	78.9129	124.813		59.1004	41.1762		26.4315	6.59554	44.8874	12.7946	9.56753
2015			8.	Malaria		175.349	136.041	233.161		86.9263	88.4225		107.858	24.9936	39.3896	1.89014	1.21776
2015			9.	Tropical-cluster diseases		195.955	148.437	243.387		126.758	69.1968		7.1338	35.3021	124.626	14.5826	14.3105
2015			10.	Leprosy		1.64281	1.4054	1.7665		0.863909	0.778896		0.0460631	0.245603	0.859567	0.208964	0.282608
2015			11.	Dengue		5.0049	3.47135	5.86926		3.13548	1.86942		0.805799	3.54404	0.552908	0.0506747	0.0514792
2015			12.	Japanese encephalitis		0	0	0		0	0		0	0	0	0	0
2015			13.	Trachoma		161.773	139.109	200.494		49.111	112.662		0.2905	0.8123	111.851	27.9715	20.848
2015			14.	Intestinal nematode infections		71.9386	51.9407	85.2698		37.6649	34.2736		9.44878	49.9085	11.6574	0.664702	0.259271
2015		B.	Respiratory infections			2330.11	1704.34	2866.91		1242.3	1087.81		1760.4	241.795	218.991	47.2921	61.6315
2015		C.	Maternal conditions			962.766	778.598	1260.83		0	962.766		0	12.8138	949.952	0	0
2015		D.	Perinatal conditions			3890.62	3531.69	4338.86		2226.29	1664.34		3890.62	0	0	0	0
2015		E.	Nutritional deficiencies			1571.42	1274.26	1864.12		789.878	781.542		1039.12	266.028	239.639	14.5533	12.0843
2015			1.	Protein-energy malnutrition		558.982	449.681	662.527		291.716	267.265		546.755	5.75802	3.11372	1.61399	1.74094
2015			2.	Iodine deficiency		488.049	400.277	563.06		251.39	236.659		375.658	111.709	0.324441	0.148627	0.20961
2015			3.	Vitamin A deficiency		3.40812	2.38893	4.031		2.00037	1.40776		0.745947	0.297326	1.45981	0.459708	0.44533
2015			4.	Iron-deficiency anaemia		483.595	396.08	588.55		223.743	259.851		82.4152	146.332	233.649	11.9183	9.28014
2015	II.	Noncommunicable diseases				42656.6	41798.2	44972.6		21742.2	20914.4		4554.42	2360.41	26765.3	5069.87	3906.58
2015		A.	Malignant neoplasms			3066.07	3019.74	3163.82		1612.1	1453.97		120.885	163.109	1953.92	518.935	309.22
2015			1.	Mouth and oropharynx cancers		90.2797	87.1722	93.6282		62.705	27.5747		1.28628	1.79914	63.4449	15.6373	8.11206
2015			2.	Oesophagus cancer		71.4484	70.1789	73.2546		40.3415	31.107		0.322826	0.485796	41.4303	18.0655	11.144
2015			3.	Stomach cancer		251.188	246.301	257.41		144.564	106.623		0.913371	2.99258	151.737	58.1492	37.3954
2015			4.	Colon and rectum cancers		178.719	174.539	182.811		99.6885	79.0306		0.226135	2.12818	126.529	30.2561	19.5795
2015			5.	Liver cancer		138.981	136.88	142.843		82.3906	56.5904		2.69451	2.40388	85.7699	31.2286	16.8842
2015			6.	Pancreas cancer		55.472	54.0324	56.8702		32.538	22.9341		0.0361454	0.16243	32.9279	13.7765	8.56908
2015			7.	Trachea, bronchus, lung cancers		340.496	331.903	385.083		256.124	84.3716		0.000207395	0.00138262	203.393	90.8315	46.2699
2015			8.	Melanoma and other skin cancers		19.6485	19.1872	20.199		9.69032	9.95813		0.270867	0.273437	13.1678	3.41319	2.52318
2015			9.	Breast cancer		311.79	304.694	316.446		0.0719791	311.718		0.0461605	0.450479	257.715	36.9483	16.6304
2015			10.	Cervix uteri cancer		106.187	110.658	104.977		0	106.187		0.164979	0.762691	81.1664	17.4255	6.66725
2015			11.	Corpus uteri cancer		30.6145	36.8088	28.0345		0	30.6145		0.000571399	0.160556	23.4799	4.11038	2.86312
2015			12.	Ovary cancer		50.2193	50.4303	50.4462		0	50.2193		0.135295	1.65954	39.3142	5.89032	3.21994
2015			13.	Prostate cancer		58.7022	57.8777	59.7605		58.7022	0		0.140799	0.329874	19.4093	18.107	20.7153
2015			14.	Bladder cancer		212.668	208.947	217.616		172.095	40.5724		0.395103	0.506839	122.04	53.8456	35.8803
2015			15.	Lymphomas, multiple myeloma		290.016	283.547	296.168		175.738	114.279		15.4376	44.7122	187.218	27.2096	15.4389
2015			16.	Leukaemia		375.509	370.921	382.205		212.489	163.02		47.3545	67.9274	227.269	21.068	11.8895
2015		B.	Other neoplasms			352.63	346.877	361.164		189.371	163.259		14.3621	21.4344	231.56	53.3585	31.9156
2015		C.	Diabetes mellitus			1308.21	1194.77	1411.61		457.867	850.338		5.5239	9.93885	960.611	199.915	132.217
2015		D.	Endocrine disorders			572.268	532.734	619.087		292.604	279.664		144.88	46.2114	270.938	63.0237	47.2154
2015		E.	Neuropsychiatric conditions			10928.7	10863	11044.5		5341.98	5586.69		1021.69	1091.37	8318.84	286.354	210.417
2015			1.	Unipolar depressive disorders		3544.69	3548.94	3536.82		1419.74	2124.96		0.342877	309.07	3092.65	121.424	21.2094
2015			2.	Bipolar disorder		931.669	922.649	947.045		469.432	462.236		0.0764858	48.6762	882.528	0.365514	0.0230153
2015			3.	Schizophrenia		1147.04	1138.5	1161.88		579.7	567.34		0	70.114	1073.89	2.42965	0.607773
2015			4.	Epilepsy		323.49	310.466	340.406		175.196	148.293		25.8896	66.0951	220.251	7.43531	3.81865
2015			5.	Alcohol use disorders		95.0224	91.7594	103.447		88.9893	6.03302		0	0.327476	91.7453	2.02209	0.927483
2015			6.	Alzheimer and other dementias		294.347	295.403	291.911		126.915	167.432		27.7334	13.0899	53.0783	69.6494	130.796
2015			7.	Parkinson disease		85.64	82.8403	90.8371		48.2281	37.4119		6.26335	4.95435	52.1162	12.8067	9.49935
2015			8.	Multiple sclerosis		88.0009	87.7558	88.4707		38.4833	49.5176		0	9.34525	76.178	1.57513	0.902501
2015			9.	Drug use disorders		1122.68	1106.91	1161.25		933.281	189.402		0	14.0302	1101.61	5.80204	1.23938
2015			10.	Post-traumatic stress disorder		228.772	228.942	228.469		61.6936	167.079		0.0154439	2.43191	225.345	0.711549	0.268599
2015			11.	Obsessive-compulsive disorder		497.823	496.967	499.437		216.679	281.143		0	122.664	368.911	5.63714	0.611019
2015			12.	Panic disorder		456.442	454.417	459.897		154.191	302.251		0	13.4986	441.49	0.962389	0.491597
2015			13.	Insomnia (primary)		122.402	122.618	122.007		42.8293	79.5723		0	4.70065	104.2	10.8084	2.69234
2015			14.	Migraine		320.121	318.099	323.572		96.7019	223.419		20.1459	221.033	78.9112	0.0265375	0.00465049
2015		F.	Sense organ diseases			6925.58	7327.32	7319.11		3206.02	3719.57		28.8981	134.857	5428.76	975.611	357.456
2015			1.	Glaucoma		958.273	960.283	954.274		393.174	565.099		5.4652	43.1815	754.71	111.458	43.4572
2015			2.	Cataracts		1797.74	2107.1	2093		843.852	953.893		11.9223	65.6442	1395.83	216.533	107.815
2015			3.	Vision disorders, age-related		2373.65	2474.65	2455.78		1071.42	1302.23		10.9813	25.64	1849.8	356.352	130.881
2015			4.	Hearing loss, adult onset		1789.35	1778.88	1809.27		894.174	895.178		0	0	1427.79	289.754	71.8103
2015		G.	Cardiovascular diseases			8760.5	8356.35	9508.8		4841.63	3918.87		551.669	173.106	4089.57	1900.87	2045.29
2015			1.	Rheumatic heart disease		263.258	239.007	300.487		139.987	123.271		15.1043	27.3627	201.474	10.5234	8.79425
2015			2.	Hypertensive heart disease		800.392	759.904	875.583		433.55	366.842		11.7623	5.77596	315.06	204.699	263.095
2015			3.	Ischaemic heart disease		3952.07	3774.96	4285.06		2420.89	1531.18		17.3585	18.0444	2028.76	992.945	894.965
2015			4.	Cerebrovascular disease		1813.97	1719.62	1941.21		965.045	848.923		94.037	66.3244	774.922	416.473	462.211
2015			5.	Inflammatory heart diseases		375.447	360.024	414.191		215.127	160.32		45.6714	12.3498	175.731	61.7346	79.9602
2015		H.	Respiratory diseases			2621.92	2445.8	2905.35		1622.28	999.633		324.047	283.061	1487.64	276.567	250.606
2015			1.	Chronic obstructive pulmonary disease		1008.01	926.931	1197.89		711.278	296.728		16.803	4.23615	683.362	156.363	147.242
2015			2.	Asthma		790.565	774.505	807.791		448.746	341.819		88.4263	235.329	453.842	8.85282	4.11567
2015		I.	Digestive diseases			2197.93	1996.69	2481.98		1137.15	1060.78		163.301	79.993	1338.63	366.043	249.965
2015			1.	Peptic ulcer disease		95.692	87.2649	107.733		61.0198	34.6722		1.27812	1.62682	65.8867	13.719	13.1813
2015			2.	Cirrhosis of the liver		583.03	533.19	655.971		325.08	257.95		28.9943	14.0061	342.757	124.782	72.4901
2015		J.	Genitourinary diseases			1175.33	1119.46	1249.74		696.248	479.082		47.7132	37.707	718.113	199.491	172.305
2015			1.	Nephritis and nephrosis		577.579	548.336	617.695		319.333	258.246		19.0273	26.5919	306.798	127.682	97.4797
2015			2.	Benign prostatic hypertrophy		198.907	199.561	197.426		198.907	0		0	0	180.687	9.78968	8.42999
2015		K.	Skin diseases			271.287	269.375	272.297		124.732	146.555		31.6234	29.9095	156.549	21.5848	31.6205
2015		L.	Musculoskeletal diseases			1504.7	1490.68	1531.49		668.527	836.178		26.0513	98.5687	1197.65	133.575	48.8598
2015			1.	Rheumatoid arthritis		278.03	276.505	280.854		80.9037	197.127		9.49157	33.5739	208.99	18.5302	7.44506
2015			2.	Osteoarthritis		695.862	691.564	703.845		260.727	435.135		0.172012	1.13841	578.147	88.8901	27.5151
2015		M.	Congenital anomalies			2107.1	1969.09	2242.56		1125.32	981.786		1981.63	63.5428	57.7269	2.56744	1.63078
2015		N.	Oral conditions			864.395	866.328	861.101		426.332	438.063		92.1398	127.604	554.814	71.973	17.8645
2015	III.	Injuries				11692.8	12127.8	12569.8		7972.91	3719.86		1486.66	2143.94	7627.79	286.245	148.13
2015		A.	Unintentional injuries			10161.6	10686.1	10762.7		6818.09	3343.49		1455.93	2049.5	6262.77	255.02	138.353
2015			1.	Road traffic accidents		4496.88	4536.79	4268.85		3225.43	1271.45		450.303	785.965	3074.41	124.995	61.2037
2015			2.	Poisonings		213.748	206.567	236.544		146.435	67.3131		35.0754	8.36387	160.783	6.48821	3.03705
2015			3.	Falls		1106.3	1205.49	1243.27		644.201	462.102		206.58	305.047	544.658	25.797	24.2204
2015			4.	Fires		659.169	689.811	742.381		282.741	376.428		138.566	115.884	385.332	10.285	9.10151
2015			5.	Drownings		421.737	385.955	466.811		335.469	86.268		101.06	88.9043	224.814	4.94298	2.01604
2015			6.	Other unintentional injuries		3263.74	3661.49	3804.88		2183.81	1079.93		524.343	745.339	1872.77	82.5118	38.7746
2015		B.	Intentional injuries			1531.2	1441.65	1807.05		1154.83	376.376		30.7365	94.4414	1365.02	31.2244	9.77665
2015			1.	Self-inflicted injuries		488.96	478.42	515.156		292.964	195.996		4.00524	18.5665	450.52	11.9633	3.90532
2015			2.	Violence		609.822	581.695	679.952		495.179	114.642		16.1916	35.8795	543.487	10.714	3.54972
2015			3.	War		375.702	325.353	551.822		316.353	59.3487		7.30729	36.619	322.267	7.45866	2.0496
2030	Population (millions)					481.891	442.931	433.79		237.232	244.658		42.9658	86.2374	305.878	28.0853	18.724
2030		All Causes				78136.3	73205.8	88463.4		42547.8	35588.5		11334	4863.36	47129	7938.14	6871.81
2030	I.	Communicable, maternal, perinatal and nutritional conditions				12191.4	7643.75	15999		6829.11	5362.28		6117.47	524.998	5117.86	223.052	208.014
2030		A.	Infectious and parasitic diseases			6406.78	3699.62	8155.2		3910.79	2495.99		1668.5	228.813	4223.08	160.544	125.844
2030			1.	Tuberculosis		205.81	84.0317	400.31		100.768	105.042		21.1785	10.0065	147.699	17.5485	9.3772
2030			2.	STDs excluding HIV		288.448	197.111	363.472		87.1357	201.312		14.8587	3.36921	258.498	7.56621	4.15544
2030			3.	HIV/AIDS		3535.58	1949.19	3693.73		2436.96	1098.62		56.8615	61.8982	3373.11	40.9971	2.71566
2030			4.	Diarrhoeal diseases		961.816	728.541	1588.19		527.07	434.745		810.482	38.4682	84.7247	11.5465	16.5943
2030			5.	Childhood-cluster diseases		193.009	88.9542	295.061		101.46	91.5484		173.794	16.5911	2.44209	0.0774679	0.103407
2030				a.	Pertussis	85.2785	41.3185	130.418		44.5581	40.7203		80.4605	4.81802	0	0	0
2030				d.	Measles	81.9072	34.9559	124.134		43.3729	38.5343		70.3161	11.0467	0.544373	0	0
2030				e.	Tetanus	24.9267	11.9107	39.5231		13.0746	11.8521		22.7866	0.611842	1.40681	0.0720971	0.0493634
2030			6.	Meningitis		132.746	62.9992	209.715		63.5345	69.2119		110.575	7.34299	11.6327	1.61789	1.57755
2030			7.	Hepatitis B and C		69.099	42.5578	101.189		41.2378	27.8612		15.0635	2.97079	31.2561	9.92396	9.88474
2030			8.	Malaria		86.7073	46.4994	141.506		45.4788	41.2285		45.7806	12.8042	25.4462	1.42568	1.25066
2030			9.	Tropical-cluster diseases		135.104	78.6926	195.276		88.6009	46.5029		3.97494	18.5031	88.505	10.2108	13.91
2030			10.	Leprosy		1.52977	1.00672	1.84162		0.788299	0.741473		0.0236052	0.115617	0.680656	0.260241	0.449653
2030			11.	Dengue		1.94663	1.05493	2.88748		1.30164	0.644986		0.243129	1.29854	0.304498	0.0481939	0.0522605
2030			12.	Japanese encephalitis		0	0	0		0	0		0	0	0	0	0
2030			13.	Trachoma		111.774	80.8449	157.982		36.3397	75.4346		0.131736	0.314547	69.9078	20.5665	20.8537
2030			14.	Intestinal nematode infections		49.2809	26.4155	67.5222		26.5972	22.6837		6.37345	31.9765	9.66939	0.87365	0.387895
2030		B.	Respiratory infections			1375.5	713.962	2066.78		766.06	609.44		943.933	133.685	180.682	47.9245	69.276
2030		C.	Maternal conditions			550.972	413.758	936.485		0	550.972		0	12.7666	538.206	0	0
2030		D.	Perinatal conditions			2819.52	2141.34	3421.23		1606.05	1213.46		2819.52	0	0	0	0
2030		E.	Nutritional deficiencies			1038.63	675.064	1419.35		546.21	492.421		685.521	149.733	175.899	14.5833	12.8943
2030			1.	Protein-energy malnutrition		361.793	230.09	493.302		195.883	165.91		352.694	2.90603	2.18694	1.77633	2.22975
2030			2.	Iodine deficiency		334.993	223.087	442.896		177.57	157.423		265.628	68.8388	0.232064	0.109004	0.184631
2030			3.	Vitamin A deficiency		3.20596	1.59534	4.36427		1.97124	1.23471		0.453178	0.189278	1.36473	0.607848	0.590921
2030			4.	Iron-deficiency anaemia		316.816	210.292	444.199		157.958	158.857		47.3164	76.9592	171.32	11.7467	9.4735
2030	II.	Noncommunicable diseases				52542.1	50854.6	57288		26548.4	25993.7		3781	2270.28	32820.9	7269.78	6400.18
2030		A.	Malignant neoplasms			4183.15	4016.06	4450.39		2218.27	1964.88		127.065	175.119	2568.68	801.303	510.982
2030			1.	Mouth and oropharynx cancers		121.539	113.152	129.098		83.5336	38.005		1.26855	1.99076	79.7231	25.2075	13.3486
2030			2.	Oesophagus cancer		101.149	97.8004	104.742		57.0144	44.1347		0.2419	0.425782	55.3669	26.6712	18.4433
2030			3.	Stomach cancer		348.793	335.045	361.078		203.04	145.753		0.654884	2.63554	197.96	85.1327	62.4098
2030			4.	Colon and rectum cancers		239.758	227.043	249.609		134.252	105.506		0.204602	1.9303	160.492	45.3286	31.8025
2030			5.	Liver cancer		187.268	182.313	194.233		111.965	75.3025		2.60155	2.30905	109.946	45.2707	27.1406
2030			6.	Pancreas cancer		78.1626	73.8669	81.3762		45.8906	32.272		0.0362837	0.158124	43.6862	20.3682	13.9137
2030			7.	Trachea, bronchus, lung cancers		567.002	538.217	724.889		430.498	136.504		0.000207395	0.00138262	326.193	159.203	81.6039
2030			8.	Melanoma and other skin cancers		26.0834	24.5337	27.3464		13.1087	12.9747		0.182861	0.242669	16.5083	4.98451	4.16506
2030			9.	Breast cancer		414.746	387.172	429.994		0.0976461	414.648		0.043233	0.40464	329.538	56.5367	28.2229
2030			10.	Cervix uteri cancer		156.241	160.712	150.445		0	156.241		0.114507	1.0815	116.459	26.9267	11.6592
2030			11.	Corpus uteri cancer		60.4339	71.9891	50.6353		0	60.4339		0.000745512	0.128411	46.8337	8.23498	5.23607
2030			12.	Ovary cancer		70.5782	67.8381	71.2144		0	70.5782		0.233677	2.66845	52.7207	9.44008	5.51531
2030			13.	Prostate cancer		89.3324	87.923	90.7741		89.3324	0		0.177001	0.393303	28.2915	28.0985	32.3721
2030			14.	Bladder cancer		291.719	283.451	298.899		235.817	55.9018		0.413714	0.480324	162.022	73.7335	55.069
2030			15.	Lymphomas, multiple myeloma		370.958	349.557	386.468		221.216	149.743		17.8281	50.2777	233.831	44.2343	24.7874
2030			16.	Leukaemia		437.155	420.31	451.981		248.406	188.75		49.5925	72.9135	264.316	31.5355	18.7983
2030		B.	Other neoplasms			453.731	435.488	472.173		242.569	211.162		14.9317	21.8754	288.002	77.0081	51.9131
2030		C.	Diabetes mellitus			1674.45	1399.37	1911.71		601.836	1072.61		4.49589	7.75889	1141.55	296.567	224.068
2030		D.	Endocrine disorders			600.116	532.135	673.101		310.676	289.44		94.1514	34.5894	311.411	84.9443	75.0202
2030		E.	Neuropsychiatric conditions			12655	12560.5	12796.4		6032.89	6622.11		810.403	1118.3	9900.37	461.637	364.292
2030			1.	Unipolar depressive disorders		4481.74	4510.83	4444.79		1758.24	2723.5		0.246321	325.744	3915.36	201.297	39.0889
2030			2.	Bipolar disorder		1034.55	1019.78	1056.57		517.631	516.924		0.0549175	49.9726	983.902	0.586164	0.0389273
2030			3.	Schizophrenia		1294.87	1281.66	1315.33		643.615	651.253		0	72.838	1217.1	3.86275	1.06988
2030			4.	Epilepsy		343.996	319.805	372.101		187.042	156.954		20.7244	61.2772	243.938	11.7232	6.33265
2030			5.	Alcohol use disorders		104.768	97.4985	118.813		97.8068	6.96104		0	0.327064	99.6733	3.19357	1.5739
2030			6.	Alzheimer and other dementias		457.641	467.49	440.514		182.073	275.568		26.6009	13.4673	73.6129	115.148	228.811
2030			7.	Parkinson disease		106.853	100.503	115.541		61.4949	45.3583		4.53382	4.00829	63.2472	19.3623	15.7016
2030			8.	Multiple sclerosis		103.28	103.035	103.72		44.7386	58.5413		0	9.76112	89.84	2.23915	1.43963
2030			9.	Drug use disorders		1242.88	1201.9	1313.58		1035.45	207.437		0	14.3245	1219	7.67005	1.89191
2030			10.	Post-traumatic stress disorder		278.376	279.769	276.836		74.3071	204.069		0.0111168	2.52955	274.136	1.19528	0.503539
2030			11.	Obsessive-compulsive disorder		575.929	576.336	576.386		245.895	330.034		0	127.977	437.371	9.46691	1.11426
2030			12.	Panic disorder		518.083	515.816	522.029		173.518	344.565		0	14.0074	501.578	1.59014	0.907934
2030			13.	Insomnia (primary)		168.487	169.924	166.63		54.5553	113.932		0	4.96646	140.604	17.9862	4.93037
2030			14.	Migraine		339.005	336.125	343.307		100.519	238.486		18.9365	227.896	92.1201	0.0443823	0.00845868
2030		F.	Sense organ diseases			9377.07	10539.6	10358.7		4298.37	5078.69		23.6161	120.766	7075.9	1530.91	625.872
2030			1.	Glaucoma		1340.79	1354.35	1321.31		535.895	804.894		4.94528	46.4715	1025	185.658	78.7162
2030			2.	Cataracts		2126.12	2955.59	2878.16		1018.21	1107.91		9.38851	50.4827	1569.68	314.286	182.276
2030			3.	Vision disorders, age-related		3323.14	3655.56	3553.77		1481.31	1841.83		8.89534	23.5039	2494.48	563.899	232.362
2030			4.	Hearing loss, adult onset		2578.38	2565.74	2596.61		1258.7	1319.69		0	0	1985.99	465.133	127.265
2030		G.	Cardiovascular diseases			11246.8	10234.2	12596.2		6074.31	5172.49		516.937	117.513	4787.47	2499.95	3324.93
2030			1.	Rheumatic heart disease		255.031	210.18	317.461		144.801	110.23		13.8053	16.2693	196.472	14.0395	14.4446
2030			2.	Hypertensive heart disease		1050.82	959.357	1189.56		554.116	496.7		11.5969	4.35702	352.434	257.031	425.398
2030			3.	Ischaemic heart disease		5228.01	4768.67	5861.8		3093.39	2134.62		17.2549	13.9669	2455.91	1303.21	1437.67
2030			4.	Cerebrovascular disease		2398.84	2152.79	2605.65		1226.82	1172.02		94.3254	47.3034	921.007	565.064	771.141
2030			5.	Inflammatory heart diseases		452.286	415.591	519.668		253.223	199.062		41.0597	7.75271	194.745	79.6007	129.128
2030		H.	Respiratory diseases			3303.36	2868.85	4107.49		2099.15	1204.21		282.703	288.03	1902.91	418.265	411.445
2030			1.	Chronic obstructive pulmonary disease		1430.28	1193.81	2026.75		1022.79	407.496		13.5462	3.50237	929.874	240.32	243.042
2030			2.	Asthma		890.413	854.628	932.1		512.355	378.058		85.6438	247.86	535.022	14.7915	7.09604
2030		I.	Digestive diseases			2371.81	1937.89	2898.82		1265.83	1105.98		107.98	46.1016	1420.21	442.145	355.37
2030			1.	Peptic ulcer disease		108.802	90.5762	131.246		71.1716	37.6303		0.880389	0.952479	69.8815	17.5927	19.4948
2030			2.	Cirrhosis of the liver		651.245	532.296	798.979		373.905	277.34		21.218	8.80255	380.433	139.912	100.879
2030		J.	Genitourinary diseases			1506.99	1400.1	1626.57		934.339	572.653		30.3874	22.6414	894.423	281.319	278.222
2030			1.	Nephritis and nephrosis		702.557	644.633	769.236		396.873	305.684		12.1928	15.76	349.569	171.826	153.209
2030			2.	Benign prostatic hypertrophy		309.382	313.737	302.224		309.382	0		0	0	281.729	14.7957	12.8575
2030		K.	Skin diseases			350.967	348.855	350.704		151.728	199.239		31.3011	31.2335	196.39	36.2103	55.8328
2030		L.	Musculoskeletal diseases			1970.35	1948.29	2006.88		840.747	1129.61		23.8522	102.663	1539.05	217.555	87.2352
2030			1.	Rheumatoid arthritis		357.233	355.02	360.634		102.086	255.147		9.09437	34.8978	269.805	30.1732	13.2618
2030			2.	Osteoarthritis		964.381	958.603	974.124		350.498	613.884		0.124073	1.12291	767.403	146.074	49.6565
2030		M.	Congenital anomalies			1734.38	1508.92	1939.63		939.561	794.824		1623.17	48.3685	56.5749	3.69691	2.57726
2030		N.	Oral conditions			1113.92	1124.33	1099.3		538.093	575.829		90.0136	135.319	737.901	118.269	32.4205
2030	III.	Injuries				13402.8	14707.5	15176.4		9170.29	4232.49		1435.5	2068.08	9190.27	445.315	263.613
2030		A.	Unintentional injuries			11558.8	13075	12943		7767.03	3791.81		1404.86	1972.64	7541.25	393.622	246.476
2030			1.	Road traffic accidents		5906.73	6067.85	5506.64		4199.02	1707.71		494.811	900.076	4210.13	193.866	107.848
2030			2.	Poisonings		231.252	215.275	277.058		161.267	69.9844		29.9861	7.11796	178.623	10.0077	5.51646
2030			3.	Falls		1137.85	1403.19	1433.73		664.858	472.995		192.347	267.754	593.69	40.5678	43.4937
2030			4.	Fires		667.949	761.886	832.921		281.537	386.412		121.711	108.569	404.328	16.2327	17.1084
2030			5.	Drownings		389.446	325.599	470.596		310.828	78.618		91.6981	71.0977	215.996	7.24234	3.41178
2030			6.	Other unintentional injuries		3225.62	4301.16	4422.09		2149.53	1076.09		474.307	618.028	1938.48	125.706	69.0981
2030		B.	Intentional injuries			1843.93	1632.51	2233.35		1403.25	440.675		30.6356	95.4374	1649.02	51.6923	17.1366
2030			1.	Self-inflicted injuries		609.338	590.493	649.573		375.959	233.379		4.21542	19.1465	559.221	19.7176	7.03792
2030			2.	Violence		722.763	661.709	839.123		593.881	128.882		15.392	33.5351	649.942	17.5882	6.30535
2030			3.	War		438.925	308.195	665.899		368.396	70.529		7.43385	38.7755	376.534	12.8147	3.36761

## Sheet: South Asia
DALYs by cause, scenario, sex and age for the years 2002, 2015 and 2030
Source: Mathers CD, Loncar D (2006). Projections of global mortality and burden of disease from 2002 to 2030.
South Asia
						Total DALYs ('000)				Baseline DALYs ('000)			Baseline projections ('000) by age group
Year		Cause				Baseline	Optimistic	Pessimistic		Male	Female		0-4	5-14	15-59	60-69	70+
2002	Population (millions)					1412.22	1412.22	1412.22		726.993	685.223		171.544	320.937	818.287	62.4834	38.9642
2002		All Causes				409898	409898	409898		203887	206011		143862	36747.3	184302	26745	18241
2002	I.	Communicable, maternal, perinatal and nutritional conditions				194366	194366	194366		94722.6	99643.3		120706	15683.6	51457.7	3737.7	2781.47
2002		A.	Infectious and parasitic diseases			92347.6	92347.6	92347.6		49106.1	43241.5		48297	9027.79	32041.6	1855.99	1125.26
2002			1.	Tuberculosis		12220.9	12220.9	12220.9		7328.08	4892.78		347.524	567.108	10160.2	874.755	271.307
2002			2.	STDs excluding HIV		4386.51	4386.51	4386.51		1444.84	2941.67		1661.9	47.138	2537.64	97.2232	42.6038
2002			3.	HIV/AIDS		9540.23	9540.23	9540.23		7023.57	2516.66		619.17	152.675	8714.67	50.2212	3.48993
2002			4.	Diarrhoeal diseases		23563.3	23563.3	23563.3		12288.8	11274.5		22129.6	410.147	778.887	111.856	132.881
2002			5.	Childhood-cluster diseases		15405	15405	15405		7668.07	7736.93		14426.8	821.785	151.189	3.6872	1.56744
2002				a.	Pertussis	5403.3	5403.3	5403.3		2691.43	2711.86		5372.86	30.431	0	0	0
2002				d.	Measles	6563.74	6563.74	6563.74		3269.88	3293.86		5889.18	673.772	0.787846	0	0
2002				e.	Tetanus	3275.97	3275.97	3275.97		1631.36	1644.61		3075.42	88.0118	107.438	3.53377	1.56697
2002			6.	Meningitis		2436.6	2436.6	2436.6		1161.83	1274.77		923.69	792.803	633.96	48.7685	37.3795
2002			7.	Hepatitis B and C		816.487	816.487	816.487		537.338	279.149		9.05512	32.3485	706.689	41.1846	27.2096
2002			8.	Malaria		1256.72	1256.72	1256.72		628.5	628.22		585.359	307.081	341.41	15.457	7.41231
2002			9.	Tropical-cluster diseases		4504.24	4504.24	4504.24		3102.77	1401.47		257.702	1578.98	2623.69	34.7572	9.11013
2002			10.	Leprosy		124.737	124.737	124.737		70.0486	54.6886		16.7949	34.5356	67.4807	3.29506	2.63089
2002			11.	Dengue		283.42	283.42	283.42		131.219	152.201		51.9525	205.211	22.8391	1.89224	1.52504
2002			12.	Japanese encephalitis		343.296	343.296	343.296		150.756	192.54		104.107	91.94	142.049	3.35267	1.84822
2002			13.	Trachoma		178.497	178.497	178.497		50.6827	127.814		1.29908	1.23028	124.353	32.4815	19.1328
2002			14.	Intestinal nematode infections		828.966	828.966	828.966		423.184	405.782		108.09	583.787	128.463	5.63111	2.99488
2002		B.	Respiratory infections			36875.7	36875.7	36875.7		18128.8	18746.8		24900.1	4926.26	3820.19	1685.63	1543.46
2002		C.	Maternal conditions			12536	12536	12536		0	12536		0	96.2767	12439.7	0	0
2002		D.	Perinatal conditions			40899.8	40899.8	40899.8		22157.9	18741.9		40899.8	0	0	0	0
2002		E.	Nutritional deficiencies			11706.8	11706.8	11706.8		5329.83	6376.98		6608.59	1633.23	3156.16	196.089	112.744
			1.	Protein-energy malnutrition		6099.92	6099.92	6099.92		2951.09	3148.83		4955.98	947.747	182.883	9.24147	4.06161
			2.	Iodine deficiency		602.43	602.43	602.43		296.726	305.704		436.022	165.911	0.472953	0.0125724	0.0119369
			3.	Vitamin A deficiency		158.596	158.596	158.596		76.5996	81.9961		65.1392	93.1666	0.288439	0	0.00138581
			4.	Iron-deficiency anaemia		4184.03	4184.03	4184.03		1752.7	2431.33		804.797	357.942	2840.88	143.689	36.7295
2002	II.	Noncommunicable diseases				164551	164551	164551		81212.2	83338.3		18141.6	10527.4	99425.8	21773.9	14681.8
2002		A.	Malignant neoplasms			11350.8	11350.8	11350.8		5521.92	5828.9		432.514	490.041	6405.88	2623.86	1398.53
2002			1.	Mouth and oropharynx cancers		1538.08	1538.08	1538.08		1044.6	493.474		8.43416	11.5854	837.826	467.819	212.412
2002			2.	Oesophagus cancer		825.269	825.269	825.269		447.456	377.813		1.75495	3.11941	427.635	268.02	124.739
2002			3.	Stomach cancer		477.265	477.265	477.265		300.804	176.461		0.539247	2.27708	270.513	131.278	72.658
2002			4.	Colon and rectum cancers		395.29	395.29	395.29		237.411	157.879		0.260692	2.4164	243.461	91.1087	58.0431
2002			5.	Liver cancer		402.795	402.795	402.795		231.053	171.742		13.2497	13.0882	281.19	63.7761	31.4912
2002			6.	Pancreas cancer		130.557	130.557	130.557		75.5416	55.0153		8.6808e-05	0.000446701	72.1085	37.3531	21.0948
2002			7.	Trachea, bronchus, lung cancers		1343.5	1343.5	1343.5		1068.37	275.132		0.356514	2.3082	723.843	417.691	199.302
2002			8.	Melanoma and other skin cancers		33.7373	33.7373	33.7373		17.3687	16.3686		1.36319	2.74692	18.1891	6.89812	4.54
2002			9.	Breast cancer		981.718	981.718	981.718		0.0576267	981.661		0.0837919	0.2693	669.709	207.036	104.62
2002			10.	Cervix uteri cancer		1139.83	1139.83	1139.83		0	1139.83		0.017238	0.665517	778.866	258.634	101.644
2002			11.	Corpus uteri cancer		49.6336	49.6336	49.6336		0	49.6336		2.16574	2.69363	22.0731	12.3856	10.3155
2002			12.	Ovary cancer		259.483	259.483	259.483		0	259.483		0.90778	8.21363	158.535	56.7736	35.0535
2002			13.	Prostate cancer		134.303	134.303	134.303		134.303	0		0.128344	0.302835	19.3512	54.6174	59.9031
2002			14.	Bladder cancer		310.729	310.729	310.729		119.035	191.694		20.7936	8.02875	139.696	79.0877	63.1226
2002			15.	Lymphomas, multiple myeloma		1252.2	1252.2	1252.2		477.912	774.289		79.0051	172.241	700.029	183.088	117.838
2002			16.	Leukaemia		904.58	904.58	904.58		520.339	384.241		156.679	180.708	501.39	41.5835	24.2193
2002		B.	Other neoplasms			342.09	342.09	342.09		189.604	152.486		37.5162	39.7855	224.27	23.1875	17.3316
2002		C.	Diabetes mellitus			3882.78	3882.78	3882.78		1996.21	1886.57		76.9526	103.004	2587.05	689.798	425.967
2002		D.	Endocrine disorders			677.948	677.948	677.948		332.842	345.106		366.957	53.3573	199.715	34.4884	23.4302
2002		E.	Neuropsychiatric conditions			43860	43860	43860		19977	23882.9		3499.74	4845.54	33009.4	1239.32	1265.95
2002			1.	Unipolar depressive disorders		19411.1	19411.1	19411.1		7575.77	11835.4		0	1843.38	16817.8	635.467	114.468
2002			2.	Bipolar disorder		3261.96	3261.96	3261.96		1696.71	1565.25		0.074407	208.688	3051.68	1.39789	0.114449
2002			3.	Schizophrenia		4004.48	4004.48	4004.48		1988.2	2016.28		0.6036	354.243	3609.81	25.5061	14.3214
2002			4.	Epilepsy		2099.21	2099.21	2099.21		1037.43	1061.78		480.876	614.724	959.862	26.3961	17.3541
2002			5.	Alcohol use disorders		1562.83	1562.83	1562.83		1504.47	58.3611		0	29.0018	1491.71	34.7699	7.34641
2002			6.	Alzheimer and other dementias		1274.38	1274.38	1274.38		549.627	724.748		100.973	46.6795	141.317	198.392	787.014
2002			7.	Parkinson disease		232.388	232.388	232.388		106.071	126.317		0.452357	0.105951	131.106	44.6617	56.0619
2002			8.	Multiple sclerosis		299.49	299.49	299.49		138.709	160.781		0.990117	38.7085	254.718	3.65349	1.42049
2002			9.	Drug use disorders		1104.6	1104.6	1104.6		947.723	156.878		0	42.0559	1055.29	5.79537	1.45667
2002			10.	Post-traumatic stress disorder		779.56	779.56	779.56		212.807	566.753		0	17.3756	759.198	1.94358	1.04265
2002			11.	Obsessive-compulsive disorder		916.569	916.569	916.569		394.282	522.286		0	25.1502	880.669	8.65225	2.0971
2002			12.	Panic disorder		1630.58	1630.58	1630.58		568.725	1061.85		0	60.011	1564.47	3.999	2.09562
2002			13.	Insomnia (primary)		945.996	945.996	945.996		448.498	497.499		0	21.1568	845.528	62.1776	17.134
2002			14.	Migraine		1898.59	1898.59	1898.59		546.62	1351.97		88.8705	1268.55	541.066	0.100241	0.00912038
2002		F.	Sense organ diseases			17692	17692	17692		8027.23	9664.74		6.63712	17.0902	13608.1	2893.59	1166.54
2002			1.	Glaucoma		182.676	182.676	182.676		79.3367	103.339		3.29875	7.25011	119.265	36.0244	16.8378
2002			2.	Cataracts		8500.44	8500.44	8500.44		3569.16	4931.27		0.475268	7.12371	6297.7	1484.84	710.297
2002			3.	Vision disorders, age-related		1394.3	1394.3	1394.3		588.025	806.278		0.00284184	0.816483	966.711	297.272	129.501
2002			4.	Hearing loss, adult onset		7600.21	7600.21	7600.21		3784.53	3815.68		0	0	6217.62	1074.63	307.951
2002		G.	Cardiovascular diseases			39204.6	39204.6	39204.6		20853.5	18351		1364.64	1056.59	19143.3	9884.43	7755.62
2002			1.	Rheumatic heart disease		2564.24	2564.24	2564.24		1215.07	1349.17		408.357	273.081	1527.06	207.503	148.243
2002			2.	Hypertensive heart disease		1118.53	1118.53	1118.53		589.802	528.728		23.6567	32.6858	573.192	266.261	222.735
2002			3.	Ischaemic heart disease		19351.3	19351.3	19351.3		10926.7	8424.59		125.762	246.612	9980.77	5242.99	3755.13
2002			4.	Cerebrovascular disease		9295.04	9295.04	9295.04		4869.28	4425.75		153.015	100.072	3335.05	3168.93	2537.97
2002			5.	Inflammatory heart diseases		1484.28	1484.28	1484.28		797.553	686.724		181.002	84.0928	882.482	177.791	158.909
2002		H.	Respiratory diseases			14113.3	14113.3	14113.3		7537.1	6576.24		1041.71	1364.6	8167.9	2113.91	1425.21
2002			1.	Chronic obstructive pulmonary disease		7293.76	7293.76	7293.76		3930.85	3362.91		5.37705	1.07056	4377.11	1764.09	1146.1
2002			2.	Asthma		4143.13	4143.13	4143.13		2161.1	1982.03		346.108	1086.34	2607.6	66.4258	36.6575
2002		I.	Digestive diseases			12771.7	12771.7	12771.7		6200.25	6571.4		2099.04	1334.88	7724.84	993.852	619.039
2002			1.	Peptic ulcer disease		1851.66	1851.66	1851.66		1174.35	677.308		122.689	105.854	1375.87	148.814	98.4392
2002			2.	Cirrhosis of the liver		4080.2	4080.2	4080.2		2040.95	2039.24		741.489	458.269	2343.85	347.257	189.329
2002		J.	Genitourinary diseases			3416.67	3416.67	3416.67		2072.84	1343.83		339.002	264.876	2141.94	401.72	269.13
2002			1.	Nephritis and nephrosis		2169.38	2169.38	2169.38		1235.94	933.439		266.06	245.87	1230.22	251.602	175.632
2002			2.	Benign prostatic hypertrophy		575.306	575.306	575.306		575.306	0		0	0	486.056	56.993	32.2568
2002		K.	Skin diseases			820.519	820.519	820.519		451.84	368.679		162.564	144.93	449.039	37.8013	26.1849
2002		L.	Musculoskeletal diseases			5699.14	5699.14	5699.14		2753.24	2945.9		95.3698	391.529	4450.77	550.227	211.246
2002			1.	Rheumatoid arthritis		959.454	959.454	959.454		295.124	664.33		7.79634	118.897	729.547	71.5832	31.6302
2002			2.	Osteoarthritis		2409.61	2409.61	2409.61		946.261	1463.35		0.0379768	2.07	1975.31	342.983	89.2018
2002		M.	Congenital anomalies			8995.2	8995.2	8995.2		4432.79	4562.41		8491.93	186.596	313.646	1.62674	1.3971
2002		N.	Oral conditions			1723.82	1723.82	1723.82		865.766	858.053		126.982	234.602	999.874	286.107	76.2543
2002	III.	Injuries				50981.3	50981.3	50981.3		27951.7	23029.5		5015.41	10536.3	33418.5	1233.37	777.676
2002		A.	Unintentional injuries			40908.2	40908.2	40908.2		21926.4	18981.9		4836.59	9797.23	24538.2	1064.11	672.08
2002			1.	Road traffic accidents		8200.87	8200.87	8200.87		5718.96	2481.91		624.893	1678.42	5618.54	179.314	99.7061
2002			2.	Poisonings		1766.4	1766.4	1766.4		964.453	801.942		57.4668	264.17	1221.84	179.456	43.4576
2002			3.	Falls		5470.67	5470.67	5470.67		3052.91	2417.75		813.855	1839.74	2389.62	192.093	235.359
2002			4.	Fires		6555.09	6555.09	6555.09		1922.27	4632.81		870.186	1223.41	4320.2	86.9392	54.3485
2002			5.	Drownings		2513.48	2513.48	2513.48		1520.22	993.26		371.131	772.538	1292.53	45.3743	31.9088
2002			6.	Other unintentional injuries		16401.7	16401.7	16401.7		8747.54	7654.19		2099.06	4018.95	9695.49	380.932	207.3
2002		B.	Intentional injuries			10073.1	10073.1	10073.1		6025.38	4047.67		178.814	739.111	8880.27	169.259	105.596
2002			1.	Self-inflicted injuries		6639.31	6639.31	6639.31		3479.55	3159.76		0.0496639	395.035	6098.84	86.2326	59.1591
2002			2.	Violence		2587.52	2587.52	2587.52		1785.07	802.45		106.342	306.613	2069.8	65.0486	39.7149
2002			3.	War		684.296	684.296	684.296		635.876	48.4198		48.6473	17.5106	604.096	11.141	2.90133
2015	Population (millions)					1705.72	1532.02	1518.5		866.885	838.839		178.073	340.756	1048.13	83.2277	55.5404
2015		All Causes				386463	362041	437432		202403	184060		95911.7	26427.2	209144	31718.1	23261.3
2015	I.	Communicable, maternal, perinatal and nutritional conditions				136966	112994	176697		74389.9	62576.1		75196.8	7473.79	49169.2	2741.63	2384.46
2015		A.	Infectious and parasitic diseases			69546.8	55632.1	91400		41794.3	27752.5		25420.4	4309.8	37589.1	1287.51	940.037
2015			1.	Tuberculosis		6040.07	4497.12	8633.41		3561.25	2478.81		189.267	253.884	4998.32	452.109	146.491
2015			2.	STDs excluding HIV		3299.36	2750.05	4066.24		1185.37	2113.99		1037.77	31.2542	2122.36	68.9562	39.0222
2015			3.	HIV/AIDS		24357.5	20426.4	27663.6		17637.7	6719.84		350.347	353.152	23458.6	178.208	17.2424
2015			4.	Diarrhoeal diseases		12424.4	9948.6	17819.9		6878.25	5546.19		11331.1	262.642	615.531	84.1209	131.038
2015			5.	Childhood-cluster diseases		7699.3	5693.65	11100.9		4098.82	3600.48		7238.92	373.724	82.4916	2.67185	1.49215
2015				a.	Pertussis	2735.86	2034.54	3953.44		1456.43	1279.43		2705.43	30.431	0	0	0
2015				d.	Measles	3224.95	2364.17	4660.39		1722.84	1502.12		2930.62	293.55	0.787846	0	0
2015				e.	Tetanus	1671.71	1240.93	2396.99		886.711	784.996		1561.68	38.7763	67.206	2.55694	1.4916
2015			6.	Meningitis		1306.01	1024.99	1898.28		694.24	611.769		524.819	324.328	388.661	34.1135	34.0881
2015			7.	Hepatitis B and C		541.125	429.737	754.602		382.25	158.876		5.79964	13.0277	468.174	29.1971	24.9271
2015			8.	Malaria		640.129	488.749	934.564		340.404	299.724		281.57	133.134	207.935	10.8332	6.65669
2015			9.	Tropical-cluster diseases		2531.78	2001.53	3669.49		1849.53	682.249		146.693	679.084	1673.62	24.7011	7.68421
2015			10.	Leprosy		78.979	71.8679	89.935		45.7444	33.2346		10.2087	18.505	45.5898	2.29477	2.38072
2015			11.	Dengue		124.568	94.7758	185.533		62.9595	61.6083		24.1566	83.3643	14.2546	1.35824	1.43394
2015			12.	Japanese encephalitis		190.726	147.242	269.798		96.0491	94.6769		58.5425	37.8939	90.2713	2.33503	1.68332
2015			13.	Trachoma		122.071	98.878	164.479		40.3557	81.715		0.889819	0.503794	80.7667	23.5902	16.3201
2015			14.	Intestinal nematode infections		476.479	389.833	642.769		260.958	215.522		68.6933	305.543	94.5302	4.82133	2.89104
2015		B.	Respiratory infections			20247.5	15654.3	28396.1		10797.8	9449.71		12354	2273.5	2948.21	1319.9	1351.88
2015		C.	Maternal conditions			6476.51	5565.46	9635.05		0	6476.51		0	96.2767	6380.23	0	0
2015		D.	Perinatal conditions			33211.6	29939.8	37550.6		18105.4	15106.2		33211.6	0	0	0	0
2015		E.	Nutritional deficiencies			7483.62	6202.33	9715.21		3692.48	3791.14		4210.88	794.213	2251.75	134.23	92.5464
2015			1.	Protein-energy malnutrition		3727.75	3098.31	4801.74		1929.97	1797.78		3150.82	443.041	125.197	5.5509	3.14178
2015			2.	Iodine deficiency		373.43	308.453	471.843		193.658	179.772		284.241	88.8525	0.320497	0.00759509	0.00835301
2015			3.	Vitamin A deficiency		86.0646	64.7238	119.906		44.6188	41.4458		38.6871	47.1413	0.234803	0	0.0013546
2015			4.	Iron-deficiency anaemia		2881.72	2415.31	3757.41		1341.95	1539.77		536.082	182.088	2027.44	101.665	34.4472
2015	II.	Noncommunicable diseases				193510	190030	203063		95689.2	97820.8		15706.5	9623.67	121128	27299.4	19752.8
2015		A.	Malignant neoplasms			15478.1	14758.2	15769.5		7362.24	8115.84		541.098	594.213	8541.34	3645.06	2156.36
2015			1.	Mouth and oropharynx cancers		2066.76	1952.17	2127.47		1350.86	715.893		10.7638	14.7228	1096.66	623.066	321.546
2015			2.	Oesophagus cancer		1131.57	1070.95	1155.42		585.276	546.296		2.20515	3.83935	576.232	359.724	189.572
2015			3.	Stomach cancer		635.615	602.222	651.089		386.835	248.78		0.666904	2.8339	348.855	172.521	110.739
2015			4.	Colon and rectum cancers		532.107	500.063	543.994		306.624	225.483		0.356801	3.21513	313.234	121.995	93.3061
2015			5.	Liver cancer		508.894	482.926	525.85		287.866	221.029		16.2757	15.028	345.675	84.894	47.0221
2015			6.	Pancreas cancer		175.657	164.719	179.894		97.5841	78.0733		0.000107389	0.000531204	93.9653	49.3131	32.3783
2015			7.	Trachea, bronchus, lung cancers		2080.41	2031.86	2184.44		1682.13	398.279		0	0.00058282	1125.7	644.121	310.587
2015			8.	Melanoma and other skin cancers		45.3682	42.7501	46.2256		21.8882	23.48		1.78589	3.4659	23.6103	9.59307	6.91303
2015			9.	Breast cancer		1390.4	1311.63	1405.98		0.0444941	1390.36		0.100092	0.295936	923.225	299.43	167.35
2015			10.	Cervix uteri cancer		1577.56	1490.87	1590.74		0	1577.56		0.0218909	0.777224	1049.55	369.872	157.337
2015			11.	Corpus uteri cancer		102.738	103.506	85.7637		0	102.738		10.2311	19.8717	37.0415	19.1374	16.456
2015			12.	Ovary cancer		372.424	346.492	373.826		0	372.424		1.31924	11.3559	219.991	83.2	56.5585
2015			13.	Prostate cancer		185.944	175.245	184.871		185.944	0		0.143907	0.3286	25.0534	69.3882	91.03
2015			14.	Bladder cancer		417.814	397.96	419.943		163.216	254.598		25.6446	8.80619	180.474	105.685	97.2045
2015			15.	Lymphomas, multiple myeloma		1620.05	1538.93	1634.7		603.361	1016.69		97.9447	204.215	879.42	250.68	187.79
2015			16.	Leukaemia		1095.48	1061.78	1099.37		614.399	481.083		189.007	210.317	603.472	55.0914	37.5934
2015		B.	Other neoplasms			434.265	416.395	440.503		232.463	201.802		46.2693	47.4142	281.053	32.0215	27.5076
2015		C.	Diabetes mellitus			5537.08	5265.87	5842.54		2798.85	2738.23		65.4237	83.8344	3786.87	969.339	631.618
2015		D.	Endocrine disorders			601.459	558.711	675.292		306.389	295.07		257.229	41.6137	227.593	43.3978	31.6261
2015		E.	Neuropsychiatric conditions			52364.9	52299.9	52656.6		23431.9	28933		2972.32	4928.84	41059.4	1644.4	1759.99
2015			1.	Unipolar depressive disorders		24484.1	24523.1	24388.4		9353.71	15130.4		0	1957.21	21511.7	853.971	161.226
2015			2.	Bipolar disorder		3796.81	3773.67	3884.95		1961.67	1835.14		0.0559678	210.819	3584.02	1.76625	0.149892
2015			3.	Schizophrenia		4722.62	4701.71	4808.17		2302.14	2420.48		0.446133	359.686	4312.06	31.8251	18.6023
2015			4.	Epilepsy		2027.86	1950.28	2193.48		1007.26	1020.61		378.672	541.708	1054.17	31.5033	21.8138
2015			5.	Alcohol use disorders		1904.96	1905.07	1909.52		1833.56	71.4014		0	29.4091	1823.52	42.9067	9.12065
2015			6.	Alzheimer and other dementias		1722.37	1741.3	1701.57		711.269	1011.1		104.116	49.3978	189.164	267.612	1112.08
2015			7.	Parkinson disease		281.65	280.154	284.477		128.313	153.336		0.378256	0.109087	155.699	53.3252	72.1383
2015			8.	Multiple sclerosis		365.843	365.725	365.948		167.254	198.589		0.750951	40.3376	318.201	4.70403	1.84918
2015			9.	Drug use disorders		1343.31	1338.97	1378.98		1155.89	187.42		0	47.3772	1286.61	7.37793	1.94321
2015			10.	Post-traumatic stress disorder		988.348	989.471	985.199		264.369	723.979		0	18.4407	965.757	2.64688	1.50346
2015			11.	Obsessive-compulsive disorder		1137.74	1136.87	1142.26		479.565	658.176		0	26.3314	1096.99	11.5422	2.88002
2015			12.	Panic disorder		1960.8	1955.89	1980.31		676.273	1284.52		0	62.1758	1890.55	5.25417	2.81134
2015			13.	Insomnia (primary)		1216.01	1218.33	1209.99		566.394	649.612		0	22.4576	1086.51	83.1548	23.8845
2015			14.	Migraine		2042.83	2038.37	2067.93		603.383	1439.45		89.2473	1301.93	651.511	0.129588	0.0109308
2015		F.	Sense organ diseases			22241.9	23390.8	23404		9999.43	12242.5		5.94911	15.3895	17005.6	3658.69	1556.26
2015			1.	Glaucoma		242.38	243.366	240.219		99.6075	142.773		3.40853	7.65077	159.476	48.3988	23.4457
2015			2.	Cataracts		10434.2	11558.4	11413.3		4416.92	6017.23		0.394342	5.44605	7630.83	1848.67	948.82
2015			3.	Vision disorders, age-related		1852.24	1903.67	1877.9		761.583	1090.66		0.00252291	0.787167	1280.37	391.892	179.188
2015			4.	Hearing loss, adult onset		9698.38	9671.24	9856.64		4714.84	4983.53		0	0	7927.48	1368.69	402.204
2015		G.	Cardiovascular diseases			45770.8	44398.7	49046		24435.1	21335.7		1335.95	677.682	21909.8	11724.6	10122.8
2015			1.	Rheumatic heart disease		2518.46	2416.04	2815.4		1262.98	1255.47		367.586	159.526	1551.77	244.706	194.869
2015			2.	Hypertensive heart disease		1340.47	1299.68	1438.7		716.222	624.248		24.7907	24.8282	665.323	322.173	303.355
2015			3.	Ischaemic heart disease		22972.2	22255.6	24625.8		12937.1	10035.1		120.856	168.341	11706.8	6179.13	4797.09
2015			4.	Cerebrovascular disease		11503.8	11199.4	12039.1		5944.36	5559.4		165.676	75.3204	4096.76	3799.31	3366.68
2015			5.	Inflammatory heart diseases		1543.27	1492.98	1709.28		852.905	690.367		168.127	50.4194	903.419	210.123	211.184
2015		H.	Respiratory diseases			18202.3	17308.7	19528		10095.9	8106.33		964.159	1336.76	10990.4	2901.45	2009.53
2015			1.	Chronic obstructive pulmonary disease		10496.8	9983.89	11384.5		5909.44	4587.32		4.24758	0.809775	6407.06	2451.08	1633.57
2015			2.	Asthma		4749.31	4605.03	4926.76		2532.12	2217.19		356.512	1107.63	3149.3	87.0234	48.8457
2015		I.	Digestive diseases			11322.9	10649.2	13074.3		5966.67	5356.2		1478.22	784.042	7333.09	1049.21	678.302
2015			1.	Peptic ulcer disease		1764.8	1692.41	1999.75		1168.28	596.523		89.4508	63.2274	1339.92	161.977	110.222
2015			2.	Cirrhosis of the liver		3601.98	3393.54	4159.93		1973.39	1628.59		545.345	280.72	2222.76	353.7	199.451
2015		J.	Genitourinary diseases			3624.6	3504.38	3912.43		2320.16	1304.43		226.188	162.499	2389.73	495.506	350.669
2015			1.	Nephritis and nephrosis		2137.65	2042.86	2367.11		1262.96	874.684		177.025	150.649	1274.16	308.815	227.001
2015			2.	Benign prostatic hypertrophy		774.72	778.899	768.879		774.72	0		0	0	661.177	71.6688	41.8736
2015		K.	Skin diseases			961.179	959.269	964.829		522.215	438.965		159.56	150.084	567.46	48.7447	35.3314
2015		L.	Musculoskeletal diseases			6916.61	6877.53	7098.12		3180.44	3736.17		85.7862	407.188	5434.28	703.765	285.595
2015			1.	Rheumatoid arthritis		1187.8	1184.87	1203.07		355.88	831.922		7.72855	121.924	922.923	92.9409	42.2857
2015			2.	Osteoarthritis		3075.65	3067.62	3123.69		1170.8	1904.85		0.0264356	2.1121	2513.88	441.895	117.74
2015		M.	Congenital anomalies			7880.82	7460.68	8494.97		3969.05	3911.77		7437.03	145.23	294.804	1.99056	1.7621
2015		N.	Oral conditions			2173.15	2181.35	2155.55		1068.29	1104.85		131.349	248.879	1306.31	381.199	105.41
2015	III.	Injuries				55986.7	59017.1	57672.5		32324	23662.8		5008.34	9329.7	38847.5	1677.08	1124.11
2015		A.	Unintentional injuries			44622.3	47043.3	45961.2		25451.8	19170.4		4822.18	8653.57	28715.6	1453.67	977.198
2015			1.	Road traffic accidents		13279	13242.8	10682.1		9560.73	3718.23		868.588	2229.57	9724.24	290.798	165.759
2015			2.	Poisonings		1907.43	1965.72	2033.27		1054.33	853.092		54.774	210.475	1342.39	238.3	61.4822
2015			3.	Falls		5430.82	5817.05	5954.1		3094.44	2336.38		778.689	1527.29	2540.46	251.4	332.987
2015			4.	Fires		6388.12	6581.27	6976.48		1934.58	4453.54		812.871	1029.08	4351.71	116.226	78.2345
2015			5.	Drownings		2244.4	2207.29	2539.83		1414.31	830.094		356.345	570.112	1214.15	59.0538	44.7441
2015			6.	Other unintentional injuries		15372.5	17229.2	17775.5		8393.43	6979.11		1950.91	3087.05	9542.69	497.892	293.991
2015		B.	Intentional injuries			11364.5	11973.8	11711.3		6872.14	4492.34		186.163	676.128	10131.9	223.413	146.914
2015			1.	Self-inflicted injuries		7396.83	7830	7659.64		3918.77	3478.06		0.0818342	349.025	6853.94	112.447	81.3394
2015			2.	Violence		2878.16	3164.84	2963.98		1971.03	907.133		110.191	286.997	2338.06	87.0056	55.9066
2015			3.	War		907.102	781.493	903.169		840.64	66.4622		50.649	21.0719	815.919	15.0525	4.40953
2030	Population (millions)					1974.42	1833.59	1765.21		981.501	992.917		167.71	345.655	1255.96	121.749	83.3466
2030		All Causes				389904	349164	459806		207399	182504		60538.1	21009.5	233947	42193.9	32215.7
2030	I.	Communicable, maternal, perinatal and nutritional conditions				104412	63724.3	153029		61320.4	43091.9		43605.4	4036.3	51983	2556.2	2231.41
2030		A.	Infectious and parasitic diseases			61557.7	34674.9	85700.9		39210.1	22347.6		11999.1	2472.11	44947.1	1269.05	870.361
2030			1.	Tuberculosis		2641.85	1244.23	6125.44		1545.17	1096.68		73.7496	99.5569	2168.13	223.396	77.0202
2030			2.	STDs excluding HIV		2340.23	1548.06	3465.45		908.796	1431.44		576.276	20.4604	1649.29	56.3291	37.8776
2030			3.	HIV/AIDS		38076.5	21223.5	38897.4		25880.5	12195.9		418.447	621.994	36489.9	508.817	37.309
2030			4.	Diarrhoeal diseases		6089.23	4085.77	12658.9		3611.06	2478.17		5231.27	170.434	484.976	72.2194	130.326
2030			5.	Childhood-cluster diseases		3487.33	1609.82	7420.99		2010.49	1476.85		3254.5	182.1	47.1082	2.15757	1.4702
2030				a.	Pertussis	1255.77	588.285	2664.67		722.753	533.015		1225.34	30.431	0	0	0
2030				d.	Measles	1443.08	652.605	3091.09		836.149	606.93		1312.01	130.284	0.787846	0	0
2030				e.	Tetanus	762.434	354.68	1613.26		437.645	324.789		699.509	17.1723	42.222	2.06092	1.46977
2030			6.	Meningitis		675.972	365.913	1385.22		403.801	272.171		237.546	140.719	237.14	27.5429	33.0242
2030			7.	Hepatitis B and C		370.749	215.469	686.119		279.934	90.8151		2.5627	5.1768	315.069	23.6777	24.2629
2030			8.	Malaria		326.609	168.114	677.583		185.927	140.682		123.87	59.3395	128.259	8.65596	6.48435
2030			9.	Tropical-cluster diseases		1477.97	847.64	2909.41		1136.81	341.159		75.5444	311.678	1063.12	20.3565	7.27197
2030			10.	Leprosy		45.9988	36.8607	62.6695		27.9927	18.0061		4.95052	8.69413	28.1893	1.84565	2.31919
2030			11.	Dengue		56.3431	28.8718	121.302		31.0409	25.3021		10.2848	34.702	8.82608	1.10968	1.42053
2030			12.	Japanese encephalitis		106.338	57.4827	208.58		62.8163	43.5217		27.6497	16.2538	58.9099	1.88248	1.64204
2030			13.	Trachoma		90.5727	54.7336	156.357		33.4451	57.1276		0.480636	0.209904	54.823	19.7607	15.2985
2030			14.	Intestinal nematode infections		281.857	176.497	489.598		165.202	116.655		41.1401	163.702	69.3042	4.66096	3.04945
2030		B.	Respiratory infections			11275.3	6169.9	21295.2		6479.72	4795.53		5536.29	1071.53	2214.11	1177.22	1276.11
2030		C.	Maternal conditions			3309.2	2703.41	7136.45		0	3309.2		0	96.2767	3212.92	0	0
2030		D.	Perinatal conditions			23580.6	17158.8	31187.1		13134.3	10446.3		23580.6	0	0	0	0
2030		E.	Nutritional deficiencies			4689.42	3017.23	7709.71		2496.22	2193.2		2489.33	396.392	1608.84	109.921	84.9422
2030			1.	Protein-energy malnutrition		2180.76	1412.65	3538.03		1203.53	977.23		1877.1	213.786	83.2384	3.96924	2.65806
2030			2.	Iodine deficiency		217.654	140.742	345.778		119.72	97.9333		170.241	47.1869	0.216394	0.0046604	0.0048696
2030			3.	Vitamin A deficiency		43.505	22.3641	84.8244		24.7033	18.8017		18.9261	24.3772	0.200785	0	0.000882287
2030			4.	Iron-deficiency anaemia		1999.65	1309.76	3284.7		1021.96	977.693		331.563	94.7828	1450.88	86.1905	36.2336
2030	II.	Noncommunicable diseases				225929	218319	245072		110680	115250		12268.6	8794.57	139416	37186.9	28263
2030		A.	Malignant neoplasms			20309.5	18240.2	21331		9588.64	10720.9		582.329	670.168	10526.8	5278.77	3251.43
2030			1.	Mouth and oropharynx cancers		2717.25	2404.6	2869.25		1715.67	1001.58		11.658	16.8087	1334.23	872.219	482.33
2030			2.	Oesophagus cancer		1515.02	1340.45	1587.3		755.902	759.114		2.44961	4.21219	717.934	506.088	284.332
2030			3.	Stomach cancer		821.109	731.024	861.315		485.833	335.276		0.722514	3.19615	418.282	236.993	161.916
2030			4.	Colon and rectum cancers		688.854	598.893	726.228		384.512	304.342		0.421915	3.88168	378.432	168.089	138.03
2030			5.	Liver cancer		610.641	540.755	655.21		346.035	264.606		17.0269	15.787	390.165	117.721	69.941
2030			6.	Pancreas cancer		227.055	196.766	240.597		123.194	103.86		0.000104555	0.000552925	112.732	67.2743	47.0475
2030			7.	Trachea, bronchus, lung cancers		3177.7	3077.75	3437.61		2570.93	606.772		0	0.00058282	1672.09	1026.03	479.581
2030			8.	Melanoma and other skin cancers		57.8575	50.041	61.1847		26.6393	31.2182		1.9567	3.92713	27.9852	13.5806	10.4078
2030			9.	Breast cancer		1873.33	1602.91	1992.67		0.0348538	1873.3		0.102826	0.297791	1166.8	442.292	263.84
2030			10.	Cervix uteri cancer		2023.52	1742.34	2148.35		0	2023.52		0.0236749	0.81626	1226.27	549.968	246.444
2030			11.	Corpus uteri cancer		181.049	182.362	138.091		0	181.049		22.5579	48.3799	53.8139	29.9556	26.3419
2030			12.	Ovary cancer		495.206	408.077	527.199		0	495.206		1.61465	14.3002	270.655	120.625	88.0118
2030			13.	Prostate cancer		250.664	227.021	241.429		250.664	0		0.138552	0.321008	30.5802	91.7311	127.893
2030			14.	Bladder cancer		540.961	486.944	552.88		220.675	320.287		26.7107	8.83126	213.482	147.254	144.684
2030			15.	Lymphomas, multiple myeloma		1967.25	1734.63	2053.89		721.372	1245.88		103.036	220.886	1007.92	355.163	280.24
2030			16.	Leukaemia		1208.13	1116.2	1235.41		662.93	545.205		195.232	224.544	657.099	76.211	55.0474
2030		B.	Other neoplasms			512.221	461.693	535.175		264.282	247.939		48.3811	51.3868	325.235	45.7617	41.4558
2030		C.	Diabetes mellitus			6691.67	6025.56	7335.83		3382.16	3309.51		50.9754	66.5163	4366.4	1315.86	891.916
2030		D.	Endocrine disorders			549.782	480.466	663.008		285.872	263.91		165.655	31.037	250.148	58.2449	44.6976
2030		E.	Neuropsychiatric conditions			59598.9	59869.3	59468.5		25973.3	33625.6		2276.17	4838.95	47499.6	2411.5	2572.69
2030			1.	Unipolar depressive disorders		29285.7	29587.5	28821.3		10876.5	18409.1		0	1985.33	25781.5	1270.57	248.295
2030			2.	Bipolar disorder		3982.66	3945.57	4098.2		2038.84	1943.82		0.0383264	205.46	3774.47	2.47834	0.218731
2030			3.	Schizophrenia		5070.76	5040.5	5178.67		2424.23	2646.52		0.303748	351.251	4649.35	43.608	26.2416
2030			4.	Epilepsy		1900.53	1752.23	2162.74		943.309	957.216		276.481	468.371	1083.68	41.9235	30.0728
2030			5.	Alcohol use disorders		2184.07	2201.09	2176.72		2101.45	82.6218		0	28.6726	2086.62	56.6555	12.1221
2030			6.	Alzheimer and other dementias		2410.86	2516.34	2271.72		906.826	1504.03		97.5363	49.9522	235.452	400.189	1627.73
2030			7.	Parkinson disease		353.859	349.552	358.806		159.024	194.835		0.275897	0.0996203	184.743	69.1598	99.58
2030			8.	Multiple sclerosis		416.888	419.421	413.116		187.928	228.96		0.524283	40.3574	366.891	6.56641	2.54837
2030			9.	Drug use disorders		1588.19	1582.11	1653.82		1372.63	215.566		0	50.1585	1525.4	9.8938	2.74251
2030			10.	Post-traumatic stress disorder		1162.96	1173.29	1146.33		303.845	859.119		0	18.6895	1137.88	4.02136	2.37589
2030			11.	Obsessive-compulsive disorder		1317.4	1322.73	1314.59		535.358	782.04		0	26.3931	1269.48	17.1671	4.36053
2030			12.	Panic disorder		2090.74	2091.41	2101.58		711.406	1379.33		0	61.8479	2016.95	7.68652	4.24919
2030			13.	Insomnia (primary)		1500.66	1518.85	1473.43		680.537	820.123		0	22.7778	1318.46	122.463	36.9579
2030			14.	Migraine		2107.21	2104.27	2128.19		616.362	1490.85		81.9576	1288.74	736.31	0.186788	0.0143868
2030		F.	Sense organ diseases			27878.9	31247.2	30627.3		12334.4	15544.5		4.95196	13.6857	20517.4	5079.33	2263.55
2030			1.	Glaucoma		321.998	328.075	312.552		122.338	199.66		3.19439	7.69392	203.308	71.7357	36.0658
2030			2.	Cataracts		12628.5	15829.9	15110.1		5403.37	7225.13		0.295044	4.12537	8755.77	2500.11	1368.19
2030			3.	Vision disorders, age-related		2456.2	2633.55	2506.07		970.344	1485.86		0.00208581	0.733668	1617.27	568.168	270.029
2030			4.	Hearing loss, adult onset		12456.9	12441.5	12681.3		5831.53	6625.32		0	0	9933.31	1937.92	585.618
2030		G.	Cardiovascular diseases			54954.6	51115.7	61679.6		28572.6	26382		1029.65	430.758	23856.2	15322.2	14315.8
2030			1.	Rheumatic heart disease		2435.85	2169.1	3016.52		1258.33	1177.52		263.549	92.164	1483.65	318.825	277.663
2030			2.	Hypertensive heart disease		1640.37	1528.23	1856.74		866.226	774.148		20.9752	18.2932	730.539	427.493	443.073
2030			3.	Ischaemic heart disease		27900.5	25875.8	31398.7		15282.3	12618.2		95.4659	114.752	13023.5	8020.72	6646.08
2030			4.	Cerebrovascular disease		14773.7	13901.8	15830.3		7284.1	7489.58		142.4	53.5844	4720.72	5017.4	4839.58
2030			5.	Inflammatory heart diseases		1610.39	1472.01	1941.23		886.427	723.966		123.695	29.9328	881.714	273.096	301.954
2030		H.	Respiratory diseases			23164.7	20900.9	26434.7		13242.4	9922.35		816.717	1274.65	13886.7	4222.64	2963.97
2030			1.	Chronic obstructive pulmonary disease		14700.7	13185.8	17121.9		8533.67	6167.01		3.14886	0.586043	8673.67	3597.38	2425.9
2030			2.	Asthma		5160.35	4870.91	5507.83		2806.27	2354.08		333.635	1091.11	3539.55	124.046	72.0045
2030		I.	Digestive diseases			9787.83	8471.69	12903.6		5630.62	4157.2		839.726	402.123	6590.74	1158.17	797.066
2030			1.	Peptic ulcer disease		1655.69	1496.74	2086.38		1146.63	509.054		52.5503	33.065	1251.57	185.554	132.953
2030			2.	Cirrhosis of the liver		3080.72	2662.38	4079.78		1879.51	1201.22		327.046	150.76	2001.15	373.069	228.701
2030		J.	Genitourinary diseases			4007.04	3798.97	4471.52		2664.28	1342.76		140.248	98.1454	2625.94	657.515	485.194
2030			1.	Nephritis and nephrosis		2233.06	2070.14	2597.59		1349.45	883.618		109.611	90.9667	1311.3	407.694	313.493
2030			2.	Benign prostatic hypertrophy		996.644	1019.83	970.109		996.644	0		0	0	845.578	95.7129	55.3529
2030		K.	Skin diseases			1087.07	1090.89	1082.19		575.37	511.699		144.439	149.403	673.319	68.8497	51.0581
2030		L.	Musculoskeletal diseases			8370.72	8316.83	8633.03		3638.29	4732.43		72.4412	406.636	6461.73	1007.56	422.358
2030			1.	Rheumatoid arthritis		1435.7	1434.65	1452.71		413.324	1022.37		7.01765	120.474	1111.06	134.581	62.5649
2030			2.	Osteoarthritis		3909.15	3905.61	3972.93		1421.74	2487.41		0.0164746	2.08284	3097.32	636.552	173.178
2030		M.	Congenital anomalies			6335.37	5570.65	7300.5		3259.6	3075.77		5973.51	108.797	248.056	2.59368	2.41112
2030		N.	Oral conditions			2681.03	2729.19	2605.79		1267.89	1413.15		123.392	252.304	1587.97	557.95	159.416
2030	III.	Injuries				59562.2	67120.3	61704.4		35399.3	24162.8		4664.16	8178.61	42547.3	2450.82	1721.26
2030		A.	Unintentional injuries			47583.5	54255.8	49044.7		28076.2	19507.3		4488.72	7603.97	31854.9	2128.97	1506.92
2030			1.	Road traffic accidents		18563	20155.9	12881		13368.8	5194.18		1072.12	2589.61	14133	483.965	284.343
2030			2.	Poisonings		1972.91	2017.11	2253.93		1046.44	926.473		47.9001	164.427	1323.42	343.933	93.232
2030			3.	Falls		5294.82	6220.2	6214.65		2995.89	2298.93		684.618	1239.98	2519.08	353.992	497.143
2030			4.	Fires		5929.18	6222.97	7001.98		1821.49	4107.7		698.808	843.936	4094.46	170.332	121.649
2030			5.	Drownings		1940.57	1820.58	2434.15		1239.75	700.818		313.059	418.283	1060.63	81.6647	66.9377
2030			6.	Other unintentional injuries		13883	17819	18258.9		7603.83	6279.2		1672.21	2347.73	8724.39	695.086	443.614
2030		B.	Intentional injuries			11978.6	12864.5	12659.8		7323.1	4655.54		175.44	574.645	10692.4	321.844	214.346
2030			1.	Self-inflicted injuries		7590.73	8298.15	8104.79		4077.12	3513.61		0.100559	291.622	7020.68	159.567	118.759
2030			2.	Violence		3006.2	3519.52	3194.41		1999.58	1006.63		103.42	242.709	2449.92	128.607	81.552
2030			3.	War		1189.89	826.851	1164.07		1098.61	91.285		47.7555	24.03	1090.44	21.1144	6.55309

## Sheet: Sub-Saharan Africa
DALYs by cause, scenario, sex and age for the years 2002, 2015 and 2030
Source: Mathers CD, Loncar D (2006). Projections of global mortality and burden of disease from 2002 to 2030.
Sub-Saharan Africa
						Total DALYs ('000)				Baseline DALYs ('000)			Baseline projections ('000) by age group
Year		Cause				Baseline	Optimistic	Pessimistic		Male	Female		0-4	5-14	15-59	60-69	70+
2002	Population (millions)					683.33	683.33	683.33		339.224	344.106		115.416	185.984	349.695	20.4622	11.7733
2002		All Causes				372773	372773	372773		187241	185532		174475	34002.6	147685	10171.1	6438.8
2002	I.	Communicable, maternal, perinatal and nutritional conditions				272502	272502	272502		130346	142157		160636	20463.4	87819	2516.11	1068.18
2002		A.	Infectious and parasitic diseases			189893	189893	189893		92227.7	97665.1		102421	13723.6	70997.7	2008.19	742.66
2002			1.	Tuberculosis		9951.08	9951.08	9951.08		6486.73	3464.35		947.151	687.864	7877.97	338.71	99.3876
2002			2.	STDs excluding HIV		4219.68	4219.68	4219.68		1735.53	2484.15		1374.68	37.9813	2755.06	43.2403	8.71545
2002			3.	HIV/AIDS		63403.1	63403.1	63403.1		28139.8	35263.2		10388.2	4198.1	48329.7	461.795	25.2305
2002			4.	Diarrhoeal diseases		26358.5	26358.5	26358.5		13497.8	12860.7		25083.5	372.911	641.517	122.254	138.314
2002			5.	Childhood-cluster diseases		20411.1	20411.1	20411.1		10190.1	10221		19005.8	1324.77	76.8308	2.52957	1.12007
2002				a.	Pertussis	5708.92	5708.92	5708.92		2846.83	2862.1		5677.44	31.4822	0	0	0
2002				d.	Measles	11536.6	11536.6	11536.6		5761.01	5775.64		10329.5	1205.84	1.33589	0	0
2002				e.	Tetanus	3099.37	3099.37	3099.37		1545.41	1553.96		2932.8	87.4231	75.489	2.52957	1.12007
2002			6.	Meningitis		1081.69	1081.69	1081.69		526.739	554.954		571.155	298.135	201.354	8.27832	2.77026
2002			7.	Hepatitis B and C		830.547	830.547	830.547		466.153	364.394		264.578	214.335	326.716	21.0037	3.91466
2002			8.	Malaria		31614.1	31614.1	31614.1		15697.6	15916.4		29362.1	696.539	1380.19	106.407	68.8649
2002			9.	Tropical-cluster diseases		6260.69	6260.69	6260.69		4195.52	2065.16		276.658	1929.85	3857.67	142.169	54.3313
2002			10.	Leprosy		22.7964	22.7964	22.7964		13.4784	9.31808		0.393308	5.32881	14.0618	2.04152	0.970995
2002			11.	Dengue		5.28352	5.28352	5.28352		1.99235	3.29117		0.898826	3.91726	0.407658	0.03298	0.0268014
2002			12.	Japanese encephalitis		0	0	0		0	0		0	0	0	0	0
2002			13.	Trachoma		1307.37	1307.37	1307.37		332.877	974.49		1.1921	4.45254	869.894	268.262	163.567
2002			14.	Intestinal nematode infections		1406.25	1406.25	1406.25		700.708	705.539		184.3	1014.49	193.028	10.2871	4.14549
2002		B.	Respiratory infections			37869.8	37869.8	37869.8		20244	17625.9		27747.1	5696.03	3750.52	402.933	273.221
2002		C.	Maternal conditions			12052	12052	12052		0	12052		0	99.8965	11952.1	0	0
2002		D.	Perinatal conditions			22784.9	22784.9	22784.9		12910.7	9874.12		22784.9	0	0	0	0
2002		E.	Nutritional deficiencies			9902.95	9902.95	9902.95		4963.23	4939.72		7682.96	943.947	1118.75	104.988	52.2998
			1.	Protein-energy malnutrition		5972.03	5972.03	5972.03		3091.26	2880.77		5617.76	124.619	112.847	76.0043	40.7964
			2.	Iodine deficiency		1133.76	1133.76	1133.76		584.413	549.346		864.218	263.92	4.63631	0.738606	0.24625
			3.	Vitamin A deficiency		608.081	608.081	608.081		273.394	334.687		494.949	70.5548	36.0724	4.89331	1.61186
			4.	Iron-deficiency anaemia		2134.49	2134.49	2134.49		987.495	1147		659.714	480.837	962.031	22.6179	9.29237
2002	II.	Noncommunicable diseases				67786.3	67786.3	67786.3		33678.7	34107.5		9437.83	5122.11	40818.2	7206.47	5201.61
2002		A.	Malignant neoplasms			5064.07	5064.07	5064.07		2503.16	2560.91		121.895	227.588	3027.74	1014.81	672.042
2002			1.	Mouth and oropharynx cancers		223.274	223.274	223.274		154.703	68.5716		1.54704	3.12019	136.28	52.2611	30.0661
2002			2.	Oesophagus cancer		260.417	260.417	260.417		164.266	96.1503		0.0970614	0.191112	158.068	66.1998	35.8607
2002			3.	Stomach cancer		378.456	378.456	378.456		203.219	175.237		0.886324	4.49303	237.949	81.1656	53.9624
2002			4.	Colon and rectum cancers		231.565	231.565	231.565		127.744	103.821		0.169519	1.85097	151.662	44.123	33.7598
2002			5.	Liver cancer		640.178	640.178	640.178		434.406	205.772		6.41812	5.68974	467.348	107.171	53.5517
2002			6.	Pancreas cancer		88.998	88.998	88.998		40.3465	48.6515		0.0099996	0.161574	56.6007	20.9677	11.2581
2002			7.	Trachea, bronchus, lung cancers		174.292	174.292	174.292		126.419	47.8729		0.410589	1.83286	106.891	46.4626	18.6952
2002			8.	Melanoma and other skin cancers		89.033	89.033	89.033		42.6404	46.3926		0.231429	0.79364	49.1927	22.3916	16.4236
2002			9.	Breast cancer		453.413	453.413	453.413		0.507098	452.906		0.224898	1.66211	312.05	87.7425	51.7326
2002			10.	Cervix uteri cancer		491.746	491.746	491.746		0	491.746		0.00830024	0.599075	326.067	106.423	58.6487
2002			11.	Corpus uteri cancer		30.7458	30.7458	30.7458		0	30.7458		0.0635581	0.215705	16.9464	7.00957	6.51059
2002			12.	Ovary cancer		124.467	124.467	124.467		0	124.467		0.188553	3.52656	85.9787	22.1725	12.6004
2002			13.	Prostate cancer		269.51	269.51	269.51		269.51	0		0.212832	0.582276	50.1114	102.118	116.486
2002			14.	Bladder cancer		96.3175	96.3175	96.3175		63.2413	33.0762		0.576146	0.594365	45.2157	27.6457	22.2856
2002			15.	Lymphomas, multiple myeloma		594.428	594.428	594.428		369.553	224.875		39.0794	129.185	320.951	62.0822	43.1302
2002			16.	Leukaemia		229.218	229.218	229.218		122.765	106.453		15.3304	30.2528	143.298	23.43	16.9068
2002		B.	Other neoplasms			180.933	180.933	180.933		96.1354	84.7973		24.125	38.1258	89.7855	18.2933	10.6031
2002		C.	Diabetes mellitus			1190.97	1190.97	1190.97		478.712	712.263		7.41157	20.3059	750.844	255.905	156.508
2002		D.	Endocrine disorders			1413.03	1413.03	1413.03		640.862	772.166		511.291	87.1338	636.366	111.385	66.8524
2002		E.	Neuropsychiatric conditions			18195.7	18195.7	18195.7		9140.2	9055.52		2664.16	2235.64	12743.8	325.513	226.572
2002			1.	Unipolar depressive disorders		4374.01	4374.01	4374.01		1715.63	2658.38		0	701.109	3546.89	108.562	17.4476
2002			2.	Bipolar disorder		1747.66	1747.66	1747.66		896.319	851.338		0	90.983	1656.12	0.558584	0
2002			3.	Schizophrenia		1692.97	1692.97	1692.97		834.782	858.192		0	53.0511	1636.88	2.18899	0.84996
2002			4.	Epilepsy		1610.03	1610.03	1610.03		900.307	709.718		228.158	397.216	929.662	37.1763	17.8137
2002			5.	Alcohol use disorders		914.67	914.67	914.67		813.214	101.456		0	22.6663	871.584	14.1495	6.27001
2002			6.	Alzheimer and other dementias		345.772	345.772	345.772		158.523	187.249		66.5298	24.1738	61.2867	63.7555	130.026
2002			7.	Parkinson disease		76.344	76.344	76.344		41.3228	35.0212		0.0994763	0.017579	37.4788	19.9665	18.7817
2002			8.	Multiple sclerosis		103.014	103.014	103.014		39.0277	63.9867		0	16.7704	85.0063	0.986409	0.251232
2002			9.	Drug use disorders		1349.6	1349.6	1349.6		1016.2	333.396		0	28.3298	1319.08	2.03504	0.156144
2002			10.	Post-traumatic stress disorder		324.751	324.751	324.751		89.2054	235.545		0	9.80163	314.053	0.561031	0.335176
2002			11.	Obsessive-compulsive disorder		863.921	863.921	863.921		365.327	498.594		0	346.688	508.747	7.17316	1.31289
2002			12.	Panic disorder		794.381	794.381	794.381		265.675	528.705		0	36.1961	756.147	1.37208	0.666114
2002			13.	Insomnia (primary)		305.322	305.322	305.322		182.305	123.016		0	8.75455	277.215	15.8309	3.52148
2002			14.	Migraine		453.108	453.108	453.108		123.187	329.921		34.0594	229.742	189.27	0.0359953	0.00103072
2002		F.	Sense organ diseases			9024.48	9024.48	9024.48		4138.29	4886.19		24.5589	133.508	7346.94	1041.21	478.269
2002			1.	Glaucoma		941.435	941.435	941.435		430.965	510.469		4.48696	18.9856	764.155	102.559	51.2481
2002			2.	Cataracts		5202.81	5202.81	5202.81		2311.99	2890.83		17.9949	106.882	4110.28	649.744	317.914
2002			3.	Vision disorders, age-related		885.258	885.258	885.258		390.406	494.852		1.89767	7.52807	712.208	111.53	52.0931
2002			4.	Hearing loss, adult onset		1993.93	1993.93	1993.93		1004.36	989.566		0	0	1760.2	177.172	56.5566
2002		G.	Cardiovascular diseases			11743.8	11743.8	11743.8		5444.39	6299.37		328.814	331.163	6187.3	2565.79	2330.7
2002			1.	Rheumatic heart disease		517.061	517.061	517.061		183.777	333.284		34.3811	107.07	348.029	17.342	10.2401
2002			2.	Hypertensive heart disease		685.389	685.389	685.389		261.938	423.451		2.68368	4.5764	340.307	170.21	167.612
2002			3.	Ischaemic heart disease		3332.44	3332.44	3332.44		1812.54	1519.9		4.30922	48.2131	1537.18	987.077	755.655
2002			4.	Cerebrovascular disease		3865.26	3865.26	3865.26		1648.36	2216.9		24.8009	63.4463	1982.97	973.108	820.935
2002			5.	Inflammatory heart diseases		910.804	910.804	910.804		483.869	426.935		141.195	51.4297	558.562	89.8756	69.7427
2002		H.	Respiratory diseases			5684.87	5684.87	5684.87		3300.76	2384.11		1018.04	917.923	2658.18	609.889	480.834
2002			1.	Chronic obstructive pulmonary disease		1243.29	1243.29	1243.29		836.412	406.876		29.3112	9.13265	610.863	319.647	274.334
2002			2.	Asthma		2295.8	2295.8	2295.8		1273.07	1022.73		426.674	774.388	992.725	62.5408	39.4775
2002		I.	Digestive diseases			5433.19	5433.19	5433.19		2965.17	2468.02		497.707	442.614	3519.01	609.098	364.754
2002			1.	Peptic ulcer disease		338.569	338.569	338.569		198.437	140.131		0.942207	9.14429	271.185	33.7344	23.5624
2002			2.	Cirrhosis of the liver		1068.18	1068.18	1068.18		673.156	395.022		10.6077	17.4176	779.356	175.943	84.854
2002		J.	Genitourinary diseases			2210.48	2210.48	2210.48		1122.86	1087.62		216.729	178.328	1292.1	288.798	234.526
2002			1.	Nephritis and nephrosis		1402.63	1402.63	1402.63		658.118	744.508		167.527	154.279	674.955	223.697	182.168
2002			2.	Benign prostatic hypertrophy		243.247	243.247	243.247		243.247	0		0	0	224.98	9.58712	8.68009
2002		K.	Skin diseases			871.864	871.864	871.864		461.888	409.976		97.0559	88.5468	534.852	76.2662	75.1428
2002		L.	Musculoskeletal diseases			2255.1	2255.1	2255.1		1024.08	1231.02		35.3596	182.036	1732.91	211.41	93.384
2002			1.	Rheumatoid arthritis		279.978	279.978	279.978		107.855	172.123		5.1216	25.7069	214.727	23.069	11.354
2002			2.	Osteoarthritis		1248.33	1248.33	1248.33		507.344	740.988		0	3.1403	1025.12	157.723	62.3535
2002		M.	Congenital anomalies			3927.35	3927.35	3927.35		2077.95	1849.4		3771.78	101.643	52.7649	0.545838	0.621013
2002		N.	Oral conditions			590.454	590.454	590.454		284.273	306.18		118.911	137.555	245.624	77.5637	10.8002
2002	III.	Injuries				32484	32484	32484		23216.7	9267.23		4401.51	8417.05	19047.8	448.546	169.009
2002		A.	Unintentional injuries			22199.5	22199.5	22199.5		14726.9	7472.6		4142.93	7455.9	10166.8	308.578	125.308
2002			1.	Road traffic accidents		7480.98	7480.98	7480.98		4907.29	2573.68		831.249	3078.04	3419.24	114.981	37.4689
2002			2.	Poisonings		1066.06	1066.06	1066.06		680.436	385.623		230.947	244.661	557.653	26.2747	6.52412
2002			3.	Falls		1115.23	1115.23	1115.23		718.491	396.74		170.772	498.972	388.484	31.1072	25.8963
2002			4.	Fires		2053.78	2053.78	2053.78		1266.34	787.441		889.103	825.639	316.252	13.5415	9.24001
2002			5.	Drownings		1960.04	1960.04	1960.04		1471.78	488.254		388.278	549.783	1003.43	18.1293	0.419277
2002			6.	Other unintentional injuries		8523.45	8523.45	8523.45		5682.6	2840.85		1632.58	2258.81	4481.75	104.544	45.7594
2002		B.	Intentional injuries			10284.4	10284.4	10284.4		8489.81	1794.63		258.582	961.147	8881.04	139.968	43.7012
2002			1.	Self-inflicted injuries		951.917	951.917	951.917		712.746	239.171		0.0440377	89.2878	826.531	25.4887	10.5654
2002			2.	Violence		5737.27	5737.27	5737.27		4605.88	1131.38		217.706	636.898	4815.01	50.9846	16.6707
2002			3.	War		3591.76	3591.76	3591.76		3168.37	423.392		39.9087	234.214	3237.82	63.3879	16.4323
2015	Population (millions)					916.858	784.413	767.35		455.282	461.576		139.991	237.086	496.616	26.5733	16.5918
2015		All Causes				411858	350153	457854		209916	201942		164098	35685.5	190164	13030.1	8880.55
2015	I.	Communicable, maternal, perinatal and nutritional conditions				278351	218643	322440		133343	145008		148247	18610.2	107329	2922.14	1243.33
2015		A.	Infectious and parasitic diseases			195256	152654	226025		94456	100799		88694.2	12622.7	90639.6	2414.28	884.78
2015			1.	Tuberculosis		10362.4	7944.55	12137.6		6681.76	3680.63		853.463	658.606	8429.93	318.243	102.145
2015			2.	STDs excluding HIV		4560.15	3545.07	5424.99		1813.27	2746.87		1265.4	39.565	3204.61	41.2487	9.32244
2015			3.	HIV/AIDS		74700.3	64490.5	81354.8		32623.9	42076.4		2786.82	4324.37	66575	926.51	87.6015
2015			4.	Diarrhoeal diseases		24933.3	18734	29615.4		12894.9	12038.4		23573.1	369.601	706.844	120.597	163.125
2015			5.	Childhood-cluster diseases		18987.7	13614.1	22485.9		9593.62	9394.12		17736.2	1165.19	82.5363	2.55133	1.29007
2015				a.	Pertussis	5323.03	3874.81	6282.28		2683.33	2639.7		5291.55	31.4822	0	0	0
2015				d.	Measles	10670.9	7583.59	12662		5396.3	5274.64		9613.35	1056.26	1.33589	0	0
2015				e.	Tetanus	2939.94	2115.01	3478.93		1483.14	1456.8		2777.47	77.4274	81.1943	2.55133	1.29007
2015			6.	Meningitis		993.526	689.45	1246.38		492.36	501.166		521.747	255.159	205.469	8.03902	3.11225
2015			7.	Hepatitis B and C		786.055	549.318	994.05		450.106	335.949		241.532	182.305	338.17	19.7882	4.25986
2015			8.	Malaria		29216.2	21184.4	34833		14703.3	14512.9		27002.4	594.202	1437.02	103.986	78.5297
2015			9.	Tropical-cluster diseases		6100.56	4229.64	7747.33		4189.3	1911.26		252.973	1612.69	4034.23	140.424	60.2428
2015			10.	Leprosy		18.5937	16.3309	20.2305		11.4125	7.18115		0.244224	3.49753	11.9109	1.91635	1.02467
2015			11.	Dengue		4.56592	3.01307	6.08084		1.75776	2.80816		0.824447	3.27461	0.40435	0.0312004	0.0313179
2015			12.	Japanese encephalitis		0	0	0		0	0		0	0	0	0	0
2015			13.	Trachoma		1306.84	934.145	1615.65		354.258	952.578		1.10166	3.61195	859.003	262.166	180.954
2015			14.	Intestinal nematode infections		1354.51	992.455	1638.31		688.695	665.814		183.234	946.924	209.157	10.3534	4.8405
2015		B.	Respiratory infections			35735.8	26033.2	43126.4		19259.3	16476.5		25878.9	5025.44	4119.49	408.982	302.931
2015		C.	Maternal conditions			11456.6	7553.14	15203.5		0	11456.6		0	99.8962	11356.7	0	0
2015		D.	Perinatal conditions			26335.3	25033.5	26789.2		14792.5	11542.8		26335.3	0	0	0	0
2015		E.	Nutritional deficiencies			9568.28	7369.15	11295.8		4835.24	4733.04		7338.37	862.191	1213.2	98.8812	55.6244
2015			1.	Protein-energy malnutrition		5707.43	4432.74	6677.2		2971.08	2736.35		5370.96	109.255	114.117	70.1719	42.9258
2015			2.	Iodine deficiency		1088.42	884.022	1280.1		563.259	525.166		850.577	232.375	4.57434	0.645021	0.252453
2015			3.	Vitamin A deficiency		563.555	400.748	684.562		256.037	307.518		456.995	63.8784	36.6794	4.37363	1.62869
2015			4.	Iron-deficiency anaemia		2158.68	1616.19	2593.18		1020.41	1138.27		617.399	453.165	1054.68	23.0035	10.4331
2015	II.	Noncommunicable diseases				89065.6	86444.5	91162.7		44244.2	44821.4		10259.1	6145.49	55743.2	9519.62	7398.22
2015		A.	Malignant neoplasms			7283.37	7162.55	7289.66		3546.87	3736.5		172.738	310.71	4314.05	1437.23	1048.64
2015			1.	Mouth and oropharynx cancers		319.837	309.059	327.03		217.129	102.708		2.33474	4.41726	191.959	72.7528	48.3727
2015			2.	Oesophagus cancer		349.218	339.38	355.819		216.74	132.478		0.116002	0.186826	206.162	90.2906	52.4618
2015			3.	Stomach cancer		540.815	530.175	544.809		283.692	257.123		1.22698	6.21594	337.97	112.26	83.1425
2015			4.	Colon and rectum cancers		341.933	332.861	342.31		187.835	154.098		0.259245	2.65372	218.01	64.2453	56.7646
2015			5.	Liver cancer		923.056	895.983	950.429		619.85	303.206		9.19412	7.96522	677.476	146.692	81.7277
2015			6.	Pancreas cancer		126.969	124.593	125.91		55.3902	71.5792		0.0129221	0.161756	79.0851	29.625	18.0845
2015			7.	Trachea, bronchus, lung cancers		258.515	254.001	307.451		191.075	67.4405		0	0.00184669	154.315	71.7274	32.4703
2015			8.	Melanoma and other skin cancers		128.812	125.91	127.491		58.6235	70.1889		0.317457	0.974534	69.5981	32.627	25.2953
2015			9.	Breast cancer		663.531	661.14	635.299		0.626294	662.905		0.304576	2.2476	450.869	130.374	79.7366
2015			10.	Cervix uteri cancer		710.853	707.149	673.92		0	710.853		0.0121574	0.82324	463.362	157.193	89.4633
2015			11.	Corpus uteri cancer		45.0488	45.4532	42.3701		0	45.0488		0.103331	0.342271	24.6144	10.19	9.79878
2015			12.	Ovary cancer		192.918	190.065	177.143		0	192.918		0.271401	5.02506	130.718	36.0823	20.8208
2015			13.	Prostate cancer		381.782	375.398	394.081		381.782	0		0.293228	0.779296	65.8548	134.913	179.942
2015			14.	Bladder cancer		137.667	135.701	138.649		90.3363	47.3311		0.931589	0.856663	63.656	37.8061	34.417
2015			15.	Lymphomas, multiple myeloma		857.682	850.313	850.198		531.725	325.957		57.1968	181.555	462.438	86.418	70.0737
2015			16.	Leukaemia		322.421	319.113	318.114		171.103	151.318		21.649	39.6246	200.862	33.0038	27.2813
2015		B.	Other neoplasms			258.806	258.785	251.286		136.173	122.633		35.3283	52.5346	128.491	26.0886	16.3641
2015		C.	Diabetes mellitus			1939.73	1835.37	1976.24		727.328	1212.4		8.10972	22.4036	1278.77	383.434	247.011
2015		D.	Endocrine disorders			1660.68	1504.07	1767.64		748.51	912.173		513.835	93.9984	817.677	144.226	90.9459
2015		E.	Neuropsychiatric conditions			23902.2	23779.2	23967.1		12043.7	11858.5		2648.67	2759.61	17754.8	420.544	318.604
2015			1.	Unipolar depressive disorders		6116.52	6163.54	6045.47		2406.85	3709.67		0	893.744	5056.25	142.282	24.24
2015			2.	Bipolar disorder		2389.86	2365.81	2429.39		1231.3	1158.56		0	112.361	2276.8	0.70758	0
2015			3.	Schizophrenia		2338.67	2322.36	2365.08		1157.3	1181.36		0	65.7813	2268.9	2.82052	1.16136
2015			4.	Epilepsy		2003.94	1889.77	2104.58		1133.68	870.26		247.881	461.462	1223.95	46.5476	24.1066
2015			5.	Alcohol use disorders		1270.46	1271.07	1262.82		1134.81	135.65		0	28.2323	1216.22	17.7101	8.29885
2015			6.	Alzheimer and other dementias		461.268	467.388	454.995		209.351	251.917		78.8109	30.5419	82.691	82.9184	186.306
2015			7.	Parkinson disease		96.1997	95.781	96.1186		51.7656	44.4342		0.100284	0.0209687	44.9557	25.3223	25.8004
2015			8.	Multiple sclerosis		144.853	145.338	143.661		55.7003	89.1532		0	21.244	121.993	1.27901	0.337163
2015			9.	Drug use disorders		1879.4	1880.63	1871.21		1421.3	458.1		0	34.6889	1841.91	2.5924	0.210936
2015			10.	Post-traumatic stress disorder		457.988	460.609	453.76		126.838	331.151		0	12.5029	444.267	0.750954	0.467189
2015			11.	Obsessive-compulsive disorder		1171.03	1176.71	1164.9		505.259	665.766		0	439.951	719.904	9.35784	1.81274
2015			12.	Panic disorder		1094.21	1091.26	1099.56		368.554	725.657		0	45.5236	1046.01	1.77835	0.90423
2015			13.	Insomnia (primary)		433.718	436.588	428.962		260.624	173.094		0	11.2038	397.119	20.5244	4.8712
2015			14.	Migraine		590.11	590.695	591.981		158.652	431.458		40.6283	286.996	262.436	0.0478316	0.0013814
2015		F.	Sense organ diseases			12366.1	12622.8	12411.2		5679.52	6686.63		27.5022	154.252	10140.5	1371.15	672.744
2015			1.	Glaucoma		1309.83	1322.64	1290.63		601.253	708.575		5.39944	24.1268	1074.46	133.997	71.8499
2015			2.	Cataracts		7062.28	7301	7121.18		3132.78	3929.5		19.7005	120.659	5603.9	866.958	451.064
2015			3.	Vision disorders, age-related		1220.11	1237.53	1205.97		539.21	680.896		2.22533	9.33954	988.677	146.591	73.2735
2015			4.	Hearing loss, adult onset		2772.56	2760.27	2791.97		1405.54	1367.01		0	0	2473.35	223.326	75.879
2015		G.	Cardiovascular diseases			15595.7	14991.2	16287.1		7321.65	8274.03		410.524	335.315	8177.54	3358.79	3313.51
2015			1.	Rheumatic heart disease		650.746	576.067	694.562		233.919	416.828		45.2354	106.352	461.709	22.9592	14.4907
2015			2.	Hypertensive heart disease		913.086	887.631	948.595		353.729	559.357		3.0847	4.96851	441.308	223.928	239.797
2015			3.	Ischaemic heart disease		4457.76	4322.45	4683.45		2426.58	2031.19		4.91749	53.2011	2036	1294.75	1068.9
2015			4.	Cerebrovascular disease		5153.04	5011.76	5329.49		2213.83	2939.22		28.3502	66.9741	2629.38	1271.14	1157.2
2015			5.	Inflammatory heart diseases		1191.01	1118.41	1248.84		645.502	545.507		182.34	50.1596	741.421	117.28	99.8088
2015		H.	Respiratory diseases			7480.98	7164.51	7827.11		4395.92	3085.06		1169.63	1137.55	3678.25	814.768	680.79
2015			1.	Chronic obstructive pulmonary disease		1766.56	1690.41	1992.91		1206.83	559.735		32.6636	10.2521	883.853	441.627	398.165
2015			2.	Asthma		2986.74	2989.87	2968.31		1664.89	1321.84		511.013	973.861	1365.97	80.7805	55.1126
2015		I.	Digestive diseases			6550.53	5656.54	7001.16		3602.85	2947.67		589.502	479.375	4314.13	723.649	443.87
2015			1.	Peptic ulcer disease		412.188	357.141	445.792		244.713	167.475		1.07015	9.78203	331.767	40.0551	29.5141
2015			2.	Cirrhosis of the liver		1288.76	1124.34	1389.83		811.556	477.206		12.5437	18.8692	950.203	205.851	101.296
2015		J.	Genitourinary diseases			2667.21	2444.62	2823.65		1367.79	1299.42		212.606	172.737	1593.56	369.363	318.945
2015			1.	Nephritis and nephrosis		1679.38	1523.5	1790.44		784.493	894.886		164.136	149.147	832.7	286.541	246.855
2015			2.	Benign prostatic hypertrophy		313.564	317.174	307.243		313.564	0		0	0	289.199	11.929	12.4358
2015		K.	Skin diseases			1185.06	1183.99	1179.6		630.246	554.818		115.598	111.589	753.554	99.495	104.828
2015		L.	Musculoskeletal diseases			3054.47	3038.41	3072.75		1383.41	1671.06		42.6565	229.808	2386.44	269.257	126.309
2015			1.	Rheumatoid arthritis		382.373	381.937	383.081		148.305	234.067		6.0977	32.2024	299.059	29.628	15.3858
2015			2.	Osteoarthritis		1699.37	1695.17	1707.48		688.348	1011.02		0	3.91617	1410.07	201.191	84.1866
2015		M.	Congenital anomalies			4345.87	4016.36	4546.61		2290.05	2055.83		4168.24	110.244	65.8361	0.726962	0.826495
2015		N.	Oral conditions			774.88	786.183	761.6		370.201	404.679		144.215	175.36	339.573	100.903	14.8286
2015	III.	Injuries				44441.3	45066.2	44250.8		32329	12112.2		5592.06	10929.8	27092.1	588.339	238.995
2015		A.	Unintentional injuries			30476.2	31893.4	29930.6		20728.9	9747.35		5278.09	9708.95	14900.8	411.527	176.906
2015			1.	Road traffic accidents		11884.7	12652.3	10300.4		8050.17	3834.5		1192.74	4687.83	5788.69	160.621	54.7921
2015			2.	Poisonings		1417.42	1378.24	1451.75		923.725	493.698		289.11	296.714	788.045	34.5747	8.97866
2015			3.	Falls		1401.56	1482.35	1469.33		919.669	481.891		210.293	584.708	530.189	40.1293	36.2407
2015			4.	Fires		2535.37	2575.76	2618.18		1570.8	964.564		1095.06	988.59	421.33	17.5323	12.8541
2015			5.	Drownings		2515.41	2406.7	2615.64		1939.89	575.514		476.108	617.111	1398.24	23.268	0.679568
2015			6.	Other unintentional injuries		10721.8	11398	11475.3		7324.65	3397.18		2014.79	2534	5974.28	135.401	63.3613
2015		B.	Intentional injuries			13965	13172.8	14320.1		11600.1	2364.9		313.971	1220.8	12191.4	176.813	62.089
2015			1.	Self-inflicted injuries		1266.16	1260.17	1292.09		948.622	317.539		0.0516577	112.256	1107.25	32.0592	14.5454
2015			2.	Violence		7450.4	7362.7	7821.29		5983.21	1467.19		263.923	805.352	6292.99	64.8589	23.2677
2015			3.	War		5244.16	4545.44	5202.29		4664.84	579.318		48.9111	302.245	4789.03	79.7507	24.2278
2030	Population (millions)					1209.89	1109.39	1012.58		599.447	610.441		155.42	285.818	710.839	35.4828	22.3283
2030		All Causes				458026	341817	537565		237486	220540		139662	35627.6	254245	16988.7	11502.5
2030	I.	Communicable, maternal, perinatal and nutritional conditions				278910	161097	355262		133663	145247		123026	15024.7	135990	3567.92	1301.51
2030		A.	Infectious and parasitic diseases			204886	113547	255339		98296.2	106590		69521.9	10565.1	120800	3067.62	932.08
2030			1.	Tuberculosis		9477.69	4468.47	13979.5		6112.75	3364.94		608.186	516.298	7995.99	272.133	85.0874
2030			2.	STDs excluding HIV		4489.6	2699.3	6274.08		1814.12	2675.48		1025.3	36.0066	3378.96	39.5017	9.82975
2030			3.	HIV/AIDS		106341	63192.7	109315		46176.4	60164.3		2910.36	4547.89	97087.7	1677.7	117.087
2030			4.	Diarrhoeal diseases		19826.9	11074.9	28772.8		10543.2	9283.76		18442.3	324.838	767.783	117.841	174.131
2030			5.	Childhood-cluster diseases		14529.7	7109.59	21209.4		7546.04	6983.61		13632.3	814.892	78.56	2.49489	1.38046
2030				a.	Pertussis	4120.29	2063.98	5951.09		2135.01	1985.28		4088.81	31.4822	0	0	0
2030				d.	Measles	8048.46	3888.26	11806.6		4185.62	3862.84		7317.36	729.76	1.33589	0	0
2030				e.	Tetanus	2321.1	1136.74	3394.96		1201.81	1119.29		2186.38	53.6282	77.2189	2.49489	1.38046
2030			6.	Meningitis		796.535	368.318	1272.69		411.328	385.207		406.779	181.447	197.702	7.35663	3.25129
2030			7.	Hepatitis B and C		676.934	326.393	1086.39		407.639	269.296		184.863	131.827	337.478	18.4643	4.30179
2030			8.	Malaria		22611.7	11293.7	33185.7		11725.3	10886.4		20615.2	410.191	1400.99	101.454	83.8716
2030			9.	Tropical-cluster diseases		5469.56	2693.02	8743.85		3845.17	1624.39		195.85	1132.24	3940.44	137.484	63.5448
2030			10.	Leprosy		16.1037	11.9639	20.1937		10.9674	5.13629		0.126224	1.94584	11.3652	1.65632	1.01011
2030			11.	Dengue		3.34986	1.45494	5.90811		1.34993	1.99994		0.629736	2.26672	0.39133	0.0293353	0.0327396
2030			12.	Japanese encephalitis		0	0	0		0	0		0	0	0	0	0
2030			13.	Trachoma		1324.24	685.405	2020.37		387.25	936.994		0.86347	2.47967	881.925	248.205	190.771
2030			14.	Intestinal nematode infections		1134.11	618.483	1658.9		592.013	542.095		158.897	745.576	213.926	10.4565	5.25312
2030		B.	Respiratory infections			29061.4	14876.3	42918.4		15884.1	13177.3		20240.3	3676.74	4422.39	407.631	314.31
2030		C.	Maternal conditions			9632.74	4492.87	17265.8		0	9632.74		0	99.8954	9532.85	0	0
2030		D.	Perinatal conditions			27248.1	23462.5	28441.6		15307.2	11940.9		27248.1	0	0	0	0
2030		E.	Nutritional deficiencies			8081.72	4717.91	11297		4175.9	3905.82		6015.76	682.938	1235.24	92.6673	55.1194
2030			1.	Protein-energy malnutrition		4716.29	2788.63	6483.14		2509.75	2206.54		4405.2	83.0859	121.659	64.6697	41.6732
2030			2.	Iodine deficiency		926.405	597.871	1254.53		487.992	438.414		731.136	189.724	4.78492	0.531295	0.229107
2030			3.	Vitamin A deficiency		445.482	213.759	676.595		209.836	235.646		353.602	48.8308	37.7871	3.75717	1.5058
2030			4.	Iron-deficiency anaemia		1953.77	1099.04	2822.48		948.696	1005.07		492.915	358.666	1067.76	23.1031	11.3253
2030	II.	Noncommunicable diseases				118531	116026	123421		58700.9	59829.9		10128.1	6924.85	78995.1	12603.4	9879.4
2030		A.	Malignant neoplasms			11166.8	10988	11044.9		5270.34	5896.48		234.758	412.33	6887	2080.02	1552.71
2030			1.	Mouth and oropharynx cancers		485.514	466.674	497.708		322.649	162.865		3.40713	5.99572	301.561	103.504	71.0456
2030			2.	Oesophagus cancer		515.571	501.749	529.897		318.665	196.906		0.110017	0.197698	320.511	119.864	74.8879
2030			3.	Stomach cancer		849.395	833.183	844.394		428.951	420.444		1.63683	8.15277	554.926	163.037	121.643
2030			4.	Colon and rectum cancers		531.686	514.571	521.917		284.545	247.142		0.40111	3.76041	346.345	93.6608	87.5192
2030			5.	Liver cancer		1439.89	1384.03	1491.75		953.708	486.185		12.6252	10.8163	1083.49	213.092	119.868
2030			6.	Pancreas cancer		201.895	198.148	194.753		82.135	119.76		0.0148105	0.197587	132.042	42.5946	27.0462
2030			7.	Trachea, bronchus, lung cancers		395.613	388.072	569.669		298.232	97.3815		0	0.00184669	253.937	98.4871	43.1866
2030			8.	Melanoma and other skin cancers		199.712	193.742	192.599		85.8144	113.897		0.412826	1.19754	110.886	49.1213	38.0942
2030			9.	Breast cancer		1065.08	1058.43	975.702		0.69386	1064.39		0.404393	2.86015	735.49	200.726	125.603
2030			10.	Cervix uteri cancer		1132.88	1128.42	1021.1		0	1132.88		0.0159496	1.09739	759.51	235.346	136.91
2030			11.	Corpus uteri cancer		71.0763	72.6984	62.5424		0	71.0763		0.148277	0.511848	40.7648	14.8049	14.8464
2030			12.	Ovary cancer		319.592	311.447	275.815		0	319.592		0.379977	7.06201	219.814	58.0944	34.242
2030			13.	Prostate cancer		559.449	561.794	556.442		559.449	0		0.376934	0.977679	110.183	188.953	258.959
2030			14.	Bladder cancer		212.232	211.739	208.944		137.645	74.5866		1.54921	1.19918	106.066	53.5754	49.8418
2030			15.	Lymphomas, multiple myeloma		1252.07	1247.28	1212.34		770.504	481.568		80.3433	242.774	695.226	125.093	108.637
2030			16.	Leukaemia		464.333	462.23	446.913		237.802	226.531		28.6935	52.1652	294.104	47.4372	41.9332
2030		B.	Other neoplasms			376.478	380.622	352.944		192.208	184.27		49.2109	70.054	194.363	38.3598	24.4909
2030		C.	Diabetes mellitus			2680.36	2470.59	2774.42		1008.05	1672.32		8.04543	22.6923	1832.01	496.319	321.298
2030		D.	Endocrine disorders			1977.6	1704.09	2198.69		885.738	1091.86		455.202	91.2135	1124.88	188.788	117.514
2030		E.	Neuropsychiatric conditions			30725.1	31373.4	30426.5		15399.6	15325.5		2368.86	3200.12	24177.4	555.542	423.161
2030			1.	Unipolar depressive disorders		8578.45	8986.28	8285.18		3354.95	5223.5		0	1077.44	7277.58	190.65	32.7862
2030			2.	Bipolar disorder		3057.98	3093.21	3087.62		1559.19	1498.79		0	129.858	2927.21	0.910331	0
2030			3.	Schizophrenia		3043.18	3096.39	3046.03		1480.32	1562.87		0	76.8229	2961.29	3.55724	1.51215
2030			4.	Epilepsy		2406.55	2214.4	2615.27		1381.7	1024.85		240.873	493.325	1582.2	59.7329	30.4208
2030			5.	Alcohol use disorders		1763.86	1822.29	1727.52		1576.83	187.033		0	34.1138	1697.03	22.3509	10.3681
2030			6.	Alzheimer and other dementias		607.026	651.038	578.14		267.564	339.462		85.5808	36.3486	123.091	110.519	251.486
2030			7.	Parkinson disease		131.184	135.268	129.687		70.2837	60.9005		0.0971499	0.0215006	65.6187	32.7286	32.7182
2030			8.	Multiple sclerosis		199.561	207.235	193.836		76.3205	123.241		0	25.179	172.318	1.63611	0.427824
2030			9.	Drug use disorders		2478.57	2557.65	2421.48		1869.48	609.092		0	39.9396	2435.03	3.33373	0.268389
2030			10.	Post-traumatic stress disorder		640.607	668.048	619.754		176.126	464.481		0	15.0192	623.926	1.02073	0.640942
2030			11.	Obsessive-compulsive disorder		1525.34	1587.98	1481.09		665.166	860.172		0	525.954	984.498	12.4207	2.46621
2030			12.	Panic disorder		1426.06	1462.33	1405.54		473.985	952.073		0	53.8459	1368.67	2.34081	1.19965
2030			13.	Insomnia (primary)		622.689	651.168	603.523		371.821	250.868		0	13.5474	575.321	27.3883	6.43237
2030			14.	Migraine		728.827	751.427	717.576		192.805	536.022		43.6414	337.682	347.434	0.0665242	0.00181644
2030		F.	Sense organ diseases			17766.9	19497.6	18100.3		8140.62	9626.31		28.1946	166.762	14858.8	1811.15	902.013
2030			1.	Glaucoma		1955.07	2065.61	1889.27		898.67	1056.4		6.00974	29.0035	1642.2	180.168	97.6945
2030			2.	Cataracts		10008.4	11389.1	10403.2		4415.55	5592.8		19.6076	126.86	8108.8	1146.42	606.663
2030			3.	Vision disorders, age-related		1827.78	1965.51	1793.51		812.998	1014.78		2.41067	10.7781	1517.95	196.939	99.6973
2030			4.	Hearing loss, adult onset		3973.97	4075.7	4012.49		2012.5	1961.47		0	0	3589.71	287.223	97.0335
2030		G.	Cardiovascular diseases			21255.7	20351.9	22953		10017.9	11237.8		479.32	297.456	11716.7	4349.62	4412.57
2030			1.	Rheumatic heart disease		794.22	640.928	906.15		281.982	512.238		53.555	90.4922	600.281	30.4093	19.4826
2030			2.	Hypertensive heart disease		1249.13	1215.31	1337.18		486.51	762.624		3.60792	4.80916	628.575	288.181	323.961
2030			3.	Ischaemic heart disease		6199.92	6057.01	6722.92		3359.51	2840.41		5.70745	52.5749	3053.86	1679.47	1408.31
2030			4.	Cerebrovascular disease		7159.03	6994.37	7578.44		3072.15	4086.88		32.9865	61.7642	3873.22	1646.28	1544.77
2030			5.	Inflammatory heart diseases		1545.72	1395.46	1713.25		845.991	699.732		213.177	42.5297	1006.08	151.446	132.494
2030		H.	Respiratory diseases			9912.89	9370.05	10943.8		5940.38	3972.5		1221	1331.09	5362.74	1110.24	887.811
2030			1.	Chronic obstructive pulmonary disease		2647.29	2488.44	3383.38		1843.15	804.144		32.7962	10.84	1458.98	619.71	524.965
2030			2.	Asthma		3729.89	3837.64	3641.43		2086.99	1642.89		560.011	1161.15	1836.48	101.497	70.7465
2030		I.	Digestive diseases			7963.01	5955.43	9261.64		4452.06	3510.95		616.107	461.373	5506.28	873.199	506.046
2030			1.	Peptic ulcer disease		509.749	386.462	602.169		307.42	202.33		1.1076	9.3422	416.837	48.0221	34.4407
2030			2.	Cirrhosis of the liver		1633.96	1247.33	1929.31		1038.43	595.524		13.4331	18.3565	1243.03	245.74	113.398
2030		J.	Genitourinary diseases			3422.15	3087	3747.44		1804.39	1617.76		183.116	147.237	2206.25	480.009	405.541
2030			1.	Nephritis and nephrosis		2071.89	1823.83	2302.56		945.345	1126.55		141.443	125.911	1117.71	372.722	314.101
2030			2.	Benign prostatic hypertrophy		513.689	548.282	493.132		513.689	0		0	0	482.461	15.6702	15.5573
2030		K.	Skin diseases			1643.3	1688.95	1614.58		866.12	777.181		127.049	132.803	1106.39	135.347	141.715
2030		L.	Musculoskeletal diseases			4278.34	4393.86	4293.49		1936.14	2342.19		47.1654	272.934	3445.63	348.958	163.651
2030			1.	Rheumatoid arthritis		540.461	558.2	538.885		210.195	330.266		6.59182	37.7888	437.129	38.723	20.2287
2030			2.	Osteoarthritis		2440.89	2521.42	2449.32		1003.72	1437.17		0	4.56715	2066.35	260.748	109.23
2030		M.	Congenital anomalies			4336.76	3677.34	4730.46		2299.65	2037.11		4149.93	107.376	77.3853	0.986295	1.08262
2030		N.	Oral conditions			1025.41	1087.71	978.484		487.761	537.645		160.096	211.41	499.279	134.825	19.7958
2030	III.	Injuries				60584.7	64694	58882		45121.3	15463.3		6508.06	13678.1	39259.5	817.398	321.633
2030		A.	Unintentional injuries			41759	48137.9	39357.4		29382.9	12376.1		6157.31	12220	22554.9	585.121	241.602
2030			1.	Road traffic accidents		19689.4	22662.2	14492.2		13919.5	5769.9		1666.15	7110.47	10589.5	244.181	79.0832
2030			2.	Poisonings		1790.72	1747.39	1885.3		1198.17	592.554		315.896	309.127	1105.8	47.5365	12.3602
2030			3.	Falls		1672.8	2033.59	1854.32		1125.24	547.562		234.041	612.371	723.767	54.014	48.6104
2030			4.	Fires		2874.71	3139.37	3079.23		1798.2	1076.51		1203.54	1067.84	562.512	23.5275	17.2941
2030			5.	Drownings		3101.33	2952.4	3329.3		2482.83	618.501		521.724	609.474	1937.79	31.4214	0.921077
2030			6.	Other unintentional injuries		12630	15602.9	14717.1		8858.97	3771.07		2215.95	2510.72	7635.59	184.441	83.3333
2030		B.	Intentional injuries			18825.7	16556.2	19524.6		15738.5	3087.25		350.754	1458.07	16704.6	232.277	80.0302
2030			1.	Self-inflicted injuries		1676.8	1698.74	1728.88		1258.46	418.346		0.0606556	133.429	1483.68	40.9836	18.6494
2030			2.	Violence		9364.11	9268.43	10226.9		7510.39	1853.72		294.665	953.635	8001.93	83.6977	30.1736
2030			3.	War		7779.59	5583.55	7563.28		6965.45	814.143		54.7458	369.919	7216.4	107.385	31.1418
